# Supplementary material for: Identification of dissociation factors in pancreatic Cancer using a mass spectrometry-based proteomic approach
Source: Springer Nature journal article supplement (doi:10.1186/s12885-020-6522-3), 2020-01-20
Supplement: MOESM1 [file 12885_2020_6522_MOESM1_ESM.xls]

## Sheet: PC-1.0
Accession	Description	Score	Coverage	# Proteins	# Unique Peptides	# Peptides	# PSMs	# AAs	MW [kDa]	calc. pI
G3GR63	Inter-alpha-trypsin inhibitor heavy chain H2 OS=Cricetulus griseus GN=I79_000006 PE=4 SV=1 - [G3GR63_CRIGR]	372.9	0.0699	1	4	4	15	772	87.4	7.81
G3GSM5	Transferrin receptor protein 1 OS=Cricetulus griseus GN=I79_000642 PE=4 SV=1 - [G3GSM5_CRIGR]	217.02	0.0119	1	1	1	6	757	85	6.77
G3GTJ6	Complement component C8 beta chain OS=Cricetulus griseus GN=I79_000981 PE=4 SV=1 - [G3GTJ6_CRIGR]	517.23	0.0708	1	2	2	13	424	48.3	7.58
G3GTP7	Vitronectin OS=Cricetulus griseus GN=I79_001034 PE=3 SV=1 - [G3GTP7_CRIGR]	333.67	0.0251	2	2	2	14	876	100.1	6.81
G3GU75	Translational activator GCN1 OS=Cricetulus griseus GN=I79_001227 PE=4 SV=1 - [G3GU75_CRIGR]	32.9	0.0026	1	1	1	1	2738	300.6	7.23
G3GUL3	von Willebrand factor OS=Cricetulus griseus GN=I79_001376 PE=4 SV=1 - [G3GUL3_CRIGR]	26.91	0.0025	1	1	1	1	3626	402.3	5.77
G3GUV3	Macrophage metalloelastase OS=Cricetulus griseus GN=I79_001477 PE=4 SV=1 - [G3GUV3_CRIGR]	95.72	0.0237	1	1	1	3	464	53.3	9.35
G3GUV4	Stromelysin-2 OS=Cricetulus griseus GN=I79_001478 PE=4 SV=1 - [G3GUV4_CRIGR]	169.16	0.0476	1	5	5	18	966	107.6	6.2
G3GVD0	Actin, cytoplasmic 1 OS=Cricetulus griseus GN=I79_001666 PE=3 SV=1 - [G3GVD0_CRIGR]	579.79	0.4507	5	6	12	34	375	41.7	5.48
G3GVE4	Guanine nucleotide-binding protein subunit alpha-12 OS=Cricetulus griseus GN=I79_001681 PE=4 SV=1 - [G3GVE4_CRIGR]	0	0.0262	1	1	1	1	305	35.9	9.25
G3GWB1	Hepatocyte growth factor activator OS=Cricetulus griseus GN=I79_002031 PE=3 SV=1 - [G3GWB1_CRIGR]	359.95	0.0745	1	4	4	17	658	70.9	7.4
G3GZL3	Roquin OS=Cricetulus griseus GN=I79_003298 PE=3 SV=1 - [G3GZL3_CRIGR]	687.47	0.0508	1	1	9	51	1418	158.5	7.47
G3H278	60S ribosomal protein L6 OS=Cricetulus griseus GN=I79_004246 PE=3 SV=1 - [G3H278_CRIGR]	30.22	0.0033	1	1	1	1	2693	296.5	6.6
G3H2W6	Extracellular matrix protein 1 OS=Cricetulus griseus GN=I79_004569 PE=4 SV=1 - [G3H2W6_CRIGR]	64.7	0.0604	1	3	3	14	563	63.2	6.8
G3H3E6	Metalloproteinase inhibitor 2 OS=Cricetulus griseus GN=I79_004761 PE=4 SV=1 - [G3H3E6_CRIGR]	107.36	0.1937	2	3	3	13	191	21.5	7.52
G3H672	Insulin-like growth factor I (Fragment) OS=Cricetulus griseus GN=I79_005825 PE=3 SV=1 - [G3H672_CRIGR]	45.66	0.1867	2	1	1	6	75	8.4	9.42
G3H6I5	Interleukin-1 receptor-like 1 OS=Cricetulus griseus GN=I79_005946 PE=4 SV=1 - [G3H6I5_CRIGR]	44.74	0.0151	2	1	1	1	331	37.6	8.98
G3H7G9	Collagen alpha-1(XV) chain OS=Cricetulus griseus GN=I79_006300 PE=4 SV=1 - [G3H7G9_CRIGR]	54.3	0.0175	1	1	1	6	859	91.8	4.44
G3H8P6	Dual specificity mitogen-activated protein kinase kinase 5 OS=Cricetulus griseus GN=I79_006754 PE=3 SV=1 - [G3H8P6_CRIGR]	58.02	0.0097	1	1	1	3	719	78.4	5.05
G3H8Y5	Collagen alpha-1(VI) chain OS=Cricetulus griseus GN=I79_006834 PE=4 SV=1 - [G3H8Y5_CRIGR]	30.25	0.0109	1	1	1	1	822	88.9	6.61
G3HA54	Plasminogen activator inhibitor 1 OS=Cricetulus griseus GN=I79_007296 PE=3 SV=1 - [G3HA54_CRIGR]	36.56	0.0593	1	1	1	1	270	30.7	6.23
G3HAM9	Peroxisomal membrane protein 4 OS=Cricetulus griseus GN=I79_007485 PE=4 SV=1 - [G3HAM9_CRIGR]	21.44	0.0283	3	1	1	1	212	24.3	9.99
G3HBR8	Hemoglobin subunit alpha OS=Cricetulus griseus GN=I79_007867 PE=3 SV=1 - [G3HBR8_CRIGR]	175.66	0.1056	2	1	1	6	142	15.2	7.39
G3HD94	Desmoplakin OS=Cricetulus griseus GN=I79_008473 PE=4 SV=1 - [G3HD94_CRIGR]	99.4	0.0095	1	3	3	6	2836	328.2	6.92
G3HFZ7	Heparin cofactor 2 OS=Cricetulus griseus GN=I79_009514 PE=3 SV=1 - [G3HFZ7_CRIGR]	29.05	0.0167	1	1	1	3	479	54.3	6.73
G3HGW6	Laminin subunit alpha-5 OS=Cricetulus griseus GN=I79_009858 PE=4 SV=1 - [G3HGW6_CRIGR]	201.55	0.0075	1	2	2	8	3735	405.6	6.9
G3HIQ1	Peptidyl-prolyl cis-trans isomerase OS=Cricetulus griseus GN=I79_010526 PE=3 SV=1 - [G3HIQ1_CRIGR]	106.73	0.2195	7	2	3	14	164	17.9	8.28
G3HJD0	Interleukin-28A (Fragment) OS=Cricetulus griseus GN=I79_010771 PE=4 SV=1 - [G3HJD0_CRIGR]	30.28	0.0314	2	1	1	1	191	21.6	8.5
G3HK90	14-3-3 protein eta OS=Cricetulus griseus GN=I79_011108 PE=3 SV=1 - [G3HK90_CRIGR]	145.03	0.0763	17	2	2	9	236	27.1	4.98
G3HKF2	Complement C1q tumor necrosis factor-related protein 3 OS=Cricetulus griseus GN=I79_011172 PE=4 SV=1 - [G3HKF2_CRIGR]	104.64	0.0408	1	1	1	3	319	35	7.39
G3HMB9	Histone H2A OS=Cricetulus griseus GN=I79_011871 PE=3 SV=1 - [G3HMB9_CRIGR]	120.88	0.2969	15	1	2	8	128	13.5	10.58
G3HNJ3	Clusterin OS=Cricetulus griseus GN=I79_012331 PE=3 SV=1 - [G3HNJ3_CRIGR]	338.83	0.1544	1	5	5	23	447	51.7	5.74
G3HPJ2	Alpha-amylase OS=Cricetulus griseus GN=I79_012706 PE=3 SV=1 - [G3HPJ2_CRIGR]	50.63	0.0356	1	1	1	3	450	50.5	7.01
G3HPJ3	Alpha-amylase OS=Cricetulus griseus GN=I79_012707 PE=3 SV=1 - [G3HPJ3_CRIGR]	344.95	0.0239	1	1	1	10	418	46.9	8
G3HPV6	Histone H2A type 1 OS=Cricetulus griseus GN=I79_012827 PE=3 SV=1 - [G3HPV6_CRIGR]	169.86	0.1107	17	2	3	18	262	28.4	11.03
G3HU77	ATP-dependent RNA helicase DDX24 OS=Cricetulus griseus GN=I79_014485 PE=3 SV=1 - [G3HU77_CRIGR]	39.73	0.007	1	1	1	2	853	95.9	9.39
G3HUC0	Anionic trypsin-2 (Fragment) OS=Cricetulus griseus GN=I79_014528 PE=3 SV=1 - [G3HUC0_CRIGR]	127.05	0.0461	2	1	1	14	217	23.2	5.27
G3HYM2	Coagulation factor V OS=Cricetulus griseus GN=I79_016163 PE=4 SV=1 - [G3HYM2_CRIGR]	443.14	0.0336	1	1	6	18	2140	241.5	5.87
G3HZA5	Carboxypeptidase N catalytic chain OS=Cricetulus griseus GN=I79_016402 PE=4 SV=1 - [G3HZA5_CRIGR]	20.56	0.0363	2	1	1	2	413	46.8	6.57
G3HZG4	Apolipoprotein M OS=Cricetulus griseus GN=I79_016465 PE=4 SV=1 - [G3HZG4_CRIGR]	23.42	0.1071	1	1	1	1	56	6.5	8.34
G3I293	Protein Z-dependent protease inhibitor OS=Cricetulus griseus GN=I79_017522 PE=3 SV=1 - [G3I293_CRIGR]	25.93	0.0229	1	2	2	7	349	40.2	8.31
G3I5N6	Insulin-like growth factor-binding protein 4 OS=Cricetulus griseus GN=I79_018789 PE=4 SV=1 - [G3I5N6_CRIGR]	597.15	0.1693	1	2	4	25	254	27.7	7.14
G3I664	Procollagen C-endopeptidase enhancer 1 OS=Cricetulus griseus GN=I79_018976 PE=4 SV=1 - [G3I664_CRIGR]	45.14	0.0177	1	1	1	1	509	55.2	8.13
G3I792	Peptidyl-prolyl cis-trans isomerase OS=Cricetulus griseus GN=I79_019377 PE=3 SV=1 - [G3I792_CRIGR]	79.76	0.2109	3	1	2	5	128	14.1	6.79
G3I8F9	Keratin, type I cytoskeletal 14 OS=Cricetulus griseus GN=I79_019828 PE=3 SV=1 - [G3I8F9_CRIGR]	995.51	0.1884	14	5	11	48	483	52.6	5.16
G3I8G0	Keratin, type I cytoskeletal 17 OS=Cricetulus griseus GN=I79_019831 PE=3 SV=1 - [G3I8G0_CRIGR]	690.62	0.1389	12	1	7	31	432	48	5.06
G3I9L7	EGF-containing fibulin-like extracellular matrix protein 1 OS=Cricetulus griseus GN=I79_020269 PE=4 SV=1 - [G3I9L7_CRIGR]	293.84	0.0913	1	3	3	12	438	48.8	5.05
G3IAL6	Serum albumin OS=Cricetulus griseus GN=I79_020641 PE=4 SV=1 - [G3IAL6_CRIGR]	64.44	0.0605	1	2	3	12	430	48.6	6.02
G3IAX3	Pyruvate kinase OS=Cricetulus griseus GN=I79_020755 PE=3 SV=1 - [G3IAX3_CRIGR]	25.34	0.0542	2	2	2	2	461	50.4	7.81
G3IBN8	Keratin, type II cytoskeletal 6A OS=Cricetulus griseus GN=I79_021069 PE=3 SV=1 - [G3IBN8_CRIGR]	718.44	0.1575	6	3	8	33	457	48.5	7.99
G3IBN9	Keratin, type II cytoskeletal 71 OS=Cricetulus griseus GN=I79_021070 PE=3 SV=1 - [G3IBN9_CRIGR]	1025.57	0.1556	15	4	16	68	1202	133.3	6.55
G3IBP3	Keratin, type II cytoskeletal 2 epidermal OS=Cricetulus griseus GN=I79_021074 PE=3 SV=1 - [G3IBP3_CRIGR]	1002.51	0.1519	11	2	8	47	441	45.9	8.13
G3ID81	Beta-actin-like protein 2 OS=Cricetulus griseus GN=I79_021654 PE=3 SV=1 - [G3ID81_CRIGR]	270.58	0.2074	2	1	5	19	376	42.1	5.48
G3IFZ1	Fibulin-1 OS=Cricetulus griseus GN=I79_022667 PE=4 SV=1 - [G3IFZ1_CRIGR]	184.07	0.0653	1	2	2	7	628	69	5.34
G3IFZ2	Fibulin-1 OS=Cricetulus griseus GN=I79_022668 PE=4 SV=1 - [G3IFZ2_CRIGR]	230.2	0.0513	1	1	1	30	156	18.2	7.46
G3IIF5	Keratin, type II cytoskeletal 5 OS=Cricetulus griseus GN=I79_023623 PE=3 SV=1 - [G3IIF5_CRIGR]	219.98	0.0974	14	2	5	19	431	48	5.73
G3IKI6	Keratin, type II cytoskeletal 1b OS=Cricetulus griseus GN=I79_024389 PE=3 SV=1 - [G3IKI6_CRIGR]	1484	0.103	7	3	10	71	835	93.4	5.45
G3IKI7	Keratin, type II cytoskeletal 2 oral OS=Cricetulus griseus GN=I79_024390 PE=4 SV=1 - [G3IKI7_CRIGR]	512.24	0.0641	7	2	6	31	655	67.8	7.78
G3ILF8	Abhydrolase domain-containing protein 12B OS=Cricetulus griseus GN=I79_024723 PE=4 SV=1 - [G3ILF8_CRIGR]	49.44	0.0293	1	1	1	2	205	23.1	8.03
G3IN01	Kazrin (Fragment) OS=Cricetulus griseus GN=I79_025310 PE=4 SV=1 - [G3IN01_CRIGR]	27.23	0.0272	1	1	1	2	368	41.3	6.43
G3INC5	Cathepsin L1 OS=Cricetulus griseus GN=I79_025440 PE=3 SV=1 - [G3INC5_CRIGR]	284.7	0.0781	1	2	2	8	333	37.2	7.17
G3IPN2	Keratin, type I cytoskeletal 10 (Fragment) OS=Cricetulus griseus GN=I79_025951 PE=3 SV=1 - [G3IPN2_CRIGR]	472.85	0.2428	10	3	8	37	243	27.8	4.49

## Sheet: PC-1
Accession	Description	Score	Coverage	# Proteins	# Unique Peptides	# Peptides	# PSMs	# AAs	MW [kDa]	calc. pI
G3GR63	Inter-alpha-trypsin inhibitor heavy chain H2 OS=Cricetulus griseus GN=I79_000006 PE=4 SV=1 - [G3GR63_CRIGR]	355.12	0.0699	1	4	4	17	772	87.4	7.81
G3GR73	Rab GDP dissociation inhibitor beta OS=Cricetulus griseus GN=I79_000016 PE=4 SV=1 - [G3GR73_CRIGR]	1470.46	0.5258	4	6	18	94	445	50.5	6.25
G3GT95	Mannan-binding lectin serine protease 1 (Fragment) OS=Cricetulus griseus GN=I79_000871 PE=3 SV=1 - [G3GT95_CRIGR]	32.4	0.017	1	1	1	1	706	79.3	5.08
G3GTJ6	Complement component C8 beta chain OS=Cricetulus griseus GN=I79_000981 PE=4 SV=1 - [G3GTJ6_CRIGR]	629.11	0.0731	1	3	3	16	424	48.3	7.58
G3GTP7	Vitronectin OS=Cricetulus griseus GN=I79_001034 PE=3 SV=1 - [G3GTP7_CRIGR]	214.22	0.0251	2	2	2	15	876	100.1	6.81
G3GWB1	Hepatocyte growth factor activator OS=Cricetulus griseus GN=I79_002031 PE=3 SV=1 - [G3GWB1_CRIGR]	535.3	0.0805	1	4	4	15	658	70.9	7.4
G3GWP9	Urokinase-type plasminogen activator OS=Cricetulus griseus GN=I79_002178 PE=3 SV=1 - [G3GWP9_CRIGR]	20.96	0.0403	1	1	1	1	397	44.3	8.06
G3GZF2	Peptidyl-prolyl cis-trans isomerase A OS=Cricetulus griseus GN=I79_003216 PE=3 SV=1 - [G3GZF2_CRIGR]	578.65	0.2273	5	1	5	41	154	16.8	8.34
G3GZL3	Roquin OS=Cricetulus griseus GN=I79_003298 PE=3 SV=1 - [G3GZL3_CRIGR]	873.15	0.0508	1	1	8	54	1418	158.5	7.47
G3GZP9	Apolipoprotein B-100 OS=Cricetulus griseus GN=I79_003342 PE=4 SV=1 - [G3GZP9_CRIGR]	52.37	0.0106	1	1	1	2	946	105.6	7.81
G3H0L9	Cathepsin B OS=Cricetulus griseus GN=I79_003681 PE=3 SV=1 - [G3H0L9_CRIGR]	23.37	0.0236	1	1	1	1	339	37.5	6.13
G3H0U6	Protein disulfide-isomerase A3 OS=Cricetulus griseus GN=I79_003765 PE=4 SV=1 - [G3H0U6_CRIGR]	74.6	0.0676	1	1	3	15	444	50	5.71
G3H0Z4	MAX gene-associated protein OS=Cricetulus griseus GN=I79_003815 PE=3 SV=1 - [G3H0Z4_CRIGR]	0	0.004	1	1	1	1	4009	437.3	6.98
G3H2T4	Histone H2B OS=Cricetulus griseus GN=I79_004536 PE=3 SV=1 - [G3H2T4_CRIGR]	61.81	0.1905	14	2	2	3	126	13.9	10.32
G3H2T7	Histone H3 OS=Cricetulus griseus GN=I79_004539 PE=3 SV=1 - [G3H2T7_CRIGR]	168.89	0.2472	27	2	4	18	267	29.6	11.11
G3H2W6	Extracellular matrix protein 1 OS=Cricetulus griseus GN=I79_004569 PE=4 SV=1 - [G3H2W6_CRIGR]	118.39	0.048	1	3	3	17	563	63.2	6.8
G3H3C6	Tubulin alpha-3 chain OS=Cricetulus griseus GN=I79_004741 PE=3 SV=1 - [G3H3C6_CRIGR]	50.7	0.1157	11	3	3	6	415	46.1	5.12
G3H3E6	Metalloproteinase inhibitor 2 OS=Cricetulus griseus GN=I79_004761 PE=4 SV=1 - [G3H3E6_CRIGR]	329.82	0.3037	2	7	7	22	191	21.5	7.52
G3H3Q1	Pyruvate kinase OS=Cricetulus griseus GN=I79_004880 PE=3 SV=1 - [G3H3Q1_CRIGR]	138.72	0.0869	3	3	3	9	472	51.5	7.68
G3H459	Putative cation-transporting ATPase 13A1 OS=Cricetulus griseus GN=I79_005059 PE=3 SV=1 - [G3H459_CRIGR]	24.17	0.0086	1	1	1	2	811	89.5	8.44
G3H4Z8	Heat shock-related 70 kDa protein 2 OS=Cricetulus griseus GN=I79_005362 PE=3 SV=1 - [G3H4Z8_CRIGR]	64.25	0.0647	12	3	3	8	634	69.6	5.67
G3H5D5	Acyl-CoA-binding protein OS=Cricetulus griseus GN=I79_005522 PE=4 SV=1 - [G3H5D5_CRIGR]	50.61	0.1513	1	1	1	3	119	13.5	9.31
G3H672	Insulin-like growth factor I (Fragment) OS=Cricetulus griseus GN=I79_005825 PE=3 SV=1 - [G3H672_CRIGR]	48.68	0.1867	2	1	1	7	75	8.4	9.42
G3H6I5	Interleukin-1 receptor-like 1 OS=Cricetulus griseus GN=I79_005946 PE=4 SV=1 - [G3H6I5_CRIGR]	44.8	0.0151	2	1	1	1	331	37.6	8.98
G3H6Y5	Peptidyl-prolyl cis-trans isomerase OS=Cricetulus griseus GN=I79_006109 PE=4 SV=1 - [G3H6Y5_CRIGR]	898.87	0.3038	1	1	2	26	79	8.8	7.42
G3H7G9	Collagen alpha-1(XV) chain OS=Cricetulus griseus GN=I79_006300 PE=4 SV=1 - [G3H7G9_CRIGR]	27.52	0.0175	1	1	1	3	859	91.8	4.44
G3H7Z2	Transgelin-2 OS=Cricetulus griseus GN=I79_006488 PE=4 SV=1 - [G3H7Z2_CRIGR]	137.32	0.1709	2	3	3	7	199	22.4	8.57
G3H8P6	Dual specificity mitogen-activated protein kinase kinase 5 OS=Cricetulus griseus GN=I79_006754 PE=3 SV=1 - [G3H8P6_CRIGR]	45.53	0.0097	1	1	1	2	719	78.4	5.05
G3H8Y5	Collagen alpha-1(VI) chain OS=Cricetulus griseus GN=I79_006834 PE=4 SV=1 - [G3H8Y5_CRIGR]	49.97	0.0109	1	1	1	1	822	88.9	6.61
G3H8Y8	Collagen alpha-1(XVIII) chain OS=Cricetulus griseus GN=I79_006837 PE=4 SV=1 - [G3H8Y8_CRIGR]	123.53	0.0102	1	1	1	10	883	95.5	6.33
G3H925	Zinc finger protein 362 OS=Cricetulus griseus GN=I79_006887 PE=4 SV=1 - [G3H925_CRIGR]	29.71	0.0173	1	1	1	1	405	44.3	9.51
G3H945	Eukaryotic translation initiation factor 3 subunit I OS=Cricetulus griseus GN=Eif3i PE=3 SV=1 - [G3H945_CRIGR]	29.99	0.0185	2	1	1	3	325	36.3	5.64
G3H9M9	Microtubule-associated protein RP/EB family member 2 OS=Cricetulus griseus GN=I79_007106 PE=4 SV=1 - [G3H9M9_CRIGR]	20.45	0.0252	2	1	1	3	318	35.5	5.52
G3HAM9	Peroxisomal membrane protein 4 OS=Cricetulus griseus GN=I79_007485 PE=4 SV=1 - [G3HAM9_CRIGR]	21.69	0.0283	3	1	1	1	212	24.3	9.99
G3HB04	Protein disulfide-isomerase A6 OS=Cricetulus griseus GN=I79_007616 PE=4 SV=1 - [G3HB04_CRIGR]	0	0.0927	1	1	1	1	259	28.4	4.91
G3HBP2	Insulin-like growth factor-binding protein complex acid labile chain OS=Cricetulus griseus GN=I79_007946 PE=4 SV=1 - [G3HBP2_CRIGR]	0	0.0337	1	1	1	1	416	46.8	8.1
G3HBR8	Hemoglobin subunit alpha OS=Cricetulus griseus GN=I79_007867 PE=3 SV=1 - [G3HBR8_CRIGR]	120.01	0.1056	2	1	1	4	142	15.2	7.39
G3HD94	Desmoplakin OS=Cricetulus griseus GN=I79_008473 PE=4 SV=1 - [G3HD94_CRIGR]	97.65	0.0071	1	2	2	4	2836	328.2	6.92
G3HD97	Thioredoxin domain-containing protein 5 OS=Cricetulus griseus GN=I79_008476 PE=3 SV=1 - [G3HD97_CRIGR]	86.9	0.1079	1	3	3	3	417	46.3	5.91
G3HDS7	Histone H1.3 OS=Cricetulus griseus GN=I79_008693 PE=3 SV=1 - [G3HDS7_CRIGR]	108.84	0.1014	1	3	3	10	207	20.5	11.02
G3HE53	Dermatopontin OS=Cricetulus griseus GN=I79_008827 PE=4 SV=1 - [G3HE53_CRIGR]	34.78	0.1244	2	2	2	3	201	24	4.89
G3HFY9	Ubiquitin-conjugating enzyme E2 L3 OS=Cricetulus griseus GN=I79_009507 PE=3 SV=1 - [G3HFY9_CRIGR]	67.29	0.2727	2	3	3	12	154	17.8	8.22
G3HG95	Lamin-A/C OS=Cricetulus griseus GN=I79_009616 PE=3 SV=1 - [G3HG95_CRIGR]	175.88	0.0249	1	1	1	5	563	64	8.02
G3HI59	Short-chain specific acyl-CoA dehydrogenase, mitochondrial OS=Cricetulus griseus GN=I79_010326 PE=3 SV=1 - [G3HI59_CRIGR]	71	0.017	2	1	1	2	412	44.7	8.03
G3HIQ1	Peptidyl-prolyl cis-trans isomerase OS=Cricetulus griseus GN=I79_010526 PE=3 SV=1 - [G3HIQ1_CRIGR]	1220.38	0.561	10	4	8	69	164	17.9	8.28
G3HJM9	Neuromodulin OS=Cricetulus griseus GN=I79_010877 PE=4 SV=1 - [G3HJM9_CRIGR]	31.15	0.085	1	1	1	2	200	20.7	4.7
G3HKF2	Complement C1q tumor necrosis factor-related protein 3 OS=Cricetulus griseus GN=I79_011172 PE=4 SV=1 - [G3HKF2_CRIGR]	174.04	0.0408	1	1	1	3	319	35	7.39
G3HKZ1	14-3-3 protein zeta/delta OS=Cricetulus griseus GN=I79_011374 PE=3 SV=1 - [G3HKZ1_CRIGR]	515.91	0.1796	15	2	4	14	245	27.7	4.79
G3HMV2	60S ribosomal protein L11 OS=Cricetulus griseus GN=I79_012069 PE=3 SV=1 - [G3HMV2_CRIGR]	33.04	0.0674	1	1	1	3	178	20.3	9.6
G3HNJ3	Clusterin OS=Cricetulus griseus GN=I79_012331 PE=3 SV=1 - [G3HNJ3_CRIGR]	21.24	0.0403	1	2	2	2	447	51.7	5.74
G3HP56	Glucosamine--fructose-6-phosphate aminotransferase [isomerizing] 2 OS=Cricetulus griseus GN=I79_012560 PE=4 SV=1 - [G3HP56_CRIGR]	95.37	0.033	2	1	1	5	273	30.3	8.37
G3HPJ3	Alpha-amylase OS=Cricetulus griseus GN=I79_012707 PE=3 SV=1 - [G3HPJ3_CRIGR]	432.8	0.0239	1	1	1	13	418	46.9	8
G3HPV6	Histone H2A type 1 OS=Cricetulus griseus GN=I79_012827 PE=3 SV=1 - [G3HPV6_CRIGR]	363.75	0.1832	19	2	4	28	262	28.4	11.03
G3HQ18	Tetraspanin-14 OS=Cricetulus griseus GN=I79_012907 PE=4 SV=1 - [G3HQ18_CRIGR]	27.18	0.0296	1	1	1	2	270	30.7	6.51
G3HQP8	Tubulin beta-7 chain OS=Cricetulus griseus GN=I79_013153 PE=3 SV=1 - [G3HQP8_CRIGR]	0	0.0428	1	1	1	1	444	49.6	4.89
G3HTP6	Alpha-enolase OS=Cricetulus griseus GN=I79_014274 PE=4 SV=1 - [G3HTP6_CRIGR]	152.07	0.1626	1	1	2	12	123	13.9	4.94
G3HTZ1	Myelin protein P0 OS=Cricetulus griseus GN=I79_014394 PE=4 SV=1 - [G3HTZ1_CRIGR]	220.91	0.032	1	1	2	6	437	48.8	9.51
G3HUC0	Anionic trypsin-2 (Fragment) OS=Cricetulus griseus GN=I79_014528 PE=3 SV=1 - [G3HUC0_CRIGR]	214.52	0.0461	2	1	1	17	217	23.2	5.27
G3HUU6	Protein S100-A11 OS=Cricetulus griseus GN=I79_014714 PE=4 SV=1 - [G3HUU6_CRIGR]	105.81	0.11	1	1	1	3	100	11.2	7.08
G3HWN2	UPF0195 protein FAM96A OS=Cricetulus griseus GN=I79_015392 PE=4 SV=1 - [G3HWN2_CRIGR]	16.53	0.0471	1	1	1	1	170	19.4	4.78
G3HYR4	NEDD4-binding protein 1 OS=Cricetulus griseus GN=I79_016205 PE=4 SV=1 - [G3HYR4_CRIGR]	33.24	0.0123	1	1	1	1	811	90.4	5.73
G3I0M2	Platelet-activating factor acetylhydrolase IB subunit gamma OS=Cricetulus griseus GN=I79_016910 PE=4 SV=1 - [G3I0M2_CRIGR]	25.85	0.0395	2	1	1	1	228	25.5	8.63
G3I293	Protein Z-dependent protease inhibitor OS=Cricetulus griseus GN=I79_017522 PE=3 SV=1 - [G3I293_CRIGR]	20.65	0.0229	1	2	2	3	349	40.2	8.31
G3I2G7	EGF-containing fibulin-like extracellular matrix protein 2 OS=Cricetulus griseus GN=I79_017609 PE=4 SV=1 - [G3I2G7_CRIGR]	78.83	0.08	1	2	2	5	375	42	5.4
G3I474	Putative bifunctional methylenetetrahydrofolate dehydrogenase/cyclohydrolase 2 OS=Cricetulus griseus GN=I79_018250 PE=3 SV=1 - [G3I474_CRIGR]	214.56	0.0538	1	1	1	6	279	30.3	8.75
G3I4H6	Fructose-bisphosphate aldolase OS=Cricetulus griseus GN=I79_018355 PE=3 SV=1 - [G3I4H6_CRIGR]	65.26	0.1621	5	6	6	11	364	39.4	8.07
G3I4L3	Spectrin beta chain, brain 2 OS=Cricetulus griseus GN=I79_018396 PE=4 SV=1 - [G3I4L3_CRIGR]	0	0.0741	3	1	1	1	81	9.2	7.75
G3I4Z7	Galectin OS=Cricetulus griseus GN=I79_018538 PE=4 SV=1 - [G3I4Z7_CRIGR]	360.58	0.3926	1	4	4	24	135	14.8	5.8
G3I5L3	Annexin OS=Cricetulus griseus GN=I79_018766 PE=3 SV=1 - [G3I5L3_CRIGR]	446.83	0.2399	2	8	8	22	346	38.8	7.02
G3I5N6	Insulin-like growth factor-binding protein 4 OS=Cricetulus griseus GN=I79_018789 PE=4 SV=1 - [G3I5N6_CRIGR]	381.3	0.1693	1	2	4	20	254	27.7	7.14
G3I643	Hepatocyte nuclear factor 1-beta OS=Cricetulus griseus GN=I79_018955 PE=3 SV=1 - [G3I643_CRIGR]	0	0.0118	1	1	1	1	593	65.3	8.03
G3I664	Procollagen C-endopeptidase enhancer 1 OS=Cricetulus griseus GN=I79_018976 PE=4 SV=1 - [G3I664_CRIGR]	47.33	0.0177	1	1	1	1	509	55.2	8.13
G3I7L6	Desmocollin-1 OS=Cricetulus griseus GN=I79_019509 PE=3 SV=1 - [G3I7L6_CRIGR]	22.62	0.0239	1	1	1	2	544	60.8	4.84
G3I877	Stress-induced-phosphoprotein 1 OS=Cricetulus griseus GN=I79_019739 PE=4 SV=1 - [G3I877_CRIGR]	63.86	0.0184	2	1	1	1	543	62.6	6.8
G3I8F7	Keratin, type I cytoskeletal 19 OS=Cricetulus griseus GN=I79_019825 PE=3 SV=1 - [G3I8F7_CRIGR]	473.73	0.1414	8	1	7	30	403	44.4	5.25
G3I8F9	Keratin, type I cytoskeletal 14 OS=Cricetulus griseus GN=I79_019828 PE=3 SV=1 - [G3I8F9_CRIGR]	783.61	0.2112	9	4	13	50	483	52.6	5.16
G3I8G0	Keratin, type I cytoskeletal 17 OS=Cricetulus griseus GN=I79_019831 PE=3 SV=1 - [G3I8G0_CRIGR]	1279.39	0.2477	7	3	13	59	432	48	5.06
G3I8G1	Keratin, type I cytoskeletal 42 OS=Cricetulus griseus GN=I79_019833 PE=3 SV=1 - [G3I8G1_CRIGR]	421.17	0.159	7	1	8	28	459	50.8	5.21
G3I8R9	78 kDa glucose-regulated protein OS=Cricetulus griseus GN=I79_019946 PE=1 SV=1 - [G3I8R9_CRIGR]	76.3	0.026	2	1	1	2	654	72.3	5.16
G3I936	Epididymal secretory protein E1 OS=Cricetulus griseus GN=I79_020069 PE=4 SV=1 - [G3I936_CRIGR]	24.77	0.1074	1	1	1	4	149	16.5	7.97
G3I9L7	EGF-containing fibulin-like extracellular matrix protein 1 OS=Cricetulus griseus GN=I79_020269 PE=4 SV=1 - [G3I9L7_CRIGR]	379.64	0.121	1	4	4	13	438	48.8	5.05
G3IAL6	Serum albumin OS=Cricetulus griseus GN=I79_020641 PE=4 SV=1 - [G3IAL6_CRIGR]	34.59	0.0605	1	2	3	14	430	48.6	6.02
G3IAP3	Connective tissue growth factor OS=Cricetulus griseus GN=I79_020669 PE=4 SV=1 - [G3IAP3_CRIGR]	106.61	0.0431	2	1	1	2	348	38.1	7.94
G3IAQ0	Alpha-enolase OS=Cricetulus griseus GN=I79_020676 PE=3 SV=1 - [G3IAQ0_CRIGR]	1444.7	0.331	8	1	11	56	429	46.7	6.16
G3IAZ4	Cysteine-rich protein 1 OS=Cricetulus griseus GN=I79_020780 PE=4 SV=1 - [G3IAZ4_CRIGR]	65.95	0.1429	2	2	2	5	70	7.8	8.38
G3IBN8	Keratin, type II cytoskeletal 6A OS=Cricetulus griseus GN=I79_021069 PE=3 SV=1 - [G3IBN8_CRIGR]	657.19	0.1335	2	3	7	30	457	48.5	7.99
G3IBN9	Keratin, type II cytoskeletal 71 OS=Cricetulus griseus GN=I79_021070 PE=3 SV=1 - [G3IBN9_CRIGR]	1144.78	0.1456	12	3	14	72	1202	133.3	6.55
G3IBP3	Keratin, type II cytoskeletal 2 epidermal OS=Cricetulus griseus GN=I79_021074 PE=3 SV=1 - [G3IBP3_CRIGR]	1115.6	0.127	7	2	7	44	441	45.9	8.13
G3ID81	Beta-actin-like protein 2 OS=Cricetulus griseus GN=I79_021654 PE=3 SV=1 - [G3ID81_CRIGR]	446.28	0.2074	2	1	5	27	376	42.1	5.48
G3IEY9	14-3-3 protein theta OS=Cricetulus griseus GN=I79_022299 PE=3 SV=1 - [G3IEY9_CRIGR]	126.7	0.1184	15	1	3	6	245	27.7	4.78
G3IF80	Nucleolin OS=Cricetulus griseus GN=I79_022400 PE=4 SV=1 - [G3IF80_CRIGR]	50.57	0.0188	1	1	1	2	479	52.4	4.5
G3IFZ1	Fibulin-1 OS=Cricetulus griseus GN=I79_022667 PE=4 SV=1 - [G3IFZ1_CRIGR]	311.69	0.0653	1	2	2	9	628	69	5.34
G3IFZ2	Fibulin-1 OS=Cricetulus griseus GN=I79_022668 PE=4 SV=1 - [G3IFZ2_CRIGR]	65.39	0.0513	1	1	1	5	156	18.2	7.46
G3IG03	Putative uncharacterized protein OS=Cricetulus griseus GN=I79_022680 PE=4 SV=1 - [G3IG03_CRIGR]	32.9	0.1587	1	1	1	2	63	6.9	8.22
G3IG05	Annexin OS=Cricetulus griseus GN=I79_022682 PE=3 SV=1 - [G3IG05_CRIGR]	1096.92	0.4918	1	3	13	40	244	27	5.97
G3IH98	Keratin, type II cytoskeletal 8 OS=Cricetulus griseus GN=I79_023186 PE=3 SV=1 - [G3IH98_CRIGR]	273.43	0.0902	12	2	5	16	488	54.3	5.82
G3IIF5	Keratin, type II cytoskeletal 5 OS=Cricetulus griseus GN=I79_023623 PE=3 SV=1 - [G3IIF5_CRIGR]	428.2	0.0974	12	1	5	29	431	48	5.73
G3IKI6	Keratin, type II cytoskeletal 1b OS=Cricetulus griseus GN=I79_024389 PE=3 SV=1 - [G3IKI6_CRIGR]	1744.53	0.103	7	3	9	78	835	93.4	5.45
G3IKI7	Keratin, type II cytoskeletal 2 oral OS=Cricetulus griseus GN=I79_024390 PE=4 SV=1 - [G3IKI7_CRIGR]	578.61	0.0595	8	1	5	33	655	67.8	7.78
G3IKQ8	Collagen alpha-3(VI) chain OS=Cricetulus griseus GN=I79_024461 PE=4 SV=1 - [G3IKQ8_CRIGR]	186.26	0.0365	1	1	1	5	329	36.9	8.82
G3ILF8	Abhydrolase domain-containing protein 12B OS=Cricetulus griseus GN=I79_024723 PE=4 SV=1 - [G3ILF8_CRIGR]	49.86	0.0293	1	1	1	2	205	23.1	8.03
G3INC5	Cathepsin L1 OS=Cricetulus griseus GN=I79_025440 PE=3 SV=1 - [G3INC5_CRIGR]	249.7	0.039	1	1	1	5	333	37.2	7.17
G3INR8	[Pyruvate dehydrogenase [acetyl-transferring]]-phosphatase 2, mitochondrial OS=Cricetulus griseus GN=I79_025601 PE=4 SV=1 - [G3INR8_CRIGR]	26.86	0.0289	2	1	1	1	242	26.9	6.79
G3IPC7	Keratin, type I cytoskeletal 28 OS=Cricetulus griseus GN=I79_025833 PE=4 SV=1 - [G3IPC7_CRIGR]	101.02	0.0709	5	1	2	9	268	28.8	6.73
G3IPN2	Keratin, type I cytoskeletal 10 (Fragment) OS=Cricetulus griseus GN=I79_025951 PE=3 SV=1 - [G3IPN2_CRIGR]	595.57	0.2428	5	2	7	35	243	27.8	4.49

## Sheet: RPMI 1640 Medium
Accession	Description	Score	Coverage	# Proteins	# Unique Peptides	# Peptides	# PSMs	# AAs	MW [kDa]	calc. pI
G3GR63	Inter-alpha-trypsin inhibitor heavy chain H2 OS=Cricetulus griseus GN=I79_000006 PE=4 SV=1 - [G3GR63_CRIGR]	257.36	0.0699	1	4	4	13	772	87.4	7.81
G3GTJ6	Complement component C8 beta chain OS=Cricetulus griseus GN=I79_000981 PE=4 SV=1 - [G3GTJ6_CRIGR]	436.12	0.0708	1	2	2	14	424	48.3	7.58
G3GTP7	Vitronectin OS=Cricetulus griseus GN=I79_001034 PE=3 SV=1 - [G3GTP7_CRIGR]	298.1	0.0251	2	2	2	11	876	100.1	6.81
G3GUL3	von Willebrand factor OS=Cricetulus griseus GN=I79_001376 PE=4 SV=1 - [G3GUL3_CRIGR]	57.85	0.0025	1	1	1	3	3626	402.3	5.77
G3GVD0	Actin, cytoplasmic 1 OS=Cricetulus griseus GN=I79_001666 PE=3 SV=1 - [G3GVD0_CRIGR]	493.37	0.3093	13	8	8	38	375	41.7	5.48
G3GVE4	Guanine nucleotide-binding protein subunit alpha-12 OS=Cricetulus griseus GN=I79_001681 PE=4 SV=1 - [G3GVE4_CRIGR]	26.85	0.0262	1	1	1	2	305	35.9	9.25
G3GWB1	Hepatocyte growth factor activator OS=Cricetulus griseus GN=I79_002031 PE=3 SV=1 - [G3GWB1_CRIGR]	554.28	0.114	1	8	8	30	658	70.9	7.4
G3GWW0	Proteoglycan 4 OS=Cricetulus griseus GN=I79_002245 PE=4 SV=1 - [G3GWW0_CRIGR]	23.1	0.0175	1	1	1	3	973	106.1	9.33
G3GZL3	Roquin OS=Cricetulus griseus GN=I79_003298 PE=3 SV=1 - [G3GZL3_CRIGR]	638.27	0.043	1	1	9	61	1418	158.5	7.47
G3GZP9	Apolipoprotein B-100 OS=Cricetulus griseus GN=I79_003342 PE=4 SV=1 - [G3GZP9_CRIGR]	30.49	0.0063	1	1	1	1	946	105.6	7.81
G3H0Z4	MAX gene-associated protein OS=Cricetulus griseus GN=I79_003815 PE=3 SV=1 - [G3H0Z4_CRIGR]	0	0.004	1	1	1	1	4009	437.3	6.98
G3H2W6	Extracellular matrix protein 1 OS=Cricetulus griseus GN=I79_004569 PE=4 SV=1 - [G3H2W6_CRIGR]	81.72	0.048	1	3	3	13	563	63.2	6.8
G3H3E6	Metalloproteinase inhibitor 2 OS=Cricetulus griseus GN=I79_004761 PE=4 SV=1 - [G3H3E6_CRIGR]	158.36	0.2251	2	4	4	16	191	21.5	7.52
G3H3Q1	Pyruvate kinase OS=Cricetulus griseus GN=I79_004880 PE=3 SV=1 - [G3H3Q1_CRIGR]	53.55	0.0169	1	1	1	4	472	51.5	7.68
G3H672	Insulin-like growth factor I (Fragment) OS=Cricetulus griseus GN=I79_005825 PE=3 SV=1 - [G3H672_CRIGR]	41.97	0.1867	2	1	1	5	75	8.4	9.42
G3H6I5	Interleukin-1 receptor-like 1 OS=Cricetulus griseus GN=I79_005946 PE=4 SV=1 - [G3H6I5_CRIGR]	58.62	0.0151	2	1	1	2	331	37.6	8.98
G3H768	Regulator of nonsense transcripts 3B OS=Cricetulus griseus GN=I79_006194 PE=4 SV=1 - [G3H768_CRIGR]	33.09	0.0519	1	1	1	1	154	18.8	9.86
G3H7G9	Collagen alpha-1(XV) chain OS=Cricetulus griseus GN=I79_006300 PE=4 SV=1 - [G3H7G9_CRIGR]	46.78	0.0175	1	1	1	4	859	91.8	4.44
G3H8F4	Dystroglycan OS=Cricetulus griseus GN=I79_006654 PE=4 SV=1 - [G3H8F4_CRIGR]	115.25	0.0168	2	1	1	2	893	96.8	8.54
G3H8P6	Dual specificity mitogen-activated protein kinase kinase 5 OS=Cricetulus griseus GN=I79_006754 PE=3 SV=1 - [G3H8P6_CRIGR]	153.66	0.0097	1	1	1	9	719	78.4	5.05
G3H8R2	Mitochondrial intermediate peptidase OS=Cricetulus griseus GN=I79_006773 PE=3 SV=1 - [G3H8R2_CRIGR]	0	0.0153	1	1	1	1	718	81.4	6.99
G3H8Y5	Collagen alpha-1(VI) chain OS=Cricetulus griseus GN=I79_006834 PE=4 SV=1 - [G3H8Y5_CRIGR]	68.74	0.0109	1	1	1	2	822	88.9	6.61
G3H8Y8	Collagen alpha-1(XVIII) chain OS=Cricetulus griseus GN=I79_006837 PE=4 SV=1 - [G3H8Y8_CRIGR]	103.5	0.0102	1	1	1	10	883	95.5	6.33
G3HAZ7	Ras association domain-containing protein 5 OS=Cricetulus griseus GN=I79_007609 PE=4 SV=1 - [G3HAZ7_CRIGR]	25.66	0.0366	1	1	1	1	246	28	8.48
G3HBP2	Insulin-like growth factor-binding protein complex acid labile chain OS=Cricetulus griseus GN=I79_007946 PE=4 SV=1 - [G3HBP2_CRIGR]	26.09	0.0409	1	2	2	2	416	46.8	8.1
G3HC84	Heat shock protein HSP 90-beta OS=Cricetulus griseus GN=I79_008088 PE=4 SV=1 - [G3HC84_CRIGR]	84.85	0.034	5	1	1	2	412	47.8	5.41
G3HE53	Dermatopontin OS=Cricetulus griseus GN=I79_008827 PE=4 SV=1 - [G3HE53_CRIGR]	37.97	0.1791	2	3	3	4	201	24	4.89
G3HFF0	Solute carrier family 2, facilitated glucose transporter member 1 (Fragment) OS=Cricetulus griseus GN=I79_009336 PE=3 SV=1 - [G3HFF0_CRIGR]	30.24	0.0226	2	1	1	4	486	53.3	8.73
G3HFZ7	Heparin cofactor 2 OS=Cricetulus griseus GN=I79_009514 PE=3 SV=1 - [G3HFZ7_CRIGR]	21.27	0.0167	1	1	1	1	479	54.3	6.73
G3HJD0	Interleukin-28A (Fragment) OS=Cricetulus griseus GN=I79_010771 PE=4 SV=1 - [G3HJD0_CRIGR]	27.66	0.0314	2	1	1	1	191	21.6	8.5
G3HKF2	Complement C1q tumor necrosis factor-related protein 3 OS=Cricetulus griseus GN=I79_011172 PE=4 SV=1 - [G3HKF2_CRIGR]	167.85	0.0408	1	1	1	3	319	35	7.39
G3HKZ1	14-3-3 protein zeta/delta OS=Cricetulus griseus GN=I79_011374 PE=3 SV=1 - [G3HKZ1_CRIGR]	68.93	0.1388	15	3	3	6	245	27.7	4.79
G3HM65	Protein Wiz OS=Cricetulus griseus GN=I79_011813 PE=4 SV=1 - [G3HM65_CRIGR]	34.41	0.0035	1	1	1	1	1722	187.7	7.18
G3HMB8	Peptidyl-prolyl cis-trans isomerase OS=Cricetulus griseus GN=I79_011869 PE=3 SV=1 - [G3HMB8_CRIGR]	46.13	0.1207	5	1	1	9	116	12.5	8.32
G3HMB9	Histone H2A OS=Cricetulus griseus GN=I79_011871 PE=3 SV=1 - [G3HMB9_CRIGR]	59.29	0.2969	13	1	2	5	128	13.5	10.58
G3HMX8	Uncharacterized protein C5orf34-like OS=Cricetulus griseus GN=I79_012108 PE=4 SV=1 - [G3HMX8_CRIGR]	0	0.0157	1	1	1	1	638	72.5	7.42
G3HPJ2	Alpha-amylase OS=Cricetulus griseus GN=I79_012706 PE=3 SV=1 - [G3HPJ2_CRIGR]	27.78	0.0622	1	2	2	3	450	50.5	7.01
G3HPJ3	Alpha-amylase OS=Cricetulus griseus GN=I79_012707 PE=3 SV=1 - [G3HPJ3_CRIGR]	274.28	0.0239	1	1	1	11	418	46.9	8
G3HPV6	Histone H2A type 1 OS=Cricetulus griseus GN=I79_012827 PE=3 SV=1 - [G3HPV6_CRIGR]	102.54	0.0802	17	1	2	10	262	28.4	11.03
G3HR76	Cullin-7 OS=Cricetulus griseus GN=I79_013339 PE=3 SV=1 - [G3HR76_CRIGR]	38.9	0.0069	1	1	1	2	1738	196.8	5.91
G3HUC0	Anionic trypsin-2 (Fragment) OS=Cricetulus griseus GN=I79_014528 PE=3 SV=1 - [G3HUC0_CRIGR]	182.06	0.0461	2	1	1	16	217	23.2	5.27
G3HXN0	Protein dopey-2 OS=Cricetulus griseus GN=I79_015758 PE=4 SV=1 - [G3HXN0_CRIGR]	31.93	0.0017	1	1	1	1	2882	323.2	5.76
G3HZ18	Sperm motility kinase W OS=Cricetulus griseus GN=I79_016313 PE=4 SV=1 - [G3HZ18_CRIGR]	22.34	0.0206	1	1	1	1	485	54.3	9.17
G3HZG4	Apolipoprotein M OS=Cricetulus griseus GN=I79_016465 PE=4 SV=1 - [G3HZG4_CRIGR]	27.05	0.1071	1	1	1	3	56	6.5	8.34
G3I0W1	Alpha-enolase OS=Cricetulus griseus GN=I79_017003 PE=4 SV=1 - [G3I0W1_CRIGR]	29.71	0.0719	4	1	1	7	139	15.4	5.15
G3I1N0	Transient receptor potential cation channel subfamily V member 3 OS=Cricetulus griseus GN=I79_017293 PE=4 SV=1 - [G3I1N0_CRIGR]	29.04	0.005	1	1	1	2	1412	161.1	6.9
G3I293	Protein Z-dependent protease inhibitor OS=Cricetulus griseus GN=I79_017522 PE=3 SV=1 - [G3I293_CRIGR]	28.49	0.0372	1	2	2	2	349	40.2	8.31
G3I4J5	Nicotinate-nucleotide pyrophosphorylase [carboxylating] OS=Cricetulus griseus GN=I79_018375 PE=4 SV=1 - [G3I4J5_CRIGR]	0	0.0546	1	1	1	1	183	19	7.11
G3I643	Hepatocyte nuclear factor 1-beta OS=Cricetulus griseus GN=I79_018955 PE=3 SV=1 - [G3I643_CRIGR]	0	0.0118	1	1	1	1	593	65.3	8.03
G3I664	Procollagen C-endopeptidase enhancer 1 OS=Cricetulus griseus GN=I79_018976 PE=4 SV=1 - [G3I664_CRIGR]	71.43	0.0177	1	1	1	2	509	55.2	8.13
G3I8F9	Keratin, type I cytoskeletal 14 OS=Cricetulus griseus GN=I79_019828 PE=3 SV=1 - [G3I8F9_CRIGR]	888.58	0.1118	15	5	7	43	483	52.6	5.16
G3I9L7	EGF-containing fibulin-like extracellular matrix protein 1 OS=Cricetulus griseus GN=I79_020269 PE=4 SV=1 - [G3I9L7_CRIGR]	433.41	0.0913	1	3	3	15	438	48.8	5.05
G3IAL6	Serum albumin OS=Cricetulus griseus GN=I79_020641 PE=4 SV=1 - [G3IAL6_CRIGR]	57.74	0.0605	1	2	3	12	430	48.6	6.02
G3IBN9	Keratin, type II cytoskeletal 71 OS=Cricetulus griseus GN=I79_021070 PE=3 SV=1 - [G3IBN9_CRIGR]	826.41	0.1331	16	2	13	54	1202	133.3	6.55
G3IBP3	Keratin, type II cytoskeletal 2 epidermal OS=Cricetulus griseus GN=I79_021074 PE=3 SV=1 - [G3IBP3_CRIGR]	914.5	0.1633	10	2	9	43	441	45.9	8.13
G3IFZ1	Fibulin-1 OS=Cricetulus griseus GN=I79_022667 PE=4 SV=1 - [G3IFZ1_CRIGR]	290.09	0.0653	1	2	2	9	628	69	5.34
G3IFZ2	Fibulin-1 OS=Cricetulus griseus GN=I79_022668 PE=4 SV=1 - [G3IFZ2_CRIGR]	72.04	0.0513	1	1	1	5	156	18.2	7.46
G3IG03	Putative uncharacterized protein OS=Cricetulus griseus GN=I79_022680 PE=4 SV=1 - [G3IG03_CRIGR]	51.37	0.1587	1	1	1	2	63	6.9	8.22
G3IIF5	Keratin, type II cytoskeletal 5 OS=Cricetulus griseus GN=I79_023623 PE=3 SV=1 - [G3IIF5_CRIGR]	350.97	0.0696	10	1	4	22	431	48	5.73
G3IKI6	Keratin, type II cytoskeletal 1b OS=Cricetulus griseus GN=I79_024389 PE=3 SV=1 - [G3IKI6_CRIGR]	1403.76	0.115	7	3	10	68	835	93.4	5.45
G3IKI7	Keratin, type II cytoskeletal 2 oral OS=Cricetulus griseus GN=I79_024390 PE=4 SV=1 - [G3IKI7_CRIGR]	531.35	0.0672	7	1	6	31	655	67.8	7.78
G3IKQ8	Collagen alpha-3(VI) chain OS=Cricetulus griseus GN=I79_024461 PE=4 SV=1 - [G3IKQ8_CRIGR]	126.79	0.0365	1	1	1	6	329	36.9	8.82
G3ILF8	Abhydrolase domain-containing protein 12B OS=Cricetulus griseus GN=I79_024723 PE=4 SV=1 - [G3ILF8_CRIGR]	80.04	0.0293	1	1	1	6	205	23.1	8.03
G3IPC7	Keratin, type I cytoskeletal 28 OS=Cricetulus griseus GN=I79_025833 PE=4 SV=1 - [G3IPC7_CRIGR]	99.9	0.0709	9	1	2	7	268	28.8	6.73
G3IPN2	Keratin, type I cytoskeletal 10 (Fragment) OS=Cricetulus griseus GN=I79_025951 PE=3 SV=1 - [G3IPN2_CRIGR]	454.73	0.2428	10	3	8	36	243	27.8	4.49

## Sheet: Results
Accession	Gene Name	Description	Score	Coverage	# Proteins	# Unique Peptides	# Peptides	# PSMs	# AAs	MW [kDa]	calc. pI
G3GUV4	MMP10	Stromelysin-2 OS=Cricetulus griseus GN=I79_001478 PE=4 SV=1 - [G3GUV4_CRIGR]	169.16	0.0476	1	5	5	18	966	107.6	6.2
G3HYM2	THPH2	Coagulation factor V OS=Cricetulus griseus GN=I79_016163 PE=4 SV=1 - [G3HYM2_CRIGR]	443.14	0.0336	1	1	6	18	2140	241.5	5.87
G3HK90	YWHAG	14-3-3 protein eta OS=Cricetulus griseus GN=I79_011108 PE=3 SV=1 - [G3HK90_CRIGR]	145.03	0.0763	17	2	2	9	236	27.1	4.98
G3HGW6	LAMA5	Laminin subunit alpha-5 OS=Cricetulus griseus GN=I79_009858 PE=4 SV=1 - [G3HGW6_CRIGR]	201.55	0.0075	1	2	2	8	3735	405.6	6.9
G3GUV3	MMP12	Macrophage metalloelastase OS=Cricetulus griseus GN=I79_001477 PE=4 SV=1 - [G3GUV3_CRIGR]	95.72	0.0237	1	1	1	3	464	53.3	9.35
G3HZA5	CPN1	Carboxypeptidase N catalytic chain OS=Cricetulus griseus GN=I79_016402 PE=4 SV=1 - [G3HZA5_CRIGR]	20.56	0.0363	2	1	1	2	413	46.8	6.57
G3GSM5	TFRC	Transferrin receptor protein 1
G3GU75	GCN1	Translational activator GCN1
G3H278	RPL6	60S ribosomal protein L6
G3HA54	PLANH1	Plasminogen activator inhibitor 1
G3HU77	DDX24	ATP-dependent RNA helicase DDX24
G3I792	PIN1	Peptidyl-prolyl cis-trans isomerase
G3IAX3	Pyruvate kinase	Pyruvate kinase
G3IN01	KAZN	Kazrin (Fragment)
