# Supplementary material for: Identification of dissociation factors in pancreatic Cancer using a mass spectrometry-based proteomic approach
Source: Springer Nature journal article supplement (doi:10.1186/s12885-020-6522-3), 2020-01-20
Supplement: MOESM2 [file 12885_2020_6522_MOESM2_ESM.xlsx]

## Sheet: Sample 2
Accession	Description	Score	Coverage	# Proteins	# Unique Peptides	# Peptides	# PSMs	# AAs	MW [kDa]	calc. pI
P02769	Serum albumin OS=Bos taurus GN=ALB PE=1 SV=4 - [ALBU_BOVIN]	43541.3	0.8797	2	80	82	1903	607	69.2	6.18
Q29443	Serotransferrin OS=Bos taurus GN=TF PE=2 SV=1 - [TRFE_BOVIN]	17467.8	0.8224	2	62	67	707	704	77.7	7.08
P12763	Alpha-2-HS-glycoprotein OS=Bos taurus GN=AHSG PE=1 SV=2 - [FETUA_BOVIN]	14982.1	0.5627	1	19	19	681	359	38.4	5.5
P00760	Cationic trypsin OS=Bos taurus PE=1 SV=3 - [TRY1_BOVIN]	12011.9	0.7073	2	16	16	618	246	25.8	8.07
Q7SIH1	Alpha-2-macroglobulin OS=Bos taurus GN=A2M PE=1 SV=2 - [A2MG_BOVIN]	11043.2	0.6026	4	70	70	508	1510	167.5	6.02
P34955	Alpha-1-antiproteinase OS=Bos taurus GN=SERPINA1 PE=1 SV=1 - [A1AT_BOVIN]	9391.98	0.5	1	23	23	447	416	46.1	6.52
Q76LV1	Heat shock protein HSP 90-beta OS=Bos taurus GN=HSP90AB1 PE=2 SV=3 - [HS90B_BOVIN]	5464.84	0.5691	6	27	48	300	724	83.2	5.03
Q76LV2	Heat shock protein HSP 90-alpha OS=Bos taurus GN=HSP90AA1 PE=1 SV=3 - [HS90A_BOVIN]	4779.48	0.5321	6	18	42	256	733	84.7	5.01
P19120	Heat shock cognate 71 kDa protein OS=Bos taurus GN=HSPA8 PE=1 SV=2 - [HSP7C_BOVIN]	5794.13	0.5077	14	19	31	239	650	71.2	5.52
G3HSL4	Elongation factor 2 OS=Cricetulus griseus GN=I79_013848 PE=4 SV=1 - [G3HSL4_CRIGR]	5434.61	0.5872	2	3	42	227	872	96.6	6.83
G3GVD0	Actin, cytoplasmic 1 OS=Cricetulus griseus GN=I79_001666 PE=3 SV=1 - [G3GVD0_CRIGR]	4504.83	0.752	4	1	26	220	375	41.7	5.48
P63258	Actin, cytoplasmic 2 OS=Bos taurus GN=ACTG1 PE=1 SV=1 - [ACTG_BOVIN]	4273.42	0.752	5	1	26	214	375	41.8	5.48
Q3SYU2	Elongation factor 2 OS=Bos taurus GN=EEF2 PE=2 SV=3 - [EF2_BOVIN]	4855.98	0.5664	2	1	40	212	858	95.3	6.83
G3IBK2	Filamin-A OS=Cricetulus griseus GN=I79_021027 PE=4 SV=1 - [G3IBK2_CRIGR]	4052.54	0.2894	1	49	50	208	2488	263.5	5.82
Q2UVX4	Complement C3 OS=Bos taurus GN=C3 PE=1 SV=2 - [CO3_BOVIN]	3112.67	0.3937	1	48	55	201	1661	187.1	6.84
G3H1K9	Alpha-actinin-1 OS=Cricetulus griseus GN=I79_004057 PE=4 SV=1 - [G3H1K9_CRIGR]	3669.31	0.4961	2	24	36	197	903	104.5	5.8
A5D7D1	Alpha-actinin-4 OS=Bos taurus GN=ACTN4 PE=2 SV=1 - [ACTN4_BOVIN]	4003	0.4962	3	18	38	185	911	104.9	5.44
Q9XSJ4	Alpha-enolase OS=Bos taurus GN=ENO1 PE=1 SV=4 - [ENOA_BOVIN]	4751.29	0.4793	9	7	22	175	434	47.3	6.8
Q3SZR3	Alpha-1-acid glycoprotein OS=Bos taurus GN=ORM1 PE=2 SV=1 - [A1AG_BOVIN]	3386.52	0.5099	2	14	14	172	202	23.2	5.87
G3HG95	Lamin-A/C OS=Cricetulus griseus GN=I79_009616 PE=3 SV=1 - [G3HG95_CRIGR]	2976.14	0.5115	1	31	31	169	563	64	8.02
G3I4H6	Fructose-bisphosphate aldolase OS=Cricetulus griseus GN=I79_018355 PE=3 SV=1 - [G3I4H6_CRIGR]	3409.15	0.6566	5	21	21	165	364	39.4	8.07
G3GY17	Cullin-associated NEDD8-dissociated protein 1 OS=Cricetulus griseus GN=I79_002670 PE=4 SV=1 - [G3GY17_CRIGR]	2758.49	0.3756	2	4	36	156	1206	133.5	5.74
G3HFM4	Filamin-B OS=Cricetulus griseus GN=I79_009386 PE=4 SV=1 - [G3HFM4_CRIGR]	2602.15	0.2106	2	35	36	152	2602	277.7	5.73
G3GSM5	Transferrin receptor protein 1 OS=Cricetulus griseus GN=I79_000642 PE=4 SV=1 - [G3GSM5_CRIGR]	2967.19	0.2827	1	21	21	151	757	85	6.77
G3I8R9	78 kDa glucose-regulated protein OS=Cricetulus griseus GN=I79_019946 PE=1 SV=1 - [G3I8R9_CRIGR]	3137.13	0.4373	2	23	25	148	654	72.3	5.16
A7MBJ5	Cullin-associated NEDD8-dissociated protein 1 OS=Bos taurus GN=CAND1 PE=2 SV=1 - [CAND1_BOVIN]	2690.91	0.3358	2	2	34	142	1230	136.3	5.78
G3IAQ0	Alpha-enolase OS=Cricetulus griseus GN=I79_020676 PE=3 SV=1 - [G3IAQ0_CRIGR]	4453.78	0.4056	6	1	16	139	429	46.7	6.16
G3IH98	Keratin, type II cytoskeletal 8 OS=Cricetulus griseus GN=I79_023186 PE=3 SV=1 - [G3IH98_CRIGR]	3559.27	0.4754	13	16	25	138	488	54.3	5.82
G3H3Q1	Pyruvate kinase OS=Cricetulus griseus GN=I79_004880 PE=3 SV=1 - [G3H3Q1_CRIGR]	2895.57	0.4979	4	15	25	137	472	51.5	7.68
P62261	14-3-3 protein epsilon OS=Bos taurus GN=YWHAE PE=2 SV=1 - [1433E_BOVIN]	2768.69	0.5608	3	13	16	134	255	29.2	4.74
Q3MHN5	Vitamin D-binding protein OS=Bos taurus GN=GC PE=2 SV=1 - [VTDB_BOVIN]	3263.32	0.616	2	27	27	134	474	53.3	5.52
P06868	Plasminogen OS=Bos taurus GN=PLG PE=1 SV=2 - [PLMN_BOVIN]	2177.71	0.4113	1	26	26	134	812	91.2	7.5
P49951	Clathrin heavy chain 1 OS=Bos taurus GN=CLTC PE=1 SV=1 - [CLH1_BOVIN]	2725.82	0.2716	2	33	33	131	1675	191.5	5.69
Q3MHM5	Tubulin beta-4B chain OS=Bos taurus GN=TUBB4B PE=2 SV=1 - [TBB4B_BOVIN]	3662.7	0.7124	4	4	24	125	445	49.8	4.89
G3IH63	Myosin-9 OS=Cricetulus griseus GN=I79_023145 PE=4 SV=1 - [G3IH63_CRIGR]	2238.56	0.2808	5	37	37	125	1948	225.7	5.58
P15497	Apolipoprotein A-I OS=Bos taurus GN=APOA1 PE=1 SV=3 - [APOA1_BOVIN]	2193.61	0.6717	1	23	23	124	265	30.3	5.97
G3IBN9	Keratin, type II cytoskeletal 71 OS=Cricetulus griseus GN=I79_021070 PE=3 SV=1 - [G3IBN9_CRIGR]	2872.09	0.2155	15	4	26	122	1202	133.3	6.55
G3HQP8	Tubulin beta-7 chain OS=Cricetulus griseus GN=I79_013153 PE=3 SV=1 - [G3HQP8_CRIGR]	3277.22	0.6486	2	2	22	119	444	49.6	4.89
Q2KJF1	Alpha-1B-glycoprotein OS=Bos taurus GN=A1BG PE=1 SV=1 - [A1BG_BOVIN]	2276.43	0.4573	1	16	16	117	503	53.5	5.43
G3GR73	Rab GDP dissociation inhibitor beta OS=Cricetulus griseus GN=I79_000016 PE=4 SV=1 - [G3GR73_CRIGR]	1889.14	0.6719	1	13	25	117	445	50.5	6.25
G3GXD7	Fatty acid synthase OS=Cricetulus griseus GN=I79_002427 PE=4 SV=1 - [G3GXD7_CRIGR]	2088.68	0.1326	2	29	29	116	2503	271.7	6.38
G3GUU5	Transketolase OS=Cricetulus griseus GN=I79_001469 PE=3 SV=1 - [G3GUU5_CRIGR]	2422.5	0.4462	1	17	23	116	623	67.7	7.64
G3I8F7	Keratin, type I cytoskeletal 19 OS=Cricetulus griseus GN=I79_019825 PE=3 SV=1 - [G3I8F7_CRIGR]	1736.53	0.4516	10	13	23	115	403	44.4	5.25
G3HGW6	Laminin subunit alpha-5 OS=Cricetulus griseus GN=I79_009858 PE=4 SV=1 - [G3HGW6_CRIGR]	2287.53	0.0956	2	25	25	112	3735	405.6	6.9
G3IDL7	Heat shock cognate 71 kDa protein OS=Cricetulus griseus GN=I79_021800 PE=3 SV=1 - [G3IDL7_CRIGR]	2920.57	0.6316	1	1	13	110	209	22.7	5.44
Q3SZ62	Phosphoglycerate mutase 1 OS=Bos taurus GN=PGAM1 PE=2 SV=3 - [PGAM1_BOVIN]	1778.39	0.5472	3	4	14	109	254	28.8	7.18
G3HWC3	Ezrin OS=Cricetulus griseus GN=I79_015278 PE=4 SV=1 - [G3HWC3_CRIGR]	1786.05	0.4386	2	13	24	108	586	69.3	6.37
G3H0U6	Protein disulfide-isomerase A3 OS=Cricetulus griseus GN=I79_003765 PE=4 SV=1 - [G3H0U6_CRIGR]	1944.19	0.3829	1	14	18	107	444	50	5.71
Q2HJ49	Moesin OS=Bos taurus GN=MSN PE=2 SV=3 - [MOES_BOVIN]	1303.84	0.4281	1	7	27	106	577	67.9	6.16
G3HN02	Talin-1 OS=Cricetulus griseus GN=I79_012132 PE=3 SV=1 - [G3HN02_CRIGR]	1775.72	0.1747	2	18	26	106	1849	199	5.33
G3I9X8	Spectrin alpha chain, brain OS=Cricetulus griseus GN=I79_020389 PE=4 SV=1 - [G3I9X8_CRIGR]	2039.72	0.19	1	30	30	106	2253	258.7	5.4
Q3SZV7	Hemopexin OS=Bos taurus GN=HPX PE=2 SV=1 - [HEMO_BOVIN]	1280.84	0.5664	1	20	20	104	459	52.2	7.8
Q3ZBT1	Transitional endoplasmic reticulum ATPase OS=Bos taurus GN=VCP PE=2 SV=1 - [TERA_BOVIN]	2686.29	0.4578	3	27	27	104	806	89.3	5.26
Q3ZC09	Beta-enolase OS=Bos taurus GN=ENO3 PE=2 SV=1 - [ENOB_BOVIN]	3277.04	0.5138	3	9	17	103	434	47.1	7.72
G3HYB7	T-complex protein 1 subunit eta OS=Cricetulus griseus GN=I79_016041 PE=3 SV=1 - [G3HYB7_CRIGR]	2125.76	0.491	2	2	21	103	499	54.9	7.42
Q32L40	T-complex protein 1 subunit alpha OS=Bos taurus GN=TCP1 PE=1 SV=1 - [TCPA_BOVIN]	1509.78	0.4227	1	2	19	99	556	60.2	6.11
G3H5Q0	Actin, alpha cardiac muscle 1 OS=Cricetulus griseus GN=I79_005636 PE=3 SV=1 - [G3H5Q0_CRIGR]	1507.66	0.2918	8	2	14	98	377	42	5.39
G3I8G0	Keratin, type I cytoskeletal 17 OS=Cricetulus griseus GN=I79_019831 PE=3 SV=1 - [G3I8G0_CRIGR]	1484.49	0.3426	9	3	18	98	432	48	5.06
P06394	Keratin, type I cytoskeletal 10 OS=Bos taurus GN=KRT10 PE=3 SV=1 - [K1C10_BOVIN]	2014.42	0.1787	8	5	14	97	526	54.8	5.11
G3HGP6	T-complex protein 1 subunit alpha OS=Cricetulus griseus GN=I79_009786 PE=3 SV=1 - [G3HGP6_CRIGR]	1599.8	0.4568	1	3	20	97	556	60.3	5.99
G3H5V0	Importin subunit beta-1 OS=Cricetulus griseus GN=I79_005692 PE=4 SV=1 - [G3H5V0_CRIGR]	2147.31	0.1568	1	25	25	97	1894	211.1	4.87
G3I255	L-lactate dehydrogenase OS=Cricetulus griseus GN=I79_017480 PE=3 SV=1 - [G3I255_CRIGR]	2164.83	0.5157	8	16	17	97	382	42.1	8.43
G3I6I6	Tubulin alpha-1A chain OS=Cricetulus griseus GN=I79_019110 PE=3 SV=1 - [G3I6I6_CRIGR]	2008.01	0.4878	16	5	18	96	451	50.1	5.06
G3IKI6	Keratin, type II cytoskeletal 1b OS=Cricetulus griseus GN=I79_024389 PE=3 SV=1 - [G3IKI6_CRIGR]	2277.35	0.103	1	3	9	96	835	93.4	5.45
Q3T052	Inter-alpha-trypsin inhibitor heavy chain H4 OS=Bos taurus GN=ITIH4 PE=1 SV=1 - [ITIH4_BOVIN]	1936.13	0.3843	1	25	25	95	916	101.4	6.68
Q5KR47-2	Isoform 2 of Tropomyosin alpha-3 chain OS=Bos taurus GN=TPM3 - [TPM3_BOVIN]	1334.84	0.5887	2	10	21	94	248	29	4.78
G3IEG6	Tubulin beta-2A chain OS=Cricetulus griseus GN=I79_022113 PE=3 SV=1 - [G3IEG6_CRIGR]	2613.11	0.4989	4	1	18	94	445	49.9	4.96
G3GZW8	Phosphoglycerate mutase 1 OS=Cricetulus griseus GN=I79_003415 PE=4 SV=1 - [G3GZW8_CRIGR]	1413.02	0.7416	3	3	13	92	178	20.2	8.12
A1L595	Keratin, type I cytoskeletal 17 OS=Bos taurus GN=KRT17 PE=2 SV=1 - [K1C17_BOVIN]	1491.45	0.3243	9	2	17	91	441	48.7	5.15
Q3ZCI9	T-complex protein 1 subunit theta OS=Bos taurus GN=CCT8 PE=1 SV=3 - [TCPQ_BOVIN]	2294.19	0.3631	1	6	18	91	548	59.6	5.59
Q2NKZ1	T-complex protein 1 subunit eta OS=Bos taurus GN=CCT7 PE=1 SV=1 - [TCPH_BOVIN]	1992.38	0.4291	2	1	20	91	543	59.4	7.2
G3IDM2	Cofilin-1 OS=Cricetulus griseus GN=I79_021805 PE=4 SV=1 - [G3IDM2_CRIGR]	1922.93	0.6867	3	14	14	89	166	18.5	8.09
G3HNJ3	Clusterin OS=Cricetulus griseus GN=I79_012331 PE=3 SV=1 - [G3HNJ3_CRIGR]	1587.95	0.2237	1	13	13	89	447	51.7	5.74
G3IEY9	14-3-3 protein theta OS=Cricetulus griseus GN=I79_022299 PE=3 SV=1 - [G3IEY9_CRIGR]	2360.7	0.498	5	13	16	89	245	27.7	4.78
G3HIQ1	Peptidyl-prolyl cis-trans isomerase OS=Cricetulus griseus GN=I79_010526 PE=3 SV=1 - [G3HIQ1_CRIGR]	1286.87	0.5976	11	4	10	89	164	17.9	8.28
P81187	Complement factor B OS=Bos taurus GN=CFB PE=1 SV=2 - [CFAB_BOVIN]	1103.55	0.3482	2	19	19	88	761	85.3	7.68
G3GTX5	Amyloid-like protein 2 OS=Cricetulus griseus GN=I79_001115 PE=4 SV=1 - [G3GTX5_CRIGR]	1490.68	0.2669	1	18	18	88	682	78.3	4.86
G3IBL4	Glucose-6-phosphate 1-dehydrogenase OS=Cricetulus griseus GN=I79_021040 PE=3 SV=1 - [G3IBL4_CRIGR]	1636.2	0.3349	1	16	16	88	624	71.3	6.51
Q32PF2	ATP-citrate synthase OS=Bos taurus GN=ACLY PE=2 SV=1 - [ACLY_BOVIN]	1868.9	0.3098	4	12	25	86	1091	119.7	7.24
G3HKZ1	14-3-3 protein zeta/delta OS=Cricetulus griseus GN=I79_011374 PE=3 SV=1 - [G3HKZ1_CRIGR]	2158.43	0.4898	3	9	12	85	245	27.7	4.79
G3I8F9	Keratin, type I cytoskeletal 14 OS=Cricetulus griseus GN=I79_019828 PE=3 SV=1 - [G3I8F9_CRIGR]	1430.37	0.3395	11	7	19	85	483	52.6	5.16
G3IBG3	Ubiquitin activating enzyme E1 OS=Cricetulus griseus GN=Uba1 PE=2 SV=1 - [G3IBG3_CRIGR]	2455.18	0.2911	1	11	23	85	1058	117.6	5.66
G3H354	Heat shock protein HSP 90-alpha OS=Cricetulus griseus GN=I79_004665 PE=4 SV=1 - [G3H354_CRIGR]	2382.14	0.4488	1	1	17	84	332	38.1	4.67
G3H4I2	Tropomyosin beta chain OS=Cricetulus griseus GN=I79_005183 PE=3 SV=1 - [G3H4I2_CRIGR]	991.98	0.4151	3	6	16	84	265	30.7	4.82
Q3MHL3	Histone-binding protein RBBP4 OS=Bos taurus GN=RBBP4 PE=1 SV=3 - [RBBP4_BOVIN]	1278.34	0.3365	6	7	12	83	425	47.6	4.89
P05307	Protein disulfide-isomerase OS=Bos taurus GN=P4HB PE=1 SV=1 - [PDIA1_BOVIN]	1337.06	0.3	4	14	18	83	510	57.2	4.91
P63243	Guanine nucleotide-binding protein subunit beta-2-like 1 OS=Bos taurus GN=GNB2L1 PE=2 SV=3 - [GBLP_BOVIN]	1511.33	0.6183	2	17	17	82	317	35.1	7.69
Q5XQN5	Keratin, type II cytoskeletal 5 OS=Bos taurus GN=KRT5 PE=1 SV=1 - [K2C5_BOVIN]	2076.18	0.2978	10	2	20	82	601	62.9	7.81
G3HEY9	Catenin alpha-1 OS=Cricetulus griseus GN=I79_009138 PE=4 SV=1 - [G3HEY9_CRIGR]	2171	0.3543	4	19	19	82	906	100	6.29
G3HBD4	Nucleoside diphosphate kinase OS=Cricetulus griseus GN=I79_007762 PE=3 SV=1 - [G3HBD4_CRIGR]	1466.91	0.7632	3	9	11	81	152	17.2	6.33
G3HWE9	Tubulin alpha-4A chain OS=Cricetulus griseus GN=I79_015306 PE=3 SV=1 - [G3HWE9_CRIGR]	1428.01	0.4411	10	3	16	80	433	48.3	5.01
G3H7K5	T-complex protein 1 subunit epsilon OS=Cricetulus griseus GN=I79_006338 PE=3 SV=1 - [G3H7K5_CRIGR]	901.57	0.4362	1	17	18	80	541	59.5	5.5
G3I877	Stress-induced-phosphoprotein 1 OS=Cricetulus griseus GN=I79_019739 PE=4 SV=1 - [G3I877_CRIGR]	1157.72	0.4291	1	9	22	80	543	62.6	6.8
G3HIM1	Basement membrane-specific heparan sulfate proteoglycan core protein OS=Cricetulus griseus GN=I79_010495 PE=4 SV=1 - [G3HIM1_CRIGR]	1719.52	0.1073	1	19	19	79	3140	333.9	6.87
G3HL13	60 kDa heat shock protein, mitochondrial OS=Cricetulus griseus GN=I79_011398 PE=3 SV=1 - [G3HL13_CRIGR]	1871.83	0.2985	5	15	15	78	526	56.5	7.31
Q3SZ54	Eukaryotic initiation factor 4A-I OS=Bos taurus GN=EIF4A1 PE=2 SV=1 - [IF4A1_BOVIN]	1584.79	0.4606	3	15	18	77	406	46.1	5.48
Q9TTE1	Serpin A3-1 OS=Bos taurus GN=SERPINA3-1 PE=1 SV=3 - [SPA31_BOVIN]	1731.29	0.4647	2	7	17	77	411	46.2	5.99
G3GYP9	Peroxiredoxin-1 OS=Cricetulus griseus GN=I79_002954 PE=4 SV=1 - [G3GYP9_CRIGR]	1582.19	0.4874	1	6	13	76	199	22.2	7.72
P10103	High mobility group protein B1 OS=Bos taurus GN=HMGB1 PE=1 SV=3 - [HMGB1_BOVIN]	726.37	0.4512	11	11	13	75	215	24.9	5.74
Q5E956	Triosephosphate isomerase OS=Bos taurus GN=TPI1 PE=2 SV=3 - [TPIS_BOVIN]	1857.8	0.5341	2	6	13	75	249	26.7	6.92
G3HN88	Adenylyl cyclase-associated protein OS=Cricetulus griseus GN=I79_012224 PE=3 SV=1 - [G3HN88_CRIGR]	1921.88	0.4726	2	10	18	75	474	51.5	7.28
P01044-2	Isoform LMW of Kininogen-1 OS=Bos taurus GN=KNG1 - [KNG1_BOVIN]	1140.8	0.422	2	9	16	74	436	48.4	6.3
G3I278	Laminin subunit beta-1 OS=Cricetulus griseus GN=I79_017505 PE=4 SV=1 - [G3I278_CRIGR]	1190.66	0.1429	3	19	20	74	1617	178	4.88
G3HCX8	Calreticulin OS=Cricetulus griseus GN=I79_008346 PE=3 SV=1 - [G3HCX8_CRIGR]	1228.19	0.4077	3	12	12	74	417	48.2	4.49
G3H2N6	Programmed cell death 6-interacting protein OS=Cricetulus griseus GN=I79_004454 PE=4 SV=1 - [G3H2N6_CRIGR]	1498.09	0.3114	1	20	20	74	867	95.9	6.39
G3IF62	Ras GTPase-activating-like protein IQGAP1 OS=Cricetulus griseus GN=I79_022378 PE=4 SV=1 - [G3IF62_CRIGR]	1505.47	0.1528	3	19	19	73	1675	191.3	6.64
G3IH97	Keratin, type I cytoskeletal 18 OS=Cricetulus griseus GN=I79_023185 PE=3 SV=1 - [G3IH97_CRIGR]	1003.63	0.4439	8	17	19	73	437	49.1	5.33
G3H412	Proliferating cell nuclear antigen OS=Cricetulus griseus GN=I79_005005 PE=3 SV=1 - [G3H412_CRIGR]	1287.98	0.5249	2	13	13	73	261	28.8	4.69
P61286	Polyadenylate-binding protein 1 OS=Bos taurus GN=PABPC1 PE=2 SV=1 - [PABP1_BOVIN]	1506.64	0.2704	7	8	15	72	636	70.6	9.5
P68103	Elongation factor 1-alpha 1 OS=Bos taurus GN=EEF1A1 PE=2 SV=1 - [EF1A1_BOVIN]	1378.27	0.5671	6	4	15	72	462	50.1	9.01
P02584	Profilin-1 OS=Bos taurus GN=PFN1 PE=1 SV=2 - [PROF1_BOVIN]	1750.14	0.4571	4	4	8	72	140	15	8.28
G3H2C4	Heat shock 70 kDa protein 4 (Fragment) OS=Cricetulus griseus GN=I79_004332 PE=4 SV=1 - [G3H2C4_CRIGR]	1090.89	0.3488	2	15	16	72	559	63	5.08
G3HG25	Laminin subunit gamma-1 OS=Cricetulus griseus GN=I79_009544 PE=4 SV=1 - [G3HG25_CRIGR]	2138.26	0.1892	1	19	19	71	1559	172	5.07
G3IDU7	Beta-glucuronidase OS=Cricetulus griseus GN=I79_021884 PE=4 SV=1 - [G3IDU7_CRIGR]	670.78	0.1497	1	9	9	71	648	74.8	6.76
Q58D62	Fetuin-B OS=Bos taurus GN=FETUB PE=2 SV=1 - [FETUB_BOVIN]	1079.9	0.447	1	15	15	70	387	42.6	5.77
P04272	Annexin A2 OS=Bos taurus GN=ANXA2 PE=1 SV=2 - [ANXA2_BOVIN]	1835.71	0.531	1	6	17	70	339	38.6	7.31
G3I064	Neutral alpha-glucosidase AB OS=Cricetulus griseus GN=I79_016741 PE=4 SV=1 - [G3I064_CRIGR]	1042.69	0.1981	1	16	16	70	944	106.9	6.02
G3HNY5	Phosphoglycerate kinase OS=Cricetulus griseus GN=I79_012486 PE=3 SV=1 - [G3HNY5_CRIGR]	1771.86	0.6612	2	4	11	69	242	25.5	5.78
G3GYC6	Profilin-1 OS=Cricetulus griseus GN=I79_002801 PE=4 SV=1 - [G3GYC6_CRIGR]	1284.87	0.6545	1	1	5	69	55	6	9.88
G3HRK0	Proliferation-associated protein 2G4 OS=Cricetulus griseus GN=I79_013505 PE=4 SV=1 - [G3HRK0_CRIGR]	915.67	0.401	1	14	14	69	394	43.7	6.7
P68252	14-3-3 protein gamma OS=Bos taurus GN=YWHAG PE=1 SV=2 - [1433G_BOVIN]	1562.86	0.6194	4	9	14	68	247	28.2	4.89
Q3SWX8	Histone-binding protein RBBP7 OS=Bos taurus GN=RBBP7 PE=2 SV=1 - [RBBP7_BOVIN]	1174.47	0.2047	3	4	9	68	425	47.8	5.05
G3GZE6	Actin-related protein 3 OS=Cricetulus griseus GN=I79_003209 PE=3 SV=1 - [G3GZE6_CRIGR]	1427.37	0.5048	3	15	15	67	418	47.3	5.88
Q5E9F5	Transgelin-2 OS=Bos taurus GN=TAGLN2 PE=2 SV=3 - [TAGL2_BOVIN]	1902.07	0.5477	1	4	11	67	199	22.4	8.24
Q2T9X2	T-complex protein 1 subunit delta OS=Bos taurus GN=CCT4 PE=1 SV=3 - [TCPD_BOVIN]	1116.72	0.2565	1	7	12	67	542	58.2	7.33
G3HA23	Malate dehydrogenase (Fragment) OS=Cricetulus griseus GN=I79_007263 PE=4 SV=1 - [G3HA23_CRIGR]	1496.65	0.6568	2	13	13	66	271	28.7	8.81
G3HZ42	T-complex protein 1 subunit beta OS=Cricetulus griseus GN=I79_016337 PE=3 SV=1 - [G3HZ42_CRIGR]	1670.07	0.5159	1	4	19	65	535	57.5	6.46
G3HES3	Exportin-2 OS=Cricetulus griseus GN=I79_009067 PE=4 SV=1 - [G3HES3_CRIGR]	1098.6	0.206	2	15	15	65	971	110.3	5.77
G3GU60	Phosphatidylethanolamine-binding protein 1 OS=Cricetulus griseus GN=I79_001211 PE=4 SV=1 - [G3GU60_CRIGR]	1303.53	0.8128	2	12	12	65	187	20.9	7.11
G3I437	Agrin OS=Cricetulus griseus GN=I79_018184 PE=4 SV=1 - [G3I437_CRIGR]	1790.69	0.141	1	19	19	63	2036	217	5.8
G3IBP3	Keratin, type II cytoskeletal 2 epidermal OS=Cricetulus griseus GN=I79_021074 PE=3 SV=1 - [G3IBP3_CRIGR]	1401.35	0.1746	3	3	10	63	441	45.9	8.13
G3GUV4	Stromelysin-2 OS=Cricetulus griseus GN=I79_001478 PE=4 SV=1 - [G3GUV4_CRIGR]	950.27	0.118	1	13	13	63	966	107.6	6.2
Q32PI5	Serine/threonine-protein phosphatase 2A 65 kDa regulatory subunit A alpha isoform OS=Bos taurus GN=PPP2R1A PE=1 SV=1 - [2AAA_BOVIN]	1413.59	0.326	2	2	15	62	589	65.2	5.15
G3IBK9	Rab GDP dissociation inhibitor alpha OS=Cricetulus griseus GN=I79_021035 PE=4 SV=1 - [G3IBK9_CRIGR]	831.22	0.3506	1	6	13	62	425	48.1	5.4
G3I1V4	Bifunctional purine biosynthesis protein PURH OS=Cricetulus griseus GN=I79_017373 PE=4 SV=1 - [G3I1V4_CRIGR]	1116.69	0.3953	2	17	17	62	592	64.6	6.98
G3HWJ3	Putative uncharacterized protein OS=Cricetulus griseus GN=I79_015376 PE=4 SV=1 - [G3HWJ3_CRIGR]	779.2	0.1525	2	24	24	62	2072	231.1	5.55
G3H7Z2	Transgelin-2 OS=Cricetulus griseus GN=I79_006488 PE=4 SV=1 - [G3H7Z2_CRIGR]	1786.73	0.598	1	4	11	62	199	22.4	8.57
G3HJB1	Alpha-actinin-4 OS=Cricetulus griseus GN=I79_010753 PE=4 SV=1 - [G3HJB1_CRIGR]	1351.45	0.6111	1	1	11	62	234	26.2	4.82
A2I7N0	Serpin A3-4 OS=Bos taurus GN=SERPINA3-4 PE=3 SV=1 - [SPA34_BOVIN]	1018.54	0.2798	4	1	12	61	411	46.3	6.32
G3GZG6	Serotransferrin OS=Cricetulus griseus GN=I79_003225 PE=4 SV=1 - [G3GZG6_CRIGR]	1018.65	0.1035	1	10	15	61	1227	134.5	7.28
G3H2M7	Laminin subunit beta-3 OS=Cricetulus griseus GN=I79_004442 PE=4 SV=1 - [G3H2M7_CRIGR]	1431.31	0.1775	1	17	17	61	1166	127.9	7.24
G3GZR1	Aspartyl-tRNA synthetase, cytoplasmic OS=Cricetulus griseus GN=I79_003356 PE=3 SV=1 - [G3GZR1_CRIGR]	971.12	0.3299	2	4	15	61	479	54.4	6.38
G3IHY5	6-phosphogluconate dehydrogenase, decarboxylating OS=Cricetulus griseus GN=I79_023445 PE=3 SV=1 - [G3IHY5_CRIGR]	1013.03	0.2008	1	10	10	61	483	53.3	6.61
G3HZ55	Integrin beta OS=Cricetulus griseus GN=I79_016350 PE=3 SV=1 - [G3HZ55_CRIGR]	1233.27	0.1817	3	13	13	61	798	88.3	5.78
G3GWP9	Urokinase-type plasminogen activator OS=Cricetulus griseus GN=I79_002178 PE=3 SV=1 - [G3GWP9_CRIGR]	1062.02	0.0932	1	3	3	61	397	44.3	8.06
P17690	Beta-2-glycoprotein 1 OS=Bos taurus GN=APOH PE=1 SV=4 - [APOH_BOVIN]	1288.75	0.4667	1	11	11	60	345	38.2	8.15
Q3T0K2	T-complex protein 1 subunit gamma OS=Bos taurus GN=CCT3 PE=1 SV=1 - [TCPG_BOVIN]	1090.06	0.5413	2	21	21	60	545	60.5	6.8
G3I3F3	Ribonuclease inhibitor OS=Cricetulus griseus GN=I79_017958 PE=4 SV=1 - [G3I3F3_CRIGR]	1204.44	0.3728	1	12	12	60	456	50	4.84
G3HAN8	Adenosylhomocysteinase OS=Cricetulus griseus GN=I79_007494 PE=3 SV=1 - [G3HAN8_CRIGR]	1031.77	0.412	3	15	15	60	432	47.6	6.54
Q0P569	Nucleobindin-1 OS=Bos taurus GN=NUCB1 PE=2 SV=1 - [NUCB1_BOVIN]	850.99	0.365	2	16	16	59	474	54.9	5.21
G3I4N3	Lysine--tRNA ligase OS=Cricetulus griseus GN=I79_018416 PE=3 SV=1 - [G3I4N3_CRIGR]	763.63	0.1741	1	14	14	59	626	71.4	6.62
G3HH39	Elongation factor 1-alpha 1 OS=Cricetulus griseus GN=I79_009935 PE=4 SV=1 - [G3HH39_CRIGR]	1071.85	0.4513	4	1	12	59	503	55.1	9.33
G3IG05	Annexin OS=Cricetulus griseus GN=I79_022682 PE=3 SV=1 - [G3IG05_CRIGR]	1609.03	0.4877	1	2	13	58	244	27	5.97
G3IBN8	Keratin, type II cytoskeletal 6A OS=Cricetulus griseus GN=I79_021069 PE=3 SV=1 - [G3IBN8_CRIGR]	1499.88	0.1794	6	3	10	58	457	48.5	7.99
G3IKI7	Keratin, type II cytoskeletal 2 oral OS=Cricetulus griseus GN=I79_024390 PE=4 SV=1 - [G3IKI7_CRIGR]	1296.68	0.0855	8	1	7	58	655	67.8	7.78
G3HFP1	Radixin OS=Cricetulus griseus GN=I79_009404 PE=4 SV=1 - [G3HFP1_CRIGR]	652.08	0.2333	2	3	15	58	583	68.5	6.27
Q3T0P6	Phosphoglycerate kinase 1 OS=Bos taurus GN=PGK1 PE=2 SV=3 - [PGK1_BOVIN]	1510.1	0.3789	3	1	15	57	417	44.5	8.27
Q3ZBH0	T-complex protein 1 subunit beta OS=Bos taurus GN=CCT2 PE=1 SV=3 - [TCPB_BOVIN]	1663.38	0.3925	1	1	16	57	535	57.4	6.64
G3H533	Peptidyl-prolyl cis-trans isomerase OS=Cricetulus griseus GN=I79_005402 PE=3 SV=1 - [G3H533_CRIGR]	744.05	0.5139	4	10	11	57	216	23.6	9.58
G3IAX3	Pyruvate kinase OS=Cricetulus griseus GN=I79_020755 PE=3 SV=1 - [G3IAX3_CRIGR]	1396.49	0.2863	3	1	11	57	461	50.4	7.81
G3H8V5	Lysosomal protective protein OS=Cricetulus griseus GN=I79_006816 PE=4 SV=1 - [G3H8V5_CRIGR]	1189.73	0.1558	1	9	9	57	475	54.2	6.11
G3HYJ9	Moesin OS=Cricetulus griseus GN=I79_016134 PE=4 SV=1 - [G3HYJ9_CRIGR]	971.67	0.4778	1	3	14	57	293	34.5	5.66
G3GY22	Ras-related protein Rap-1b OS=Cricetulus griseus GN=I79_002677 PE=4 SV=1 - [G3GY22_CRIGR]	1552.41	0.6304	2	11	11	56	184	20.8	5.78
Q58DU5	Proteasome subunit alpha type-3 OS=Bos taurus GN=PSMA3 PE=1 SV=3 - [PSA3_BOVIN]	1049.23	0.3882	1	1	9	56	255	28.4	5.33
G3IED5	Peptidyl-prolyl cis-trans isomerase A OS=Cricetulus griseus GN=I79_022082 PE=4 SV=1 - [G3IED5_CRIGR]	770.23	0.1945	9	1	7	56	401	44.9	9.54
O77656	Collagenase 3 OS=Bos taurus GN=MMP13 PE=2 SV=1 - [MMP13_BOVIN]	800.09	0.1083	1	5	6	56	471	53.9	5.68
P62157	Calmodulin OS=Bos taurus GN=CALM PE=1 SV=2 - [CALM_BOVIN]	1369.25	0.557	5	7	7	55	149	16.8	4.22
Q3T054	GTP-binding nuclear protein Ran OS=Bos taurus GN=RAN PE=2 SV=3 - [RAN_BOVIN]	723.9	0.4861	5	11	11	55	216	24.4	7.49
P05786	Keratin, type II cytoskeletal 8 OS=Bos taurus GN=KRT8 PE=2 SV=3 - [K2C8_BOVIN]	1274.97	0.1778	5	1	10	55	478	53.6	5.69
Q5KR47	Tropomyosin alpha-3 chain OS=Bos taurus GN=TPM3 PE=2 SV=1 - [TPM3_BOVIN]	515.87	0.419	2	1	13	55	284	32.8	4.72
P10096	Glyceraldehyde-3-phosphate dehydrogenase OS=Bos taurus GN=GAPDH PE=1 SV=4 - [G3P_BOVIN]	1580.66	0.2883	6	2	7	55	333	35.8	8.35
Q3T0D0	Heterogeneous nuclear ribonucleoprotein K OS=Bos taurus GN=HNRNPK PE=2 SV=1 - [HNRPK_BOVIN]	1369.3	0.3319	1	3	12	55	464	51	5.26
G3I2M1	T-complex protein 1 subunit zeta OS=Cricetulus griseus GN=I79_017661 PE=3 SV=1 - [G3I2M1_CRIGR]	1152.86	0.322	3	2	14	55	531	57.9	6.9
G3HBD3	Nucleoside diphosphate kinase OS=Cricetulus griseus GN=I79_007761 PE=3 SV=1 - [G3HBD3_CRIGR]	1144.16	0.7829	1	8	10	55	152	17.3	7.99
P68250	14-3-3 protein beta/alpha OS=Bos taurus GN=YWHAB PE=1 SV=2 - [1433B_BOVIN]	1066.25	0.4431	2	2	12	54	246	28.1	4.87
A1A4K3	DNA damage-binding protein 1 OS=Bos taurus GN=DDB1 PE=2 SV=1 - [DDB1_BOVIN]	614.75	0.1561	2	14	14	54	1140	126.8	5.26
G3H2T7	Histone H3 OS=Cricetulus griseus GN=I79_004539 PE=3 SV=1 - [G3H2T7_CRIGR]	909.44	0.4607	11	3	9	54	267	29.6	11.11
G3HLS2	14-3-3 protein beta/alpha OS=Cricetulus griseus GN=I79_011666 PE=3 SV=1 - [G3HLS2_CRIGR]	1035.18	0.4385	3	1	11	53	244	27.8	4.83
Q08D91	Keratin, type II cytoskeletal 75 OS=Bos taurus GN=KRT75 PE=2 SV=1 - [K2C75_BOVIN]	1183.03	0.1289	10	1	9	53	543	59	7.65
G3I9G7	Proteasome subunit alpha type OS=Cricetulus griseus GN=I79_020214 PE=3 SV=1 - [G3I9G7_CRIGR]	1018.08	0.3309	1	1	9	53	269	29.4	6.8
P00735	Prothrombin OS=Bos taurus GN=F2 PE=1 SV=2 - [THRB_BOVIN]	883.36	0.3024	6	14	14	52	625	70.5	6.33
Q3SYW6	Eukaryotic translation initiation factor 3 subunit C OS=Bos taurus GN=EIF3C PE=2 SV=1 - [EIF3C_BOVIN]	1046.82	0.1327	3	10	10	52	912	105.3	5.81
G3ID81	Beta-actin-like protein 2 OS=Cricetulus griseus GN=I79_021654 PE=3 SV=1 - [G3ID81_CRIGR]	986.61	0.2766	3	1	8	52	376	42.1	5.48
Q3SYZ4	Aspartate--tRNA ligase, cytoplasmic OS=Bos taurus GN=DARS PE=2 SV=1 - [SYDC_BOVIN]	773.6	0.3134	1	3	14	52	501	57	6.84
G3GW47	Arginyl-tRNA synthetase, cytoplasmic OS=Cricetulus griseus GN=I79_001963 PE=3 SV=1 - [G3GW47_CRIGR]	842.41	0.2122	1	8	11	52	542	62	6.62
P41361	Antithrombin-III OS=Bos taurus GN=SERPINC1 PE=1 SV=2 - [ANT3_BOVIN]	1026.23	0.3161	1	9	12	51	465	52.3	7.33
G3GT05	T-complex protein 1 subunit theta OS=Cricetulus griseus GN=I79_000778 PE=3 SV=1 - [G3GT05_CRIGR]	1736.87	0.5171	1	1	8	51	205	22.2	4.91
G3HIQ0	Threonyl-tRNA synthetase, cytoplasmic OS=Cricetulus griseus GN=I79_010525 PE=3 SV=1 - [G3HIQ0_CRIGR]	722.05	0.1662	3	11	12	51	722	83.4	7.02
A7MB62	Actin-related protein 2 OS=Bos taurus GN=ACTR2 PE=1 SV=1 - [ARP2_BOVIN]	519.08	0.3401	20	11	12	50	394	44.7	6.74
Q3ZBZ8	Stress-induced-phosphoprotein 1 OS=Bos taurus GN=STIP1 PE=2 SV=1 - [STIP1_BOVIN]	854.93	0.2818	1	1	14	50	543	62.4	6.43
A2I7N1	Serpin A3-5 OS=Bos taurus GN=SERPINA3-5 PE=3 SV=1 - [SPA35_BOVIN]	860.11	0.2336	2	1	11	50	411	46.4	6.96
Q3MHL7	T-complex protein 1 subunit zeta OS=Bos taurus GN=CCT6A PE=1 SV=3 - [TCPZ_BOVIN]	1175.93	0.339	2	2	14	50	531	57.9	6.76
G3GWQ1	Vinculin OS=Cricetulus griseus GN=I79_002180 PE=4 SV=1 - [G3GWQ1_CRIGR]	970.94	0.1995	1	17	17	50	1143	124.8	5.58
G3IAS8	Kinesin-like protein KIF27 OS=Cricetulus griseus GN=I79_020709 PE=3 SV=1 - [G3IAS8_CRIGR]	1209.27	0.0661	1	1	10	50	1648	185.6	6.51
G3I1S5	Glyceraldehyde-3-phosphate dehydrogenase OS=Cricetulus griseus GN=I79_017344 PE=3 SV=1 - [G3I1S5_CRIGR]	1080.79	0.3096	6	2	5	50	197	21.2	6.19
G3II08	Keratin, type II cytoskeletal 7 OS=Cricetulus griseus GN=I79_023469 PE=4 SV=1 - [G3II08_CRIGR]	875.57	0.2669	9	6	11	50	341	38.6	5.34
G3I2B6	Serine/threonine-protein phosphatase 2A 65 kDa regulatory subunit A alpha isoform (Fragment) OS=Cricetulus griseus GN=I79_017545 PE=4 SV=1 - [G3I2B6_CRIGR]	968.11	0.3801	1	2	15	50	534	59	5.14
G3HNV4	Triosephosphate isomerase OS=Cricetulus griseus GN=I79_012448 PE=3 SV=1 - [G3HNV4_CRIGR]	832.78	0.32	1	2	7	50	150	16.4	8.19
Q6EWQ7	Eukaryotic translation initiation factor 5A-1 OS=Bos taurus GN=EIF5A PE=2 SV=3 - [IF5A1_BOVIN]	912.01	0.6169	4	11	11	49	154	16.8	5.24
G3IKH9	Phosphoserine aminotransferase OS=Cricetulus griseus GN=I79_024382 PE=3 SV=1 - [G3IKH9_CRIGR]	1065.08	0.3592	1	11	11	49	309	33.9	7.97
G3HBI1	Peroxidasin-like OS=Cricetulus griseus GN=I79_007809 PE=4 SV=1 - [G3HBI1_CRIGR]	960.5	0.1024	1	10	10	49	1475	165.3	7.05
G3HH30	Aldose reductase OS=Cricetulus griseus GN=I79_009926 PE=4 SV=1 - [G3HH30_CRIGR]	790	0.4272	1	10	11	49	316	35.8	7.4
G3GUQ0	Gamma-enolase OS=Cricetulus griseus GN=I79_001417 PE=3 SV=1 - [G3GUQ0_CRIGR]	1201.26	0.1659	2	1	6	49	434	47.2	5.07
G3I216	Triosephosphate isomerase OS=Cricetulus griseus GN=I79_017439 PE=3 SV=1 - [G3I216_CRIGR]	1141.45	0.4118	1	1	9	49	187	20.4	8.66
Q28085	Complement factor H OS=Bos taurus GN=CFH PE=1 SV=3 - [CFAH_BOVIN]	642.98	0.1578	1	14	14	48	1236	140.3	6.81
G3H935	Tyrosyl-tRNA synthetase, cytoplasmic OS=Cricetulus griseus GN=I79_006897 PE=4 SV=1 - [G3H935_CRIGR]	675.71	0.4053	2	16	16	48	528	59.2	6.99
P09867	Heterogeneous nuclear ribonucleoprotein A1 OS=Bos taurus GN=HNRNPA1 PE=1 SV=2 - [ROA1_BOVIN]	835.29	0.4094	3	10	11	47	320	34.2	9.23
G3HQM6	Endoplasmin OS=Cricetulus griseus GN=I79_013131 PE=3 SV=1 - [G3HQM6_CRIGR]	681.33	0.1308	2	8	10	47	803	92.6	4.82
G3HPV6	Histone H2A type 1 OS=Cricetulus griseus GN=I79_012827 PE=3 SV=1 - [G3HPV6_CRIGR]	857.27	0.4695	7	7	11	47	262	28.4	11.03
G3I4W4	Prothymosin alpha OS=Cricetulus griseus GN=I79_018503 PE=4 SV=1 - [G3I4W4_CRIGR]	2021.43	0.2295	3	1	1	47	61	6.6	3.9
P02081	Hemoglobin fetal subunit beta OS=Bos taurus PE=1 SV=1 - [HBBF_BOVIN]	1526.08	0.6207	3	10	10	46	145	15.8	7.03
Q3SZV3	Elongation factor 1-gamma OS=Bos taurus GN=EEF1G PE=2 SV=1 - [EF1G_BOVIN]	598.15	0.2114	4	5	7	46	440	50.3	6.57
A3KMV5	Ubiquitin-like modifier-activating enzyme 1 OS=Bos taurus GN=UBA1 PE=2 SV=1 - [UBA1_BOVIN]	1240.12	0.1664	1	1	13	46	1058	117.8	5.77
G3GXB0	Rho GDP-dissociation inhibitor 1 OS=Cricetulus griseus GN=I79_002400 PE=4 SV=1 - [G3GXB0_CRIGR]	915.78	0.652	1	4	11	46	204	23.4	5.2
G3HNY4	Phosphoglycerate kinase OS=Cricetulus griseus GN=I79_012485 PE=3 SV=1 - [G3HNY4_CRIGR]	689.21	0.702	1	4	12	46	151	16.3	8.85
G3IF80	Nucleolin OS=Cricetulus griseus GN=I79_022400 PE=4 SV=1 - [G3IF80_CRIGR]	982.6	0.1921	1	9	9	46	479	52.4	4.5
G3HJM2	Glycyl-tRNA synthetase OS=Cricetulus griseus GN=I79_010870 PE=4 SV=1 - [G3HJM2_CRIGR]	336.46	0.2508	1	11	11	46	634	71.6	5.45
G3I7D7	RNA-binding protein FUS OS=Cricetulus griseus GN=I79_019424 PE=4 SV=1 - [G3I7D7_CRIGR]	941.62	0.3512	2	5	7	46	205	21.2	10.04
P68509	14-3-3 protein eta OS=Bos taurus GN=YWHAH PE=1 SV=2 - [1433F_BOVIN]	885.86	0.374	3	7	10	45	246	28.2	4.89
G3H996	Catenin beta-1 OS=Cricetulus griseus GN=I79_006962 PE=4 SV=1 - [G3H996_CRIGR]	674.9	0.1857	2	9	12	45	781	85.4	5.86
G3HJQ8	Integrin alpha-3 OS=Cricetulus griseus GN=I79_010907 PE=3 SV=1 - [G3HJQ8_CRIGR]	863.74	0.1551	1	9	12	45	1051	116.4	6.4
G3HSE4	Proteasome subunit alpha type OS=Cricetulus griseus GN=I79_013775 PE=3 SV=1 - [G3HSE4_CRIGR]	697.55	0.3764	2	9	9	45	263	29.5	6.46
G3I5L3	Annexin OS=Cricetulus griseus GN=I79_018766 PE=3 SV=1 - [G3I5L3_CRIGR]	896.91	0.289	2	9	9	45	346	38.8	7.02
G3HE00	Follistatin (Fragment) OS=Cricetulus griseus GN=I79_008769 PE=4 SV=1 - [G3HE00_CRIGR]	718.06	0.3861	1	4	9	45	316	34.8	5.8
Q3T169	40S ribosomal protein S3 OS=Bos taurus GN=RPS3 PE=2 SV=1 - [RS3_BOVIN]	1137.64	0.4815	1	7	10	44	243	26.7	9.66
P01045-2	Isoform LMW of Kininogen-2 OS=Bos taurus GN=KNG2 - [KNG2_BOVIN]	474.88	0.2488	2	1	8	44	434	48.1	6.01
P00978	Protein AMBP OS=Bos taurus GN=AMBP PE=1 SV=2 - [AMBP_BOVIN]	782.35	0.179	1	6	6	44	352	39.2	7.62
G3HZF4	Chloride intracellular channel protein 1 OS=Cricetulus griseus GN=I79_016455 PE=4 SV=1 - [G3HZF4_CRIGR]	887.67	0.5394	1	2	12	44	241	26.9	5.17
G3GS70	Importin-5 OS=Cricetulus griseus GN=I79_000383 PE=4 SV=1 - [G3GS70_CRIGR]	1501.41	0.1685	1	10	10	44	801	89.7	4.97
G3HWJ2	Plectin-1 OS=Cricetulus griseus GN=I79_015375 PE=4 SV=1 - [G3HWJ2_CRIGR]	659.17	0.1694	1	10	10	44	720	83.4	8.54
G3H0L9	Cathepsin B OS=Cricetulus griseus GN=I79_003681 PE=3 SV=1 - [G3H0L9_CRIGR]	772.3	0.2743	2	10	10	44	339	37.5	6.13
Q3T147	Spliceosome RNA helicase DDX39B OS=Bos taurus GN=DDX39B PE=2 SV=1 - [DX39B_BOVIN]	397.59	0.2523	4	4	10	43	428	48.9	5.67
G3HD18	ATP-dependent RNA helicase DDX39 OS=Cricetulus griseus GN=I79_008391 PE=4 SV=1 - [G3HD18_CRIGR]	368.1	0.1981	3	3	9	43	424	48.7	5.78
G3IPN2	Keratin, type I cytoskeletal 10 (Fragment) OS=Cricetulus griseus GN=I79_025951 PE=3 SV=1 - [G3IPN2_CRIGR]	1141.38	0.2428	7	2	8	43	243	27.8	4.49
Q3SYV4	Adenylyl cyclase-associated protein 1 OS=Bos taurus GN=CAP1 PE=2 SV=3 - [CAP1_BOVIN]	869.14	0.2436	2	2	10	42	472	51.2	7.52
Q5E947	Peroxiredoxin-1 OS=Bos taurus GN=PRDX1 PE=2 SV=1 - [PRDX1_BOVIN]	953.51	0.3869	2	2	9	42	199	22.2	8.4
G3HYQ1	14-3-3 protein sigma OS=Cricetulus griseus GN=I79_016192 PE=3 SV=1 - [G3HYQ1_CRIGR]	878.9	0.4839	4	6	9	42	248	27.7	4.78
G3I3Y6	Glutathione S-transferase P OS=Cricetulus griseus GN=I79_018157 PE=3 SV=1 - [G3I3Y6_CRIGR]	958.73	0.2308	1	4	4	42	221	25	8.12
G3H9I9	Hepatocyte growth factor receptor OS=Cricetulus griseus GN=I79_007063 PE=4 SV=1 - [G3H9I9_CRIGR]	1598.72	0.1088	2	11	11	42	1222	136.8	6.6
Q2KJH4	WD repeat-containing protein 1 OS=Bos taurus GN=WDR1 PE=2 SV=3 - [WDR1_BOVIN]	667.21	0.2426	1	2	10	41	606	66.2	6.73
G3H638	Activator of 90 kDa heat shock protein ATPase-like 1 OS=Cricetulus griseus GN=I79_005789 PE=4 SV=1 - [G3H638_CRIGR]	383.41	0.3994	2	11	11	41	338	38.1	5.53
G3I737	40S ribosomal protein S12 OS=Cricetulus griseus GN=I79_019322 PE=3 SV=1 - [G3I737_CRIGR]	663.71	0.595	3	7	7	41	121	13.5	7.93
Q2YDE4	Proteasome subunit alpha type-6 OS=Bos taurus GN=PSMA6 PE=1 SV=1 - [PSA6_BOVIN]	949.04	0.3496	1	9	9	40	246	27.4	6.76
G3HLV6	ATP-citrate synthase OS=Cricetulus griseus GN=I79_011700 PE=4 SV=1 - [G3HLV6_CRIGR]	652.6	0.2267	3	1	14	40	697	77.1	6.46
G3I7P0	Dipeptidyl-peptidase 1 OS=Cricetulus griseus GN=I79_019536 PE=3 SV=1 - [G3I7P0_CRIGR]	676.27	0.1822	1	8	8	40	483	54.8	7.8
G3GRM2	Disintegrin and metalloproteinase domain-containing protein 10 OS=Cricetulus griseus GN=I79_000174 PE=3 SV=1 - [G3GRM2_CRIGR]	836.57	0.1659	2	8	8	40	675	75.5	7.53
G3H2E2	Heterogeneous nuclear ribonucleoprotein A/B OS=Cricetulus griseus GN=I79_004352 PE=4 SV=1 - [G3H2E2_CRIGR]	738.27	0.4834	1	8	9	40	211	23.7	9.61
Q3SZ57	Alpha-fetoprotein OS=Bos taurus GN=AFP PE=2 SV=1 - [FETA_BOVIN]	482.54	0.1525	1	6	8	39	610	68.5	6.29
O77834	Peroxiredoxin-6 OS=Bos taurus GN=PRDX6 PE=1 SV=3 - [PRDX6_BOVIN]	556.33	0.2277	1	6	6	39	224	25.1	6.38
G3I4W7	Cathepsin D OS=Cricetulus griseus GN=I79_018506 PE=3 SV=1 - [G3I4W7_CRIGR]	649.78	0.2157	1	5	6	39	408	44.1	6.98
G3I2T9	3-phosphoinositide-dependent protein kinase 1 OS=Cricetulus griseus GN=I79_017733 PE=4 SV=1 - [G3I2T9_CRIGR]	512.72	0.1339	1	8	8	39	799	89.5	6.07
G3ILI3	Seryl-tRNA synthetase, cytoplasmic OS=Cricetulus griseus GN=I79_024749 PE=3 SV=1 - [G3ILI3_CRIGR]	526.43	0.2852	2	11	11	39	512	58.6	6.19
G3I7Z8	Importin-7 OS=Cricetulus griseus GN=I79_019653 PE=4 SV=1 - [G3I7Z8_CRIGR]	525.97	0.1513	2	13	13	39	1038	119.4	4.82
Q95121	Pigment epithelium-derived factor OS=Bos taurus GN=SERPINF1 PE=1 SV=1 - [PEDF_BOVIN]	941.64	0.3558	2	10	10	38	416	46.2	7.05
P19803	Rho GDP-dissociation inhibitor 1 OS=Bos taurus GN=ARHGDIA PE=1 SV=3 - [GDIR1_BOVIN]	1024.39	0.5	1	1	8	38	204	23.4	5.2
P02253	Histone H1.2 OS=Bos taurus GN=HIST1H1C PE=1 SV=2 - [H12_BOVIN]	853.55	0.1972	6	4	6	38	213	21.3	11
G3I2H0	Dipeptidyl-peptidase 3 OS=Cricetulus griseus GN=I79_017576 PE=4 SV=1 - [G3I2H0_CRIGR]	1170.19	0.2629	1	13	13	38	738	82.9	5.22
P35950	Low-density lipoprotein receptor OS=Cricetulus griseus GN=LDLR PE=3 SV=2 - [LDLR_CRIGR]	756.37	0.1183	4	8	8	38	862	95.2	4.97
G3GUV2	Collagenase 3 OS=Cricetulus griseus GN=I79_001476 PE=4 SV=1 - [G3GUV2_CRIGR]	1073.54	0.2167	1	6	7	38	300	33.8	5.2
G3HA54	Plasminogen activator inhibitor 1 OS=Cricetulus griseus GN=I79_007296 PE=3 SV=1 - [G3HA54_CRIGR]	643.19	0.1963	2	5	5	38	270	30.7	6.23
G3HEH7	Semaphorin-7A OS=Cricetulus griseus GN=I79_008961 PE=4 SV=1 - [G3HEH7_CRIGR]	463.57	0.2089	1	10	10	38	560	63.8	7.01
G3HC39	Farnesyl pyrophosphate synthetase OS=Cricetulus griseus GN=I79_007989 PE=3 SV=1 - [G3HC39_CRIGR]	566.36	0.1147	2	4	4	38	375	43.2	7.81
G3HXL1	Poly(RC)-binding protein 1 OS=Cricetulus griseus GN=I79_015737 PE=4 SV=1 - [G3HXL1_CRIGR]	969.59	0.3287	2	6	8	37	356	37.5	7.09
P62871	Guanine nucleotide-binding protein G(I)/G(S)/G(T) subunit beta-1 OS=Bos taurus GN=GNB1 PE=1 SV=3 - [GBB1_BOVIN]	821.51	0.3941	11	4	10	37	340	37.4	6
Q8SPJ1	Junction plakoglobin OS=Bos taurus GN=JUP PE=2 SV=1 - [PLAK_BOVIN]	607.49	0.247	2	10	13	37	745	81.8	6.14
G3HQ45	Eukaryotic translation initiation factor 2 subunit 3 OS=Cricetulus griseus GN=I79_012939 PE=4 SV=1 - [G3HQ45_CRIGR]	1091.59	0.2648	2	9	9	37	472	51.1	8.4
G3HDS3	Histone H2A OS=Cricetulus griseus GN=I79_008689 PE=3 SV=1 - [G3HDS3_CRIGR]	553.91	0.4407	13	1	8	37	236	26.7	10.92
G3HFY9	Ubiquitin-conjugating enzyme E2 L3 OS=Cricetulus griseus GN=I79_009507 PE=3 SV=1 - [G3HFY9_CRIGR]	574.13	0.487	2	6	6	37	154	17.8	8.22
P62992	Ubiquitin-40S ribosomal protein S27a OS=Bos taurus GN=RPS27A PE=1 SV=2 - [RS27A_BOVIN]	477.46	0.5	6	7	7	36	156	18	9.64
Q5E9B7	Chloride intracellular channel protein 1 OS=Bos taurus GN=CLIC1 PE=2 SV=3 - [CLIC1_BOVIN]	720.97	0.5394	1	1	11	36	241	27	5.27
P26882	Peptidyl-prolyl cis-trans isomerase D OS=Bos taurus GN=PPID PE=1 SV=6 - [PPID_BOVIN]	586.62	0.2108	2	9	9	36	370	40.6	6.55
G3HPZ5	Macrophage-capping protein OS=Cricetulus griseus GN=I79_012882 PE=4 SV=1 - [G3HPZ5_CRIGR]	952.05	0.3967	2	7	7	36	305	33.3	5.82
G3IE21	Aldose reductase-related protein 2 OS=Cricetulus griseus GN=I79_021963 PE=4 SV=1 - [G3IE21_CRIGR]	740.52	0.3323	1	6	8	36	316	36.3	6.68
P50291	Follistatin OS=Bos taurus GN=FST PE=2 SV=2 - [FST_BOVIN]	574.23	0.1977	1	1	6	36	344	37.9	6.07
G3HN77	Polyadenylate-binding protein 4 OS=Cricetulus griseus GN=I79_012213 PE=4 SV=1 - [G3HN77_CRIGR]	888.12	0.1947	3	2	9	36	524	57.9	9.23
P28800	Alpha-2-antiplasmin OS=Bos taurus GN=SERPINF2 PE=1 SV=2 - [A2AP_BOVIN]	953.62	0.1768	1	7	7	35	492	54.7	5.72
A7E3Q8	Plastin-3 OS=Bos taurus GN=PLS3 PE=2 SV=1 - [PLST_BOVIN]	294.16	0.1889	3	3	11	35	630	70.8	5.6
G3GWE9	Solute carrier family 2, facilitated glucose transporter member 9 OS=Cricetulus griseus GN=I79_002071 PE=3 SV=1 - [G3GWE9_CRIGR]	564.41	0.1258	1	1	9	35	994	108.9	8.05
G3IKS9	Glutaredoxin-3 OS=Cricetulus griseus GN=I79_024482 PE=4 SV=1 - [G3IKS9_CRIGR]	635.43	0.262	2	8	8	35	332	37.6	5.39
P62998	Ras-related C3 botulinum toxin substrate 1 OS=Bos taurus GN=RAC1 PE=1 SV=1 - [RAC1_BOVIN]	458.52	0.3906	6	7	8	34	192	21.4	8.5
Q148H7	Keratin, type II cytoskeletal 79 OS=Bos taurus GN=KRT79 PE=2 SV=1 - [K2C79_BOVIN]	696.12	0.0972	10	1	7	34	535	57.7	7.46
G3IBF1	Nucleophosmin OS=Cricetulus griseus GN=I79_020971 PE=4 SV=1 - [G3IBF1_CRIGR]	797.8	0.4357	1	3	7	34	280	31	4.67
G3IBY4	Plastin-3 OS=Cricetulus griseus GN=I79_021170 PE=4 SV=1 - [G3IBY4_CRIGR]	305.89	0.2543	3	2	10	34	460	51.9	6.14
G3HRJ7	Catenin delta-1 OS=Cricetulus griseus GN=I79_013441 PE=4 SV=1 - [G3HRJ7_CRIGR]	320.77	0.1406	1	11	11	34	932	104	6.95
G3HYP6	Nuclear migration protein nudC OS=Cricetulus griseus GN=I79_016187 PE=4 SV=1 - [G3HYP6_CRIGR]	239.19	0.2695	2	2	8	34	282	32.8	5.99
G3GTX3	Suppressor of tumorigenicity 14 protein homolog OS=Cricetulus griseus GN=I79_001113 PE=3 SV=1 - [G3GTX3_CRIGR]	1073	0.1052	2	7	7	34	827	92	6.55
G3I073	Elongation factor 1-gamma OS=Cricetulus griseus GN=I79_016750 PE=4 SV=1 - [G3I073_CRIGR]	185.29	0.1923	1	1	3	34	234	27.1	6.05
P11017	Guanine nucleotide-binding protein G(I)/G(S)/G(T) subunit beta-2 OS=Bos taurus GN=GNB2 PE=2 SV=3 - [GBB2_BOVIN]	483.64	0.3412	12	3	9	33	340	37.3	6
Q3T0R1	40S ribosomal protein S18 OS=Bos taurus GN=RPS18 PE=2 SV=3 - [RS18_BOVIN]	701.45	0.3289	5	6	6	33	152	17.7	10.99
P62326	Thymosin beta-4 OS=Bos taurus GN=TMSB4 PE=1 SV=2 - [TYB4_BOVIN]	495.3	0.8636	1	4	4	33	44	5	5.06
G3HIC5	RuvB-like 1 OS=Cricetulus griseus GN=I79_010385 PE=4 SV=1 - [G3HIC5_CRIGR]	543.27	0.3114	1	10	10	33	456	50.2	6.42
P01030	Complement C4 (Fragments) OS=Bos taurus GN=C4 PE=1 SV=2 - [CO4_BOVIN]	515.07	0.1337	1	10	10	33	920	101.8	6.58
P26452	40S ribosomal protein SA OS=Bos taurus GN=RPSA PE=2 SV=4 - [RSSA_BOVIN]	810.59	0.3797	6	10	10	33	295	32.9	4.87
G3GRE1	Bifunctional aminoacyl-tRNA synthetase (Fragment) OS=Cricetulus griseus GN=I79_000086 PE=3 SV=1 - [G3GRE1_CRIGR]	525.59	0.1176	1	12	12	33	1378	154.8	7.06
G3INC5	Cathepsin L1 OS=Cricetulus griseus GN=I79_025440 PE=3 SV=1 - [G3INC5_CRIGR]	690.35	0.2042	1	5	5	33	333	37.2	7.17
G3IG23	Alanyl-tRNA synthetase, cytoplasmic OS=Cricetulus griseus GN=I79_022700 PE=3 SV=1 - [G3IG23_CRIGR]	785.91	0.1415	1	9	9	33	968	106.8	5.62
G3GT06	T-complex protein 1 subunit theta OS=Cricetulus griseus GN=I79_000779 PE=4 SV=1 - [G3GT06_CRIGR]	624.44	0.4043	1	4	9	33	230	24.8	5.29
G3GUI3	FK506-binding protein 4 OS=Cricetulus griseus GN=I79_001345 PE=4 SV=1 - [G3GUI3_CRIGR]	515.87	0.253	1	3	8	33	411	46.6	5.81
G3GSK4	Serine/threonine-protein kinase PAK 2 OS=Cricetulus griseus GN=I79_000619 PE=4 SV=1 - [G3GSK4_CRIGR]	556.94	0.2767	4	9	9	33	524	57.9	5.77
Q5E987	Proteasome subunit alpha type-5 OS=Bos taurus GN=PSMA5 PE=1 SV=1 - [PSA5_BOVIN]	794.28	0.4191	2	7	7	32	241	26.4	4.79
A0JN52	Splicing factor 3B subunit 3 OS=Bos taurus GN=SF3B3 PE=2 SV=1 - [SF3B3_BOVIN]	760.51	0.0772	2	8	8	32	1217	135.5	5.26
G3HRQ4	Myosin light polypeptide 6 OS=Cricetulus griseus GN=I79_013501 PE=4 SV=1 - [G3HRQ4_CRIGR]	719.21	0.6093	8	7	7	32	151	16.9	4.65
G3HX84	Gelsolin OS=Cricetulus griseus GN=I79_015603 PE=4 SV=1 - [G3HX84_CRIGR]	673.43	0.1778	1	3	7	32	658	72	6.32
G3HBP8	40S ribosomal protein S2 OS=Cricetulus griseus GN=I79_007954 PE=3 SV=1 - [G3HBP8_CRIGR]	239.8	0.273	19	7	7	32	293	31.2	10.24
G3HMG4	Amyloid beta A4 protein OS=Cricetulus griseus GN=I79_011926 PE=4 SV=1 - [G3HMG4_CRIGR]	545.88	0.1594	1	6	6	32	433	49.1	6.05
G3I3G8	Transaldolase OS=Cricetulus griseus GN=I79_017974 PE=3 SV=1 - [G3I3G8_CRIGR]	534.87	0.3383	3	13	13	32	337	37.5	7.03
G3HD42	Serpin B5 OS=Cricetulus griseus GN=I79_008416 PE=3 SV=1 - [G3HD42_CRIGR]	802.53	0.2507	1	7	7	32	375	42.1	6.1
G3HR08	Cytosol aminopeptidase OS=Cricetulus griseus GN=I79_013268 PE=3 SV=1 - [G3HR08_CRIGR]	1055.67	0.2554	3	9	9	32	462	50.2	6.87
G3HDR3	T-complex protein 1 subunit delta OS=Cricetulus griseus GN=I79_008649 PE=4 SV=1 - [G3HDR3_CRIGR]	772.58	0.194	1	1	6	32	397	42.1	8.27
G3IFK8	MAM domain-containing protein 2 OS=Cricetulus griseus GN=I79_022531 PE=4 SV=1 - [G3IFK8_CRIGR]	430.79	0.2196	1	9	9	32	469	53.3	5.68
A7MB16	Eukaryotic translation initiation factor 3 subunit B OS=Bos taurus GN=EIF3B PE=2 SV=1 - [EIF3B_BOVIN]	368.74	0.1807	1	10	10	31	786	88.9	4.97
A2VE99	Septin-11 OS=Bos taurus GN=SEPT11 PE=2 SV=1 - [SEP11_BOVIN]	492.46	0.1859	5	2	6	31	425	49	6.81
G3H0C2	Proteasome subunit alpha type OS=Cricetulus griseus GN=I79_003577 PE=3 SV=1 - [G3H0C2_CRIGR]	675.72	0.6054	2	10	10	31	261	29.5	7.72
G3H3E6	Metalloproteinase inhibitor 2 OS=Cricetulus griseus GN=I79_004761 PE=4 SV=1 - [G3H3E6_CRIGR]	410	0.3717	2	5	5	31	191	21.5	7.52
G3GUV3	Macrophage metalloelastase OS=Cricetulus griseus GN=I79_001477 PE=4 SV=1 - [G3GUV3_CRIGR]	447.37	0.1185	1	4	4	31	464	53.3	9.35
G3H8Z9	Sodium/potassium-transporting ATPase subunit alpha-1 OS=Cricetulus griseus GN=I79_006860 PE=3 SV=1 - [G3H8Z9_CRIGR]	725.52	0.1061	7	5	5	31	773	84.7	5.06
G3GYR9	40S ribosomal protein S8 OS=Cricetulus griseus GN=I79_002981 PE=3 SV=1 - [G3GYR9_CRIGR]	617.55	0.399	2	7	7	30	208	24.2	10.32
P79103	40S ribosomal protein S4 OS=Bos taurus GN=RPS4 PE=2 SV=3 - [RS4_BOVIN]	618.59	0.2586	5	8	8	30	263	29.6	10.15
Q2HJ60	Heterogeneous nuclear ribonucleoproteins A2/B1 OS=Bos taurus GN=HNRNPA2B1 PE=2 SV=1 - [ROA2_BOVIN]	548.71	0.393	2	9	10	30	341	36	8.65
Q0VCX5	Eukaryotic peptide chain release factor subunit 1 OS=Bos taurus GN=ETF1 PE=2 SV=3 - [ERF1_BOVIN]	425.96	0.2105	2	7	7	30	437	49	5.71
G3HVB8	Platelet-activating factor acetylhydrolase IB subunit alpha OS=Cricetulus griseus GN=Pafah1b1 PE=3 SV=1 - [G3HVB8_CRIGR]	386.58	0.1951	2	5	6	30	410	46.6	7.37
Q3SX14	Gelsolin OS=Bos taurus GN=GSN PE=2 SV=1 - [GELS_BOVIN]	653.58	0.1204	1	3	7	30	731	80.7	5.78
Q6B855	Transketolase OS=Bos taurus GN=TKT PE=2 SV=1 - [TKT_BOVIN]	528.74	0.1525	2	1	7	30	623	67.9	7.65
G3HBI9	Leukotriene A-4 hydrolase OS=Cricetulus griseus GN=I79_007819 PE=4 SV=1 - [G3HBI9_CRIGR]	609.84	0.3837	1	7	14	30	529	59.7	6.28
G3H8Y8	Collagen alpha-1(XVIII) chain OS=Cricetulus griseus GN=I79_006837 PE=4 SV=1 - [G3H8Y8_CRIGR]	752.74	0.0906	1	8	8	30	883	95.5	6.33
G3I390	Actin-related protein 2/3 complex subunit 1B OS=Cricetulus griseus GN=I79_017891 PE=4 SV=1 - [G3I390_CRIGR]	545.15	0.2366	5	6	6	30	372	41	8.35
G3HDS7	Histone H1.3 OS=Cricetulus griseus GN=I79_008693 PE=3 SV=1 - [G3HDS7_CRIGR]	649.38	0.1449	2	2	4	30	207	20.5	11.02
G3HNK4	Dihydropyrimidinase-related protein 2 OS=Cricetulus griseus GN=I79_012342 PE=4 SV=1 - [G3HNK4_CRIGR]	997.58	0.3217	3	13	13	30	572	62.2	6.38
G3H697	Glucosidase 2 subunit beta OS=Cricetulus griseus GN=I79_005851 PE=4 SV=1 - [G3H697_CRIGR]	590.67	0.1277	2	5	5	30	556	62.3	4.48
P18203	Peptidyl-prolyl cis-trans isomerase FKBP1A OS=Bos taurus GN=FKBP1A PE=1 SV=2 - [FKB1A_BOVIN]	777.55	0.2963	1	4	5	29	108	11.9	8.15
P38657	Protein disulfide-isomerase A3 OS=Bos taurus GN=PDIA3 PE=2 SV=1 - [PDIA3_BOVIN]	448.03	0.1188	1	3	7	29	505	56.9	6.65
Q2KIW9	UMP-CMP kinase OS=Bos taurus GN=CMPK1 PE=2 SV=2 - [KCY_BOVIN]	257.76	0.0918	1	2	2	29	196	22.3	5.83
G3HW36	Serine hydroxymethyltransferase OS=Cricetulus griseus GN=I79_015184 PE=1 SV=1 - [G3HW36_CRIGR]	740.82	0.2143	2	8	9	29	504	55.9	8.4
G3H4Z5	C-1-tetrahydrofolate synthase, cytoplasmic OS=Cricetulus griseus GN=I79_005359 PE=3 SV=1 - [G3H4Z5_CRIGR]	567.01	0.1538	1	11	12	29	936	101.2	7.78
G3IHT7	Semaphorin-4B OS=Cricetulus griseus GN=I79_023393 PE=4 SV=1 - [G3IHT7_CRIGR]	458.13	0.0985	5	8	8	29	792	87.8	7.23
G3HCL6	Complement C3 OS=Cricetulus griseus GN=I79_008227 PE=4 SV=1 - [G3HCL6_CRIGR]	220.77	0.0603	1	3	10	29	1626	182.1	6.73
G3HKN1	Protein SET OS=Cricetulus griseus GN=I79_011260 PE=3 SV=1 - [G3HKN1_CRIGR]	462.12	0.15	9	6	6	29	380	44.2	4.08
G3I8F5	Keratin, type I cytoskeletal 13 OS=Cricetulus griseus GN=I79_019822 PE=3 SV=1 - [G3I8F5_CRIGR]	559.51	0.1471	10	2	8	29	442	48.1	4.94
G3GTK5	Proprotein convertase subtilisin/kexin type 9 OS=Cricetulus griseus GN=I79_000990 PE=4 SV=1 - [G3GTK5_CRIGR]	457.88	0.1042	1	7	7	29	691	74.1	6.96
G3I4Z7	Galectin OS=Cricetulus griseus GN=I79_018538 PE=4 SV=1 - [G3I4Z7_CRIGR]	723.14	0.4815	1	5	5	29	135	14.8	5.8
G3HP50	CUB domain-containing protein 1 OS=Cricetulus griseus GN=I79_012554 PE=4 SV=1 - [G3HP50_CRIGR]	178.23	0.0504	1	4	4	29	833	92.6	7.84
G3H832	Translationally-controlled tumor protein OS=Cricetulus griseus GN=I79_006528 PE=4 SV=1 - [G3H832_CRIGR]	193.03	0.6268	2	5	5	29	142	15.9	4.96
Q1LZH9	N-acetylglucosamine-6-sulfatase OS=Bos taurus GN=GNS PE=2 SV=1 - [GNS_BOVIN]	680.35	0.1089	1	1	6	28	560	62.7	8.43
G3GZA9	Reticulocalbin-1 (Fragment) OS=Cricetulus griseus GN=I79_003169 PE=4 SV=1 - [G3GZA9_CRIGR]	311.17	0.313	1	6	6	28	246	29.3	4.7
G3IEX3	Peptidyl-prolyl cis-trans isomerase H OS=Cricetulus griseus GN=I79_022278 PE=3 SV=1 - [G3IEX3_CRIGR]	441.97	0.194	3	2	3	28	134	14.6	8.37
G3GR86	6-phosphofructokinase OS=Cricetulus griseus GN=I79_000029 PE=3 SV=1 - [G3GR86_CRIGR]	602.78	0.1072	1	5	7	28	793	86.2	7.09
G3HZY1	RuvB-like 2 OS=Cricetulus griseus GN=I79_016646 PE=4 SV=1 - [G3HZY1_CRIGR]	494.45	0.166	2	5	7	28	518	57.2	6.42
Q3T160	Nucleophosmin OS=Bos taurus GN=NPM1 PE=2 SV=1 - [NPM_BOVIN]	711.15	0.2687	1	1	5	27	294	32.7	4.77
O62768	Thioredoxin reductase 1, cytoplasmic OS=Bos taurus GN=TXNRD1 PE=2 SV=3 - [TRXR1_BOVIN]	769.87	0.2024	2	4	7	27	499	54.7	6.47
A1A4J1	ATP-dependent 6-phosphofructokinase, liver type OS=Bos taurus GN=PFKL PE=2 SV=1 - [PFKAL_BOVIN]	590.92	0.1192	3	1	7	27	780	85.2	7.36
G3I8B3	TATA-binding protein-associated factor 2N OS=Cricetulus griseus GN=I79_019776 PE=4 SV=1 - [G3I8B3_CRIGR]	643.28	0.0797	1	1	3	27	389	39.5	9.42
G3HH37	CD109 antigen OS=Cricetulus griseus GN=I79_009933 PE=4 SV=1 - [G3HH37_CRIGR]	462.82	0.0471	1	6	6	27	1443	161.8	6.2
G3HGP4	Acetyl-CoA acetyltransferase, cytosolic OS=Cricetulus griseus GN=I79_009782 PE=3 SV=1 - [G3HGP4_CRIGR]	304.71	0.1965	1	6	6	27	397	41	7.27
G3IC99	Septin-11 OS=Cricetulus griseus GN=I79_021290 PE=3 SV=1 - [G3IC99_CRIGR]	453.06	0.1304	5	1	5	27	437	50.3	7.36
G3I873	Ubiquitin thioesterase OTUB1 OS=Cricetulus griseus GN=I79_019736 PE=4 SV=1 - [G3I873_CRIGR]	824.98	0.3195	2	6	6	27	241	28	5.29
G3I412	45 kDa calcium-binding protein OS=Cricetulus griseus GN=I79_018191 PE=4 SV=1 - [G3I412_CRIGR]	438.3	0.307	2	6	6	27	355	41.2	4.89
G3GTB7	Heterogeneous nuclear ribonucleoprotein Q OS=Cricetulus griseus GN=I79_000895 PE=4 SV=1 - [G3GTB7_CRIGR]	372.69	0.1459	1	3	7	26	562	62.6	7.56
G3I8P7	N-acetylglucosamine-6-sulfatase OS=Cricetulus griseus GN=I79_019923 PE=3 SV=1 - [G3I8P7_CRIGR]	591.87	0.23	1	2	7	26	474	53.7	6.87
G3H8W5	6-phosphofructokinase OS=Cricetulus griseus GN=I79_006852 PE=3 SV=1 - [G3H8W5_CRIGR]	750.66	0.1436	1	2	8	26	745	81.5	7.42
G3HWP9	Heterogeneous nuclear ribonucleoproteins C1/C2 OS=Cricetulus griseus GN=I79_015427 PE=4 SV=1 - [G3HWP9_CRIGR]	858.01	0.1564	2	4	4	26	307	33.7	5.08
G3HNT9	Proteasome subunit beta type-1 OS=Cricetulus griseus GN=I79_012433 PE=4 SV=1 - [G3HNT9_CRIGR]	677.25	0.6	1	1	6	26	140	15.6	8.1
G3H902	Prostaglandin F2 receptor negative regulator OS=Cricetulus griseus GN=I79_006863 PE=4 SV=1 - [G3H902_CRIGR]	520.5	0.1337	1	8	8	26	830	93.7	6.58
G3I692	Cytosolic non-specific dipeptidase OS=Cricetulus griseus GN=I79_019004 PE=4 SV=1 - [G3I692_CRIGR]	533.91	0.2168	2	6	6	26	475	52.8	5.94
G3GU76	60S acidic ribosomal protein P0 OS=Cricetulus griseus GN=I79_001228 PE=3 SV=1 - [G3GU76_CRIGR]	511.13	0.2206	5	4	4	26	272	29.9	8.51
G3GRT0	Adenine phosphoribosyltransferase OS=Cricetulus griseus GN=I79_000224 PE=3 SV=1 - [G3GRT0_CRIGR]	613.34	0.4115	1	6	6	26	192	20.8	5.92
A2I7N3	Serpin A3-7 OS=Bos taurus GN=SERPINA3-7 PE=3 SV=1 - [SPA37_BOVIN]	239.89	0.2086	1	7	8	25	417	46.9	6.34
Q2TBX6	Proteasome subunit beta type-1 OS=Bos taurus GN=PSMB1 PE=1 SV=1 - [PSB1_BOVIN]	691.1	0.3527	1	1	6	25	241	26.2	8.13
A3KN12	Adenylosuccinate lyase OS=Bos taurus GN=ADSL PE=2 SV=1 - [PUR8_BOVIN]	328.06	0.0857	2	4	4	25	490	55.4	6.89
G3IKH3	Collagen alpha-2(V) chain OS=Cricetulus griseus GN=I79_024376 PE=4 SV=1 - [G3IKH3_CRIGR]	478.53	0.1294	1	3	3	25	170	19	7.72
G3HJS0	Spectrin beta chain, brain 1 OS=Cricetulus griseus GN=I79_010919 PE=4 SV=1 - [G3HJS0_CRIGR]	662.79	0.1059	1	12	12	25	1426	166.2	5.59
G3GZZ0	Aspartate aminotransferase OS=Cricetulus griseus GN=I79_003438 PE=3 SV=1 - [G3GZZ0_CRIGR]	406.03	0.2179	12	5	8	25	413	46.2	7.21
G3HD94	Desmoplakin OS=Cricetulus griseus GN=I79_008473 PE=4 SV=1 - [G3HD94_CRIGR]	264.02	0.0222	1	7	7	25	2836	328.2	6.92
G3HP75	D-3-phosphoglycerate dehydrogenase OS=Cricetulus griseus GN=I79_012581 PE=3 SV=1 - [G3HP75_CRIGR]	585.77	0.1332	3	6	6	25	533	56.5	6.9
G3I1H5	Legumain OS=Cricetulus griseus GN=I79_017232 PE=4 SV=1 - [G3I1H5_CRIGR]	400.41	0.2489	1	8	8	25	438	49.6	6.55
G3IN86	Dipeptidyl-peptidase 2 OS=Cricetulus griseus GN=I79_025398 PE=4 SV=1 - [G3IN86_CRIGR]	363.94	0.0988	1	5	5	25	506	56.4	6.54
G3HY08	Macrophage migration inhibitory factor OS=Cricetulus griseus GN=I79_015933 PE=4 SV=1 - [G3HY08_CRIGR]	637.34	0.2348	1	3	3	25	115	12.4	7.34
Q3ZBA6	DnaJ homolog subfamily B member 11 OS=Bos taurus GN=DNAJB11 PE=2 SV=1 - [DJB11_BOVIN]	947.29	0.1872	2	5	5	25	358	40.5	6.32
G3GZ90	Calumenin OS=Cricetulus griseus GN=I79_003123 PE=4 SV=1 - [G3GZ90_CRIGR]	194.21	0.1232	1	1	6	25	763	87.9	5.39
P56701	26S proteasome non-ATPase regulatory subunit 2 OS=Bos taurus GN=PSMD2 PE=1 SV=2 - [PSMD2_BOVIN]	179.85	0.1002	2	5	8	24	908	100.2	5.2
Q6Q137	Septin-7 OS=Bos taurus GN=SEPT7 PE=2 SV=2 - [SEPT7_BOVIN]	461.28	0.1785	1	2	6	24	437	50.6	8.63
Q5E9J1	Heterogeneous nuclear ribonucleoprotein F OS=Bos taurus GN=HNRNPF PE=2 SV=3 - [HNRPF_BOVIN]	409.91	0.2053	2	4	6	24	414	45.7	5.49
Q3T0K1	Calumenin OS=Bos taurus GN=CALU PE=2 SV=1 - [CALU_BOVIN]	302.74	0.3175	1	1	6	24	315	37.1	4.59
Q17QG2	Nuclear migration protein nudC OS=Bos taurus GN=NUDC PE=2 SV=1 - [NUDC_BOVIN]	101.03	0.2108	3	1	7	24	332	38.2	5.31
Q9TRY0	Peptidyl-prolyl cis-trans isomerase FKBP4 OS=Bos taurus GN=FKBP4 PE=1 SV=4 - [FKBP4_BOVIN]	416.06	0.1612	1	1	6	24	459	51.5	5.39
G3I5V6	Mitotic checkpoint protein BUB3 OS=Cricetulus griseus GN=I79_018864 PE=4 SV=1 - [G3I5V6_CRIGR]	383.66	0.179	3	5	5	24	324	36.7	6.84
G3GY52	Phosphoribosylformylglycinamidine synthase OS=Cricetulus griseus GN=I79_002708 PE=4 SV=1 - [G3GY52_CRIGR]	456.98	0.0516	1	5	5	24	1338	144.6	5.63
G3H6M5	Fumarate hydratase, mitochondrial OS=Cricetulus griseus GN=I79_005991 PE=3 SV=1 - [G3H6M5_CRIGR]	911.88	0.1677	1	5	5	24	507	54.4	9.09
G3HTJ2	Septin-7 (Fragment) OS=Cricetulus griseus GN=I79_014218 PE=3 SV=1 - [G3HTJ2_CRIGR]	430.55	0.1949	1	1	5	24	354	41.2	8.6
G3I8H3	Vacuolar protein sorting-associated protein 35 OS=Cricetulus griseus GN=I79_019847 PE=4 SV=1 - [G3I8H3_CRIGR]	409.41	0.0498	2	6	6	24	1427	159.5	5.24
P40673	High mobility group protein B2 OS=Bos taurus GN=HMGB2 PE=1 SV=3 - [HMGB2_BOVIN]	136.4	0.3014	5	7	9	23	209	24	7.81
Q2KJI3	Protein FAM49B OS=Bos taurus GN=FAM49B PE=2 SV=1 - [FA49B_BOVIN]	582.62	0.2438	3	5	5	23	324	36.7	6.06
P01966	Hemoglobin subunit alpha OS=Bos taurus GN=HBA PE=1 SV=2 - [HBA_BOVIN]	278.46	0.3239	1	3	3	23	142	15.2	8.44
Q3ZBG0	Proteasome subunit alpha type-7 OS=Bos taurus GN=PSMA7 PE=1 SV=1 - [PSA7_BOVIN]	395.88	0.496	1	1	8	23	248	27.9	8.46
G3HAP7	Glutathione synthetase OS=Cricetulus griseus GN=I79_007504 PE=4 SV=1 - [G3HAP7_CRIGR]	459.81	0.1561	15	6	6	23	474	52.2	5.57
G3IAG0	Xaa-Pro aminopeptidase 1 OS=Cricetulus griseus GN=I79_020582 PE=3 SV=1 - [G3IAG0_CRIGR]	507.18	0.0931	4	5	5	23	623	69.8	5.54
G3HU51	Isocitrate dehydrogenase [NADP] OS=Cricetulus griseus GN=I79_014456 PE=3 SV=1 - [G3HU51_CRIGR]	196.04	0.1063	4	1	5	23	414	46.7	6.99
G3GU30	60S ribosomal protein L6 OS=Cricetulus griseus GN=I79_001178 PE=3 SV=1 - [G3GU30_CRIGR]	312.63	0.2302	5	5	5	23	291	32.8	10.51
G3HI96	Coronin OS=Cricetulus griseus GN=I79_010363 PE=3 SV=1 - [G3HI96_CRIGR]	435.97	0.1709	1	6	6	23	474	53.1	7.09
G3GWR8	Proteasome subunit alpha type-7 (Fragment) OS=Cricetulus griseus GN=I79_002199 PE=4 SV=1 - [G3GWR8_CRIGR]	611.01	0.5425	1	1	8	23	212	23.8	8.48
P86435	Neurosecretory protein VGF OS=Bos taurus GN=VGF PE=1 SV=2 - [VGF_BOVIN]	355.7	0.1019	1	6	6	23	618	67.6	4.88
G3IA32	COP9 signalosome complex subunit 4 OS=Cricetulus griseus GN=I79_020448 PE=4 SV=1 - [G3IA32_CRIGR]	572.76	0.2217	2	6	6	23	406	46.3	5.83
G3H3H9	Aminopeptidase B OS=Cricetulus griseus GN=I79_004826 PE=4 SV=1 - [G3H3H9_CRIGR]	326.4	0.1354	1	6	6	23	650	72.9	5.83
G3HQL6	Thioredoxin reductase 1, cytoplasmic OS=Cricetulus griseus GN=I79_013121 PE=3 SV=1 - [G3HQL6_CRIGR]	456.87	0.1097	1	1	4	23	565	61.8	7.91
P67808	Nuclease-sensitive element-binding protein 1 OS=Bos taurus GN=YBX1 PE=2 SV=3 - [YBOX1_BOVIN]	944.85	0.2654	2	4	4	22	324	35.9	9.88
G3I6J4	ADP-ribosylation factor 3 OS=Cricetulus griseus GN=I79_019118 PE=3 SV=1 - [G3I6J4_CRIGR]	542.83	0.3039	6	4	4	22	181	20.6	7.43
Q3SZ52	Ubiquitin-conjugating enzyme E2 variant 1 OS=Bos taurus GN=UBE2V1 PE=2 SV=1 - [UB2V1_BOVIN]	323.95	0.2789	4	3	4	22	147	16.5	7.93
G3HKG8	40S ribosomal protein S3a OS=Cricetulus griseus GN=Rps3a PE=3 SV=1 - [G3HKG8_CRIGR]	184.71	0.3106	4	8	8	22	264	29.9	9.73
G3IEK1	Actin-related protein 2/3 complex subunit 2 OS=Cricetulus griseus GN=I79_022148 PE=4 SV=1 - [G3IEK1_CRIGR]	257.28	0.22	2	7	7	22	300	34.3	7.36
Q58DT1	60S ribosomal protein L7 OS=Bos taurus GN=RPL7 PE=2 SV=1 - [RL7_BOVIN]	148.3	0.2621	4	3	6	22	248	29.2	10.68
Q5E946	Protein DJ-1 OS=Bos taurus GN=PARK7 PE=2 SV=1 - [PARK7_BOVIN]	408.87	0.3069	1	3	5	22	189	20	7.33
A7MB70	Semaphorin-3C OS=Bos taurus GN=SEMA3C PE=2 SV=1 - [SEM3C_BOVIN]	338.7	0.0652	2	5	5	22	751	85.2	8.62
G3GZL3	Roquin OS=Cricetulus griseus GN=I79_003298 PE=3 SV=1 - [G3GZL3_CRIGR]	257.05	0.0331	1	1	4	22	1418	158.5	7.47
G3GZL7	Calcyclin-binding protein OS=Cricetulus griseus GN=I79_003304 PE=4 SV=1 - [G3GZL7_CRIGR]	315.56	0.038	2	1	1	22	184	21.2	7.27
G3H9H7	Heterogeneous nuclear ribonucleoprotein G OS=Cricetulus griseus GN=I79_007049 PE=4 SV=1 - [G3H9H7_CRIGR]	204.73	0.1082	1	1	4	22	388	42.1	9.99
G3I0M2	Platelet-activating factor acetylhydrolase IB subunit gamma OS=Cricetulus griseus GN=I79_016910 PE=4 SV=1 - [G3I0M2_CRIGR]	584.85	0.1096	2	3	3	22	228	25.5	8.63
G3I2Y1	Aspartate aminotransferase OS=Cricetulus griseus GN=I79_017779 PE=3 SV=1 - [G3I2Y1_CRIGR]	522.37	0.1977	2	6	6	22	430	47.4	9
G3HT77	Cytoplasmic FMR1-interacting protein 1 OS=Cricetulus griseus GN=I79_014098 PE=4 SV=1 - [G3HT77_CRIGR]	303.8	0.0854	2	10	10	22	1253	145.2	6.9
G3H2T4	Histone H2B OS=Cricetulus griseus GN=I79_004536 PE=3 SV=1 - [G3H2T4_CRIGR]	497.96	0.3254	13	5	5	21	126	13.9	10.32
Q3T102	Eukaryotic translation initiation factor 3 subunit E OS=Bos taurus GN=EIF3E PE=2 SV=1 - [EIF3E_BOVIN]	229.76	0.2112	3	8	8	21	445	52.2	6.04
Q2HJ33	Obg-like ATPase 1 OS=Bos taurus GN=OLA1 PE=2 SV=1 - [OLA1_BOVIN]	356.59	0.25	2	8	8	21	396	44.7	7.81
Q2KJ25	26S proteasome non-ATPase regulatory subunit 12 OS=Bos taurus GN=PSMD12 PE=2 SV=3 - [PSD12_BOVIN]	254.26	0.0833	3	4	4	21	456	53	7.36
G3HRD9	Proteasome subunit beta type OS=Cricetulus griseus GN=I79_013406 PE=3 SV=1 - [G3HRD9_CRIGR]	680.07	0.3194	2	8	8	21	263	28.7	7.02
G3H9V0	Proteasome subunit beta type OS=Cricetulus griseus GN=I79_007181 PE=3 SV=1 - [G3H9V0_CRIGR]	236.96	0.3731	5	6	7	21	201	22.8	7.88
G3HKU8	Cadherin-1 OS=Cricetulus griseus GN=I79_011330 PE=3 SV=1 - [G3HKU8_CRIGR]	727.92	0.0753	2	4	5	21	744	82.3	4.51
G3HTG9	Glyoxalase domain-containing protein 4 OS=Cricetulus griseus GN=I79_014194 PE=4 SV=1 - [G3HTG9_CRIGR]	219.38	0.1946	1	5	5	21	298	33.2	5.47
G3I4I9	Major vault protein OS=Cricetulus griseus GN=I79_018369 PE=4 SV=1 - [G3I4I9_CRIGR]	448.94	0.0906	2	7	7	21	861	95.9	5.73
G3H1W4	Tubulointerstitial nephritis antigen-like OS=Cricetulus griseus GN=I79_004150 PE=3 SV=1 - [G3H1W4_CRIGR]	372.55	0.1785	1	6	6	21	465	52.5	7.08
G3IB32	Twinfilin-1 OS=Cricetulus griseus GN=I79_020820 PE=4 SV=1 - [G3IB32_CRIGR]	656.8	0.1041	1	2	4	21	413	46.2	8
G3GX55	Brain-specific angiogenesis inhibitor 1-associated protein 2 OS=Cricetulus griseus GN=I79_002368 PE=4 SV=1 - [G3GX55_CRIGR]	195.98	0.1315	2	6	6	21	555	61.2	8.84
G3H576	Annexin OS=Cricetulus griseus GN=I79_005451 PE=3 SV=1 - [G3H576_CRIGR]	473.23	0.1272	1	4	7	21	676	76.4	5.59
G3IDU1	Zinc transporter ZIP10 OS=Cricetulus griseus GN=I79_021878 PE=4 SV=1 - [G3IDU1_CRIGR]	359.73	0.0278	1	2	2	21	791	89.2	6.7
G3H1U2	Heterogeneous nuclear ribonucleoprotein A3 OS=Cricetulus griseus GN=I79_004125 PE=4 SV=1 - [G3H1U2_CRIGR]	329.94	0.2529	3	4	6	21	261	26.9	8.84
G3GXA9	Protein disulfide-isomerase OS=Cricetulus griseus GN=I79_002399 PE=3 SV=1 - [G3GXA9_CRIGR]	297.07	0.2989	1	1	5	21	184	21.1	4.64
G3HDQ2	Malate dehydrogenase OS=Cricetulus griseus GN=I79_008638 PE=3 SV=1 - [G3HDQ2_CRIGR]	733.63	0.1856	1	2	4	21	334	36.4	6.58
G3I1D2	Actin-like protein 6A OS=Cricetulus griseus GN=I79_017185 PE=3 SV=1 - [G3I1D2_CRIGR]	713.4	0.1049	1	3	3	21	429	47.4	5.6
G3HUM5	SUMO-activating enzyme subunit 2 OS=Cricetulus griseus GN=I79_014638 PE=3 SV=1 - [G3HUM5_CRIGR]	252.04	0.057	1	2	3	21	824	91.8	5.54
Q3SZC0	Enhancer of rudimentary homolog OS=Bos taurus GN=ERH PE=3 SV=1 - [ERH_BOVIN]	634.55	0.4712	2	4	4	20	104	12.3	5.92
Q3T0E7	Serine/threonine-protein phosphatase PP1-alpha catalytic subunit OS=Bos taurus GN=PPP1CA PE=2 SV=1 - [PP1A_BOVIN]	385.03	0.2818	6	7	7	20	330	37.5	6.33
P79136-2	Isoform Beta-2 of F-actin-capping protein subunit beta OS=Bos taurus GN=CAPZB - [CAPZB_BOVIN]	334.54	0.375	3	6	6	20	272	30.6	6
Q28141	ATP-dependent RNA helicase A OS=Bos taurus GN=DHX9 PE=2 SV=1 - [DHX9_BOVIN]	503.27	0.0389	1	4	4	20	1287	141.9	6.89
Q3T0L2	Endoplasmic reticulum resident protein 44 OS=Bos taurus GN=ERP44 PE=2 SV=1 - [ERP44_BOVIN]	408.42	0.1084	1	2	4	20	406	46.8	5.31
G3HX39	Phosphoglycerate kinase OS=Cricetulus griseus GN=I79_015556 PE=3 SV=1 - [G3HX39_CRIGR]	354.37	0.3641	1	1	7	20	195	21	6.4
G3IFV3	Exportin-1 OS=Cricetulus griseus GN=I79_022627 PE=4 SV=1 - [G3IFV3_CRIGR]	304.36	0.0996	1	7	7	20	773	88.8	6.24
G3HEQ3	Ran-specific GTPase-activating protein OS=Cricetulus griseus GN=I79_009045 PE=4 SV=1 - [G3HEQ3_CRIGR]	365.39	0.3818	2	6	6	20	220	25.2	5.16
G3I863	Ephrin type-A receptor 2 OS=Cricetulus griseus GN=I79_019726 PE=4 SV=1 - [G3I863_CRIGR]	181.8	0.086	9	6	7	20	942	105.2	6.47
G3IDT6	Protein disulfide-isomerase A4 OS=Cricetulus griseus GN=I79_021872 PE=3 SV=1 - [G3IDT6_CRIGR]	463.63	0.1184	2	5	5	20	642	72.5	5.17
G3HPV5	Histone H1.5 OS=Cricetulus griseus GN=I79_012826 PE=3 SV=1 - [G3HPV5_CRIGR]	386.5	0.0991	2	1	3	20	222	22.4	10.92
G3I7K9	Collagen alpha-1(IV) chain OS=Cricetulus griseus GN=I79_019500 PE=4 SV=1 - [G3I7K9_CRIGR]	335.37	0.0248	2	3	3	20	1614	160.8	7.68
G3I5A4	Annexin OS=Cricetulus griseus GN=I79_018648 PE=3 SV=1 - [G3I5A4_CRIGR]	257.86	0.1963	2	5	5	20	321	36	5.05
G3IJ98	Heterogeneous nuclear ribonucleoprotein A3 OS=Cricetulus griseus GN=I79_023931 PE=4 SV=1 - [G3IJ98_CRIGR]	288.4	0.2114	3	2	4	20	175	20	6.01
Q08DM8	Translin OS=Bos taurus GN=TSN PE=2 SV=1 - [TSN_BOVIN]	115.12	0.1667	2	3	3	20	228	26.2	6.44
G3H5W5	LIM and SH3 domain protein 1 OS=Cricetulus griseus GN=I79_005710 PE=4 SV=1 - [G3H5W5_CRIGR]	395.8	0.2335	2	4	4	20	227	25.8	5.95
G3I004	40S ribosomal protein S11 OS=Cricetulus griseus GN=I79_016673 PE=3 SV=1 - [G3I004_CRIGR]	69.7	0.3418	3	5	5	19	158	18.4	10.3
G3HLZ2	Proteasome activator complex subunit 3 OS=Cricetulus griseus GN=I79_011736 PE=4 SV=1 - [G3HLZ2_CRIGR]	339.05	0.2717	2	6	6	19	254	29.5	5.95
A0JND2	Keratin, type II cytoskeletal 80 OS=Bos taurus GN=KRT80 PE=2 SV=1 - [K2C80_BOVIN]	575.67	0.0498	2	1	2	19	422	47.4	5.31
Q2KI42	26S proteasome non-ATPase regulatory subunit 11 OS=Bos taurus GN=PSMD11 PE=2 SV=3 - [PSD11_BOVIN]	299.55	0.1801	3	7	7	19	422	47.4	6.48
Q9TT36	Thyroxine-binding globulin OS=Bos taurus GN=SERPINA7 PE=2 SV=1 - [THBG_BOVIN]	469.82	0.1411	2	5	5	19	411	46	5.72
A5PK61	Histone H3.3C OS=Bos taurus GN=H3F3C PE=2 SV=1 - [H3C_BOVIN]	272.05	0.3529	11	1	3	19	136	15.4	11.49
Q3SZH7	Leukotriene A-4 hydrolase OS=Bos taurus GN=LTA4H PE=2 SV=3 - [LKHA4_BOVIN]	395.28	0.1997	1	2	9	19	611	69.3	6.37
Q5E966	Eukaryotic translation initiation factor 3 subunit I OS=Bos taurus GN=EIF3I PE=2 SV=1 - [EIF3I_BOVIN]	357.25	0.2092	2	6	6	19	325	36.4	5.64
G3HP24	Isoleucyl-tRNA synthetase, cytoplasmic OS=Cricetulus griseus GN=I79_012527 PE=3 SV=1 - [G3HP24_CRIGR]	80.47	0.0555	1	6	6	19	1262	144	6.47
G3HCK9	Far upstream element-binding protein 2 OS=Cricetulus griseus GN=I79_008220 PE=4 SV=1 - [G3HCK9_CRIGR]	407.93	0.1366	1	6	6	19	593	62.2	7.72
G3HE84	Microtubule-associated protein RP/EB family member 1 OS=Cricetulus griseus GN=I79_008861 PE=4 SV=1 - [G3HE84_CRIGR]	349.82	0.3321	4	7	7	19	268	30	5.22
G3GWF4	Heat shock protein 105 kDa (Fragment) OS=Cricetulus griseus GN=I79_002075 PE=3 SV=1 - [G3GWF4_CRIGR]	313.26	0.0938	3	5	6	19	778	87.9	5.85
G3I5N6	Insulin-like growth factor-binding protein 4 OS=Cricetulus griseus GN=I79_018789 PE=4 SV=1 - [G3I5N6_CRIGR]	397.03	0.2165	2	5	5	19	254	27.7	7.14
G3I310	26S proteasome non-ATPase regulatory subunit 2 OS=Cricetulus griseus GN=I79_017809 PE=4 SV=1 - [G3I310_CRIGR]	339.45	0.0913	1	3	6	19	657	72.9	4.87
G3H1D5	Retinoid-inducible serine carboxypeptidase OS=Cricetulus griseus GN=I79_003960 PE=4 SV=1 - [G3H1D5_CRIGR]	627.75	0.1297	1	5	5	19	455	51.2	5.5
G3IJD1	Putative ATP-dependent RNA helicase DDX17 OS=Cricetulus griseus GN=I79_023964 PE=3 SV=1 - [G3IJD1_CRIGR]	431.58	0.112	1	2	6	19	652	72.6	8.68
G3HAQ2	Eukaryotic translation initiation factor 6 OS=Cricetulus griseus GN=Eif6 PE=1 SV=1 - [G3HAQ2_CRIGR]	558.42	0.2286	2	4	4	19	245	26.6	4.74
G3GTE4	Growth factor receptor-bound protein 2 OS=Cricetulus griseus GN=I79_000924 PE=4 SV=1 - [G3GTE4_CRIGR]	47.74	0.2765	1	6	6	18	217	25.2	6.32
A6QLG5	40S ribosomal protein S9 OS=Bos taurus GN=RPS9 PE=2 SV=1 - [RS9_BOVIN]	188.33	0.134	3	4	4	18	194	22.6	10.65
Q9XSK7	Hepatoma-derived growth factor OS=Bos taurus GN=HDGF PE=2 SV=1 - [HDGF_BOVIN]	299.24	0.2636	1	2	5	18	239	26.6	4.73
A7YW98	Arginine--tRNA ligase, cytoplasmic OS=Bos taurus GN=RARS PE=2 SV=1 - [SYRC_BOVIN]	510.65	0.0712	1	1	4	18	660	75.5	6.87
Q2KJE5	Glyceraldehyde-3-phosphate dehydrogenase, testis-specific OS=Bos taurus GN=GAPDHS PE=2 SV=1 - [G3PT_BOVIN]	310.38	0.0962	3	1	3	18	395	43.3	8.12
P33097	Aspartate aminotransferase, cytoplasmic OS=Bos taurus GN=GOT1 PE=1 SV=3 - [AATC_BOVIN]	148.12	0.1574	1	3	6	18	413	46.4	7.49
G3GRX4	Coactosin-like protein OS=Cricetulus griseus GN=I79_000269 PE=4 SV=1 - [G3GRX4_CRIGR]	389.74	0.4014	2	4	4	18	142	15.9	5.4
G3GRR8	60S ribosomal protein L13 OS=Cricetulus griseus GN=I79_000212 PE=3 SV=1 - [G3GRR8_CRIGR]	307.01	0.1495	2	3	3	18	194	22.4	11.78
G3H3W4	Insulin-degrading enzyme OS=Cricetulus griseus GN=I79_004954 PE=3 SV=1 - [G3H3W4_CRIGR]	168.28	0.0777	2	7	7	18	978	113	6.27
G3I6P1	Glyceraldehyde-3-phosphate dehydrogenase OS=Cricetulus griseus GN=I79_019168 PE=3 SV=1 - [G3I6P1_CRIGR]	411.9	0.1304	3	2	4	18	345	36.9	7.77
G3I5Z5	Prostaglandin reductase 1 OS=Cricetulus griseus GN=I79_018906 PE=4 SV=1 - [G3I5Z5_CRIGR]	510.54	0.1063	1	4	4	18	395	42.6	6.27
G3I936	Epididymal secretory protein E1 OS=Cricetulus griseus GN=I79_020069 PE=4 SV=1 - [G3I936_CRIGR]	194.97	0.2013	1	3	3	18	149	16.5	7.97
G3H5W0	Proteasome subunit beta type OS=Cricetulus griseus GN=I79_005704 PE=3 SV=1 - [G3H5W0_CRIGR]	601.34	0.3814	4	6	6	18	194	21.9	6.55
G3HGW7	40S ribosomal protein S21 OS=Cricetulus griseus GN=I79_009859 PE=3 SV=1 - [G3HGW7_CRIGR]	302.67	0.6024	4	4	4	18	83	9.1	8.32
P12269	Inosine-5'-monophosphate dehydrogenase 2 OS=Cricetulus griseus GN=IMPDH2 PE=1 SV=1 - [IMDH2_CRIGR]	273.56	0.1946	2	7	7	18	514	55.9	7.27
G3HFZ9	Crk-like protein OS=Cricetulus griseus GN=I79_009517 PE=4 SV=1 - [G3HFZ9_CRIGR]	404.18	0.2607	1	6	6	18	303	33.8	6.74
Q3ZBF7	Prostaglandin E synthase 3 OS=Bos taurus GN=PTGES3 PE=1 SV=1 - [TEBP_BOVIN]	106.18	0.2438	2	3	3	17	160	18.7	4.54
Q3T0X6	40S ribosomal protein S16 OS=Bos taurus GN=RPS16 PE=2 SV=3 - [RS16_BOVIN]	244.63	0.3767	4	7	7	17	146	16.4	10.21
G3H8F9	Transforming protein RhoA OS=Cricetulus griseus GN=I79_006659 PE=3 SV=1 - [G3H8F9_CRIGR]	235.23	0.4352	4	6	6	17	193	21.8	6.1
G3I388	28 kDa heat-and acid-stable phosphoprotein OS=Cricetulus griseus GN=I79_017889 PE=4 SV=1 - [G3I388_CRIGR]	209.64	0.2265	1	4	4	17	181	20.6	7.39
Q148H8	Keratin, type II cytoskeletal 72 OS=Bos taurus GN=KRT72 PE=2 SV=1 - [K2C72_BOVIN]	237.07	0.0458	1	1	3	17	524	56.9	7.68
A3KN27	Keratin, type II cytoskeletal 74 OS=Bos taurus GN=KRT74 PE=2 SV=1 - [K2C74_BOVIN]	243.1	0.0273	1	1	3	17	550	59.9	7.93
A6QPQ2	Serpin A3-8 OS=Bos taurus GN=SERPINA3-8 PE=2 SV=1 - [SPA38_BOVIN]	519.03	0.1148	1	2	4	17	418	46.9	6.13
Q3ZBD7	Glucose-6-phosphate isomerase OS=Bos taurus GN=GPI PE=2 SV=4 - [G6PI_BOVIN]	610.86	0.1454	1	4	5	17	557	62.8	7.71
Q9XSG3	Isocitrate dehydrogenase [NADP] cytoplasmic OS=Bos taurus GN=IDH1 PE=2 SV=1 - [IDHC_BOVIN]	287.27	0.1232	2	1	5	17	414	46.8	6.55
G3GZ85	Nuclease domain-containing protein 1 OS=Cricetulus griseus GN=I79_003116 PE=4 SV=1 - [G3GZ85_CRIGR]	384.51	0.0824	2	7	7	17	886	99.7	6.96
G3HV39	Poly(RC)-binding protein 2 OS=Cricetulus griseus GN=I79_014816 PE=4 SV=1 - [G3HV39_CRIGR]	609.05	0.1602	5	2	4	17	362	38.2	6.79
G3GUB8	Integrin alpha-6 OS=Cricetulus griseus GN=I79_001272 PE=3 SV=1 - [G3GUB8_CRIGR]	489.4	0.0933	1	7	7	17	890	98.9	6.05
G3I3Z5	Coronin OS=Cricetulus griseus GN=I79_018166 PE=3 SV=1 - [G3I3Z5_CRIGR]	270.67	0.0868	1	5	5	17	484	53.8	5.78
G3H3P8	Beta-hexosaminidase OS=Cricetulus griseus GN=I79_004877 PE=3 SV=1 - [G3H3P8_CRIGR]	118.69	0.1383	3	6	6	17	528	60.6	6.48
G3H303	Proteasome subunit beta type OS=Cricetulus griseus GN=I79_004608 PE=3 SV=1 - [G3H303_CRIGR]	369.57	0.3523	2	6	6	17	264	29.2	5.47
G3I9D3	Proteasome subunit beta type OS=Cricetulus griseus GN=I79_020170 PE=3 SV=1 - [G3I9D3_CRIGR]	153.76	0.0794	2	3	3	17	277	29.9	7.97
G3GYP7	Alcohol dehydrogenase [NADP+] OS=Cricetulus griseus GN=I79_002952 PE=4 SV=1 - [G3GYP7_CRIGR]	359.81	0.2377	2	5	6	17	324	36.5	7.12
G3II02	Serine/threonine-protein phosphatase 2A regulatory subunit B' (Fragment) OS=Cricetulus griseus GN=I79_023463 PE=4 SV=1 - [G3II02_CRIGR]	389.1	0.1278	2	2	2	17	180	20.4	6.52
G3HPF1	Small nuclear ribonucleoprotein Sm D2 OS=Cricetulus griseus GN=I79_012663 PE=4 SV=1 - [G3HPF1_CRIGR]	240.17	0.1852	2	2	2	17	108	12.3	9.67
G3ILV6	Rab GDP dissociation inhibitor beta OS=Cricetulus griseus GN=I79_024878 PE=4 SV=1 - [G3ILV6_CRIGR]	377.64	0.6545	1	1	6	17	110	12.6	4.73
G3HT18	Nucleosome assembly protein 1-like 1 OS=Cricetulus griseus GN=I79_014020 PE=3 SV=1 - [G3HT18_CRIGR]	147.76	0.1472	2	4	6	17	231	27.1	4.72
G3GVT2	Far upstream element-binding protein 1 OS=Cricetulus griseus GN=I79_001831 PE=4 SV=1 - [G3GVT2_CRIGR]	240.27	0.1604	2	6	6	17	449	47.7	8.48
G3IHC7	Protein arginine N-methyltransferase 1 OS=Cricetulus griseus GN=I79_023216 PE=4 SV=1 - [G3IHC7_CRIGR]	285.71	0.2153	1	5	5	17	353	40.5	5.6
Q32PD5	40S ribosomal protein S19 OS=Bos taurus GN=RPS19 PE=2 SV=3 - [RS19_BOVIN]	204.74	0.2828	2	5	5	16	145	16.1	10.32
G3HSF3	Proteasome subunit alpha type OS=Cricetulus griseus GN=I79_013784 PE=3 SV=1 - [G3HSF3_CRIGR]	343.9	0.3974	1	6	6	16	234	25.9	7.43
P61603	10 kDa heat shock protein, mitochondrial OS=Bos taurus GN=HSPE1 PE=3 SV=2 - [CH10_BOVIN]	182.03	0.4314	2	4	4	16	102	10.9	8.92
Q5E9E6	60S ribosomal protein L10a OS=Bos taurus GN=RPL10A PE=2 SV=3 - [RL10A_BOVIN]	138.07	0.2719	2	4	4	16	217	24.8	9.94
G3HCT4	Putative ATP-dependent RNA helicase DDX5 OS=Cricetulus griseus GN=I79_008300 PE=3 SV=1 - [G3HCT4_CRIGR]	331.32	0.0878	1	1	5	16	615	69.2	8.92
P56652	Inter-alpha-trypsin inhibitor heavy chain H3 OS=Bos taurus GN=ITIH3 PE=1 SV=2 - [ITIH3_BOVIN]	160.36	0.0864	1	8	8	16	891	99.5	5.9
F1MMS9	Integrin alpha-3 OS=Bos taurus GN=ITGA3 PE=3 SV=1 - [ITA3_BOVIN]	278.02	0.0352	1	1	4	16	1050	116.3	6.6
Q3SZC6	Acidic leucine-rich nuclear phosphoprotein 32 family member B OS=Bos taurus GN=ANP32B PE=2 SV=1 - [AN32B_BOVIN]	247.04	0.1609	4	2	5	16	261	29.9	4.08
Q29RL9	Transcription elongation factor A protein 1 OS=Bos taurus GN=TCEA1 PE=2 SV=1 - [TCEA1_BOVIN]	305.31	0.1495	3	4	4	16	301	33.9	8.38
A6H7B5	COP9 signalosome complex subunit 3 OS=Bos taurus GN=COPS3 PE=2 SV=1 - [CSN3_BOVIN]	387.97	0.13	2	4	4	16	423	47.8	6.65
G3HSX8	Biglycan OS=Cricetulus griseus GN=I79_013977 PE=4 SV=1 - [G3HSX8_CRIGR]	119.05	0.1003	2	4	4	16	369	41.6	7.31
G3IEU2	Protein DJ-1 OS=Cricetulus griseus GN=I79_022246 PE=4 SV=1 - [G3IEU2_CRIGR]	306.64	0.2804	1	3	5	16	189	19.9	6.79
G3IE25	Clathrin light chain A OS=Cricetulus griseus GN=I79_021967 PE=4 SV=1 - [G3IE25_CRIGR]	202.14	0.3286	5	4	4	16	140	16.3	4.98
G3IJB6	Protein RCC2 OS=Cricetulus griseus GN=I79_023949 PE=4 SV=1 - [G3IJB6_CRIGR]	99.11	0.1678	1	4	4	16	292	31.9	7.05
G3HKU9	Cadherin-3 OS=Cricetulus griseus GN=I79_011331 PE=3 SV=1 - [G3HKU9_CRIGR]	717.65	0.0417	1	2	3	16	792	87.2	4.7
G3GUL4	CD9 antigen OS=Cricetulus griseus GN=I79_001377 PE=4 SV=1 - [G3GUL4_CRIGR]	211.44	0.1384	1	3	3	16	159	17.7	6.73
G3HSH4	60S ribosomal protein L24 OS=Cricetulus griseus GN=I79_013806 PE=4 SV=1 - [G3HSH4_CRIGR]	132.96	0.0727	2	1	1	16	110	13	11.05
G3H5D5	Acyl-CoA-binding protein OS=Cricetulus griseus GN=I79_005522 PE=4 SV=1 - [G3H5D5_CRIGR]	230.07	0.2185	2	2	2	16	119	13.5	9.31
G3IDN7	Protein FAM3C OS=Cricetulus griseus GN=I79_021820 PE=4 SV=1 - [G3IDN7_CRIGR]	443.87	0.2247	2	4	4	16	227	24.7	8.29
G3H6S8	Inorganic pyrophosphatase OS=Cricetulus griseus GN=I79_006047 PE=4 SV=1 - [G3H6S8_CRIGR]	572.02	0.2158	2	6	6	16	329	37	5.34
G3H1M4	Eukaryotic translation initiation factor 2 subunit 1 OS=Cricetulus griseus GN=I79_004073 PE=4 SV=1 - [G3H1M4_CRIGR]	256.34	0.2286	2	6	6	16	315	36.1	5.14
G3H6Y5	Peptidyl-prolyl cis-trans isomerase OS=Cricetulus griseus GN=I79_006109 PE=4 SV=1 - [G3H6Y5_CRIGR]	560.4	0.7342	1	2	3	16	79	8.8	7.42
G3H5Q2	Epithelial cell adhesion molecule (Fragment) OS=Cricetulus griseus GN=I79_005638 PE=4 SV=1 - [G3H5Q2_CRIGR]	234.29	0.1833	1	3	3	16	240	26.5	6
Q28178	Thrombospondin-1 OS=Bos taurus GN=THBS1 PE=2 SV=2 - [TSP1_BOVIN]	187.43	0.0462	5	5	5	15	1170	129.5	4.97
G3I2E9	Ras-related protein Rab-1B OS=Cricetulus griseus GN=I79_017591 PE=3 SV=1 - [G3I2E9_CRIGR]	245.78	0.194	31	1	3	15	201	22.2	5.73
G3HC31	Protein S100-A6 OS=Cricetulus griseus GN=I79_008074 PE=4 SV=1 - [G3HC31_CRIGR]	260.13	0.6742	1	5	5	15	89	10	5.48
Q2KIT0	Protein HP-20 homolog OS=Bos taurus PE=2 SV=1 - [HP20_BOVIN]	357.44	0.2984	1	4	4	15	191	20.6	8.59
Q5E9A1	Nascent polypeptide-associated complex subunit alpha OS=Bos taurus GN=NACA PE=1 SV=1 - [NACA_BOVIN]	971.34	0.1302	2	2	2	15	215	23.4	4.56
Q2T9P4	Nuclear autoantigenic sperm protein OS=Bos taurus GN=NASP PE=2 SV=2 - [NASP_BOVIN]	47.5	0.1042	1	6	6	15	777	83.6	4.34
Q2KJ46	26S proteasome non-ATPase regulatory subunit 3 OS=Bos taurus GN=PSMD3 PE=2 SV=1 - [PSMD3_BOVIN]	131.16	0.1348	2	5	6	15	534	60.9	8.6
G3HDZ7	Integrin alpha-1 (Fragment) OS=Cricetulus griseus GN=I79_008766 PE=3 SV=1 - [G3HDZ7_CRIGR]	328.74	0.0297	2	5	5	15	1854	204.1	5.58
G3I680	Tumor-associated calcium signal transducer 2 OS=Cricetulus griseus GN=I79_018992 PE=4 SV=1 - [G3I680_CRIGR]	278.66	0.1352	1	4	4	15	318	35.8	8.6
G3GYV4	Ribosome biogenesis protein WDR12 OS=Cricetulus griseus GN=Wdr12 PE=3 SV=1 - [G3GYV4_CRIGR]	76.77	0.0993	2	3	3	15	423	47.6	5.8
G3HJS1	Spectrin beta chain, brain 1 OS=Cricetulus griseus GN=I79_010920 PE=4 SV=1 - [G3HJS1_CRIGR]	166.68	0.111	1	7	7	15	820	94.5	5.95
G3HBJ9	Methionine aminopeptidase 2 OS=Cricetulus griseus GN=Metap2 PE=3 SV=1 - [G3HBJ9_CRIGR]	271.32	0.1527	2	5	5	15	478	52.9	5.82
A4FV54	Ras-related protein Rab-8A OS=Bos taurus GN=RAB8A PE=2 SV=1 - [RAB8A_BOVIN]	218.3	0.1353	32	1	3	15	207	23.7	9.06
G3HMG1	40S ribosomal protein S13 OS=Cricetulus griseus GN=I79_011923 PE=4 SV=1 - [G3HMG1_CRIGR]	286.96	0.1515	3	2	2	15	132	15.2	10.32
Q3ZCK1	Eukaryotic translation initiation factor 3 subunit L OS=Bos taurus GN=EIF3L PE=2 SV=1 - [EIF3L_BOVIN]	485.36	0.1064	2	4	4	15	564	66.7	6.34
G3HCW9	Peroxiredoxin-2 OS=Cricetulus griseus GN=I79_008337 PE=4 SV=1 - [G3HCW9_CRIGR]	355.47	0.2374	2	5	5	15	198	21.8	5.59
G3H4V1	Septin-2 OS=Cricetulus griseus GN=I79_005314 PE=3 SV=1 - [G3H4V1_CRIGR]	606.11	0.2897	2	6	6	15	321	37.1	6.18
G3HC29	Protein S100-A4 OS=Cricetulus griseus GN=I79_008072 PE=4 SV=1 - [G3HC29_CRIGR]	269.39	0.1683	1	1	2	15	101	11.8	5.31
G3GRB1	Calpain-2 catalytic subunit OS=Cricetulus griseus GN=I79_000054 PE=4 SV=1 - [G3GRB1_CRIGR]	103.86	0.0973	2	5	5	15	668	75.9	5.33
G3IAP3	Connective tissue growth factor OS=Cricetulus griseus GN=I79_020669 PE=4 SV=1 - [G3IAP3_CRIGR]	192.08	0.1897	2	7	7	15	348	38.1	7.94
G3HV18	60S ribosomal protein L12 OS=Cricetulus griseus GN=I79_014791 PE=3 SV=1 - [G3HV18_CRIGR]	436.01	0.3731	1	2	3	15	134	14.7	9.55
Q3ZBH8	40S ribosomal protein S20 OS=Bos taurus GN=RPS20 PE=3 SV=1 - [RS20_BOVIN]	104.8	0.2857	2	4	4	14	119	13.4	9.94
Q2NL22	Eukaryotic initiation factor 4A-III OS=Bos taurus GN=EIF4A3 PE=2 SV=3 - [IF4A3_BOVIN]	295.27	0.1363	3	3	6	14	411	46.8	6.73
Q32PJ2	Apolipoprotein A-IV OS=Bos taurus GN=APOA4 PE=2 SV=1 - [APOA4_BOVIN]	137.59	0.2132	2	6	6	14	380	43	5.4
Q3Y5Z3	Adiponectin OS=Bos taurus GN=ADIPOQ PE=1 SV=1 - [ADIPO_BOVIN]	369.57	0.1917	1	4	4	14	240	26.1	5.74
Q5E964	26S proteasome non-ATPase regulatory subunit 13 OS=Bos taurus GN=PSMD13 PE=2 SV=1 - [PSD13_BOVIN]	260.61	0.1888	2	5	6	14	376	42.8	5.69
G3HIP2	Heterogeneous nuclear ribonucleoprotein R OS=Cricetulus griseus GN=I79_010517 PE=4 SV=1 - [G3HIP2_CRIGR]	109.49	0.0774	1	1	5	14	633	70.9	8.13
P63009	AP-2 complex subunit beta OS=Bos taurus GN=AP2B1 PE=1 SV=2 - [AP2B1_BOVIN]	246.37	0.0566	4	5	5	14	937	104.5	5.38
G3IE22	Aldo-keto reductase family 1 member B10 OS=Cricetulus griseus GN=I79_021964 PE=4 SV=1 - [G3IE22_CRIGR]	270.43	0.1264	1	2	4	14	277	31.5	9.1
G3HP71	Heterogeneous nuclear ribonucleoprotein H (Fragment) OS=Cricetulus griseus GN=I79_012577 PE=4 SV=1 - [G3HP71_CRIGR]	262.01	0.1518	4	2	4	14	415	45.2	7.59
G3GVX2	Destrin OS=Cricetulus griseus GN=I79_001877 PE=4 SV=1 - [G3GVX2_CRIGR]	263.67	0.2606	2	4	4	14	165	18.6	7.69
G3HIY9	Glutamate--cysteine ligase catalytic subunit OS=Cricetulus griseus GN=I79_010621 PE=4 SV=1 - [G3HIY9_CRIGR]	220.18	0.0822	1	4	4	14	584	66.4	5.52
G3H7V9	DNA replication licensing factor MCM2 OS=Cricetulus griseus GN=I79_006453 PE=3 SV=1 - [G3H7V9_CRIGR]	194.5	0.0818	2	6	6	14	905	102.1	5.59
G3HRJ1	FACT complex subunit SSRP1 OS=Cricetulus griseus GN=I79_013463 PE=4 SV=1 - [G3HRJ1_CRIGR]	240.69	0.0508	1	4	4	14	709	81	6.87
G3HNR0	Flavin reductase OS=Cricetulus griseus GN=I79_012403 PE=4 SV=1 - [G3HNR0_CRIGR]	74.2	0.4722	1	2	2	14	72	8.1	8.25
G3GSP0	Uridine 5'-monophosphate synthase OS=Cricetulus griseus GN=I79_000657 PE=3 SV=1 - [G3GSP0_CRIGR]	326.86	0.0917	1	4	4	14	480	52.2	6.9
G3H609	Glutathione reductase, mitochondrial OS=Cricetulus griseus GN=I79_005762 PE=4 SV=1 - [G3H609_CRIGR]	342.61	0.1073	1	3	3	14	410	44.9	6.8
G3I3W4	S-formylglutathione hydrolase OS=Cricetulus griseus GN=I79_018133 PE=4 SV=1 - [G3I3W4_CRIGR]	162.96	0.1099	2	2	2	14	282	31.3	6.9
G3H559	Alpha-mannosidase 2 OS=Cricetulus griseus GN=I79_005430 PE=4 SV=1 - [G3H559_CRIGR]	393.66	0.0673	1	6	6	14	1099	125.3	7.55
G3IF40	Carbonyl reductase [NADPH] 1 OS=Cricetulus griseus GN=I79_022353 PE=3 SV=1 - [G3IF40_CRIGR]	194.7	0.1535	7	3	3	14	241	26.7	7.75
G3H6C5	Hsp90 co-chaperone Cdc37 OS=Cricetulus griseus GN=I79_005880 PE=4 SV=1 - [G3H6C5_CRIGR]	234.85	0.1557	3	4	4	14	379	44.4	5.34
G3HY75	Serine/threonine-protein phosphatase 2A 55 kDa regulatory subunit B OS=Cricetulus griseus GN=I79_015996 PE=3 SV=1 - [G3HY75_CRIGR]	385.12	0.1379	3	5	5	14	457	52.9	6.49
Q0VFX8	Cysteine-rich protein 2 OS=Bos taurus GN=CRIP2 PE=2 SV=1 - [CRIP2_BOVIN]	428.43	0.0769	2	1	1	14	208	22.6	8.72
G3I366	Prolyl endopeptidase OS=Cricetulus griseus GN=I79_017867 PE=4 SV=1 - [G3I366_CRIGR]	200.35	0.1027	1	3	4	14	555	62.4	6.18
G3HIM4	Cell division control protein 42-like OS=Cricetulus griseus GN=I79_010498 PE=3 SV=1 - [G3HIM4_CRIGR]	266.99	0.267	3	3	4	13	191	21.2	6.55
G3HMB9	Histone H2A OS=Cricetulus griseus GN=I79_011871 PE=3 SV=1 - [G3HMB9_CRIGR]	311.31	0.3516	5	1	3	13	128	13.5	10.58
Q3ZCL8	SH3 domain-binding glutamic acid-rich-like protein 3 OS=Bos taurus GN=SH3BGRL3 PE=3 SV=1 - [SH3L3_BOVIN]	88.07	0.5699	1	3	3	13	93	10.4	4.93
G3HQ18	Tetraspanin-14 OS=Cricetulus griseus GN=I79_012907 PE=4 SV=1 - [G3HQ18_CRIGR]	308.42	0.0778	1	2	2	13	270	30.7	6.51
A4FUA8	F-actin-capping protein subunit alpha-1 OS=Bos taurus GN=CAPZA1 PE=2 SV=1 - [CAZA1_BOVIN]	245.72	0.1678	2	2	3	13	286	32.9	5.82
Q28065	C4b-binding protein alpha chain OS=Bos taurus GN=C4BPA PE=2 SV=1 - [C4BPA_BOVIN]	172.22	0.059	1	3	3	13	610	68.8	6.38
Q3T145	Malate dehydrogenase, cytoplasmic OS=Bos taurus GN=MDH1 PE=2 SV=3 - [MDHC_BOVIN]	468.55	0.1407	1	1	3	13	334	36.4	6.58
A4FUD3	116 kDa U5 small nuclear ribonucleoprotein component OS=Bos taurus GN=EFTUD2 PE=2 SV=1 - [U5S1_BOVIN]	139.1	0.0628	2	4	5	13	972	109.3	5
Q32LC7	Ras GTPase-activating protein-binding protein 1 OS=Bos taurus GN=G3BP PE=2 SV=1 - [G3BP1_BOVIN]	260.77	0.1484	4	5	5	13	465	52.1	5.52
Q56JV6	Twinfilin-1 OS=Bos taurus GN=TWF1 PE=2 SV=1 - [TWF1_BOVIN]	403.58	0.0857	1	1	3	13	350	40.2	6.96
Q9XTA2	Prolyl endopeptidase OS=Bos taurus GN=PREP PE=2 SV=1 - [PPCE_BOVIN]	279.28	0.0732	1	3	4	13	710	80.6	5.9
G3H2D0	Serine/threonine-protein phosphatase OS=Cricetulus griseus GN=I79_004339 PE=3 SV=1 - [G3H2D0_CRIGR]	491.61	0.3115	6	5	5	13	244	28.1	5.96
G3H8H3	Nck-associated protein 1 (Fragment) OS=Cricetulus griseus GN=I79_006673 PE=4 SV=1 - [G3H8H3_CRIGR]	46.85	0.0526	1	4	4	13	951	109	6.51
G3IFX0	Programmed cell death protein 6 OS=Cricetulus griseus GN=I79_022645 PE=4 SV=1 - [G3IFX0_CRIGR]	87.37	0.1652	2	3	3	13	224	25.4	5.91
G3HVQ0	FRAS1-related extracellular matrix protein 2 OS=Cricetulus griseus GN=I79_015040 PE=4 SV=1 - [G3HVQ0_CRIGR]	217.75	0.0293	1	7	7	13	3104	345.2	5.1
G3H0S7	Beta-2-microglobulin OS=Cricetulus griseus GN=I79_003745 PE=4 SV=1 - [G3H0S7_CRIGR]	100.29	0.3889	1	2	2	13	54	6.4	5.81
G3IBQ9	Phenylalanyl-tRNA synthetase beta chain OS=Cricetulus griseus GN=I79_021090 PE=4 SV=1 - [G3IBQ9_CRIGR]	148.08	0.0781	1	5	5	13	589	65.9	7.05
G3IDD9	40S ribosomal protein S3 OS=Cricetulus griseus GN=I79_021716 PE=3 SV=1 - [G3IDD9_CRIGR]	207.46	0.5214	1	1	4	13	117	12.6	9.28
G3H853	cAMP-dependent protein kinase type I-alpha regulatory subunit OS=Cricetulus griseus GN=I79_006551 PE=4 SV=1 - [G3H853_CRIGR]	98.91	0.168	2	4	4	13	381	43.1	5.35
G3I782	Heterogeneous nuclear ribonucleoprotein D0 OS=Cricetulus griseus GN=I79_019367 PE=4 SV=1 - [G3I782_CRIGR]	256.46	0.2062	2	3	5	13	257	29.3	9.31
G3IB71	Glutaminyl-tRNA synthetase OS=Cricetulus griseus GN=I79_020861 PE=3 SV=1 - [G3IB71_CRIGR]	271.77	0.0477	1	2	3	13	775	87.7	7.15
G3I015	NAD(P)H dehydrogenase [quinone] 1 OS=Cricetulus griseus GN=I79_016687 PE=4 SV=1 - [G3I015_CRIGR]	143.69	0.1095	1	4	4	13	274	31	8.69
G3HBV0	Mesothelin OS=Cricetulus griseus GN=I79_007900 PE=4 SV=1 - [G3HBV0_CRIGR]	119.32	0.0687	1	2	2	13	335	38	5.55
G3IIT5	Nucleosome assembly protein 1-like 4 OS=Cricetulus griseus GN=I79_023761 PE=3 SV=1 - [G3IIT5_CRIGR]	236.68	0.1072	1	1	4	13	345	39.4	4.68
G3H9Z4	Serine-threonine kinase receptor-associated protein OS=Cricetulus griseus GN=I79_007227 PE=4 SV=1 - [G3H9Z4_CRIGR]	266.52	0.1909	2	4	4	13	309	34.1	4.94
G3HB04	Protein disulfide-isomerase A6 OS=Cricetulus griseus GN=I79_007616 PE=4 SV=1 - [G3HB04_CRIGR]	426.88	0.2124	1	4	4	13	259	28.4	4.91
G3HQ02	Thymosin beta-10 OS=Cricetulus griseus GN=I79_012889 PE=4 SV=1 - [G3HQ02_CRIGR]	299.88	0.1818	1	2	2	13	88	10.1	9.33
Q3T035	Actin-related protein 2/3 complex subunit 3 OS=Bos taurus GN=ARPC3 PE=1 SV=3 - [ARPC3_BOVIN]	272.41	0.2247	3	4	4	12	178	20.5	8.59
G3HKX2	Nuclear transport factor 2 OS=Cricetulus griseus GN=I79_011354 PE=4 SV=1 - [G3HKX2_CRIGR]	251.56	0.5039	3	4	4	12	127	14.5	5.38
G3GX96	Actin-related protein 2/3 complex subunit 4 OS=Cricetulus griseus GN=I79_002331 PE=4 SV=1 - [G3GX96_CRIGR]	178.13	0.2321	1	4	4	12	168	19.7	8.43
G3I5R2	40S ribosomal protein S28 OS=Cricetulus griseus GN=I79_018817 PE=3 SV=1 - [G3I5R2_CRIGR]	333.14	0.3043	1	2	2	12	69	7.8	10.7
P05785	Keratin, type I cytoskeletal 14 (Fragment) OS=Bos taurus GN=KRT14 PE=3 SV=1 - [K1C14_BOVIN]	245.54	0.4194	3	1	4	12	93	10.7	6.3
P07589	Fibronectin OS=Bos taurus GN=FN1 PE=1 SV=4 - [FINC_BOVIN]	302.32	0.0359	2	6	6	12	2478	272	5.5
P50448	Factor XIIa inhibitor OS=Bos taurus PE=1 SV=1 - [F12AI_BOVIN]	334.09	0.1346	1	5	5	12	468	51.7	6.67
Q2KIU3	Protein HP-25 homolog 2 OS=Bos taurus PE=2 SV=1 - [HP252_BOVIN]	244.27	0.2372	2	3	4	12	215	22.9	5.33
P04896-2	Isoform Gnas-2 of Guanine nucleotide-binding protein G(s) subunit alpha isoforms short OS=Bos taurus GN=GNAS - [GNAS2_BOVIN]	306.07	0.1263	7	2	3	12	380	44.3	6.13
Q9TU03	Rho GDP-dissociation inhibitor 2 OS=Bos taurus GN=ARHGDIB PE=2 SV=3 - [GDIR2_BOVIN]	263.68	0.085	1	2	2	12	200	22.8	5.2
P11064	Low molecular weight phosphotyrosine protein phosphatase OS=Bos taurus GN=ACP1 PE=1 SV=3 - [PPAC_BOVIN]	247.11	0.2025	3	3	3	12	158	18	7.11
Q2KIY5	Putative phospholipase B-like 2 OS=Bos taurus GN=PLBD2 PE=2 SV=1 - [PLBL2_BOVIN]	296.12	0.039	1	1	2	12	589	65.7	8.24
G3H2K2	Cytochrome c, somatic OS=Cricetulus griseus GN=I79_004417 PE=3 SV=1 - [G3H2K2_CRIGR]	255.54	0.3429	3	3	3	12	105	11.7	9.51
G3H2P3	Beta-galactosidase (Fragment) OS=Cricetulus griseus GN=I79_004461 PE=3 SV=1 - [G3H2P3_CRIGR]	470.25	0.06	1	3	3	12	650	73.6	6.95
G3GSW3	Coatomer subunit beta' OS=Cricetulus griseus GN=I79_000735 PE=4 SV=1 - [G3GSW3_CRIGR]	160.26	0.0594	2	4	4	12	791	89.4	5.5
G3HIX6	Tryptophanyl-tRNA synthetase, cytoplasmic OS=Cricetulus griseus GN=I79_010607 PE=3 SV=1 - [G3HIX6_CRIGR]	310.45	0.0842	2	3	3	12	475	53.5	6.42
G3I1Y9	Sulfated glycoprotein 1 OS=Cricetulus griseus GN=I79_017410 PE=4 SV=1 - [G3I1Y9_CRIGR]	108.05	0.1084	1	3	3	12	249	27.4	5.49
G3HF36	Ubiquitin-conjugating enzyme E2 R1 (Fragment) OS=Cricetulus griseus GN=I79_009189 PE=3 SV=1 - [G3HF36_CRIGR]	160.67	0.0307	1	1	1	12	228	25.8	4.53
G3HDE5	Proteasome activator complex subunit 1 OS=Cricetulus griseus GN=I79_008549 PE=4 SV=1 - [G3HDE5_CRIGR]	118.8	0.2326	3	4	4	12	215	24.5	5.44
Q32KR8	[Protein ADP-ribosylarginine] hydrolase OS=Bos taurus GN=ADPRH PE=2 SV=1 - [ADPRH_BOVIN]	199.8	0.0822	1	1	3	12	353	39.1	6.47
G3HJW0	Glyceraldehyde-3-phosphate dehydrogenase OS=Cricetulus griseus GN=I79_010962 PE=4 SV=1 - [G3HJW0_CRIGR]	413.57	0.1478	1	1	2	12	115	12.9	5.06
G3H6K1	Heterogeneous nuclear ribonucleoprotein G OS=Cricetulus griseus GN=I79_005965 PE=4 SV=1 - [G3H6K1_CRIGR]	144.27	0.1094	1	1	4	12	384	41.7	9.2
G3H8F4	Dystroglycan OS=Cricetulus griseus GN=I79_006654 PE=4 SV=1 - [G3H8F4_CRIGR]	126.66	0.0538	2	4	4	12	893	96.8	8.54
G3I8W3	Ephrin type-B receptor 3 OS=Cricetulus griseus GN=I79_019995 PE=4 SV=1 - [G3I8W3_CRIGR]	97.55	0.0656	9	4	5	12	930	102.9	6.93
G3HLP6	60S ribosomal protein L4 OS=Cricetulus griseus GN=I79_011638 PE=4 SV=1 - [G3HLP6_CRIGR]	136.77	0.0559	2	1	1	12	143	16	10.29
G3I767	Liver carboxylesterase OS=Cricetulus griseus GN=I79_019352 PE=4 SV=1 - [G3I767_CRIGR]	32.57	0.0352	1	2	3	12	795	87.3	5.43
G3HTP6	Alpha-enolase OS=Cricetulus griseus GN=I79_014274 PE=4 SV=1 - [G3HTP6_CRIGR]	282.51	0.1626	1	1	2	12	123	13.9	4.94
G3HQ69	Src substrate cortactin OS=Cricetulus griseus GN=I79_012963 PE=4 SV=1 - [G3HQ69_CRIGR]	108.32	0.1545	1	5	5	12	550	61.4	5.4
G3GSH5	ATP-dependent RNA helicase DDX3X OS=Cricetulus griseus GN=I79_000589 PE=3 SV=1 - [G3GSH5_CRIGR]	377.73	0.0498	1	2	3	12	662	73.2	7.18
G3I766	Liver carboxylesterase OS=Cricetulus griseus GN=I79_019351 PE=4 SV=1 - [G3I766_CRIGR]	81.55	0.0642	2	2	3	12	561	62.4	5.97
G3HNA5	Ubiquitin carboxyl-terminal hydrolase isozyme L3 (Fragment) OS=Cricetulus griseus GN=I79_012242 PE=4 SV=1 - [G3HNA5_CRIGR]	274.73	0.2704	1	3	4	12	196	22.4	5.05
G3H6Y6	NSFL1 cofactor p47 OS=Cricetulus griseus GN=I79_006110 PE=4 SV=1 - [G3H6Y6_CRIGR]	509	0.0941	2	2	2	12	372	41	5.2
G3H6E1	Eukaryotic translation initiation factor 3 subunit G OS=Cricetulus griseus GN=Eif3g PE=3 SV=1 - [G3H6E1_CRIGR]	75.02	0.1219	2	3	3	12	320	35.7	5.9
Q58D31	Sorbitol dehydrogenase OS=Bos taurus GN=SORD PE=2 SV=3 - [DHSO_BOVIN]	166.47	0.0478	1	1	1	12	356	38.1	7.46
Q0P5K3	Ubiquitin-conjugating enzyme E2 N OS=Bos taurus GN=UBE2N PE=2 SV=1 - [UBE2N_BOVIN]	308.11	0.2961	2	4	4	11	152	17.1	6.57
Q3MHR5	Serine/arginine-rich splicing factor 2 OS=Bos taurus GN=SRSF2 PE=2 SV=3 - [SRSF2_BOVIN]	428.96	0.1855	1	3	3	11	221	25.5	11.85
G3GTN1	Protein mago nashi-like OS=Cricetulus griseus GN=I79_001016 PE=4 SV=1 - [G3GTN1_CRIGR]	55.2	0.2192	2	3	3	11	146	17.2	6.11
A6QNM8	Probable threonine--tRNA ligase 2, cytoplasmic OS=Bos taurus GN=TARSL2 PE=2 SV=1 - [SYTC2_BOVIN]	137.69	0.0221	2	1	2	11	724	83	6.15
A4IF97	Myosin regulatory light chain 12B OS=Bos taurus GN=MYL12B PE=2 SV=1 - [ML12B_BOVIN]	322.91	0.345	4	4	4	11	171	19.7	4.84
Q5E995	40S ribosomal protein S6 OS=Bos taurus GN=RPS6 PE=2 SV=1 - [RS6_BOVIN]	219.51	0.1406	5	3	3	11	249	28.6	10.84
Q9XSA7	Chloride intracellular channel protein 4 OS=Bos taurus GN=CLIC4 PE=2 SV=3 - [CLIC4_BOVIN]	241.06	0.2213	4	4	4	11	253	28.7	5.78
Q2TBX4	Heat shock 70 kDa protein 13 OS=Bos taurus GN=HSPA13 PE=2 SV=1 - [HSP13_BOVIN]	206.1	0.0403	1	1	2	11	471	51.9	5.3
Q2TA40	Nucleosome assembly protein 1-like 4 OS=Bos taurus GN=NAP1L4 PE=2 SV=1 - [NP1L4_BOVIN]	137.35	0.1036	1	1	4	11	386	44	4.65
A7MBG0	Adenylosuccinate synthetase isozyme 2 OS=Bos taurus GN=ADSS PE=2 SV=2 - [PURA2_BOVIN]	292.53	0.1689	1	3	6	11	456	50.1	6.73
G3HN89	Palmitoyl-protein thioesterase 1 OS=Cricetulus griseus GN=I79_012225 PE=4 SV=1 - [G3HN89_CRIGR]	301.06	0.1242	1	3	3	11	306	34.5	7.85
G3GR90	Isopentenyl-diphosphate Delta-isomerase 1 OS=Cricetulus griseus GN=I79_000033 PE=4 SV=1 - [G3GR90_CRIGR]	141.28	0.2211	3	5	5	11	285	32.7	7.52
Q3SZ90	60S ribosomal protein L13a OS=Bos taurus GN=RPL13A PE=2 SV=3 - [RL13A_BOVIN]	35.95	0.0887	2	2	2	11	203	23.5	11.11
G3I6T1	Putative phospholipase B-like 2 OS=Cricetulus griseus GN=I79_019209 PE=4 SV=1 - [G3I6T1_CRIGR]	123.78	0.0803	1	2	3	11	585	65.5	6.28
G3ILX2	26S proteasome non-ATPase regulatory subunit 13 OS=Cricetulus griseus GN=I79_024894 PE=4 SV=1 - [G3ILX2_CRIGR]	79.77	0.2828	1	2	3	11	99	11.5	7.44
G3I1J6	[Protein ADP-ribosylarginine] hydrolase OS=Cricetulus griseus GN=I79_017258 PE=4 SV=1 - [G3I1J6_CRIGR]	244.03	0.1086	1	2	4	11	350	38.8	6.28
G3HCC0	60S ribosomal protein L27 OS=Cricetulus griseus GN=I79_008127 PE=4 SV=1 - [G3HCC0_CRIGR]	110.12	0.1545	6	2	2	11	110	12.1	10.13
G3HCT1	Importin subunit alpha OS=Cricetulus griseus GN=I79_008297 PE=3 SV=1 - [G3HCT1_CRIGR]	154.55	0.087	1	3	3	11	529	57.8	5.34
G3H0S4	Sorbitol dehydrogenase OS=Cricetulus griseus GN=I79_003742 PE=3 SV=1 - [G3H0S4_CRIGR]	135.45	0.0812	1	3	3	11	357	38.3	7.66
G3ID08	Putative pre-mRNA-splicing factor ATP-dependent RNA helicase DHX15 OS=Cricetulus griseus GN=I79_021569 PE=4 SV=1 - [G3ID08_CRIGR]	267.05	0.0577	1	4	4	11	728	82.8	7.12
G3HUU6	Protein S100-A11 OS=Cricetulus griseus GN=I79_014714 PE=4 SV=1 - [G3HUU6_CRIGR]	252.41	0.29	1	3	3	11	100	11.2	7.08
G3HW66	Multiple inositol polyphosphate phosphatase 1 OS=Cricetulus griseus GN=I79_015216 PE=4 SV=1 - [G3HW66_CRIGR]	125.22	0.1569	1	3	3	11	274	31.6	6.23
G3HAZ0	SLIT-ROBO Rho GTPase-activating protein 2 OS=Cricetulus griseus GN=I79_007602 PE=4 SV=1 - [G3HAZ0_CRIGR]	182.23	0.0676	1	6	6	11	858	98.2	5.96
G3GTC7	Malic enzyme (Fragment) OS=Cricetulus griseus GN=I79_000906 PE=3 SV=1 - [G3GTC7_CRIGR]	219.23	0.1581	1	3	3	11	291	32.7	5.59
G3H4N3	RuvB-like 2 OS=Cricetulus griseus GN=I79_005238 PE=4 SV=1 - [G3H4N3_CRIGR]	215.89	0.2176	1	1	3	11	193	20.9	9.04
G3I3E3	Ubiquitin-conjugating enzyme E2 variant 2 OS=Cricetulus griseus GN=I79_017948 PE=4 SV=1 - [G3I3E3_CRIGR]	133.37	0.3846	3	1	2	11	65	7.2	9.38
G3I4E6	Inositol monophosphatase OS=Cricetulus griseus GN=I79_018324 PE=4 SV=1 - [G3I4E6_CRIGR]	311.25	0.0932	2	2	2	11	236	25.6	6.77
G3GYK8	26S protease regulatory subunit 6A OS=Cricetulus griseus GN=I79_002888 PE=3 SV=1 - [G3GYK8_CRIGR]	186.12	0.2415	1	5	5	11	265	29.5	5.8
G3H2Z7	26S proteasome non-ATPase regulatory subunit 4 OS=Cricetulus griseus GN=I79_004602 PE=4 SV=1 - [G3H2Z7_CRIGR]	39.48	0.1184	2	3	3	11	380	41.1	4.81
G3IIB1	Sialate O-acetylesterase OS=Cricetulus griseus GN=I79_023579 PE=4 SV=1 - [G3IIB1_CRIGR]	288.48	0.0727	1	3	3	11	550	61.4	8.22
G3H066	V-type proton ATPase catalytic subunit A OS=Cricetulus griseus GN=I79_003541 PE=3 SV=1 - [G3H066_CRIGR]	421.73	0.0681	2	3	3	11	617	68.3	5.58
G3HRG8	Endoplasmic reticulum resident protein ERp44 (Fragment) OS=Cricetulus griseus GN=I79_013434 PE=4 SV=1 - [G3HRG8_CRIGR]	388.28	0.1434	1	1	2	11	258	29.7	5.33
G3I8H9	Cysteine and histidine-rich domain-containing protein 1 OS=Cricetulus griseus GN=I79_019852 PE=4 SV=1 - [G3I8H9_CRIGR]	295.52	0.2078	2	4	4	11	332	37.4	7.75
G3HXZ3	CD81 antigen OS=Cricetulus griseus GN=I79_015909 PE=4 SV=1 - [G3HXZ3_CRIGR]	285.14	0.1525	1	2	2	11	236	25.8	5.52
P61285	Dynein light chain 1, cytoplasmic OS=Bos taurus GN=DYNLL1 PE=1 SV=1 - [DYL1_BOVIN]	354.06	0.382	2	2	2	10	89	10.4	7.4
G3IKE2	40S ribosomal protein S15a OS=Cricetulus griseus GN=I79_024343 PE=3 SV=1 - [G3IKE2_CRIGR]	122.48	0.1769	5	3	3	10	130	14.8	10.13
G3H1F4	Ribosomal protein L15 OS=Cricetulus griseus GN=I79_003979 PE=3 SV=1 - [G3H1F4_CRIGR]	116.97	0.2059	1	4	4	10	204	24.1	11.62
G3HMS8	60S ribosomal protein L17 OS=Cricetulus griseus GN=I79_012050 PE=3 SV=1 - [G3HMS8_CRIGR]	194	0.1141	3	2	2	10	184	21.4	10.18
Q29423	CD44 antigen OS=Bos taurus GN=CD44 PE=2 SV=1 - [CD44_BOVIN]	118.67	0.0574	2	2	2	10	366	40	6.89
P79134	Annexin A6 OS=Bos taurus GN=ANXA6 PE=1 SV=2 - [ANXA6_BOVIN]	156.94	0.055	1	1	4	10	673	75.9	5.9
Q3SYX9	Actin-related protein 2/3 complex subunit 5 OS=Bos taurus GN=ARPC5 PE=1 SV=3 - [ARPC5_BOVIN]	382.63	0.1656	1	2	2	10	151	16.2	6.18
P45478	Palmitoyl-protein thioesterase 1 OS=Bos taurus GN=PPT1 PE=1 SV=1 - [PPT1_BOVIN]	149.3	0.0425	1	1	1	10	306	34.1	6.79
Q5E9G3	Proteasome activator complex subunit 2 OS=Bos taurus GN=PSME2 PE=1 SV=3 - [PSME2_BOVIN]	186.95	0.0293	1	1	1	10	239	27.4	5.43
P18341	Transforming growth factor beta-1 OS=Bos taurus GN=TGFB1 PE=1 SV=2 - [TGFB1_BOVIN]	213.09	0.0769	1	3	3	10	390	44.4	8.7
Q27954	Coatomer subunit alpha OS=Bos taurus GN=COPA PE=1 SV=1 - [COPA_BOVIN]	109.63	0.0556	2	6	6	10	1224	138.3	7.66
Q2KJG3	Asparagine--tRNA ligase, cytoplasmic OS=Bos taurus GN=NARS PE=2 SV=3 - [SYNC_BOVIN]	150.73	0.0644	2	3	4	10	559	64.4	6.74
Q3B7M9	Glycogen phosphorylase, brain form OS=Bos taurus GN=PYGB PE=2 SV=3 - [PYGB_BOVIN]	128.19	0.0854	1	5	5	10	843	96.3	7.23
G3HDL6	Elongation factor 1-beta OS=Cricetulus griseus GN=I79_008601 PE=3 SV=1 - [G3HDL6_CRIGR]	469.78	0.2311	2	3	3	10	225	24.7	4.67
G3HZE9	Valyl-tRNA synthetase OS=Cricetulus griseus GN=I79_016450 PE=3 SV=1 - [G3HZE9_CRIGR]	321.21	0.0417	1	4	4	10	1488	165.4	7.99
G3HMJ8	60S ribosomal protein L7 OS=Cricetulus griseus GN=I79_011961 PE=4 SV=1 - [G3HMJ8_CRIGR]	177.33	0.1084	4	1	3	10	249	29.2	10.48
G3HX34	60S ribosomal protein L7 OS=Cricetulus griseus GN=I79_015550 PE=4 SV=1 - [G3HX34_CRIGR]	118.78	0.1748	3	1	3	10	143	17	11.34
G3I952	EF-hand domain-containing protein D2 OS=Cricetulus griseus GN=I79_020086 PE=4 SV=1 - [G3I952_CRIGR]	234.71	0.3022	3	1	4	10	139	15.9	5.29
G3GTC9	Phosphoacetylglucosamine mutase OS=Cricetulus griseus GN=I79_000908 PE=3 SV=1 - [G3GTC9_CRIGR]	254.32	0.0554	1	3	3	10	542	59.4	5.99
G3IKW4	GDP-L-fucose synthetase OS=Cricetulus griseus GN=I79_024518 PE=3 SV=1 - [G3IKW4_CRIGR]	362.91	0.0717	1	2	2	10	321	35.8	7.09
G3I3J1	Asparagine synthetase OS=Cricetulus griseus GN=I79_017999 PE=4 SV=1 - [G3I3J1_CRIGR]	271.75	0.1052	2	5	5	10	561	64.3	6.58
Q3MHH4	Glutamine--tRNA ligase OS=Bos taurus GN=QARS PE=2 SV=1 - [SYQ_BOVIN]	109.04	0.0542	1	3	4	10	775	87.6	6.89
G3H942	Histone deacetylase OS=Cricetulus griseus GN=I79_006904 PE=3 SV=1 - [G3H942_CRIGR]	28.48	0.0602	4	3	3	10	482	55.1	5.48
G3H5T7	Chromobox protein-like 1 OS=Cricetulus griseus GN=I79_005678 PE=4 SV=1 - [G3H5T7_CRIGR]	88.72	0.1211	1	2	3	10	289	32.4	5.19
G3I979	40S ribosomal protein S25 (Fragment) OS=Cricetulus griseus GN=I79_020113 PE=4 SV=1 - [G3I979_CRIGR]	175.36	0.2439	6	3	3	10	123	13.5	10.11
G3H0E4	Chondroitin sulfate proteoglycan 4 OS=Cricetulus griseus GN=I79_003599 PE=4 SV=1 - [G3H0E4_CRIGR]	101.94	0.0284	1	6	6	10	2323	251.9	5.68
G3HLR7	Adenosine deaminase OS=Cricetulus griseus GN=I79_011661 PE=3 SV=1 - [G3HLR7_CRIGR]	222.58	0.1267	2	3	3	10	363	40.9	5.92
G3H8A8	Mesencephalic astrocyte-derived neurotrophic factor OS=Cricetulus griseus GN=I79_006608 PE=4 SV=1 - [G3H8A8_CRIGR]	132.01	0.1106	2	2	2	10	217	24.6	8.47
G3GXT2	CAD protein OS=Cricetulus griseus GN=I79_002575 PE=3 SV=1 - [G3GXT2_CRIGR]	222.45	0.0328	1	5	5	10	2225	242.9	6.49
G3HCH0	UPF0556 protein C19orf10-like OS=Cricetulus griseus GN=I79_008180 PE=4 SV=1 - [G3HCH0_CRIGR]	193.19	0.0542	2	1	1	10	166	18	6.3
G3HG69	Hepatoma-derived growth factor OS=Cricetulus griseus GN=I79_009588 PE=4 SV=1 - [G3HG69_CRIGR]	102.01	0.2732	1	1	4	10	205	22.7	4.59
G3GYY2	Caprin-1 OS=Cricetulus griseus GN=I79_003032 PE=4 SV=1 - [G3GYY2_CRIGR]	243.85	0.1037	2	5	5	10	656	73.6	5.2
G3ILX1	Fibroblast growth factor-binding protein 1 OS=Cricetulus griseus GN=I79_024893 PE=4 SV=1 - [G3ILX1_CRIGR]	185.95	0.1815	1	3	3	10	248	27.9	9.17
G3ICK1	Kunitz-type protease inhibitor 1 OS=Cricetulus griseus GN=I79_021399 PE=4 SV=1 - [G3ICK1_CRIGR]	195.53	0.0681	1	3	3	10	499	55.8	5.66
G3HTZ1	Myelin protein P0 OS=Cricetulus griseus GN=I79_014394 PE=4 SV=1 - [G3HTZ1_CRIGR]	330.91	0.032	2	2	2	10	437	48.8	9.51
G3HXU0	Tubulin--tyrosine ligase-like protein 12 OS=Cricetulus griseus GN=I79_015854 PE=4 SV=1 - [G3HXU0_CRIGR]	117.19	0.1099	1	4	4	10	655	75.6	5.92
G3H5G6	Thioredoxin-like protein 1 OS=Cricetulus griseus GN=I79_005547 PE=4 SV=1 - [G3H5G6_CRIGR]	327.51	0.2698	1	3	3	10	189	20.8	4.86
Q3T0F4	40S ribosomal protein S10 OS=Bos taurus GN=RPS10 PE=2 SV=1 - [RS10_BOVIN]	134.05	0.1515	2	2	2	9	165	18.9	10.15
Q56K14	60S acidic ribosomal protein P1 OS=Bos taurus GN=RPLP1 PE=3 SV=1 - [RLA1_BOVIN]	228.6	0.9474	8	4	5	9	114	11.5	4.32
G3I179	26S proteasome non-ATPase regulatory subunit 14 OS=Cricetulus griseus GN=I79_017128 PE=4 SV=1 - [G3I179_CRIGR]	143.3	0.0645	1	2	2	9	310	34.6	6.52
G3I2F5	Barrier-to-autointegration factor OS=Cricetulus griseus GN=I79_017597 PE=4 SV=1 - [G3I2F5_CRIGR]	240.44	0.4831	1	3	3	9	89	10.1	6.09
G3HIY3	40S ribosomal protein S23 OS=Cricetulus griseus GN=I79_010614 PE=3 SV=1 - [G3HIY3_CRIGR]	308.01	0.1608	2	2	2	9	143	15.8	10.49
G3I0Q1	40S ribosomal protein S26 OS=Cricetulus griseus GN=I79_016940 PE=4 SV=1 - [G3I0Q1_CRIGR]	36.76	0.2087	3	1	2	9	115	13	11
Q56JU9-2	Isoform 2 of 40S ribosomal protein S24 OS=Bos taurus GN=RPS24 - [RS24_BOVIN]	191.5	0.1769	3	2	2	9	130	15.1	10.89
G3I0B0	Ras-related protein Rab-11A OS=Cricetulus griseus GN=I79_016788 PE=3 SV=1 - [G3I0B0_CRIGR]	203.67	0.162	3	3	3	9	216	24.4	6.57
G3I6W5	Prefoldin subunit 6 OS=Cricetulus griseus GN=I79_019243 PE=4 SV=1 - [G3I6W5_CRIGR]	230.16	0.0945	2	1	1	9	127	14.4	8.88
Q29RQ1	Complement component C7 OS=Bos taurus GN=C7 PE=2 SV=1 - [CO7_BOVIN]	320	0.0629	1	4	4	9	843	93	7.11
A5D7A0	EF-hand domain-containing protein D2 OS=Bos taurus GN=EFHD2 PE=2 SV=1 - [EFHD2_BOVIN]	232.11	0.1736	3	1	4	9	242	26.9	5.15
Q5E997	F-actin-capping protein subunit alpha-2 OS=Bos taurus GN=CAPZA2 PE=1 SV=3 - [CAZA2_BOVIN]	307.82	0.0839	1	1	2	9	286	33	5.85
P05689	Cathepsin Z OS=Bos taurus GN=CTSZ PE=2 SV=2 - [CATZ_BOVIN]	266.94	0.0888	2	2	2	9	304	33.9	7.01
Q2KIZ8	DNA replication licensing factor MCM6 OS=Bos taurus GN=MCM6 PE=2 SV=1 - [MCM6_BOVIN]	158.49	0.0767	1	1	5	9	821	92.9	5.36
A5PK63	40S ribosomal protein S17 OS=Bos taurus GN=RPS17 PE=2 SV=1 - [RS17_BOVIN]	26.38	0.163	2	2	2	9	135	15.6	9.73
G3I2F2	Splicing factor 3B subunit 2 OS=Cricetulus griseus GN=I79_017595 PE=4 SV=1 - [G3I2F2_CRIGR]	178.08	0.0674	1	4	4	9	935	103.8	5.96
G3HK27	Afadin OS=Cricetulus griseus GN=I79_011045 PE=4 SV=1 - [G3HK27_CRIGR]	83.96	0.0299	1	3	3	9	1605	181.9	5.83
G3HUN1	Ubiquitin carboxyl-terminal hydrolase isozyme L5 OS=Cricetulus griseus GN=I79_014645 PE=4 SV=1 - [G3HUN1_CRIGR]	64.78	0.1064	2	3	3	9	329	37.6	5.41
G3GZQ9	Lactase-phlorizin hydrolase OS=Cricetulus griseus GN=I79_003354 PE=3 SV=1 - [G3GZQ9_CRIGR]	180.28	0.0236	1	1	5	9	2669	301.1	6.11
A7YW45	Protein arginine N-methyltransferase 5 OS=Bos taurus GN=PRMT5 PE=2 SV=1 - [ANM5_BOVIN]	163.28	0.0377	2	2	2	9	637	72.6	6.29
Q27966-3	Isoform 3 of Unconventional myosin-Ic OS=Bos taurus GN=MYO1C - [MYO1C_BOVIN]	138.34	0.0489	3	2	5	9	1044	119.8	9.31
G3H453	Small nuclear ribonucleoprotein-associated protein OS=Cricetulus griseus GN=I79_005053 PE=3 SV=1 - [G3H453_CRIGR]	109.82	0.1031	4	3	3	9	223	22.8	10.86
A6QQ21	COP9 signalosome complex subunit 6 OS=Bos taurus GN=COPS6 PE=2 SV=1 - [CSN6_BOVIN]	43.32	0.0926	2	3	3	9	324	35.9	5.73
G3IIA1	Methylosome protein 50 (Fragment) OS=Cricetulus griseus GN=I79_023569 PE=4 SV=1 - [G3IIA1_CRIGR]	115.53	0.0247	2	1	1	9	283	29.8	4.82
G3H5E5	Ras-related protein Ral-B OS=Cricetulus griseus GN=I79_005532 PE=4 SV=1 - [G3H5E5_CRIGR]	164.16	0.1718	2	5	5	9	227	25.6	6.61
G3HA51	Procollagen-lysine,2-oxoglutarate 5-dioxygenase 3 OS=Cricetulus griseus GN=I79_007293 PE=4 SV=1 - [G3HA51_CRIGR]	114.72	0.0559	1	2	2	9	322	37.6	6.33
G3H485	Coatomer subunit epsilon OS=Cricetulus griseus GN=I79_005085 PE=4 SV=1 - [G3H485_CRIGR]	34.02	0.0649	2	2	2	9	308	34.5	5.12
G3I683	Plasminogen activator inhibitor 1 RNA-binding protein OS=Cricetulus griseus GN=I79_018995 PE=4 SV=1 - [G3I683_CRIGR]	26.04	0.0943	1	2	2	9	212	23.8	5.15
G3HR88	Integral membrane protein 2B OS=Cricetulus griseus GN=I79_013351 PE=4 SV=1 - [G3HR88_CRIGR]	285.57	0.0714	2	2	2	9	266	30.3	5.14
G3H256	26S proteasome non-ATPase regulatory subunit 9 OS=Cricetulus griseus GN=I79_004301 PE=4 SV=1 - [G3H256_CRIGR]	117.34	0.1667	2	3	3	9	222	24.6	6.65
G3H8L7	Ras-related protein Rab-5A OS=Cricetulus griseus GN=I79_006720 PE=3 SV=1 - [G3H8L7_CRIGR]	228.73	0.0512	5	1	1	9	215	23.5	8.15
G3HYI7	Splicing factor U2AF 65 kDa subunit OS=Cricetulus griseus GN=I79_016120 PE=4 SV=1 - [G3HYI7_CRIGR]	152.39	0.1043	1	3	3	9	422	45.7	4.93
G3INU6	UDP-glucose 6-dehydrogenase OS=Cricetulus griseus GN=I79_025636 PE=3 SV=1 - [G3INU6_CRIGR]	210.74	0.117	1	3	3	9	282	30.7	8.07
G3IF52	Nucleobindin-2 OS=Cricetulus griseus GN=I79_022367 PE=4 SV=1 - [G3IF52_CRIGR]	230.82	0.0786	1	3	3	9	420	50.3	5.15
G3IJ29	Eukaryotic translation initiation factor 3 subunit D OS=Cricetulus griseus GN=Eif3d PE=3 SV=1 - [G3IJ29_CRIGR]	269.83	0.0771	2	3	3	9	493	56.9	5.22
G3H8F2	Acylamino-acid-releasing enzyme OS=Cricetulus griseus GN=I79_006652 PE=4 SV=1 - [G3H8F2_CRIGR]	147.47	0.0751	2	5	5	9	732	81.5	5.34
G3HRX0	Sorcin (Fragment) OS=Cricetulus griseus GN=I79_013594 PE=4 SV=1 - [G3HRX0_CRIGR]	97.2	0.094	1	1	1	9	117	13.4	8.48
G3HSA2	Myb-binding protein 1A OS=Cricetulus griseus GN=I79_013731 PE=4 SV=1 - [G3HSA2_CRIGR]	158.67	0.029	1	2	2	9	932	105.1	9.06
G3H7M8	Heterogeneous nuclear ribonucleoprotein U OS=Cricetulus griseus GN=I79_006363 PE=4 SV=1 - [G3H7M8_CRIGR]	153.03	0.0898	1	4	4	9	512	57.6	9.32
G3I2K8	Ribonucleoside-diphosphate reductase subunit M2 OS=Cricetulus griseus GN=I79_017646 PE=4 SV=1 - [G3I2K8_CRIGR]	341.7	0.0282	1	1	1	9	390	45	5.45
G3GUB4	Histone acetyltransferase type B catalytic subunit OS=Cricetulus griseus GN=I79_001268 PE=4 SV=1 - [G3GUB4_CRIGR]	146.32	0.2291	1	3	3	9	179	21.4	8.79
G3GU73	Ras-related protein Rab-35 OS=Cricetulus griseus GN=I79_001225 PE=3 SV=1 - [G3GU73_CRIGR]	182.63	0.1676	23	1	2	9	173	19.9	8.43
G3H0T1	Eukaryotic translation initiation factor 3 subunit J OS=Cricetulus griseus GN=I79_003749 PE=4 SV=1 - [G3H0T1_CRIGR]	390.5	0.2252	2	2	2	9	111	12.6	6.71
G3HIS0	26S proteasome non-ATPase regulatory subunit 6 OS=Cricetulus griseus GN=I79_010547 PE=4 SV=1 - [G3HIS0_CRIGR]	142.84	0.1594	2	5	5	9	389	45.5	5.6
G3HJM9	Neuromodulin OS=Cricetulus griseus GN=I79_010877 PE=4 SV=1 - [G3HJM9_CRIGR]	109.08	0.31	1	3	3	9	200	20.7	4.7
G3H7K6	Carboxymethylenebutenolidase-like OS=Cricetulus griseus GN=I79_006339 PE=4 SV=1 - [G3H7K6_CRIGR]	228.41	0.0571	1	1	1	9	245	27.9	6.93
G3I7T9	Guanine nucleotide-binding protein subunit gamma OS=Cricetulus griseus GN=I79_019587 PE=3 SV=1 - [G3I7T9_CRIGR]	55.74	0.4167	2	2	2	9	72	8	8.97
G3GV42	Asparaginyl-tRNA synthetase, cytoplasmic OS=Cricetulus griseus GN=I79_001573 PE=3 SV=1 - [G3GV42_CRIGR]	188.85	0.1051	1	1	2	9	314	36.6	5.22
Q3ZCH5	Zinc-alpha-2-glycoprotein OS=Bos taurus GN=AZGP1 PE=2 SV=1 - [ZA2G_BOVIN]	43.27	0.1706	1	3	3	9	299	33.8	5.24
G3I6E3	Lin-7-like C OS=Cricetulus griseus GN=I79_019060 PE=4 SV=1 - [G3I6E3_CRIGR]	150.19	0.2081	1	3	3	8	197	21.8	8.43
Q3T0W9	60S ribosomal protein L19 OS=Bos taurus GN=RPL19 PE=2 SV=1 - [RL19_BOVIN]	206.56	0.1276	4	2	2	8	196	23.5	11.47
G3HL16	Splicing factor 3B subunit 1 OS=Cricetulus griseus GN=I79_011401 PE=4 SV=1 - [G3HL16_CRIGR]	271.07	0.0222	1	2	2	8	1304	145.7	7.09
Q3T0D5	60S ribosomal protein L30 OS=Bos taurus GN=RPL30 PE=3 SV=3 - [RL30_BOVIN]	125.98	0.3739	7	3	3	8	115	12.8	9.63
Q3T0Q6	Cellular nucleic acid-binding protein OS=Bos taurus GN=CNBP PE=2 SV=1 - [CNBP_BOVIN]	431.58	0.1706	2	2	2	8	170	18.7	7.71
G3HKD0	Peptidyl-prolyl cis-trans isomerase OS=Cricetulus griseus GN=I79_011150 PE=3 SV=1 - [G3HKD0_CRIGR]	32.99	0.1627	2	2	2	8	166	18.2	7.99
G3H2U6	Splicing factor 3B subunit 4 OS=Cricetulus griseus GN=I79_004549 PE=4 SV=1 - [G3H2U6_CRIGR]	393.22	0.0873	1	2	2	8	424	44.3	8.56
G3I757	ADP-ribosylation factor-like protein 3 OS=Cricetulus griseus GN=I79_019342 PE=3 SV=1 - [G3I757_CRIGR]	129.81	0.0604	2	1	1	8	182	20.5	7.24
Q3ZBY2	Transgelin-3 OS=Bos taurus GN=TAGLN3 PE=2 SV=1 - [TAGL3_BOVIN]	199.12	0.1256	2	1	2	8	199	22.5	7.33
Q2TBQ5	60S ribosomal protein L7a OS=Bos taurus GN=RPL7A PE=2 SV=3 - [RL7A_BOVIN]	48.93	0.2368	18	5	5	8	266	30	10.61
Q7SIB3	Collagen alpha-2(IV) chain (Fragment) OS=Bos taurus GN=COL4A2 PE=1 SV=1 - [CO4A2_BOVIN]	110.71	0.1366	2	2	2	8	227	25	6.61
Q2TBG8	Ubiquitin carboxyl-terminal hydrolase isozyme L3 OS=Bos taurus GN=UCHL3 PE=2 SV=1 - [UCHL3_BOVIN]	121.96	0.0826	1	1	2	8	230	26.2	4.92
Q2TBQ8	6-phosphogluconolactonase OS=Bos taurus GN=PGLS PE=2 SV=1 - [6PGL_BOVIN]	89.22	0.093	1	2	2	8	258	27.5	5.85
A5PK39	Tripeptidyl-peptidase 2 OS=Bos taurus GN=TPP2 PE=2 SV=1 - [TPP2_BOVIN]	98.7	0.0224	2	3	3	8	1249	138.3	6.29
Q05589	Urokinase-type plasminogen activator OS=Bos taurus GN=PLAU PE=2 SV=1 - [UROK_BOVIN]	137.08	0.03	1	2	2	8	433	48.7	8.03
G3I2I9	60S ribosomal protein L3 OS=Cricetulus griseus GN=I79_017622 PE=3 SV=1 - [G3I2I9_CRIGR]	272.5	0.0471	2	2	2	8	403	46.1	10.21
G3HZA8	Glyceraldehyde-3-phosphate dehydrogenase OS=Cricetulus griseus GN=I79_016405 PE=3 SV=1 - [G3HZA8_CRIGR]	341.61	0.1117	8	1	2	8	206	22.4	8.41
G3IP93	Vitronectin OS=Cricetulus griseus GN=I79_025798 PE=4 SV=1 - [G3IP93_CRIGR]	222.57	0.0652	2	1	1	8	230	25.7	4.61
G3HWW8	Syntaxin-binding protein 2 OS=Cricetulus griseus GN=I79_015481 PE=4 SV=1 - [G3HWW8_CRIGR]	126.46	0.0842	1	4	4	8	594	66.6	6.81
G3I319	AP-2 complex subunit mu-1 OS=Cricetulus griseus GN=I79_017819 PE=4 SV=1 - [G3I319_CRIGR]	67.93	0.0716	2	3	3	8	433	49.3	9.54
G3IE04	Pre-mRNA-processing factor 19 OS=Cricetulus griseus GN=I79_021945 PE=4 SV=1 - [G3IE04_CRIGR]	150.17	0.0739	1	1	3	8	487	53.4	6.61
G3HD57	Syntenin-1 OS=Cricetulus griseus GN=I79_008432 PE=4 SV=1 - [G3HD57_CRIGR]	74.71	0.0805	1	2	2	8	298	32.3	7.15
G3H8Q4	Acidic leucine-rich nuclear phosphoprotein 32 family member A OS=Cricetulus griseus GN=I79_006764 PE=4 SV=1 - [G3H8Q4_CRIGR]	320.27	0.2397	2	1	3	8	146	16.5	4.69
G3H8C9	Semaphorin-3B OS=Cricetulus griseus GN=I79_006629 PE=4 SV=1 - [G3H8C9_CRIGR]	141.96	0.0147	1	1	1	8	749	83	8.38
G3GU92	Lupus La protein-like OS=Cricetulus griseus GN=I79_001246 PE=4 SV=1 - [G3GU92_CRIGR]	244.71	0.1204	2	4	4	8	407	46.8	9.69
G3HV50	Prefoldin subunit 5 OS=Cricetulus griseus GN=I79_014827 PE=3 SV=1 - [G3HV50_CRIGR]	195.96	0.3831	2	4	4	8	154	17.3	6.33
Q32P66	UPF0587 protein C1orf123 homolog OS=Bos taurus PE=2 SV=1 - [CA123_BOVIN]	36.1	0.1	2	2	2	8	160	18.1	5.02
G3I1K4	Beta-1,4-galactosyltransferase 4 OS=Cricetulus griseus GN=I79_017266 PE=4 SV=1 - [G3I1K4_CRIGR]	134.33	0.0233	1	1	1	8	344	39.9	8.7
G3I783	Heterogeneous nuclear ribonucleoprotein D-like OS=Cricetulus griseus GN=I79_019368 PE=4 SV=1 - [G3I783_CRIGR]	163.58	0.0959	2	1	3	8	271	30.2	8.72
G3HJU9	40S ribosomal protein S29 OS=Cricetulus griseus GN=I79_010951 PE=4 SV=1 - [G3HJU9_CRIGR]	156.98	0.1429	4	1	1	8	56	6.8	10.1
G3I8W2	Beta-1,4-galactosyltransferase 1 OS=Cricetulus griseus GN=I79_019994 PE=4 SV=1 - [G3I8W2_CRIGR]	99.31	0.031	4	1	1	8	258	30.1	8.92
G3HM03	Synaptic vesicle membrane protein VAT-1-like OS=Cricetulus griseus GN=I79_011747 PE=4 SV=1 - [G3HM03_CRIGR]	297.14	0.0965	1	2	2	8	259	28.5	7.59
Q3T0V3	Eukaryotic translation initiation factor 3 subunit K OS=Bos taurus GN=EIF3K PE=2 SV=1 - [EIF3K_BOVIN]	155.61	0.0321	1	1	1	8	218	25.1	4.93
G3H928	Adenylate kinase 2, mitochondrial OS=Cricetulus griseus GN=I79_006890 PE=3 SV=1 - [G3H928_CRIGR]	119.14	0.1549	3	2	2	8	142	15.4	7.85
G3H705	Cystatin-C OS=Cricetulus griseus GN=I79_006129 PE=4 SV=1 - [G3H705_CRIGR]	339.19	0.2059	1	2	2	8	102	11.1	9.41
G3HN65	Ras suppressor protein 1 OS=Cricetulus griseus GN=I79_012198 PE=4 SV=1 - [G3HN65_CRIGR]	127.99	0.0325	2	1	1	8	277	31.5	8.63
G3HT06	L-lactate dehydrogenase A chain OS=Cricetulus griseus GN=I79_014006 PE=3 SV=1 - [G3HT06_CRIGR]	286.77	0.1548	1	1	2	8	84	9.2	5.06
G3GZD2	Phosphoglucomutase-1 OS=Cricetulus griseus GN=I79_003195 PE=3 SV=1 - [G3GZD2_CRIGR]	229.79	0.0437	1	2	2	8	572	62.8	5.86
G3HTF7	Myosin-Ic OS=Cricetulus griseus GN=I79_014182 PE=4 SV=1 - [G3HTF7_CRIGR]	163.73	0.0821	1	1	4	8	487	55.6	6.81
G3I539	Hsc70-interacting protein OS=Cricetulus griseus GN=I79_018582 PE=4 SV=1 - [G3I539_CRIGR]	147.06	0.3065	1	3	3	8	124	13.9	6.77
G3H9J8	Exportin-T OS=Cricetulus griseus GN=I79_007072 PE=4 SV=1 - [G3H9J8_CRIGR]	158.64	0.0353	1	3	3	8	962	109.8	5.29
G3HA86	Exostosin-1 OS=Cricetulus griseus GN=I79_007332 PE=4 SV=1 - [G3HA86_CRIGR]	171.35	0.0258	2	1	1	8	388	44.8	8.79
G3HUU7	Protein S100-A10 OS=Cricetulus griseus GN=I79_014715 PE=4 SV=1 - [G3HUU7_CRIGR]	82.07	0.2784	1	2	2	8	97	11.2	6.77
G3HNJ6	60S ribosomal protein L5 OS=Cricetulus griseus GN=I79_012334 PE=3 SV=1 - [G3HNJ6_CRIGR]	136.2	0.138	6	3	3	8	297	34.4	9.74
A6QLI0	Mammalian ependymin-related protein 1 OS=Bos taurus GN=EPDR1 PE=2 SV=1 - [EPDR1_BOVIN]	250.83	0.1356	2	3	3	8	236	26.5	7.8
G3IIE3	Serpin B8 OS=Cricetulus griseus GN=I79_023611 PE=3 SV=1 - [G3IIE3_CRIGR]	196.83	0.1096	1	3	3	8	374	42.5	6.37
G3HQK5	UDP-N-acetylhexosamine pyrophosphorylase OS=Cricetulus griseus GN=I79_013109 PE=4 SV=1 - [G3HQK5_CRIGR]	118.83	0.069	1	3	3	8	522	58.7	6.49
G3HE31	26S protease regulatory subunit 7 OS=Cricetulus griseus GN=I79_008802 PE=3 SV=1 - [G3HE31_CRIGR]	211.61	0.1146	2	3	3	8	410	46	6.6
G3IKQ9	Osteopontin OS=Cricetulus griseus GN=I79_024462 PE=4 SV=1 - [G3IKQ9_CRIGR]	234.47	0.3248	1	2	2	8	117	13.2	5.66
G3IEK4	Angio-associated migratory cell protein OS=Cricetulus griseus GN=I79_022151 PE=4 SV=1 - [G3IEK4_CRIGR]	154.04	0.0334	2	1	1	8	389	42.1	4.6
Q3HR12	Guanine nucleotide binding protein alpha inhibiting 3 OS=Cricetulus griseus GN=GNAI3 PE=2 SV=1 - [Q3HR12_CRIGR]	280.21	0.1497	7	2	4	8	354	40.5	5.69
G3GT56	Trifunctional purine biosynthetic protein adenosine-3 OS=Cricetulus griseus GN=I79_000830 PE=3 SV=1 - [G3GT56_CRIGR]	229.64	0.0446	2	3	3	8	1010	107.5	6.81
G3HV92	H/ACA ribonucleoprotein complex subunit 4 OS=Cricetulus griseus GN=I79_014871 PE=4 SV=1 - [G3HV92_CRIGR]	385.84	0.0351	1	1	1	8	513	57.8	9.41
G3I5W9	DNA-binding protein A OS=Cricetulus griseus GN=I79_018880 PE=4 SV=1 - [G3I5W9_CRIGR]	274.09	0.1845	1	1	1	8	103	11.4	10.55
G3GY88	Phospholipid scramblase 3 OS=Cricetulus griseus GN=I79_002761 PE=4 SV=1 - [G3GY88_CRIGR]	437.88	0.0644	1	1	1	8	295	31.7	6.65
Q5E988	40S ribosomal protein S5 OS=Bos taurus GN=RPS5 PE=2 SV=3 - [RS5_BOVIN]	368.47	0.0735	1	1	1	7	204	22.9	9.72
Q3SZR8	Serine/arginine-rich splicing factor 3 OS=Bos taurus GN=SRSF3 PE=2 SV=1 - [SRSF3_BOVIN]	86.54	0.0549	1	1	1	7	164	19.3	11.65
G3IN18	60S ribosomal protein L8 OS=Cricetulus griseus GN=I79_025329 PE=3 SV=1 - [G3IN18_CRIGR]	76.73	0.1051	2	2	2	7	257	28	11.03
G3IBF7	Ubiquitin-conjugating enzyme E2 K OS=Cricetulus griseus GN=I79_020977 PE=3 SV=1 - [G3IBF7_CRIGR]	198.04	0.135	1	2	2	7	200	22.4	5.44
P61284	60S ribosomal protein L12 OS=Bos taurus GN=RPL12 PE=2 SV=1 - [RL12_BOVIN]	350.92	0.1879	1	1	2	7	165	17.8	9.42
O97680	Thioredoxin OS=Bos taurus GN=TXN PE=3 SV=3 - [THIO_BOVIN]	20.43	0.2	1	2	2	7	105	11.8	5.03
P18902	Retinol-binding protein 4 OS=Bos taurus GN=RBP4 PE=1 SV=1 - [RET4_BOVIN]	124.09	0.1093	1	2	2	7	183	21.1	5.68
P80209	Cathepsin D OS=Bos taurus GN=CTSD PE=1 SV=2 - [CATD_BOVIN]	102.47	0.0667	1	1	2	7	390	42.5	7.05
Q58CQ9	Pantetheinase OS=Bos taurus GN=VNN1 PE=2 SV=1 - [VNN1_BOVIN]	122.3	0.0471	1	2	2	7	510	56.9	5.57
P01250	Thymopoietin-2 OS=Bos taurus PE=1 SV=1 - [THP2_BOVIN]	243.75	0.5714	3	2	2	7	49	5.6	5.26
Q3ZC42	Alcohol dehydrogenase class-3 OS=Bos taurus GN=ADH5 PE=2 SV=1 - [ADHX_BOVIN]	26.7	0.0428	1	2	2	7	374	39.7	7.5
Q3T148	Eukaryotic translation initiation factor 3 subunit M OS=Bos taurus GN=EIF3M PE=2 SV=2 - [EIF3M_BOVIN]	118.37	0.1153	2	3	3	7	373	42.4	5.63
Q5E963	Actin-related protein 2/3 complex subunit 5-like protein OS=Bos taurus GN=ARPC5L PE=2 SV=1 - [ARP5L_BOVIN]	148.8	0.0784	1	1	1	7	153	16.9	6.6
Q3T171	60S ribosomal protein L36 OS=Bos taurus GN=RPL36 PE=3 SV=3 - [RL36_BOVIN]	41.92	0.0952	1	1	1	7	105	12.2	11.59
A2VE52	Oligoribonuclease, mitochondrial OS=Bos taurus GN=REXO2 PE=2 SV=1 - [ORN_BOVIN]	96.67	0.0422	2	1	1	7	237	26.9	7.46
P46196	Mitogen-activated protein kinase 1 OS=Bos taurus GN=MAPK1 PE=2 SV=3 - [MK01_BOVIN]	35.64	0.1389	13	5	5	7	360	41.3	6.98
G3H283	Putative uncharacterized protein OS=Cricetulus griseus GN=I79_004254 PE=4 SV=1 - [G3H283_CRIGR]	127.48	0.0484	1	4	4	7	972	111.8	6.64
G3HW34	Prolow-density lipoprotein receptor-related protein 1 OS=Cricetulus griseus GN=I79_015182 PE=4 SV=1 - [G3HW34_CRIGR]	175.12	0.0189	1	3	3	7	2217	245.8	5.31
G3H577	Ganglioside GM2 activator OS=Cricetulus griseus GN=I79_005452 PE=4 SV=1 - [G3H577_CRIGR]	32.43	0.1309	4	2	2	7	191	20.8	6.73
G3GXB5	Ethanolamine-phosphate cytidylyltransferase OS=Cricetulus griseus GN=I79_002405 PE=4 SV=1 - [G3GXB5_CRIGR]	77.74	0.0819	2	2	2	7	354	40.1	6.71
G3HMV2	60S ribosomal protein L11 OS=Cricetulus griseus GN=I79_012069 PE=3 SV=1 - [G3HMV2_CRIGR]	203.48	0.2079	3	3	3	7	178	20.3	9.6
G3HFF0	Solute carrier family 2, facilitated glucose transporter member 1 (Fragment) OS=Cricetulus griseus GN=I79_009336 PE=3 SV=1 - [G3HFF0_CRIGR]	123.69	0.1214	4	5	5	7	486	53.3	8.73
G3HG23	Laminin subunit gamma-2 OS=Cricetulus griseus GN=I79_009542 PE=4 SV=1 - [G3HG23_CRIGR]	126.6	0.1584	1	3	3	7	221	24.4	4.75
G3IPB5	Pre-mRNA-processing-splicing factor 8 OS=Cricetulus griseus GN=I79_025821 PE=4 SV=1 - [G3IPB5_CRIGR]	57.85	0.0568	1	2	2	7	264	30.1	7.24
G3IKV6	UDP-GlcNAc:betaGal beta-1,3-N-acetylglucosaminyltransferase 7 OS=Cricetulus griseus GN=I79_024510 PE=4 SV=1 - [G3IKV6_CRIGR]	62.3	0.1029	1	3	3	7	408	46.6	8.6
G3H3E4	Galectin-3-binding protein OS=Cricetulus griseus GN=I79_004759 PE=4 SV=1 - [G3H3E4_CRIGR]	113.73	0.0645	1	3	3	7	574	63.8	5.19
G3HTF8	Proto-oncogene C-crk OS=Cricetulus griseus GN=I79_014183 PE=4 SV=1 - [G3HTF8_CRIGR]	139.68	0.0734	1	2	2	7	327	36.1	5.73
G3HCL8	Cdc42-interacting protein 4 OS=Cricetulus griseus GN=I79_008229 PE=4 SV=1 - [G3HCL8_CRIGR]	29.58	0.0738	1	3	3	7	610	69.1	5.81
G3HQZ8	Cytoplasmic aconitate hydratase OS=Cricetulus griseus GN=I79_013257 PE=4 SV=1 - [G3HQZ8_CRIGR]	153.77	0.0099	1	1	1	7	808	88.9	6.84
G3H3E3	Soluble calcium-activated nucleotidase 1 OS=Cricetulus griseus GN=I79_004758 PE=4 SV=1 - [G3H3E3_CRIGR]	66.22	0.1225	1	4	4	7	400	45.2	6.64
G3HXA2	Basic leucine zipper and W2 domain-containing protein 2 OS=Cricetulus griseus GN=I79_015621 PE=4 SV=1 - [G3HXA2_CRIGR]	92.58	0.085	2	3	3	7	412	47.1	5.71
Q3T0I2	Pro-cathepsin H OS=Bos taurus GN=CTSH PE=2 SV=1 - [CATH_BOVIN]	65.39	0.0209	2	1	1	7	335	37.3	7.96
G3HMY0	Hydroxymethylglutaryl-CoA synthase, cytoplasmic OS=Cricetulus griseus GN=I79_012110 PE=4 SV=1 - [G3HMY0_CRIGR]	108.02	0.0615	1	3	3	7	520	57.3	5.66
G3IGT5	Sjoegren syndrome/scleroderma autoantigen 1 OS=Cricetulus griseus GN=I79_023011 PE=4 SV=1 - [G3IGT5_CRIGR]	165.77	0.1256	1	2	2	7	199	21.4	5.24
G3H7F8	Acidic leucine-rich nuclear phosphoprotein 32 family member B (Fragment) OS=Cricetulus griseus GN=I79_006289 PE=4 SV=1 - [G3H7F8_CRIGR]	208.74	0.1127	1	1	2	7	213	24.2	3.81
G3IJU1	MAM domain-containing protein 2 OS=Cricetulus griseus GN=I79_024128 PE=4 SV=1 - [G3IJU1_CRIGR]	123.96	0.1018	1	2	2	7	226	25.2	4.65
G3GUP7	Ubiquitin carboxyl-terminal hydrolase OS=Cricetulus griseus GN=I79_001414 PE=3 SV=1 - [G3GUP7_CRIGR]	25.73	0.0587	1	4	4	7	835	93.3	5.06
G3I8T3	Wiskott-Aldrich syndrome protein family member 2 OS=Cricetulus griseus GN=I79_019962 PE=4 SV=1 - [G3I8T3_CRIGR]	101.23	0.1	3	3	3	7	360	39.5	8.56
G3HJD9	Transcription elongation factor SPT5 OS=Cricetulus griseus GN=I79_010783 PE=4 SV=1 - [G3HJD9_CRIGR]	27.21	0.0614	1	4	4	7	944	104.2	7.06
G3H1B3	Lamin-L(I) OS=Cricetulus griseus GN=I79_003938 PE=3 SV=1 - [G3H1B3_CRIGR]	140.03	0.0994	1	3	3	7	483	54.9	4.94
G3H4Q7	Ras-related protein Rab-21 OS=Cricetulus griseus GN=I79_005264 PE=4 SV=1 - [G3H4Q7_CRIGR]	170.01	0.0885	2	1	1	7	113	12.1	6.3
G3GRT8	Diphosphomevalonate decarboxylase OS=Cricetulus griseus GN=I79_000232 PE=4 SV=1 - [G3GRT8_CRIGR]	176.5	0.0923	1	3	3	7	401	43.8	6.39
G3IFE7	Phosphoglucomutase-2 OS=Cricetulus griseus GN=I79_022469 PE=4 SV=1 - [G3IFE7_CRIGR]	40.28	0.0484	1	3	3	7	620	69	6.34
G3HEZ0	Stress-70 protein, mitochondrial OS=Cricetulus griseus GN=I79_009139 PE=3 SV=1 - [G3HEZ0_CRIGR]	182.58	0.0612	2	3	3	7	605	65.8	6.1
G3I3H2	60S acidic ribosomal protein P2 OS=Cricetulus griseus GN=I79_017979 PE=3 SV=1 - [G3I3H2_CRIGR]	236.45	0.4174	3	2	3	7	115	11.7	4.54
G3HJ13	LIM and senescent cell antigen-like-containing domain protein 1 OS=Cricetulus griseus GN=I79_010647 PE=4 SV=1 - [G3HJ13_CRIGR]	249.01	0.0369	1	1	1	7	325	37.2	8.05
O02659	Mannose-binding protein C OS=Bos taurus GN=MBL PE=2 SV=1 - [MBL2_BOVIN]	57.94	0.0884	1	2	2	7	249	26.5	5.2
P35604	Coatomer subunit zeta-1 OS=Bos taurus GN=COPZ1 PE=1 SV=2 - [COPZ1_BOVIN]	84.84	0.0565	2	1	1	7	177	20.2	4.81
G3I620	Aspartyl aminopeptidase OS=Cricetulus griseus GN=I79_018931 PE=3 SV=1 - [G3I620_CRIGR]	122.45	0.172	2	5	5	7	471	51.9	7.12
G3HSM3	Thimet oligopeptidase OS=Cricetulus griseus GN=I79_013857 PE=3 SV=1 - [G3HSM3_CRIGR]	175.85	0.0611	2	4	4	7	687	78.1	5.99
G3H9U3	Splicing factor, proline-and glutamine-rich OS=Cricetulus griseus GN=I79_007174 PE=4 SV=1 - [G3H9U3_CRIGR]	147.57	0.1652	1	3	3	7	351	40.2	6.74
G3HU10	Prefoldin subunit 2 OS=Cricetulus griseus GN=I79_014378 PE=4 SV=1 - [G3HU10_CRIGR]	395.13	0.0504	1	1	1	7	238	25.7	9.16
G3IA91	Protein NDRG1 OS=Cricetulus griseus GN=I79_020508 PE=4 SV=1 - [G3IA91_CRIGR]	207.27	0.057	3	1	1	7	263	28.9	5.53
Q765N9	Claudin-3 OS=Bos taurus GN=CLDN3 PE=2 SV=1 - [CLD3_BOVIN]	91.96	0.1324	4	2	3	7	219	23.4	7.77
G3HG54	Kin of IRRE-like protein 1 OS=Cricetulus griseus GN=I79_009573 PE=4 SV=1 - [G3HG54_CRIGR]	269.15	0.057	1	3	3	7	789	87	5.97
G3I519	Latexin OS=Cricetulus griseus GN=I79_018559 PE=4 SV=1 - [G3I519_CRIGR]	140.74	0.1622	1	2	2	7	222	25.4	6.09
G3IJV7	Cytosolic acyl coenzyme A thioester hydrolase OS=Cricetulus griseus GN=I79_024146 PE=4 SV=1 - [G3IJV7_CRIGR]	76.14	0.0935	1	2	2	7	321	35.6	7.53
G3H310	Arylsulfatase B OS=Cricetulus griseus GN=I79_004616 PE=4 SV=1 - [G3H310_CRIGR]	47.39	0.3111	1	2	2	7	90	10.6	6.24
G3IBH0	Metalloproteinase inhibitor 1 OS=Cricetulus griseus GN=I79_020990 PE=4 SV=1 - [G3IBH0_CRIGR]	61.55	0.1724	1	3	3	7	203	22.4	8.47
G3H4S3	Heat shock 70 kDa protein 13 OS=Cricetulus griseus GN=I79_005283 PE=3 SV=1 - [G3H4S3_CRIGR]	54.09	0.0591	1	1	2	7	389	42.5	6.11
G3ID93	WD repeat-containing protein 5 OS=Cricetulus griseus GN=I79_021666 PE=4 SV=1 - [G3ID93_CRIGR]	207.78	0.0808	2	2	2	6	334	36.6	8.27
G3H5W4	60S ribosomal protein L23 OS=Cricetulus griseus GN=I79_005709 PE=3 SV=1 - [G3H5W4_CRIGR]	55.42	0.2	2	2	2	6	140	14.9	10.51
Q3T0F7	Myotrophin OS=Bos taurus GN=MTPN PE=1 SV=3 - [MTPN_BOVIN]	74.82	0.4153	1	2	2	6	118	12.9	5.52
G3HP80	Vesicle-trafficking protein SEC22b OS=Cricetulus griseus GN=I79_012586 PE=4 SV=1 - [G3HP80_CRIGR]	104.22	0.0837	1	2	2	6	215	24.7	8.51
G3H6X4	Splicing factor 3B subunit 5 OS=Cricetulus griseus GN=I79_006094 PE=4 SV=1 - [G3H6X4_CRIGR]	218.3	0.1744	1	1	1	6	86	10.1	6.35
P52556	Flavin reductase (NADPH) OS=Bos taurus GN=BLVRB PE=1 SV=2 - [BLVRB_BOVIN]	100.11	0.0485	1	1	1	6	206	22.1	7.11
Q0V8B6	Tripeptidyl-peptidase 1 OS=Bos taurus GN=TPP1 PE=2 SV=1 - [TPP1_BOVIN]	56.32	0.0142	1	1	1	6	563	61.3	6.77
Q58DW0	60S ribosomal protein L4 OS=Bos taurus GN=RPL4 PE=2 SV=3 - [RL4_BOVIN]	134.89	0.0711	2	2	2	6	422	47.4	10.96
Q32PA4	14 kDa phosphohistidine phosphatase OS=Bos taurus GN=PHPT1 PE=2 SV=1 - [PHP14_BOVIN]	264.45	0.12	1	1	1	6	125	13.9	5.82
Q3MHN0	Proteasome subunit beta type-6 OS=Bos taurus GN=PSMB6 PE=1 SV=1 - [PSB6_BOVIN]	67.17	0.205	1	2	2	6	239	25.5	5.02
Q3SYU7	Transportin-1 OS=Bos taurus GN=TNPO1 PE=1 SV=2 - [TNPO1_BOVIN]	276.19	0.0434	2	2	2	6	898	102.3	4.98
P12378	UDP-glucose 6-dehydrogenase OS=Bos taurus GN=UGDH PE=1 SV=2 - [UGDH_BOVIN]	33.03	0.0405	1	2	2	6	494	55.1	7.58
A6H742	Plastin-1 OS=Bos taurus GN=PLS1 PE=2 SV=1 - [PLSI_BOVIN]	77.52	0.0413	1	1	2	6	630	70.5	5.17
Q08E38	Pre-mRNA-processing factor 19 OS=Bos taurus GN=PRPF19 PE=2 SV=1 - [PRP19_BOVIN]	123.43	0.1032	1	1	3	6	504	55.2	6.61
A6H7I5	Dynamin-2 OS=Bos taurus GN=DNM2 PE=2 SV=1 - [DYN2_BOVIN]	38.56	0.0381	5	4	4	6	866	97.8	7.62
G3HC47	Glucosylceramidase OS=Cricetulus griseus GN=I79_007997 PE=4 SV=1 - [G3HC47_CRIGR]	222.04	0.0408	2	2	2	6	515	57.4	8.13
G3HF46	Polypyrimidine tract-binding protein 1 OS=Cricetulus griseus GN=I79_009199 PE=4 SV=1 - [G3HF46_CRIGR]	145.19	0.0909	2	3	3	6	528	56.7	9.38
G3GX18	Unhealthy ribosome biogenesis protein 2-like OS=Cricetulus griseus GN=I79_002305 PE=4 SV=1 - [G3GX18_CRIGR]	64.69	0.0092	3	1	2	6	1522	171.8	7.25
G3HNV7	Glyceraldehyde-3-phosphate dehydrogenase OS=Cricetulus griseus GN=I79_012452 PE=3 SV=1 - [G3HNV7_CRIGR]	148.24	0.1667	8	2	3	6	294	31.8	7.15
G3H2V3	Acidic leucine-rich nuclear phosphoprotein 32 family member E OS=Cricetulus griseus GN=I79_004556 PE=4 SV=1 - [G3H2V3_CRIGR]	213.65	0.0558	1	1	1	6	215	24.1	3.89
G3HZW3	60S ribosomal protein L18 OS=Cricetulus griseus GN=I79_016627 PE=4 SV=1 - [G3HZW3_CRIGR]	187.51	0.1912	2	2	2	6	136	15.2	11.81
G3HRT6	Solute carrier family 12 member 1 OS=Cricetulus griseus GN=I79_013558 PE=4 SV=1 - [G3HRT6_CRIGR]	115.28	0.0118	1	1	1	6	1191	130.6	7.17
G3HMR9	Proto-oncogene tyrosine-protein kinase Fyn OS=Cricetulus griseus GN=I79_012041 PE=4 SV=1 - [G3HMR9_CRIGR]	84.72	0.1121	31	2	3	6	232	26.6	5.36
G3I581	Prefoldin subunit 1 OS=Cricetulus griseus GN=I79_018625 PE=4 SV=1 - [G3I581_CRIGR]	27.04	0.0986	2	1	1	6	71	8.5	6.09
G3IMK2	Tight junction protein ZO-2 OS=Cricetulus griseus GN=I79_025142 PE=4 SV=1 - [G3IMK2_CRIGR]	108.96	0.0647	2	3	3	6	464	53	6.7
G3GTY5	60S ribosomal protein L23a OS=Cricetulus griseus GN=I79_001127 PE=4 SV=1 - [G3GTY5_CRIGR]	79.15	0.3134	15	2	2	6	67	7.6	8.43
G3GWM0	Eukaryotic peptide chain release factor GTP-binding subunit ERF3B OS=Cricetulus griseus GN=I79_002147 PE=4 SV=1 - [G3GWM0_CRIGR]	37.73	0.0599	1	3	3	6	584	65.3	6.3
G3H5C9	40S ribosomal protein S27 OS=Cricetulus griseus GN=I79_005510 PE=3 SV=1 - [G3H5C9_CRIGR]	111.1	0.25	6	2	2	6	84	9.6	9.6
G3GVY7	Nardilysin OS=Cricetulus griseus GN=I79_001893 PE=3 SV=1 - [G3GVY7_CRIGR]	86.83	0.0345	1	3	3	6	869	98.4	5.08
Q58CU2	Band 4.1-like protein 5 OS=Bos taurus GN=EPB41L5 PE=2 SV=1 - [E41L5_BOVIN]	86.77	0.0438	2	2	2	6	502	57.1	9.35
G3HP03	RNA-binding protein EWS OS=Cricetulus griseus GN=I79_012504 PE=4 SV=1 - [G3HP03_CRIGR]	175.04	0.0442	1	2	2	6	656	68.5	9.33
G3HIT7	Microtubule-associated protein 1B OS=Cricetulus griseus GN=I79_010564 PE=4 SV=1 - [G3HIT7_CRIGR]	125.55	0.0333	2	5	5	6	2371	260.2	4.79
G3H319	Tubulin-specific chaperone A OS=Cricetulus griseus GN=I79_004625 PE=4 SV=1 - [G3H319_CRIGR]	102.35	0.3571	2	3	3	6	84	9.9	4.65
G3H604	Alpha-galactosidase A OS=Cricetulus griseus GN=I79_005753 PE=4 SV=1 - [G3H604_CRIGR]	64.05	0.0792	1	2	2	6	341	38.5	5.05
G3HY23	Small nuclear ribonucleoprotein Sm D3 OS=Cricetulus griseus GN=I79_015922 PE=4 SV=1 - [G3HY23_CRIGR]	196.48	0.2262	1	2	2	6	84	9.3	11.94
G3I1R2	Purine nucleoside phosphorylase (Fragment) OS=Cricetulus griseus GN=I79_017328 PE=4 SV=1 - [G3I1R2_CRIGR]	285.21	0.1025	2	2	2	6	283	31.4	6.73
G3HRL6	CD63 antigen OS=Cricetulus griseus GN=I79_013522 PE=4 SV=1 - [G3HRL6_CRIGR]	157.02	0.0431	1	1	1	6	232	25.5	7.61
G3H2I6	Neural cell adhesion molecule 1 OS=Cricetulus griseus GN=I79_004399 PE=4 SV=1 - [G3H2I6_CRIGR]	149.75	0.0308	2	3	3	6	1071	114.2	4.83
G3HID3	Coatomer subunit gamma OS=Cricetulus griseus GN=I79_010394 PE=3 SV=1 - [G3HID3_CRIGR]	58.8	0.0652	2	4	4	6	874	97.5	5.39
G3HU05	Intelectin-1a OS=Cricetulus griseus GN=I79_014372 PE=4 SV=1 - [G3HU05_CRIGR]	198.01	0.0176	1	1	1	6	626	68.5	6.15
G3HKV9	Group XV phospholipase A2 OS=Cricetulus griseus GN=I79_011341 PE=4 SV=1 - [G3HKV9_CRIGR]	45.24	0.0704	1	2	2	6	412	47.2	6.52
G3HLT7	WAP four-disulfide core domain protein 2 OS=Cricetulus griseus GN=I79_011680 PE=4 SV=1 - [G3HLT7_CRIGR]	195.61	0.0688	1	1	1	6	160	16.8	5.94
G3I7I0	DCN1-like protein OS=Cricetulus griseus GN=I79_019470 PE=4 SV=1 - [G3I7I0_CRIGR]	20.84	0.0629	2	1	1	6	159	18.3	5.02
G3IEB1	Annexin OS=Cricetulus griseus GN=I79_022056 PE=3 SV=1 - [G3IEB1_CRIGR]	69.54	0.0313	1	1	1	6	319	35.9	5.64
G3I306	Eukaryotic translation initiation factor 4 gamma 1 OS=Cricetulus griseus GN=I79_017805 PE=4 SV=1 - [G3I306_CRIGR]	166.13	0.0252	2	3	3	6	1590	175	5.35
G3I3B7	Ribonucleoside-diphosphate reductase OS=Cricetulus griseus GN=I79_017921 PE=3 SV=1 - [G3I3B7_CRIGR]	107.63	0.0328	1	2	2	6	792	90.2	6.83
G3H3V7	Prefoldin subunit 3 OS=Cricetulus griseus GN=I79_004947 PE=4 SV=1 - [G3H3V7_CRIGR]	119.94	0.0935	3	1	1	6	107	12.4	5.63
G3HIQ3	Activated RNA polymerase II transcriptional coactivator p15 OS=Cricetulus griseus GN=I79_010528 PE=4 SV=1 - [G3HIQ3_CRIGR]	163.58	0.1864	2	1	1	6	59	7	6.71
Q5E9P9	Serine hydroxymethyltransferase, cytosolic OS=Bos taurus GN=SHMT1 PE=2 SV=3 - [GLYC_BOVIN]	279.96	0.1012	1	3	4	6	484	52.9	8.03
G3HSE5	Coatomer subunit beta OS=Cricetulus griseus GN=I79_013776 PE=3 SV=1 - [G3HSE5_CRIGR]	202.38	0.0506	2	3	3	6	870	98.2	5.71
G3IMK5	Claudin OS=Cricetulus griseus GN=I79_025145 PE=3 SV=1 - [G3IMK5_CRIGR]	143.03	0.1333	4	1	2	6	210	22.1	8.24
G3HBB1	Heterogeneous nuclear ribonucleoprotein F OS=Cricetulus griseus GN=I79_007736 PE=4 SV=1 - [G3HBB1_CRIGR]	75.32	0.194	2	1	1	6	67	7.6	6.51
G3IJJ0	NHP2-like protein 1 OS=Cricetulus griseus GN=I79_024025 PE=4 SV=1 - [G3IJJ0_CRIGR]	165.72	0.1644	2	1	1	6	73	8	7.85
G3ILI6	26S proteasome non-ATPase regulatory subunit 3 OS=Cricetulus griseus GN=I79_024752 PE=4 SV=1 - [G3ILI6_CRIGR]	165.71	0.2269	1	1	2	6	119	13.9	9.5
G3I5H3	Elongation factor 1-delta OS=Cricetulus griseus GN=I79_018721 PE=3 SV=1 - [G3I5H3_CRIGR]	186.4	0.1355	1	3	3	6	332	36.6	5.62
G3IMX6	PEST proteolytic signal-containing nuclear protein OS=Cricetulus griseus GN=I79_025281 PE=4 SV=1 - [G3IMX6_CRIGR]	23.58	0.0938	3	1	1	6	160	17.1	6.96
G3IGT4	Latent-transforming growth factor beta-binding protein 3 OS=Cricetulus griseus GN=I79_023010 PE=4 SV=1 - [G3IGT4_CRIGR]	146.21	0.0593	1	2	2	6	624	68.1	5.07
G3I3H9	Chitinase domain-containing protein 1 OS=Cricetulus griseus GN=I79_017987 PE=3 SV=1 - [G3I3H9_CRIGR]	211.31	0.0789	1	2	2	6	393	44.9	7.97
G3GZZ3	Sodium-dependent phosphate transporter 1 OS=Cricetulus griseus GN=I79_003441 PE=4 SV=1 - [G3GZZ3_CRIGR]	29.41	0.0355	1	1	1	6	423	46.7	6.47
G3I018	26S proteasome non-ATPase regulatory subunit 7 OS=Cricetulus griseus GN=I79_016691 PE=4 SV=1 - [G3I018_CRIGR]	131.02	0.1688	2	3	3	6	320	36.5	6.77
G3IC54	60S ribosomal protein L10 OS=Cricetulus griseus GN=I79_021242 PE=4 SV=1 - [G3IC54_CRIGR]	251.07	0.1104	1	1	1	6	163	18.6	9.95
Q17QC5	AP-2 complex subunit sigma OS=Bos taurus GN=AP2S1 PE=2 SV=1 - [AP2S1_BOVIN]	39.43	0.0493	2	1	1	5	142	17	6.18
G3HDD4	NEDD8 OS=Cricetulus griseus GN=I79_008538 PE=4 SV=1 - [G3HDD4_CRIGR]	32.04	0.1728	2	1	1	5	81	9	7.25
P35445	Cartilage oligomeric matrix protein OS=Bos taurus GN=COMP PE=1 SV=2 - [COMP_BOVIN]	129.95	0.0317	1	1	1	5	756	82.3	4.61
Q3T0T5	Hematological and neurological expressed 1 protein OS=Bos taurus GN=HN1 PE=2 SV=3 - [HN1_BOVIN]	130.48	0.1169	2	1	1	5	154	16	5.6
P26884	Peptidyl-prolyl cis-trans isomerase FKBP3 OS=Bos taurus GN=FKBP3 PE=1 SV=2 - [FKBP3_BOVIN]	62.32	0.1027	2	2	2	5	224	25.2	9.28
G3GVX1	Ribosome-binding protein 1 OS=Cricetulus griseus GN=I79_001876 PE=4 SV=1 - [G3GVX1_CRIGR]	49.92	0.0214	1	3	3	5	2009	216.6	8.57
G3H953	KH domain-containing, RNA-binding, signal transduction-associated protein 1 OS=Cricetulus griseus GN=I79_006915 PE=4 SV=1 - [G3H953_CRIGR]	23.57	0.0632	2	2	2	5	443	48.3	8.66
G3IBL0	Protein FAM50A OS=Cricetulus griseus GN=I79_021036 PE=4 SV=1 - [G3IBL0_CRIGR]	39.32	0.0502	4	1	2	5	299	35.5	6.25
G3HT32	Cullin-2 OS=Cricetulus griseus GN=I79_014042 PE=3 SV=1 - [G3HT32_CRIGR]	96.09	0.0134	1	1	1	5	745	86.9	6.93
Q28161	Plakophilin-1 OS=Bos taurus GN=PKP1 PE=2 SV=1 - [PKP1_BOVIN]	263.17	0.0206	1	1	1	5	727	80.1	8.95
G3HPM5	Methyltransferase-like protein 11B OS=Cricetulus griseus GN=I79_012740 PE=4 SV=1 - [G3HPM5_CRIGR]	53.6	0.0212	1	1	1	5	283	32.3	6.24
G3HKL1	Acid sphingomyelinase-like phosphodiesterase 3a (Fragment) OS=Cricetulus griseus GN=I79_011240 PE=4 SV=1 - [G3HKL1_CRIGR]	106.47	0.0361	1	2	2	5	416	47.2	6.3
G3GTB3	5-formyltetrahydrofolate cyclo-ligase OS=Cricetulus griseus GN=I79_000890 PE=4 SV=1 - [G3GTB3_CRIGR]	41.46	0.0296	1	1	1	5	203	23.2	7.09
G3H4V0	Vigilin OS=Cricetulus griseus GN=I79_005313 PE=4 SV=1 - [G3H4V0_CRIGR]	237.21	0.0118	1	1	1	5	1268	141.6	6.87
G3HGE2	Protein TANC2 (Fragment) OS=Cricetulus griseus GN=I79_009666 PE=4 SV=1 - [G3HGE2_CRIGR]	119.78	0.0041	1	1	1	5	1971	217.5	7.62
G3I5Z1	Arrestin domain-containing protein 1 OS=Cricetulus griseus GN=I79_018902 PE=4 SV=1 - [G3I5Z1_CRIGR]	44.99	0.0392	1	2	2	5	459	48.8	7.64
G3HRK1	Receptor tyrosine-protein kinase erbB-3 OS=Cricetulus griseus GN=I79_013507 PE=4 SV=1 - [G3HRK1_CRIGR]	51.4	0.0221	3	2	3	5	1902	209.5	6.93
G3IFQ5	Protein XRP2 OS=Cricetulus griseus GN=I79_022578 PE=4 SV=1 - [G3IFQ5_CRIGR]	40.23	0.0229	1	1	1	5	349	39.4	5.52
G3HDV7	Leucine-rich repeat-containing protein 16A OS=Cricetulus griseus GN=I79_008723 PE=4 SV=1 - [G3HDV7_CRIGR]	55.61	0.0193	1	2	2	5	1449	160.2	8.05
G3H9Y7	NudC domain-containing protein 2 OS=Cricetulus griseus GN=I79_007220 PE=4 SV=1 - [G3H9Y7_CRIGR]	200.66	0.1847	1	2	2	5	157	17.7	5.07
Q5E9R3	EH domain-containing protein 1 OS=Bos taurus GN=EHD1 PE=1 SV=1 - [EHD1_BOVIN]	84.14	0.0562	2	3	3	5	534	60.6	6.83
G3IIT6	Cysteinyl-tRNA synthetase, cytoplasmic OS=Cricetulus griseus GN=I79_023763 PE=4 SV=1 - [G3IIT6_CRIGR]	164.16	0.0424	1	2	2	5	684	78.5	6.07
G3H3I2	Importin-9 OS=Cricetulus griseus GN=I79_004830 PE=4 SV=1 - [G3H3I2_CRIGR]	48.5	0.0492	1	3	3	5	1178	130.6	4.87
Q58D08	Pyrroline-5-carboxylate reductase 3 OS=Bos taurus GN=PYCRL PE=2 SV=1 - [P5CR3_BOVIN]	136.49	0.0357	1	1	1	5	308	32	7.24
G3H352	Cytoplasmic dynein 1 heavy chain 1 (Fragment) OS=Cricetulus griseus GN=I79_004663 PE=4 SV=1 - [G3H352_CRIGR]	187.96	0.005	1	2	2	5	4592	526.5	6.54
G3IJQ5	Pre-mRNA-processing-splicing factor 8 OS=Cricetulus griseus GN=I79_024091 PE=4 SV=1 - [G3IJQ5_CRIGR]	20.59	0.0274	1	1	1	5	365	42.1	8.78
G3HRR5	ELAV-like protein 1 OS=Cricetulus griseus GN=I79_013537 PE=4 SV=1 - [G3HRR5_CRIGR]	164.45	0.0716	1	2	2	5	335	37.1	9.19
G3HX42	Translation initiation factor eIF-2B subunit alpha OS=Cricetulus griseus GN=I79_015559 PE=3 SV=1 - [G3HX42_CRIGR]	124.27	0.0493	2	1	1	5	223	24.2	9.36
G3HPZ0	Vesicle-associated membrane protein 8 OS=Cricetulus griseus GN=I79_012876 PE=4 SV=1 - [G3HPZ0_CRIGR]	80.33	0.2574	2	2	2	5	101	11.4	8.19
G3I1H0	DNA replication licensing factor MCM3 OS=Cricetulus griseus GN=I79_017225 PE=3 SV=1 - [G3I1H0_CRIGR]	20.27	0.0136	2	1	1	5	807	90.7	5.48
G3HHE4	Leucyl-tRNA synthetase, cytoplasmic OS=Cricetulus griseus GN=I79_010044 PE=4 SV=1 - [G3HHE4_CRIGR]	58.74	0.0571	1	2	2	5	438	49.8	7.15
G3HV97	Ribose-phosphate pyrophosphokinase 1 OS=Cricetulus griseus GN=I79_014877 PE=4 SV=1 - [G3HV97_CRIGR]	81.15	0.151	3	2	2	5	192	21.1	6.62
G3GX38	Putative uncharacterized protein OS=Cricetulus griseus GN=I79_002350 PE=4 SV=1 - [G3GX38_CRIGR]	159.2	0.1236	1	1	1	5	89	10.5	8.19
G3H229	GMP synthase [glutamine-hydrolyzing] OS=Cricetulus griseus GN=I79_004230 PE=4 SV=1 - [G3H229_CRIGR]	71.44	0.0302	1	2	2	5	1159	129.9	6.16
G3I7W3	Dynactin subunit 1 OS=Cricetulus griseus GN=I79_019612 PE=4 SV=1 - [G3I7W3_CRIGR]	168.13	0.0215	1	1	1	5	559	63.9	4.97
G3HB39	Retinoic acid-induced protein 3 OS=Cricetulus griseus GN=I79_007654 PE=4 SV=1 - [G3HB39_CRIGR]	196.23	0.0367	1	1	1	5	354	39.7	6.54
G3HPZ2	S-adenosylmethionine synthase OS=Cricetulus griseus GN=I79_012879 PE=3 SV=1 - [G3HPZ2_CRIGR]	211.84	0.0452	1	1	1	5	332	36.9	8.12
G3HAN1	Charged multivesicular body protein 4b OS=Cricetulus griseus GN=I79_007487 PE=4 SV=1 - [G3HAN1_CRIGR]	206.62	0.0737	1	1	1	5	190	21.4	4.72
G3HP56	Glucosamine--fructose-6-phosphate aminotransferase [isomerizing] 2 OS=Cricetulus griseus GN=I79_012560 PE=4 SV=1 - [G3HP56_CRIGR]	100.8	0.1355	2	2	2	5	273	30.3	8.37
G3HJV0	Protein canopy-like 2 OS=Cricetulus griseus GN=I79_010952 PE=4 SV=1 - [G3HJV0_CRIGR]	139.11	0.1649	2	1	1	5	97	11	4.82
G3HD97	Thioredoxin domain-containing protein 5 OS=Cricetulus griseus GN=I79_008476 PE=3 SV=1 - [G3HD97_CRIGR]	217.16	0.0767	1	2	2	5	417	46.3	5.91
Q148L6	Trans-1,2-dihydrobenzene-1,2-diol dehydrogenase OS=Bos taurus GN=DHDH PE=2 SV=1 - [DHDH_BOVIN]	60.89	0.0478	2	1	1	5	335	36.6	7.3
G3I062	Putative uncharacterized protein OS=Cricetulus griseus GN=I79_016739 PE=4 SV=1 - [G3I062_CRIGR]	179.18	0.0678	1	1	1	5	236	26.8	10.92
G3IHN6	4F2 cell-surface antigen heavy chain OS=Cricetulus griseus GN=I79_023340 PE=4 SV=1 - [G3IHN6_CRIGR]	111.05	0.084	1	3	3	5	524	57.8	5.33
Q0III3	Cytoplasmic dynein 1 intermediate chain 2 OS=Bos taurus GN=DYNC1I2 PE=1 SV=1 - [DC1I2_BOVIN]	145.27	0.0343	1	1	1	5	612	68.3	5.33
G3H436	Inosine triphosphate pyrophosphatase OS=Cricetulus griseus GN=Itpa PE=3 SV=1 - [G3H436_CRIGR]	64.14	0.1378	1	2	2	5	196	21.6	7.24
A9Q1J7	Developmental pluripotency-associated protein 3 OS=Bos taurus GN=DPPA3 PE=2 SV=1 - [DPPA3_BOVIN]	0	0.0368	5	1	1	5	163	19.1	8.25
G3HQV2	Serine/threonine-protein kinase OSR1 OS=Cricetulus griseus GN=I79_013208 PE=4 SV=1 - [G3HQV2_CRIGR]	59.96	0.054	1	2	2	5	426	47.5	9.06
G3HZY0	Glycogen [starch] synthase, muscle OS=Cricetulus griseus GN=I79_016645 PE=4 SV=1 - [G3HZY0_CRIGR]	25.1	0.0162	2	1	1	5	495	56.3	7.23
G3IEE6	Spermidine synthase OS=Cricetulus griseus GN=I79_022093 PE=3 SV=1 - [G3IEE6_CRIGR]	45.3	0.0906	2	2	2	5	254	28.7	5.48
G3H7M3	Adenylosuccinate synthetase OS=Cricetulus griseus GN=I79_006358 PE=3 SV=1 - [G3H7M3_CRIGR]	144.54	0.1662	1	1	4	5	355	39.5	6.87
G3IPK9	Adenylate kinase 2, mitochondrial OS=Cricetulus griseus GN=I79_025923 PE=4 SV=1 - [G3IPK9_CRIGR]	125.71	0.5584	1	2	2	5	77	8.7	7.28
P62194	26S protease regulatory subunit 8 OS=Bos taurus GN=PSMC5 PE=2 SV=1 - [PRS8_BOVIN]	123.54	0.0714	2	2	2	4	406	45.6	7.55
Q3T003	60S ribosomal protein L18a OS=Bos taurus GN=RPL18A PE=2 SV=1 - [RL18A_BOVIN]	98.44	0.1705	2	3	3	4	176	20.7	10.71
G3HXW9	Alpha-centractin OS=Cricetulus griseus GN=I79_015885 PE=3 SV=1 - [G3HXW9_CRIGR]	22.02	0.0931	1	2	3	4	376	42.6	6.64
G3HGH4	Small nuclear ribonucleoprotein Sm D1 OS=Cricetulus griseus GN=I79_009701 PE=4 SV=1 - [G3HGH4_CRIGR]	57.44	0.2605	1	2	2	4	119	13.3	11.56
Q5E9D1	Small ubiquitin-related modifier 1 OS=Bos taurus GN=SUMO1 PE=3 SV=1 - [SUMO1_BOVIN]	127.11	0.1584	1	1	1	4	101	11.5	5.52
Q3T140	Dynein light chain roadblock-type 1 OS=Bos taurus GN=DYNLRB1 PE=3 SV=1 - [DLRB1_BOVIN]	40.62	0.3438	2	2	2	4	96	11	7.25
P81623	Endoplasmic reticulum resident protein 29 OS=Bos taurus GN=ERP29 PE=1 SV=2 - [ERP29_BOVIN]	46.84	0.1047	1	1	2	4	258	28.8	5.82
Q56JW4	Adenine phosphoribosyltransferase OS=Bos taurus GN=APRT PE=2 SV=1 - [APT_BOVIN]	122.43	0.0556	1	1	1	4	180	19.5	7.72
P35466	Protein S100-A4 OS=Bos taurus GN=S100A4 PE=1 SV=2 - [S10A4_BOVIN]	60.24	0.0891	1	1	2	4	101	11.8	6.11
Q3T0U2	60S ribosomal protein L14 OS=Bos taurus GN=RPL14 PE=2 SV=3 - [RL14_BOVIN]	209.12	0.0561	1	1	1	4	214	23.4	10.78
Q2KIW6	26S protease regulatory subunit 10B OS=Bos taurus GN=PSMC6 PE=2 SV=1 - [PRS10_BOVIN]	60.92	0.0746	2	2	2	4	389	44	7.2
P81134	Renin receptor OS=Bos taurus GN=ATP6AP2 PE=1 SV=2 - [RENR_BOVIN]	31.76	0.0228	1	1	1	4	351	39.5	5.55
Q2KI84	Histidine--tRNA ligase, cytoplasmic OS=Bos taurus GN=HARS PE=2 SV=1 - [SYHC_BOVIN]	75.91	0.0511	3	1	3	4	509	57.2	6.04
Q3SZ18	Hypoxanthine-guanine phosphoribosyltransferase OS=Bos taurus GN=HPRT1 PE=2 SV=3 - [HPRT_BOVIN]	153.94	0.0596	1	1	1	4	218	24.5	7.81
Q0VBZ9	MARCKS-related protein OS=Bos taurus GN=MARCKSL1 PE=2 SV=1 - [MRP_BOVIN]	107.4	0.0758	1	1	1	4	198	19.8	4.69
Q2TBP7	C-Myc-binding protein OS=Bos taurus GN=MYCBP PE=3 SV=3 - [MYCBP_BOVIN]	73.52	0.1068	1	1	1	4	103	12	5.91
P13135	Calpain small subunit 1 OS=Bos taurus GN=CAPNS1 PE=2 SV=1 - [CPNS1_BOVIN]	62.79	0.057	2	2	2	4	263	27.9	5.2
G3HHX7	Superkiller viralicidic activity 2-like 2 OS=Cricetulus griseus GN=I79_010238 PE=4 SV=1 - [G3HHX7_CRIGR]	138.28	0.0118	1	1	1	4	851	96.1	6.1
G3GVA8	Aminoacyl tRNA synthetase complex-interacting multifunctional protein 2 OS=Cricetulus griseus GN=I79_001643 PE=4 SV=1 - [G3GVA8_CRIGR]	42.39	0.0781	2	2	2	4	320	35.4	7.81
G3H8P6	Dual specificity mitogen-activated protein kinase kinase 5 OS=Cricetulus griseus GN=I79_006754 PE=3 SV=1 - [G3H8P6_CRIGR]	83.79	0.0097	1	1	1	4	719	78.4	5.05
G3ICS3	Cullin-3 OS=Cricetulus griseus GN=I79_021472 PE=3 SV=1 - [G3ICS3_CRIGR]	50.57	0.0308	1	2	2	4	746	86.4	7.99
G3I2D8	Band 4.1-like protein 2 OS=Cricetulus griseus GN=I79_017569 PE=4 SV=1 - [G3I2D8_CRIGR]	47.91	0.0233	1	2	2	4	1032	115.5	5.36
G3ICE3	COP9 signalosome complex subunit 5 OS=Cricetulus griseus GN=I79_021338 PE=4 SV=1 - [G3ICE3_CRIGR]	39.8	0.0703	1	3	3	4	327	37	6.54
G3H7G7	Polypeptide N-acetylgalactosaminyltransferase 12 (Fragment) OS=Cricetulus griseus GN=I79_006298 PE=3 SV=1 - [G3H7G7_CRIGR]	28.67	0.0153	1	1	1	4	457	53.3	6.23
G3H4X1	Ribulose-phosphate 3-epimerase OS=Cricetulus griseus GN=I79_005334 PE=3 SV=1 - [G3H4X1_CRIGR]	25.4	0.0307	1	1	1	4	228	24.9	5.41
G3GVI3	Serine hydroxymethyltransferase OS=Cricetulus griseus GN=I79_001722 PE=1 SV=1 - [G3GVI3_CRIGR]	192.18	0.0534	1	1	2	4	412	45.8	5.72
G3IP80	Acyl-protein thioesterase 2 OS=Cricetulus griseus GN=I79_025784 PE=4 SV=1 - [G3IP80_CRIGR]	32.6	0.0488	1	1	1	4	164	17.7	7.42
G3I2D2	Tyrosine-protein kinase Lyn OS=Cricetulus griseus GN=I79_017561 PE=4 SV=1 - [G3I2D2_CRIGR]	63.09	0.2079	26	1	2	4	101	12.1	4.77
G3I2V6	Plexin-B2 OS=Cricetulus griseus GN=I79_017750 PE=4 SV=1 - [G3I2V6_CRIGR]	62.69	0.0165	3	3	3	4	1753	195	5.68
G3GVD4	Trinucleotide repeat-containing gene 18 protein OS=Cricetulus griseus GN=I79_001670 PE=4 SV=1 - [G3GVD4_CRIGR]	66.83	0.0075	1	1	1	4	1073	114	9.26
G3GTT2	C-C motif chemokine 2 OS=Cricetulus griseus GN=I79_001071 PE=4 SV=1 - [G3GTT2_CRIGR]	32.25	0.0559	1	1	1	4	143	15.8	9.16
A5PK65	D-dopachrome decarboxylase OS=Bos taurus GN=DDT PE=3 SV=1 - [DOPD_BOVIN]	57.09	0.0593	2	1	1	4	118	12.9	7.2
G3IDL3	Interferon-inducible protein OS=Cricetulus griseus GN=I79_021796 PE=4 SV=1 - [G3IDL3_CRIGR]	101.98	0.0584	2	1	1	4	137	15	8.31
G3H3C9	GTPase KRas OS=Cricetulus griseus GN=I79_004744 PE=4 SV=1 - [G3H3C9_CRIGR]	82.38	0.1484	2	1	2	4	155	17.4	5.22
G3HPJ3	Alpha-amylase OS=Cricetulus griseus GN=I79_012707 PE=3 SV=1 - [G3HPJ3_CRIGR]	113.97	0.0239	1	1	1	4	418	46.9	8
G3HUV6	Cysteine-rich motor neuron 1 protein OS=Cricetulus griseus GN=I79_014724 PE=4 SV=1 - [G3HUV6_CRIGR]	155.94	0.0349	1	1	1	4	344	37.6	4.91
G3H2W6	Extracellular matrix protein 1 OS=Cricetulus griseus GN=I79_004569 PE=4 SV=1 - [G3H2W6_CRIGR]	122.32	0.0426	1	2	2	4	563	63.2	6.8
G3I4G8	BolA-like protein 2 OS=Cricetulus griseus GN=I79_018347 PE=3 SV=1 - [G3I4G8_CRIGR]	65.21	0.1047	1	1	1	4	86	10.1	6.15
G3H7F1	Nuclear cap-binding protein subunit 1 OS=Cricetulus griseus GN=I79_006282 PE=4 SV=1 - [G3H7F1_CRIGR]	21.12	0.0379	1	2	2	4	581	67.7	6.54
G3I9X6	Spectrin alpha chain, brain OS=Cricetulus griseus GN=I79_020387 PE=4 SV=1 - [G3I9X6_CRIGR]	29.24	0.107	1	2	2	4	215	24.9	4.87
Q8HXY9-2	Isoform 2 of Craniofacial development protein 1 OS=Bos taurus GN=CFDP1 - [CFDP1_BOVIN]	71.72	0.0465	3	1	1	4	215	23.8	4.54
G3HG11	Receptor-type tyrosine-protein phosphatase delta OS=Cricetulus griseus GN=I79_009530 PE=4 SV=1 - [G3HG11_CRIGR]	26.18	0.0064	2	1	1	4	1707	191.8	6.57
G3ILP4	60S ribosomal protein L9 OS=Cricetulus griseus GN=I79_024815 PE=4 SV=1 - [G3ILP4_CRIGR]	71.78	0.0521	3	1	1	4	192	21.9	9.95
G3H9B2	Myoferlin OS=Cricetulus griseus GN=I79_006979 PE=4 SV=1 - [G3H9B2_CRIGR]	103.92	0.0145	1	2	2	4	1449	163.5	6.24
G3HUC0	Anionic trypsin-2 (Fragment) OS=Cricetulus griseus GN=I79_014528 PE=3 SV=1 - [G3HUC0_CRIGR]	71.05	0.0461	2	1	1	4	217	23.2	5.27
G3HH35	60S ribosomal protein L36a OS=Cricetulus griseus GN=I79_009931 PE=4 SV=1 - [G3HH35_CRIGR]	65.74	0.0865	4	1	1	4	104	12.1	10.76
Q3T114	Ribonuclease UK114 OS=Bos taurus GN=HRSP12 PE=2 SV=3 - [UK114_BOVIN]	59.24	0.0803	1	1	1	4	137	14.3	6.65
G3I1P5	SH3 domain-binding glutamic acid-rich-like protein OS=Cricetulus griseus GN=I79_017308 PE=3 SV=1 - [G3I1P5_CRIGR]	221.31	0.2018	2	2	2	4	114	12.7	5.07
G3GXG0	Cullin-1 OS=Cricetulus griseus GN=I79_002450 PE=3 SV=1 - [G3GXG0_CRIGR]	65.52	0.0451	1	3	3	4	776	89.7	8
G3IA10	Heterogeneous nuclear ribonucleoprotein U-like protein 1 OS=Cricetulus griseus GN=I79_020426 PE=4 SV=1 - [G3IA10_CRIGR]	157.64	0.007	1	1	1	4	1566	176.4	7.2
G3HHE3	Leucyl-tRNA synthetase, cytoplasmic OS=Cricetulus griseus GN=I79_010043 PE=3 SV=1 - [G3HHE3_CRIGR]	53.9	0.0619	1	3	3	4	727	83.4	7.42
G3HYY3	Urokinase plasminogen activator surface receptor OS=Cricetulus griseus GN=I79_016276 PE=4 SV=1 - [G3HYY3_CRIGR]	94.97	0.0538	1	1	1	4	186	20.3	5.12
G3IEB7	Out at first protein-like OS=Cricetulus griseus GN=I79_022062 PE=4 SV=1 - [G3IEB7_CRIGR]	209.87	0.0789	1	1	1	4	152	17.7	8.06
Q3SZC1	GrpE protein homolog 1, mitochondrial OS=Bos taurus GN=GRPEL1 PE=1 SV=1 - [GRPE1_BOVIN]	86.5	0.1014	2	2	2	4	217	24.3	8.13
G3HYD5	Protocadherin-1 OS=Cricetulus griseus GN=I79_016060 PE=4 SV=1 - [G3HYD5_CRIGR]	139.23	0.0384	1	2	2	4	756	82.1	5.38
G3ING0	Tight junction protein ZO-2 OS=Cricetulus griseus GN=I79_025481 PE=4 SV=1 - [G3ING0_CRIGR]	120.36	0.0374	1	1	1	4	294	32.5	5.07
Q32KV6	Nucleotide exchange factor SIL1 OS=Bos taurus GN=SIL1 PE=2 SV=1 - [SIL1_BOVIN]	165.81	0.0281	1	1	1	4	462	52.5	5.74
G3GS69	FERM, RhoGEF and pleckstrin domain-containing protein 1 OS=Cricetulus griseus GN=I79_000382 PE=4 SV=1 - [G3GS69_CRIGR]	55.27	0.0257	1	2	2	4	1049	118.7	7.87
G3HSE8	Ras-related protein R-Ras2 (Fragment) OS=Cricetulus griseus GN=I79_013779 PE=4 SV=1 - [G3HSE8_CRIGR]	110.22	0.1558	1	2	2	4	154	18.1	5.02
A6QLN9	von Willebrand factor A domain-containing protein 1 OS=Bos taurus PE=2 SV=1 - [VWA1_BOVIN]	185.1	0.0339	1	1	1	4	413	43.7	8.68
Q3SZN2	Protein transport protein Sec23B OS=Bos taurus GN=SEC23B PE=2 SV=1 - [SC23B_BOVIN]	154.97	0.03	3	2	2	4	767	86.4	7.09
G3I2M2	Phosphoserine phosphatase OS=Cricetulus griseus GN=I79_017662 PE=4 SV=1 - [G3I2M2_CRIGR]	77.51	0.108	1	2	2	4	250	27.8	6.42
G3H2J7	Chromobox protein-like 3 OS=Cricetulus griseus GN=I79_004410 PE=4 SV=1 - [G3H2J7_CRIGR]	115.77	0.1518	1	1	2	4	191	21.2	7.23
G3HTI3	Putative G-protein coupled receptor 111 OS=Cricetulus griseus GN=I79_014208 PE=4 SV=1 - [G3HTI3_CRIGR]	20.96	0.0098	1	1	1	4	1424	158.1	8.65
G3HF38	Basigin OS=Cricetulus griseus GN=I79_009191 PE=4 SV=1 - [G3HF38_CRIGR]	121.49	0.0755	1	2	2	4	437	47.9	7.68
G3HSA7	Thioredoxin domain-containing protein 17 OS=Cricetulus griseus GN=I79_013736 PE=4 SV=1 - [G3HSA7_CRIGR]	185.73	0.0795	1	1	1	4	176	19.6	5.85
G3IHB4	Endothelial differentiation-related factor 1 OS=Cricetulus griseus GN=I79_023202 PE=4 SV=1 - [G3IHB4_CRIGR]	27.84	0.1415	2	1	1	4	106	11.7	9.99
G3GTH2	Na(+)/H(+) exchange regulatory cofactor NHE-RF1 OS=Cricetulus griseus GN=I79_000956 PE=1 SV=1 - [G3GTH2_CRIGR]	222.59	0.048	1	1	1	4	354	38.6	5.9
G3HB42	Heme-binding protein 1 OS=Cricetulus griseus GN=I79_007657 PE=4 SV=1 - [G3HB42_CRIGR]	56.73	0.0842	2	1	1	4	190	21.2	5.26
G3HCI9	Scaffold attachment factor B1 OS=Cricetulus griseus GN=I79_008200 PE=4 SV=1 - [G3HCI9_CRIGR]	30.14	0.0226	1	1	1	4	929	102.8	5.21
G3GXB1	THO complex subunit 4 OS=Cricetulus griseus GN=I79_002401 PE=4 SV=1 - [G3GXB1_CRIGR]	30.38	0.3369	2	3	3	4	187	20	9.92
G3H8D0	Guanine nucleotide-binding protein G(I), alpha-2 subunit OS=Cricetulus griseus GN=I79_006630 PE=4 SV=1 - [G3H8D0_CRIGR]	45.5	0.1065	7	1	3	4	338	38.7	5.43
G3IKF5	Espin OS=Cricetulus griseus GN=I79_024357 PE=4 SV=1 - [G3IKF5_CRIGR]	0	0.009	1	1	1	4	1225	133.6	5.85
G3ICW1	Osteoclast-stimulating factor 1 OS=Cricetulus griseus GN=I79_021516 PE=4 SV=1 - [G3ICW1_CRIGR]	68.67	0.1121	2	2	2	4	214	23.7	5.68
G3H8K2	Mannosyl-oligosaccharide 1,2-alpha-mannosidase IA OS=Cricetulus griseus GN=I79_006704 PE=4 SV=1 - [G3H8K2_CRIGR]	51.39	0.0915	1	3	3	4	492	56	6.49
G3HP69	Calnexin OS=Cricetulus griseus GN=I79_012575 PE=3 SV=1 - [G3HP69_CRIGR]	158.69	0.0271	1	1	1	4	591	67.2	4.63
G3I303	DNA-directed RNA polymerases I, II, and III subunit RPABC3 OS=Cricetulus griseus GN=I79_017801 PE=4 SV=1 - [G3I303_CRIGR]	78.95	0.08	1	1	1	3	150	17.1	4.68
A6H769	40S ribosomal protein S7 OS=Bos taurus GN=RPS7 PE=2 SV=1 - [RS7_BOVIN]	89.02	0.0567	1	1	1	3	194	22.1	10.1
Q29RI6	Calcium-binding protein 39 OS=Bos taurus GN=CAB39 PE=2 SV=1 - [CAB39_BOVIN]	104.06	0.0762	2	2	2	3	341	39.8	6.89
Q32PB9	60S ribosomal protein L38 OS=Bos taurus GN=RPL38 PE=3 SV=4 - [RL38_BOVIN]	86.35	0.1857	1	1	1	3	70	8.2	10.1
F7J0L2	Splicing factor, arginine/serine-rich 1 (Fragment) OS=Cricetulus griseus GN=Srsf1 PE=2 SV=1 - [F7J0L2_CRIGR]	43.3	0.0766	1	2	2	3	248	27.7	10.36
Q3T0C7	Stathmin OS=Bos taurus GN=STMN1 PE=2 SV=3 - [STMN1_BOVIN]	61.32	0.0604	2	1	1	3	149	17.3	5.97
G3I886	TRM112-like protein OS=Cricetulus griseus GN=I79_019749 PE=4 SV=1 - [G3I886_CRIGR]	25.83	0.208	2	2	2	3	125	14.1	5.27
G3GRI8	cAMP-regulated phosphoprotein 19 OS=Cricetulus griseus GN=I79_000135 PE=4 SV=1 - [G3GRI8_CRIGR]	55.55	0.1146	7	1	1	3	96	10.6	9.7
Q2KIS1	N-acylglucosamine 2-epimerase OS=Bos taurus GN=RENBP PE=2 SV=2 - [RENBP_BOVIN]	63.98	0.0139	2	1	1	3	432	49.3	6.09
Q03763	Desmoglein-1 OS=Bos taurus GN=DSG1 PE=1 SV=1 - [DSG1_BOVIN]	102.3	0.0134	1	1	1	3	1043	112.2	5.08
Q29437	Primary amine oxidase, liver isozyme OS=Bos taurus PE=1 SV=1 - [AOCX_BOVIN]	22.47	0.0105	1	1	1	3	762	84.7	5.94
Q29RK4	UV excision repair protein RAD23 homolog B OS=Bos taurus GN=RAD23B PE=2 SV=1 - [RD23B_BOVIN]	75.14	0.0466	1	1	1	3	408	43.1	4.84
Q3MHN2	Complement component C9 OS=Bos taurus GN=C9 PE=2 SV=1 - [CO9_BOVIN]	37.23	0.0967	1	2	2	3	548	62	5.9
Q0VCM5	Inter-alpha-trypsin inhibitor heavy chain H1 OS=Bos taurus GN=ITIH1 PE=2 SV=1 - [ITIH1_BOVIN]	53.17	0.0132	1	1	1	3	906	101.2	7.4
Q2KIX7	Protein HP-25 homolog 1 OS=Bos taurus PE=1 SV=1 - [HP251_BOVIN]	25.98	0.1792	2	2	3	3	212	22.5	7.46
P33433	Histidine-rich glycoprotein (Fragments) OS=Bos taurus GN=HRG PE=1 SV=1 - [HRG_BOVIN]	167.29	0.0404	1	1	1	3	396	44.4	7.46
P81644	Apolipoprotein A-II OS=Bos taurus GN=APOA2 PE=1 SV=2 - [APOA2_BOVIN]	172.22	0.16	1	1	1	3	100	11.2	8.1
Q3ZBH9	DNA replication licensing factor MCM7 OS=Bos taurus GN=MCM7 PE=2 SV=1 - [MCM7_BOVIN]	26.76	0.032	1	2	2	3	719	81.3	6.11
Q56JY1	60S ribosomal protein L35a OS=Bos taurus GN=RPL35A PE=3 SV=1 - [RL35A_BOVIN]	49.57	0.0727	1	1	1	3	110	12.5	11.06
P08814	Parathymosin OS=Bos taurus GN=PTMS PE=1 SV=2 - [PTMS_BOVIN]	56.55	0.1078	1	1	1	3	102	11.5	4.12
Q3ZBI6	Four and a half LIM domains protein 3 OS=Bos taurus GN=FHL3 PE=2 SV=1 - [FHL3_BOVIN]	54.96	0.0357	2	1	1	3	280	31.2	6.05
A4FV08	Glucosamine-6-phosphate isomerase 1 OS=Bos taurus GN=GNPDA1 PE=2 SV=1 - [GNPI1_BOVIN]	42.84	0.0969	3	3	3	3	289	32.6	6.92
A5PJM5	Mini-chromosome maintenance complex-binding protein OS=Bos taurus GN=MCMBP PE=2 SV=1 - [MCMBP_BOVIN]	36.08	0.0171	1	1	1	3	642	73	5.96
Q28207	Islet amyloid polypeptide OS=Bos taurus GN=IAPP PE=3 SV=2 - [IAPP_BOVIN]	38.35	0.0549	9	1	1	3	91	9.9	9.73
G3H284	Endoplasmic reticulum resident protein 29 OS=Cricetulus griseus GN=I79_004255 PE=3 SV=1 - [G3H284_CRIGR]	112.83	0.0808	1	1	2	3	260	28.6	6.62
G3IMH4	Sphingomyelin phosphodiesterase OS=Cricetulus griseus GN=I79_025113 PE=4 SV=1 - [G3IMH4_CRIGR]	53.01	0.0169	1	1	1	3	593	66.2	7.05
G3IKN5	Glutathione S-transferase omega-1 OS=Cricetulus griseus GN=I79_024438 PE=3 SV=1 - [G3IKN5_CRIGR]	53.33	0.0692	1	2	2	3	318	36.5	6.9
G3GTV0	Schlafen family member 5 OS=Cricetulus griseus GN=I79_001089 PE=4 SV=1 - [G3GTV0_CRIGR]	34.03	0.0075	2	1	1	3	805	91.6	6.9
G3H289	Aldehyde dehydrogenase, mitochondrial OS=Cricetulus griseus GN=I79_004260 PE=3 SV=1 - [G3H289_CRIGR]	70.56	0.064	2	2	2	3	422	45.9	5.8
G3I6H5	Fermitin family-like 2 OS=Cricetulus griseus GN=I79_019099 PE=4 SV=1 - [G3I6H5_CRIGR]	63.14	0.0243	1	1	1	3	575	65.6	6.3
G3H0Y9	EH domain-containing protein 4 OS=Cricetulus griseus GN=I79_003809 PE=4 SV=1 - [G3H0Y9_CRIGR]	70.97	0.0127	1	1	1	3	628	71.7	5.71
G3H200	Acid sphingomyelinase-like phosphodiesterase 3b OS=Cricetulus griseus GN=I79_004199 PE=4 SV=1 - [G3H200_CRIGR]	145.4	0.0306	1	1	1	3	392	44.6	6.27
G3H7Q0	Shootin-1 OS=Cricetulus griseus GN=I79_006386 PE=4 SV=1 - [G3H7Q0_CRIGR]	46.92	0.0732	1	2	2	3	287	33.5	4.96
G3HAU7	NudC domain-containing protein 1 OS=Cricetulus griseus GN=I79_007556 PE=4 SV=1 - [G3HAU7_CRIGR]	30.08	0.0365	1	1	1	3	438	49.8	5.4
G3I2X8	CCR4-NOT transcription complex subunit 1 OS=Cricetulus griseus GN=I79_017774 PE=4 SV=1 - [G3I2X8_CRIGR]	27.86	0.0118	1	2	2	3	1520	172.6	7.34
G3IFA9	Transcription elongation factor B polypeptide 2 OS=Cricetulus griseus GN=I79_022430 PE=4 SV=1 - [G3IFA9_CRIGR]	99.1	0.0936	1	1	1	3	267	30.3	9.58
G3HBR8	Hemoglobin subunit alpha OS=Cricetulus griseus GN=I79_007867 PE=3 SV=1 - [G3HBR8_CRIGR]	103.88	0.1056	2	1	1	3	142	15.2	7.39
G3IAZ4	Cysteine-rich protein 1 OS=Cricetulus griseus GN=I79_020780 PE=4 SV=1 - [G3IAZ4_CRIGR]	28.3	0.1429	2	2	2	3	70	7.8	8.38
G3GRE0	3'(2'),5'-bisphosphate nucleotidase 1 OS=Cricetulus griseus GN=I79_000085 PE=4 SV=1 - [G3GRE0_CRIGR]	35.22	0.0552	2	2	2	3	308	33.2	6.09
G3I136	Leukemia inhibitory factor OS=Cricetulus griseus GN=I79_017082 PE=4 SV=1 - [G3I136_CRIGR]	44.3	0.0633	1	1	1	3	158	17.4	8.88
G3HEJ4	Neogenin OS=Cricetulus griseus GN=I79_008978 PE=4 SV=1 - [G3HEJ4_CRIGR]	45.97	0.0149	1	2	2	3	1405	154.4	6.64
G3HI29	Ceroid-lipofuscinosis neuronal protein 5 OS=Cricetulus griseus GN=I79_010294 PE=4 SV=1 - [G3HI29_CRIGR]	39.67	0.033	1	1	1	3	273	32	6.09
G3IH20	Alpha-1,6-mannosyl-glycoprotein 2-beta-N-acetylglucosaminyltransferase OS=Cricetulus griseus GN=I79_023098 PE=4 SV=1 - [G3IH20_CRIGR]	37.45	0.052	1	2	2	3	442	51.2	8.6
G3I054	Proteasome assembly chaperone 1 OS=Cricetulus griseus GN=I79_016730 PE=4 SV=1 - [G3I054_CRIGR]	107.5	0.0346	1	1	1	3	289	32.9	6.52
Q2KJ64	Arginase-1 OS=Bos taurus GN=ARG1 PE=2 SV=1 - [ARGI1_BOVIN]	32.57	0.0342	1	1	1	3	322	35	6.54
G3HV73	Poly [ADP-ribose] polymerase 1 OS=Cricetulus griseus GN=I79_014850 PE=4 SV=1 - [G3HV73_CRIGR]	33.65	0.0391	2	3	3	3	971	107.6	8.85
G3HYL0	Eukaryotic translation initiation factor 4 gamma 2 OS=Cricetulus griseus GN=I79_016148 PE=4 SV=1 - [G3HYL0_CRIGR]	53.05	0.0255	2	2	2	3	783	88.4	5.9
G3I6K0	Putative ATP-dependent RNA helicase DDX23 OS=Cricetulus griseus GN=I79_019124 PE=3 SV=1 - [G3I6K0_CRIGR]	0	0.0147	1	1	1	3	819	95.4	9.57
Q5BIR5	Serpin B8 OS=Bos taurus GN=SERPINB8 PE=2 SV=1 - [SPB8_BOVIN]	46.06	0.0267	4	1	1	3	374	42.1	6.54
G3H6Y3	Syntenin-2 OS=Cricetulus griseus GN=I79_006107 PE=4 SV=1 - [G3H6Y3_CRIGR]	58.36	0.1122	1	1	1	3	98	10.7	9.35
G3HLI6	MAGUK p55 subfamily member 2 OS=Cricetulus griseus GN=I79_011575 PE=3 SV=1 - [G3HLI6_CRIGR]	58.62	0.0157	1	1	1	3	636	71.1	6.86
G3I431	von Willebrand factor A domain-containing protein 1 OS=Cricetulus griseus GN=I79_018210 PE=4 SV=1 - [G3I431_CRIGR]	82.13	0.065	1	2	2	3	446	48.2	6.96
A1L5A6	Proteasomal ubiquitin receptor ADRM1 OS=Bos taurus GN=ADRM1 PE=2 SV=1 - [ADRM1_BOVIN]	54.21	0.0221	2	1	1	3	407	41.9	4.91
G3IH36	Small ubiquitin-related modifier 2 OS=Cricetulus griseus GN=I79_023115 PE=4 SV=1 - [G3IH36_CRIGR]	84.75	0.1263	4	1	1	3	95	10.8	5.5
G3IFL2	Multifunctional protein ADE2 OS=Cricetulus griseus GN=I79_022535 PE=4 SV=1 - [G3IFL2_CRIGR]	102.24	0.1264	1	1	1	3	87	9.5	7.87
G3I4A6	Mps one binder kinase activator-like 1B OS=Cricetulus griseus GN=I79_018283 PE=4 SV=1 - [G3I4A6_CRIGR]	93.29	0.1528	1	1	1	3	72	8.7	8.57
Q95JC7	Neutral amino acid transporter B(0) OS=Bos taurus GN=SLC1A5 PE=2 SV=1 - [AAAT_BOVIN]	135.66	0.0204	1	1	1	3	539	56.4	5.76
G3H125	Neutral amino acid transporter A OS=Cricetulus griseus GN=I79_003849 PE=4 SV=1 - [G3H125_CRIGR]	162.77	0.0207	1	1	1	3	532	56.3	5.6
G3HP49	Tetranectin OS=Cricetulus griseus GN=I79_012553 PE=4 SV=1 - [G3HP49_CRIGR]	88.51	0.1139	2	2	2	3	202	22.3	5.69
G3I5E0	Methylosome subunit pICln OS=Cricetulus griseus GN=I79_018685 PE=4 SV=1 - [G3I5E0_CRIGR]	108.54	0.0551	1	1	1	3	236	26.1	4.13
G3IDL5	Plakophilin-3 OS=Cricetulus griseus GN=I79_021798 PE=4 SV=1 - [G3IDL5_CRIGR]	45.77	0.0281	2	2	2	3	711	77.9	9.42
G3IKQ6	Cystatin-B OS=Cricetulus griseus GN=I79_024459 PE=4 SV=1 - [G3IKQ6_CRIGR]	93.66	0.1224	1	1	1	3	98	11.2	7.43
G3HHA9	Annexin OS=Cricetulus griseus GN=I79_010006 PE=3 SV=1 - [G3HHA9_CRIGR]	94.46	0.0239	3	1	1	3	503	54.1	7.65
G3I3C2	Protein TSSC1 OS=Cricetulus griseus GN=I79_017926 PE=4 SV=1 - [G3I3C2_CRIGR]	33.23	0.0337	1	1	1	3	386	43.1	5.15
G3HUD4	Proteasome activator complex subunit 1 OS=Cricetulus griseus GN=I79_014542 PE=4 SV=1 - [G3HUD4_CRIGR]	158.34	0.1412	2	1	1	3	85	10	6.14
G3HWQ0	60S ribosomal protein L27a OS=Cricetulus griseus GN=I79_015428 PE=3 SV=1 - [G3HWQ0_CRIGR]	65.13	0.0876	2	1	1	3	137	16.1	11
Q3ZBN0	Costars family protein ABRACL OS=Bos taurus GN=ABRACL PE=3 SV=1 - [ABRAL_BOVIN]	201.36	0.1605	2	1	1	3	81	9	6.29
G3HC56	Ephrin-A1 OS=Cricetulus griseus GN=I79_008006 PE=3 SV=1 - [G3HC56_CRIGR]	43.29	0.0537	1	1	1	3	205	23.6	6.89
G3I8V8	DnaJ-like subfamily A member 1 OS=Cricetulus griseus GN=I79_019990 PE=4 SV=1 - [G3I8V8_CRIGR]	123.39	0.0793	2	1	1	3	164	18.1	9.14
G3HJJ1	Ribose-5-phosphate isomerase OS=Cricetulus griseus GN=I79_010838 PE=4 SV=1 - [G3HJJ1_CRIGR]	136.53	0.2123	1	3	3	3	179	19.8	7.28
G3HH26	Exocyst complex component 4 OS=Cricetulus griseus GN=I79_009921 PE=4 SV=1 - [G3HH26_CRIGR]	128.96	0.0315	1	1	1	3	445	50.6	5.87
Q6E6J6	Chromobox protein-like 5 OS=Cricetulus griseus GN=HP1 alpha PE=2 SV=1 - [Q6E6J6_CRIGR]	105.61	0.0628	1	1	1	3	191	22.2	5.86
G3GVV9	D-tyrosyl-tRNA(Tyr) deacylase OS=Cricetulus griseus GN=I79_001862 PE=3 SV=1 - [G3GVV9_CRIGR]	203.69	0.0766	2	1	1	3	209	23.3	7.87
G3H2A5	Vacuolar protein sorting-associated protein 29 OS=Cricetulus griseus GN=I79_004275 PE=4 SV=1 - [G3H2A5_CRIGR]	34.52	0.1257	2	2	2	3	183	20.6	7.01
G3H584	SPARC OS=Cricetulus griseus GN=I79_005459 PE=4 SV=1 - [G3H584_CRIGR]	26.98	0.0562	2	1	1	3	249	28.2	4.88
G3HH63	Phospholipase A-2-activating protein OS=Cricetulus griseus GN=I79_009960 PE=4 SV=1 - [G3HH63_CRIGR]	100.3	0.0214	1	1	1	3	795	87.1	6.16
G3IA31	Placenta-specific gene 8 protein OS=Cricetulus griseus GN=I79_020447 PE=4 SV=1 - [G3IA31_CRIGR]	103.57	0.1339	1	1	1	3	112	12.3	7.58
G3HWL5	Vacuolar protein sorting-associated protein 28-like OS=Cricetulus griseus GN=I79_015347 PE=4 SV=1 - [G3HWL5_CRIGR]	67.41	0.0814	2	2	2	3	221	25.5	5.54
P79132	Caveolin-1 OS=Bos taurus GN=CAV1 PE=2 SV=1 - [CAV1_BOVIN]	34.7	0.0787	1	1	1	3	178	20.6	6.02
G3HQ88	Bcl-2-like protein 13 OS=Cricetulus griseus GN=I79_012983 PE=4 SV=1 - [G3HQ88_CRIGR]	47.41	0.0346	1	1	1	3	433	46.2	4.5
G3IAG1	Guanine nucleotide-binding protein G(Q) subunit alpha OS=Cricetulus griseus GN=I79_020584 PE=4 SV=1 - [G3IAG1_CRIGR]	21.82	0.0636	1	1	1	3	220	25.6	5.69
G3H2U4	BolA-like protein 1 OS=Cricetulus griseus GN=I79_004546 PE=3 SV=1 - [G3H2U4_CRIGR]	58.16	0.136	1	1	1	3	125	13	8.59
G3I473	Growth-regulated alpha protein OS=Cricetulus griseus GN=I79_018249 PE=3 SV=1 - [G3I473_CRIGR]	81.2	0.1584	1	1	1	3	101	10.9	9.91
G3I0I7	S-methyl-5'-thioadenosine phosphorylase OS=Cricetulus griseus GN=Mtap PE=3 SV=1 - [G3I0I7_CRIGR]	104.19	0.108	2	2	2	3	324	35.6	7.91
G3I1R6	Epididymal secretory protein E3-beta OS=Cricetulus griseus GN=I79_017334 PE=3 SV=1 - [G3I1R6_CRIGR]	64.07	0.0409	1	1	1	3	342	38.9	8.63
G3GVW2	Putative hydrolase RBBP9 OS=Cricetulus griseus GN=I79_001864 PE=4 SV=1 - [G3GVW2_CRIGR]	24.26	0.086	1	1	1	3	186	21	6.28
G3HEW0	Protein dpy-30-like OS=Cricetulus griseus GN=I79_009107 PE=4 SV=1 - [G3HEW0_CRIGR]	53.33	0.1616	2	1	1	3	99	11.2	4.88
G3IBK8	V-type proton ATPase subunit S1 OS=Cricetulus griseus GN=I79_021034 PE=4 SV=1 - [G3IBK8_CRIGR]	106.17	0.0612	2	2	2	3	441	48.9	5.97
G3I2Q7	Transcription intermediary factor 1-beta OS=Cricetulus griseus GN=I79_017700 PE=4 SV=1 - [G3I2Q7_CRIGR]	79.8	0.0374	1	1	1	3	535	58	6.29
G3H938	Protein archease OS=Cricetulus griseus GN=I79_006899 PE=4 SV=1 - [G3H938_CRIGR]	67.78	0.1737	3	2	2	3	167	19.6	4.51
Q3SWZ3	Syntaxin-4 OS=Bos taurus GN=STX4 PE=2 SV=1 - [STX4_BOVIN]	66.47	0.064	2	1	1	3	297	34.4	6.58
G3H2S5	RNA-binding protein 8A OS=Cricetulus griseus GN=I79_004496 PE=4 SV=1 - [G3H2S5_CRIGR]	92.73	0.1111	3	1	1	3	171	19.5	5.72
G3GWV9	Nucleoprotein TPR OS=Cricetulus griseus GN=I79_002244 PE=4 SV=1 - [G3GWV9_CRIGR]	36.19	0.0085	1	1	1	3	2122	238.6	4.98
G3H571	Histidine triad nucleotide-binding protein 1 OS=Cricetulus griseus GN=I79_005446 PE=4 SV=1 - [G3H571_CRIGR]	61.59	0.2474	1	1	1	3	97	10.6	6.62
G3IIU8	Acyl carrier protein OS=Cricetulus griseus GN=I79_023776 PE=3 SV=1 - [G3IIU8_CRIGR]	29.04	0.0962	2	1	1	3	156	17.5	5.39
G3I710	AP-2 complex subunit alpha-1 OS=Cricetulus griseus GN=I79_019291 PE=4 SV=1 - [G3I710_CRIGR]	51.91	0.0338	1	2	3	3	946	104.6	7.66
G3HAV4	Vacuolar protein sorting-associated protein VTA1-like OS=Cricetulus griseus GN=I79_007563 PE=4 SV=1 - [G3HAV4_CRIGR]	20.45	0.0784	1	2	2	3	306	33.8	6.13
G3HV49	UPF0160 protein MYG1, mitochondrial OS=Cricetulus griseus GN=I79_014826 PE=4 SV=1 - [G3HV49_CRIGR]	84.95	0.0315	1	1	1	3	381	42.9	6.64
G3HXY1	PDZ and LIM domain protein 1 OS=Cricetulus griseus GN=I79_015897 PE=4 SV=1 - [G3HXY1_CRIGR]	39.4	0.0942	2	2	2	3	329	35.9	7.06
G3I059	UBX domain-containing protein 1 OS=Cricetulus griseus GN=I79_016735 PE=4 SV=1 - [G3I059_CRIGR]	68.31	0.0751	1	1	1	3	213	23.2	4.59
G3IH96	Eukaryotic translation initiation factor 4B OS=Cricetulus griseus GN=I79_023184 PE=4 SV=1 - [G3IH96_CRIGR]	38.49	0.1315	1	3	3	3	616	69.5	5.81
G3HQB7	Small nuclear ribonucleoprotein E OS=Cricetulus griseus GN=I79_013014 PE=4 SV=1 - [G3HQB7_CRIGR]	59.05	0.3913	2	2	2	2	92	10.8	9.44
Q3ZCA2	Cleavage and polyadenylation specificity factor subunit 5 OS=Bos taurus GN=NUDT21 PE=2 SV=1 - [CPSF5_BOVIN]	34.87	0.0396	1	1	1	2	227	26.2	8.82
G3GX44	Protein SEC13-like OS=Cricetulus griseus GN=I79_002356 PE=4 SV=1 - [G3GX44_CRIGR]	63.34	0.1149	2	2	2	2	322	35.5	5.38
P15467	Ribonuclease 4 OS=Bos taurus GN=RNASE4 PE=1 SV=4 - [RNAS4_BOVIN]	79.03	0.0924	1	1	1	2	119	13.7	8.51
G3I5S7	Coatomer subunit delta OS=Cricetulus griseus GN=I79_018833 PE=4 SV=1 - [G3I5S7_CRIGR]	25.56	0.0235	2	1	1	2	511	57.2	6.21
Q2KJG2	Ubiquitin-fold modifier 1 OS=Bos taurus GN=UFM1 PE=3 SV=1 - [UFM1_BOVIN]	21.91	0.1765	1	1	1	2	85	9.2	9.31
Q08DP0	Phosphoglucomutase-1 OS=Bos taurus GN=PGM1 PE=2 SV=1 - [PGM1_BOVIN]	0	0.0196	1	1	1	2	562	61.6	6.81
G3GV30	Echinoderm microtubule-associated protein-like 4 (Fragment) OS=Cricetulus griseus GN=I79_001560 PE=4 SV=1 - [G3GV30_CRIGR]	53.32	0.0122	1	1	1	2	983	109.3	6.6
G3HVZ2	Protocadherin Fat 1 OS=Cricetulus griseus GN=I79_015138 PE=4 SV=1 - [G3HVZ2_CRIGR]	40.26	0.005	1	2	2	2	4589	506.4	4.97
G3HTV3	Tripartite motif-containing protein 47 OS=Cricetulus griseus GN=I79_014333 PE=4 SV=1 - [G3HTV3_CRIGR]	34.78	0.0833	1	2	2	2	336	37.2	4.94
G3HDM0	Neuropilin-2 OS=Cricetulus griseus GN=I79_008606 PE=4 SV=1 - [G3HDM0_CRIGR]	102.17	0.0341	1	2	2	2	909	102.2	5.53
G3HLD0	Lactoylglutathione lyase OS=Cricetulus griseus GN=I79_011518 PE=4 SV=1 - [G3HLD0_CRIGR]	17.32	0.0455	1	1	1	2	154	17.6	5.1
G3I3A8	Nuclear mitotic apparatus protein 1 OS=Cricetulus griseus GN=I79_017912 PE=4 SV=1 - [G3I3A8_CRIGR]	90.2	0.0046	1	1	1	2	3026	340	5.83
G3HCD3	Phosphoglycerate mutase family member 5 OS=Cricetulus griseus GN=I79_008141 PE=4 SV=1 - [G3HCD3_CRIGR]	0	0.0297	1	1	1	2	471	53.6	9.79
G3HPL6	BAT2 domain-containing protein 1 OS=Cricetulus griseus GN=I79_012731 PE=4 SV=1 - [G3HPL6_CRIGR]	20.3	0.0064	1	1	1	2	2018	223.6	9.17
G3HK43	Ribonucleases P/MRP protein subunit POP1 OS=Cricetulus griseus GN=I79_011059 PE=4 SV=1 - [G3HK43_CRIGR]	22.45	0.0184	1	1	1	2	381	41.7	8.76
G3HJA4	26S proteasome non-ATPase regulatory subunit 8 OS=Cricetulus griseus GN=I79_010746 PE=4 SV=1 - [G3HJA4_CRIGR]	51.09	0.0437	1	1	1	2	183	21.3	5.94
G3HPN1	L-aminoadipate-semialdehyde dehydrogenase-phosphopantetheinyl transferase OS=Cricetulus griseus GN=I79_012746 PE=4 SV=1 - [G3HPN1_CRIGR]	61.48	0.0244	1	1	1	2	328	37.6	8.51
G3HLP4	Eukaryotic translation initiation factor 4H OS=Cricetulus griseus GN=I79_011635 PE=4 SV=1 - [G3HLP4_CRIGR]	24.27	0.036	2	1	1	2	222	24.7	9.32
G3I0Q4	Platelet-activating factor acetylhydrolase IB subunit beta OS=Cricetulus griseus GN=I79_016943 PE=4 SV=1 - [G3I0Q4_CRIGR]	46.57	0.0652	2	1	1	2	138	15.1	7.46
G3HTU7	Integrin beta-4 OS=Cricetulus griseus GN=I79_014327 PE=4 SV=1 - [G3HTU7_CRIGR]	42.27	0.0123	1	1	1	2	650	71.1	5.96
G3I0F7	Alpha-N-acetylgalactosaminidase OS=Cricetulus griseus GN=I79_016839 PE=4 SV=1 - [G3I0F7_CRIGR]	30.83	0.0193	1	1	1	2	415	47.2	7.84
G3I3I0	AP-2 complex subunit alpha-2 OS=Cricetulus griseus GN=I79_017988 PE=4 SV=1 - [G3I3I0_CRIGR]	22.86	0.0181	2	1	2	2	938	103.9	6.93
G3H983	Kelch repeat and BTB domain-containing protein 5 OS=Cricetulus griseus GN=I79_006949 PE=4 SV=1 - [G3H983_CRIGR]	32.56	0.0145	1	1	1	2	621	69.3	5.14
G3H756	Glutaredoxin-1 OS=Cricetulus griseus GN=I79_006182 PE=4 SV=1 - [G3H756_CRIGR]	38.98	0.0755	1	1	1	2	106	11.9	8.62
G3H3H6	ADP-ribosylation factor-like protein 8A OS=Cricetulus griseus GN=I79_004823 PE=4 SV=1 - [G3H3H6_CRIGR]	38.74	0.0652	3	1	1	2	138	15.8	8.44
G3HZE3	Sialidase-1 OS=Cricetulus griseus GN=I79_016442 PE=4 SV=1 - [G3HZE3_CRIGR]	97.85	0.0281	2	1	1	2	356	39	5.53
G3HID1	Ras-related protein Rab-7a OS=Cricetulus griseus GN=I79_010391 PE=3 SV=1 - [G3HID1_CRIGR]	39.28	0.1304	2	2	2	2	207	23.5	6.7
G3HF50	Complement factor D (Fragment) OS=Cricetulus griseus GN=I79_009203 PE=3 SV=1 - [G3HF50_CRIGR]	34.54	0.0383	1	1	1	2	235	25.6	7.71
G3HQH1	Cold shock domain-containing protein E1 (Fragment) OS=Cricetulus griseus GN=I79_013072 PE=4 SV=1 - [G3HQH1_CRIGR]	23.28	0.0466	1	1	2	2	451	50.4	5.52
G3I3N5	V-type proton ATPase subunit C 1 OS=Cricetulus griseus GN=I79_018045 PE=4 SV=1 - [G3I3N5_CRIGR]	0	0.0262	2	1	1	2	382	43.9	7.46
G3H910	Mannosyl-oligosaccharide 1,2-alpha-mannosidase IB OS=Cricetulus griseus GN=I79_006871 PE=4 SV=1 - [G3H910_CRIGR]	41.97	0.0172	1	1	1	2	641	72.9	8.12
G3IL48	Protein transport protein Sec31A OS=Cricetulus griseus GN=I79_024610 PE=4 SV=1 - [G3IL48_CRIGR]	45.09	0.0078	1	1	1	2	1160	126.1	7.03
G3HSG3	Tenascin OS=Cricetulus griseus GN=I79_013794 PE=4 SV=1 - [G3HSG3_CRIGR]	65.63	0.0045	1	1	1	2	2202	241.1	4.89
G3H8N3	60S ribosomal protein L4 OS=Cricetulus griseus GN=I79_006739 PE=4 SV=1 - [G3H8N3_CRIGR]	67.8	0.042	1	1	1	2	286	32.2	10.4
G3HAR2	Copine-1 OS=Cricetulus griseus GN=I79_007520 PE=4 SV=1 - [G3HAR2_CRIGR]	22.14	0.0168	1	1	1	2	537	58.9	5.73
G3GWQ3	Adenosine kinase OS=Cricetulus griseus GN=I79_002182 PE=4 SV=1 - [G3GWQ3_CRIGR]	46.82	0.0803	1	2	2	2	361	40.2	6.55
G3HLX3	Alpha-N-acetylglucosaminidase OS=Cricetulus griseus GN=I79_011717 PE=4 SV=1 - [G3HLX3_CRIGR]	113.63	0.0176	1	1	1	2	740	83.4	6.74
G3I2I1	DNA replication licensing factor MCM4 OS=Cricetulus griseus GN=I79_017612 PE=3 SV=1 - [G3I2I1_CRIGR]	32.28	0.0104	1	1	1	2	862	96.5	7.09
G3HXT3	Protein kinase C and casein kinase substrate in neurons protein 2 OS=Cricetulus griseus GN=I79_015847 PE=4 SV=1 - [G3HXT3_CRIGR]	44.92	0.0423	1	1	1	2	260	29.5	4.59
G3GWT9	Putative aminopeptidase NPEPL1 OS=Cricetulus griseus GN=I79_002222 PE=4 SV=1 - [G3GWT9_CRIGR]	52.28	0.0282	1	1	1	2	425	45.1	5.94
G3HSQ5	mRNA cap guanine-N7 methyltransferase OS=Cricetulus griseus GN=I79_013899 PE=3 SV=1 - [G3HSQ5_CRIGR]	29.47	0.0269	1	1	1	2	446	51.4	6.48
G3I0H0	Peptidyl-prolyl cis-trans isomerase NIMA-interacting 4 OS=Cricetulus griseus GN=I79_016855 PE=4 SV=1 - [G3I0H0_CRIGR]	0	0.1429	2	1	1	2	77	8.6	9.13
G3I2N4	Lamina-associated polypeptide 2, isoforms alpha/zeta OS=Cricetulus griseus GN=I79_017678 PE=4 SV=1 - [G3I2N4_CRIGR]	42.93	0.0408	1	1	1	2	319	34.9	5.94
G3GZB2	Acid ceramidase OS=Cricetulus griseus GN=I79_003173 PE=4 SV=1 - [G3GZB2_CRIGR]	23.48	0.0253	2	1	1	2	395	44.7	7.9
Q2T9Y6	Glutamate--cysteine ligase regulatory subunit OS=Bos taurus GN=GCLM PE=2 SV=1 - [GSH0_BOVIN]	48.91	0.1058	1	2	2	2	274	30.5	6.3
G3ILM1	Cysteine-rich protein 1 OS=Cricetulus griseus GN=I79_024790 PE=4 SV=1 - [G3ILM1_CRIGR]	51.7	0.1688	1	1	1	2	77	8.7	9.58
G3I531	Ran GTPase-activating protein 1 OS=Cricetulus griseus GN=I79_018572 PE=4 SV=1 - [G3I531_CRIGR]	37.8	0.0205	1	1	1	2	586	63.1	4.7
G3HSM4	Small glutamine-rich tetratricopeptide repeat-containing protein alpha OS=Cricetulus griseus GN=I79_013858 PE=4 SV=1 - [G3HSM4_CRIGR]	55.91	0.0414	1	1	1	2	314	34.1	5
G3HJN4	Vacuolar-sorting protein SNF8 OS=Cricetulus griseus GN=I79_010882 PE=4 SV=1 - [G3HJN4_CRIGR]	76.47	0.0543	1	1	1	2	258	28.9	6.65
G3I000	Aldehyde dehydrogenase family 16 member A1 OS=Cricetulus griseus GN=I79_016665 PE=4 SV=1 - [G3I000_CRIGR]	49.79	0.0362	1	2	2	2	802	85.2	6.86
G3HW70	APOBEC1 complementation factor OS=Cricetulus griseus GN=I79_015221 PE=4 SV=1 - [G3HW70_CRIGR]	45.94	0.013	1	1	1	2	1001	103	4.3
G3I6H3	Splicing factor 1 OS=Cricetulus griseus GN=I79_019082 PE=4 SV=1 - [G3I6H3_CRIGR]	38.63	0.0709	1	2	2	2	522	56.7	9.23
G3GX68	Nuclear protein localization protein 4-like OS=Cricetulus griseus GN=I79_002383 PE=4 SV=1 - [G3GX68_CRIGR]	35.81	0.0645	1	1	1	2	217	24.3	4.73
G3I973	Hypoxia up-regulated protein 1 OS=Cricetulus griseus GN=I79_020107 PE=3 SV=1 - [G3I973_CRIGR]	40.06	0.034	1	2	2	2	999	111.4	5.17
G3HP64	Sequestosome-1 OS=Cricetulus griseus GN=I79_012570 PE=4 SV=1 - [G3HP64_CRIGR]	31.52	0.0447	1	1	1	2	358	38.9	5.19
A2VDL4	Neutral amino acid transporter A OS=Bos taurus GN=SLC1A4 PE=2 SV=1 - [SATT_BOVIN]	45.02	0.0283	1	1	1	2	530	56	6.25
G3IKH4	Collagen alpha-2(V) chain OS=Cricetulus griseus GN=I79_024377 PE=4 SV=1 - [G3IKH4_CRIGR]	35.76	0.0203	1	1	1	2	935	87.1	6.2
G3IGW8	AN1-type zinc finger protein 5 OS=Cricetulus griseus GN=I79_023045 PE=4 SV=1 - [G3IGW8_CRIGR]	96.21	0.0845	1	1	1	2	213	23.1	8.51
G3H750	Calpastatin OS=Cricetulus griseus GN=I79_006176 PE=4 SV=1 - [G3H750_CRIGR]	50.1	0.0219	1	1	1	2	776	83.9	5.39
G3HWL6	Zinc transporter ZIP4 OS=Cricetulus griseus GN=I79_015348 PE=4 SV=1 - [G3HWL6_CRIGR]	105.75	0.0266	1	1	1	2	640	68.8	5.55
G3HIL4	Anamorsin OS=Cricetulus griseus GN=Ciapin1 PE=3 SV=1 - [G3HIL4_CRIGR]	25.11	0.055	1	1	1	2	309	33.3	5.12
G3HWY2	Exostosin-2 OS=Cricetulus griseus GN=I79_015497 PE=4 SV=1 - [G3HWY2_CRIGR]	58.47	0.0243	1	1	1	2	701	80.1	6.55
G3H3J2	Ladinin-1 (Fragment) OS=Cricetulus griseus GN=I79_004840 PE=4 SV=1 - [G3H3J2_CRIGR]	34.19	0.0343	1	1	1	2	554	61.3	9.7
Q3T186	Ribose-5-phosphate isomerase (Fragment) OS=Bos taurus GN=RPIA PE=2 SV=2 - [RPIA_BOVIN]	21.43	0.072	1	1	1	2	264	28.7	7.46
Q56JZ5	Eukaryotic translation initiation factor 3 subunit H OS=Bos taurus GN=EIF3H PE=2 SV=1 - [EIF3H_BOVIN]	25.96	0.0483	1	1	1	2	352	39.9	6.67
G3IAC8	Receptor-type tyrosine-protein phosphatase kappa OS=Cricetulus griseus GN=I79_020548 PE=4 SV=1 - [G3IAC8_CRIGR]	32.89	0.049	1	2	2	2	858	96.2	6.83
G3HSP7	Ester hydrolase C11orf54-like OS=Cricetulus griseus GN=I79_013881 PE=4 SV=1 - [G3HSP7_CRIGR]	47.57	0.085	1	1	1	2	247	27.6	7.08
G3H6J1	Mitogen-activated protein kinase kinase kinase kinase 4 OS=Cricetulus griseus GN=I79_005953 PE=4 SV=1 - [G3H6J1_CRIGR]	21.77	0.0302	1	1	1	2	1094	125.8	7.01
G3IBF6	Sister chromatid cohesion protein PDS5-like A OS=Cricetulus griseus GN=I79_020976 PE=4 SV=1 - [G3IBF6_CRIGR]	0	0.0158	1	1	1	2	1138	128	8.12
G3HLK3	Granulins OS=Cricetulus griseus GN=I79_011593 PE=4 SV=1 - [G3HLK3_CRIGR]	14.99	0.022	1	1	1	2	592	63.9	6.43
G3GZF3	Alpha-1,6-mannosylglycoprotein 6-beta-N-acetylglucosaminyltransferase A OS=Cricetulus griseus GN=I79_003217 PE=4 SV=1 - [G3GZF3_CRIGR]	28.29	0.0257	1	2	2	2	740	84.5	8.25
G3H307	Cingulin OS=Cricetulus griseus GN=I79_004612 PE=4 SV=1 - [G3H307_CRIGR]	21.7	0.0274	1	1	1	2	328	38.2	5.19
G3GSJ8	Disks large-like 1 OS=Cricetulus griseus GN=I79_000613 PE=4 SV=1 - [G3GSJ8_CRIGR]	17.36	0.0065	1	1	1	2	1536	169.1	6.24
G3H037	U5 small nuclear ribonucleoprotein 200 kDa helicase OS=Cricetulus griseus GN=I79_003485 PE=4 SV=1 - [G3H037_CRIGR]	63.37	0.0065	1	1	1	2	1377	158.1	5.97
G3I595	Histidyl-tRNA synthetase, cytoplasmic OS=Cricetulus griseus GN=I79_018639 PE=4 SV=1 - [G3I595_CRIGR]	62.07	0.0769	1	1	2	2	364	40.7	5.08
G3H277	Tyrosine-protein phosphatase non-receptor type 11 OS=Cricetulus griseus GN=I79_004244 PE=4 SV=1 - [G3H277_CRIGR]	27.8	0.0377	1	2	2	2	583	66.5	7.42
G3HGV7	tRNA-splicing ligase RtcB homolog OS=Cricetulus griseus GN=Rtcb PE=3 SV=1 - [G3HGV7_CRIGR]	24.08	0.025	2	1	1	2	440	47.8	7.08
G3IM40	26S proteasome non-ATPase regulatory subunit 1 OS=Cricetulus griseus GN=I79_024971 PE=4 SV=1 - [G3IM40_CRIGR]	43.05	0.0594	1	2	2	2	539	59.6	5.22
G3GWB1	Hepatocyte growth factor activator OS=Cricetulus griseus GN=I79_002031 PE=3 SV=1 - [G3GWB1_CRIGR]	98.84	0.0243	1	1	1	2	658	70.9	7.4
G3HJB6	Ras and Rab interactor-like protein OS=Cricetulus griseus GN=I79_010758 PE=4 SV=1 - [G3HJB6_CRIGR]	22.68	0.0645	1	2	2	2	651	71.7	5.12
G3HCF8	Endophilin-A2 OS=Cricetulus griseus GN=I79_008168 PE=4 SV=1 - [G3HCF8_CRIGR]	34.96	0.087	1	2	2	2	368	41.4	5.72
G3HU11	Nitrilase-like 1 OS=Cricetulus griseus GN=I79_014379 PE=4 SV=1 - [G3HU11_CRIGR]	22.93	0.0822	2	2	2	2	292	32.1	6.27
G3GY31	Cleavage and polyadenylation specificity factor subunit 6 OS=Cricetulus griseus GN=I79_002686 PE=4 SV=1 - [G3GY31_CRIGR]	41.73	0.05	2	1	1	2	500	53.6	9.74
A5PJI5	ATPase ASNA1 OS=Bos taurus GN=ASNA1 PE=2 SV=1 - [ASNA_BOVIN]	0	0.0287	1	1	1	1	348	38.8	4.91
G3H7Y4	Astrocytic phosphoprotein PEA-15 OS=Cricetulus griseus GN=I79_006480 PE=4 SV=1 - [G3H7Y4_CRIGR]	28.75	0.0923	1	1	1	1	130	15	5.02
G3I4N5	Gamma-aminobutyric acid receptor-associated protein-like 2 OS=Cricetulus griseus GN=I79_018418 PE=3 SV=1 - [G3I4N5_CRIGR]	23.57	0.0684	1	1	1	1	117	13.7	8.1
G3IMU0	ADP-ribosylation factor 6 OS=Cricetulus griseus GN=I79_025237 PE=3 SV=1 - [G3IMU0_CRIGR]	20.31	0.1143	1	1	1	1	175	20.1	8.95
Q2HJH0	U6 snRNA-associated Sm-like protein LSm5 OS=Bos taurus GN=LSM5 PE=3 SV=3 - [LSM5_BOVIN]	38.3	0.2088	1	1	1	1	91	9.9	4.54
Q0VCF9	Protein LSM12 homolog OS=Bos taurus GN=LSM12 PE=2 SV=2 - [LSM12_BOVIN]	0	0.0667	1	1	1	1	195	21.7	7.74
G3HE04	Splicing factor 3A subunit 3 OS=Cricetulus griseus GN=I79_008773 PE=4 SV=1 - [G3HE04_CRIGR]	33.36	0.024	1	1	1	1	501	58.8	5.34
O46375	Transthyretin OS=Bos taurus GN=TTR PE=1 SV=1 - [TTHY_BOVIN]	33.49	0.1565	1	1	1	1	147	15.7	6.3
Q5EAB6	Protein O-linked-mannose beta-1,2-N-acetylglucosaminyltransferase 1 OS=Bos taurus GN=POMGNT1 PE=2 SV=1 - [PMGT1_BOVIN]	0	0.0106	1	1	1	1	660	75	6.71
Q0VCA3	LETM1 and EF-hand domain-containing protein 1, mitochondrial OS=Bos taurus GN=LETM1 PE=2 SV=1 - [LETM1_BOVIN]	38.17	0.0082	2	1	1	1	732	81.8	6.73
G3HLY6	Vacuolar protein-sorting-associated protein 25 OS=Cricetulus griseus GN=I79_011730 PE=4 SV=1 - [G3HLY6_CRIGR]	20.98	0.0455	1	1	1	1	176	20.7	6.34
Q03247	Apolipoprotein E OS=Bos taurus GN=APOE PE=2 SV=1 - [APOE_BOVIN]	42.15	0.0443	1	1	1	1	316	36	5.67
Q2KIA5	Dynamin-1-like protein OS=Bos taurus GN=DNM1L PE=2 SV=1 - [DNM1L_BOVIN]	34.4	0.0134	1	1	1	1	749	83.3	7.08
Q05443	Lumican OS=Bos taurus GN=LUM PE=1 SV=1 - [LUM_BOVIN]	44.39	0.0234	1	1	1	1	342	38.7	6.35
Q3T149	Heat shock protein beta-1 OS=Bos taurus GN=HSPB1 PE=2 SV=1 - [HSPB1_BOVIN]	31.8	0.0498	1	1	1	1	201	22.4	6.4
P00829	ATP synthase subunit beta, mitochondrial OS=Bos taurus GN=ATP5B PE=1 SV=2 - [ATPB_BOVIN]	24.39	0.0227	2	1	1	1	528	56.2	5.27
Q0VCZ3	YTH domain-containing family protein 2 OS=Bos taurus GN=YTHDF2 PE=2 SV=1 - [YTHD2_BOVIN]	0	0.0155	1	1	1	1	580	62.4	8.79
Q2TBW8	60S ribosomal protein L10-like OS=Bos taurus GN=RPL10L PE=2 SV=1 - [RL10L_BOVIN]	25.6	0.028	3	1	1	1	214	24.6	10.18
Q2TBW7	Sorting nexin-2 OS=Bos taurus GN=SNX2 PE=2 SV=1 - [SNX2_BOVIN]	0	0.0193	1	1	1	1	519	58.4	5.12
Q3ZBG5	BAG family molecular chaperone regulator 2 OS=Bos taurus PE=2 SV=1 - [BAG2_BOVIN]	37.54	0.0521	1	1	1	1	211	23.6	6.57
A1A4P5	Prefoldin subunit 2 OS=Bos taurus GN=PFDN2 PE=2 SV=1 - [PFD2_BOVIN]	33.37	0.0909	1	1	1	1	154	16.6	6.58
P79126	Protein phosphatase 1G OS=Bos taurus GN=PPM1G PE=2 SV=2 - [PPM1G_BOVIN]	40.54	0.0258	1	1	1	1	543	58.6	4.36
P21758-2	Isoform II of Macrophage scavenger receptor types I and II OS=Bos taurus GN=MSR1 - [MSRE_BOVIN]	0	0.0287	2	1	1	1	349	38.4	5.4
G3HMV7	Tissue alpha-L-fucosidase OS=Cricetulus griseus GN=I79_012074 PE=4 SV=1 - [G3HMV7_CRIGR]	75.59	0.0238	1	1	1	1	462	53.3	6.48
G3IAH6	DNA-directed RNA polymerase OS=Cricetulus griseus GN=I79_020604 PE=3 SV=1 - [G3IAH6_CRIGR]	27.39	0.0112	1	1	1	1	980	111.1	6.35
G3I358	A-kinase anchor protein 13 OS=Cricetulus griseus GN=I79_017859 PE=4 SV=1 - [G3I358_CRIGR]	0	0.0026	1	1	1	1	2703	295.6	5.31
G3HII3	Centrosomal protein of 290 kDa OS=Cricetulus griseus GN=I79_010454 PE=4 SV=1 - [G3HII3_CRIGR]	0	0.0055	1	1	1	1	2172	253.7	6.42
G3GXD5	COP9 signalosome complex subunit 1 OS=Cricetulus griseus GN=I79_002425 PE=4 SV=1 - [G3GXD5_CRIGR]	18.54	0.0337	1	1	1	1	475	53.9	7.02
G3H761	Tetratricopeptide repeat protein 37 OS=Cricetulus griseus GN=I79_006187 PE=4 SV=1 - [G3H761_CRIGR]	23.04	0.0064	1	1	1	1	1563	174.2	6.8
G3ID84	Liprin-beta-2 OS=Cricetulus griseus GN=I79_021657 PE=4 SV=1 - [G3ID84_CRIGR]	0	0.0135	1	1	1	1	891	99.2	6.44
G3HZM6	Transcriptional repressor CTCF OS=Cricetulus griseus GN=I79_016533 PE=4 SV=1 - [G3HZM6_CRIGR]	28.9	0.0245	1	1	1	1	734	83.5	6.9
G3H8D2	Semaphorin-3F OS=Cricetulus griseus GN=I79_006632 PE=4 SV=1 - [G3H8D2_CRIGR]	32.32	0.0191	1	1	1	1	785	88.2	8.19
Q08D99	Transmembrane protein 41A OS=Bos taurus GN=TMEM41A PE=2 SV=1 - [TM41A_BOVIN]	0	0.0227	2	1	1	1	264	29.6	8.91
G3H2E4	Collagen alpha-1(XXIII) chain OS=Cricetulus griseus GN=I79_004354 PE=4 SV=1 - [G3H2E4_CRIGR]	0	0.05	2	1	1	1	120	11.6	5.48
G3HRS6	SECIS-binding protein 2-like OS=Cricetulus griseus GN=I79_013548 PE=4 SV=1 - [G3HRS6_CRIGR]	21.11	0.0077	1	1	1	1	1291	144.1	5.67
G3H4A9	Mpv17-like protein 2 OS=Cricetulus griseus GN=I79_005109 PE=4 SV=1 - [G3H4A9_CRIGR]	43.92	0.0234	1	1	1	1	471	52.4	8.24
G3HZ57	Neuropilin-1 OS=Cricetulus griseus GN=I79_016352 PE=4 SV=1 - [G3HZ57_CRIGR]	27.41	0.0152	1	1	1	1	923	103	5.94
G3I653	TSC22 domain family protein 4 OS=Cricetulus griseus GN=I79_018965 PE=4 SV=1 - [G3I653_CRIGR]	0	0.0155	3	1	1	1	387	39.8	6.83
G3H4B2	Microtubule-associated serine/threonine-protein kinase 3 OS=Cricetulus griseus GN=I79_005112 PE=4 SV=1 - [G3H4B2_CRIGR]	0	0.0073	1	1	1	1	824	88.5	8.06
G3HRA7	Engulfment and cell motility protein 1 OS=Cricetulus griseus GN=I79_013372 PE=4 SV=1 - [G3HRA7_CRIGR]	31.79	0.0096	1	1	1	1	727	83.9	6.28
G3HK57	Cullin-4A OS=Cricetulus griseus GN=I79_011074 PE=3 SV=1 - [G3HK57_CRIGR]	0	0.0137	1	1	1	1	582	67.5	8.09
G3GU75	Translational activator GCN1 OS=Cricetulus griseus GN=I79_001227 PE=4 SV=1 - [G3GU75_CRIGR]	42.97	0.004	1	1	1	1	2738	300.6	7.23
G3HB45	60S ribosomal protein L21 OS=Cricetulus griseus GN=I79_007660 PE=4 SV=1 - [G3HB45_CRIGR]	0	0.0551	5	1	1	1	127	14.9	10.43
G3IFW5	ADP-ribosyl cyclase 2 OS=Cricetulus griseus GN=I79_022639 PE=4 SV=1 - [G3IFW5_CRIGR]	23.36	0.0268	2	1	1	1	261	29.2	7.58
G3HMG5	GA-binding protein alpha chain OS=Cricetulus griseus GN=I79_011929 PE=3 SV=1 - [G3HMG5_CRIGR]	25.86	0.0123	1	1	1	1	651	73.4	5.82
G3HMP0	Protein TFG OS=Cricetulus griseus GN=I79_012009 PE=4 SV=1 - [G3HMP0_CRIGR]	29.33	0.1389	1	1	1	1	72	8.4	7.25
G3H8Q6	Importin subunit alpha OS=Cricetulus griseus GN=I79_006766 PE=3 SV=1 - [G3H8Q6_CRIGR]	33	0.0181	1	1	1	1	497	55	4.83
G3HR59	Tubulin-specific chaperone C OS=Cricetulus griseus GN=I79_013322 PE=4 SV=1 - [G3HR59_CRIGR]	24.73	0.0336	2	1	1	1	238	26.4	5.57
Q58DN4	Protein phosphatase methylesterase 1 OS=Bos taurus GN=PPME1 PE=2 SV=3 - [PPME1_BOVIN]	0	0.0316	1	1	1	1	380	41.7	5.97
G3HCH1	Dipeptidyl peptidase 9 OS=Cricetulus griseus GN=I79_008181 PE=4 SV=1 - [G3HCH1_CRIGR]	28.26	0.0102	1	1	1	1	787	89.7	6.4
G3GRX2	Ubiquitin carboxyl-terminal hydrolase OS=Cricetulus griseus GN=I79_000267 PE=3 SV=1 - [G3GRX2_CRIGR]	23.85	0.0117	1	1	1	1	772	84.8	5.49
G3HDB3	Splicing factor, arginine/serine-rich 6 OS=Cricetulus griseus GN=I79_008493 PE=4 SV=1 - [G3HDB3_CRIGR]	20.34	0.0429	2	1	1	1	210	24.1	12.12
G3I7U8	Lysyl oxidase-like 3 OS=Cricetulus griseus GN=I79_019597 PE=4 SV=1 - [G3I7U8_CRIGR]	21.07	0.0113	1	1	1	1	797	88	7.17
G3HFR3	Transmembrane emp24 domain-containing protein 10 OS=Cricetulus griseus GN=I79_009427 PE=4 SV=1 - [G3HFR3_CRIGR]	20.53	0.0692	2	1	1	1	130	15.1	9.72
Q8MJJ7	m7GpppX diphosphatase OS=Bos taurus GN=DCPS PE=2 SV=1 - [DCPS_BOVIN]	21.61	0.0297	2	1	1	1	337	38.4	6.21
G3I2P8	Annexin OS=Cricetulus griseus GN=I79_017691 PE=3 SV=1 - [G3I2P8_CRIGR]	46.58	0.0356	2	1	1	1	253	27.5	5.43
G3ILK7	Calsyntenin-1 OS=Cricetulus griseus GN=I79_024775 PE=4 SV=1 - [G3ILK7_CRIGR]	18.28	0.0132	1	1	1	1	832	92.2	4.81
G3IP86	Replication protein A 70 kDa DNA-binding subunit OS=Cricetulus griseus GN=I79_025790 PE=4 SV=1 - [G3IP86_CRIGR]	24.19	0.0478	1	1	1	1	209	23.2	6.58
G3GX46	Transporter OS=Cricetulus griseus GN=I79_002358 PE=3 SV=1 - [G3GX46_CRIGR]	31.17	0.016	3	1	1	1	561	62.9	6.86
G3IGM2	Sorting nexin-27 OS=Cricetulus griseus GN=I79_022940 PE=4 SV=1 - [G3IGM2_CRIGR]	20.27	0.0431	2	1	1	1	232	27.8	6.52
G3HFY1	Protein phosphatase 1F OS=Cricetulus griseus GN=I79_009498 PE=3 SV=1 - [G3HFY1_CRIGR]	0	0.0246	1	1	1	1	448	49.6	5.24
G3H1K6	Disintegrin and metalloproteinase domain-containing protein 9 OS=Cricetulus griseus GN=I79_004035 PE=4 SV=1 - [G3H1K6_CRIGR]	31.87	0.0117	1	1	1	1	1196	131.7	5.94
G3HFG7	Putative hydroxypyruvate isomerase OS=Cricetulus griseus GN=I79_009307 PE=4 SV=1 - [G3HFG7_CRIGR]	22.57	0.0647	1	1	1	1	170	19	4.91
G3GWG7	High affinity cationic amino acid transporter 1 OS=Cricetulus griseus GN=I79_002091 PE=4 SV=1 - [G3GWG7_CRIGR]	50.4	0.0175	1	1	1	1	628	67.6	6.73
Q0II64	SUN domain-containing protein 3 OS=Bos taurus GN=SUN3 PE=2 SV=2 - [SUN3_BOVIN]	28.31	0.0278	1	1	1	1	360	40.6	7.56
G3GVV3	Putative uncharacterized protein OS=Cricetulus griseus GN=I79_001856 PE=4 SV=1 - [G3GVV3_CRIGR]	20.39	0.088	1	1	1	1	125	14.2	5.55
G3IN68	CD2 antigen cytoplasmic tail-binding protein 2 OS=Cricetulus griseus GN=I79_025380 PE=4 SV=1 - [G3IN68_CRIGR]	34.47	0.0411	1	1	1	1	341	37.5	4.61
G3HKF3	Ankycorbin OS=Cricetulus griseus GN=I79_011173 PE=4 SV=1 - [G3HKF3_CRIGR]	30.77	0.0105	1	1	1	1	949	105.8	5.88
G3GWX3	GDP-mannose 4,6 dehydratase OS=Cricetulus griseus GN=I79_002258 PE=4 SV=1 - [G3GWX3_CRIGR]	52.49	0.0965	1	1	1	1	114	13.3	5.31
G3IC07	Huntingtin-interacting protein 1-related protein OS=Cricetulus griseus GN=I79_021194 PE=4 SV=1 - [G3IC07_CRIGR]	24.53	0.0257	1	1	1	1	505	55.2	5.36
G3IAB9	Eukaryotic translation initiation factor 4E OS=Cricetulus griseus GN=I79_020539 PE=3 SV=1 - [G3IAB9_CRIGR]	38.41	0.094	3	1	1	1	117	13.4	8.29
G3HGQ1	Cation-independent mannose-6-phosphate receptor OS=Cricetulus griseus GN=I79_009791 PE=4 SV=1 - [G3HGQ1_CRIGR]	29.98	0.0071	2	1	1	1	1700	186.5	5.41
G3I7J6	Non-POU domain-containing octamer-binding protein OS=Cricetulus griseus GN=I79_019488 PE=4 SV=1 - [G3I7J6_CRIGR]	24.28	0.0179	1	1	1	1	613	69.6	5.2
G3HHX0	Interleukin-6 receptor subunit beta OS=Cricetulus griseus GN=I79_010231 PE=4 SV=1 - [G3HHX0_CRIGR]	27.68	0.0131	1	1	1	1	914	102.5	5.47
G3HU08	Poliovirus receptor-related protein 4 OS=Cricetulus griseus GN=I79_014376 PE=4 SV=1 - [G3HU08_CRIGR]	33.65	0.0298	1	1	1	1	436	48	5.29
G3H5A7	Tight junction protein ZO-1 OS=Cricetulus griseus GN=I79_005485 PE=4 SV=1 - [G3H5A7_CRIGR]	16.02	0.0184	1	1	1	1	762	86	6.54
G3HVG9	Matrin-3 OS=Cricetulus griseus GN=I79_014957 PE=4 SV=1 - [G3HVG9_CRIGR]	41.86	0.0153	1	1	1	1	847	94.6	6.25
G3HPR6	Tubulin-folding cofactor B OS=Cricetulus griseus GN=I79_012784 PE=4 SV=1 - [G3HPR6_CRIGR]	45.17	0.0829	1	1	1	1	193	21.7	4.88
G3HSX7	Plasma membrane calcium-transporting ATPase 3 OS=Cricetulus griseus GN=I79_013976 PE=3 SV=1 - [G3HSX7_CRIGR]	81.45	0.0144	3	1	1	1	1183	130.5	5.66
G3ICH8	Protein Wnt OS=Cricetulus griseus GN=I79_021376 PE=3 SV=1 - [G3ICH8_CRIGR]	27.86	0.0425	1	1	1	1	353	39.3	8.66
G3H156	Prefoldin subunit 4 OS=Cricetulus griseus GN=I79_003880 PE=3 SV=1 - [G3H156_CRIGR]	46.02	0.1128	2	1	1	1	133	15.2	4.73
G3IG96	Glutamate--cysteine ligase regulatory subunit OS=Cricetulus griseus GN=I79_022778 PE=4 SV=1 - [G3IG96_CRIGR]	53.77	0.0667	1	1	1	1	225	25.5	5.12
Q29RK1	Citrate synthase, mitochondrial OS=Bos taurus GN=CS PE=1 SV=1 - [CISY_BOVIN]	73.74	0.0343	1	1	1	1	466	51.7	8.12
G3HM98	Drebrin-like protein OS=Cricetulus griseus GN=I79_011849 PE=4 SV=1 - [G3HM98_CRIGR]	29.25	0.037	1	1	1	1	433	48.5	4.89
G3HDE3	Proteasome activator complex subunit 2 OS=Cricetulus griseus GN=I79_008547 PE=4 SV=1 - [G3HDE3_CRIGR]	32.81	0.0669	1	1	1	1	239	27.2	5.76
G3IFB0	Serine/arginine repetitive matrix protein 2 OS=Cricetulus griseus GN=I79_022432 PE=4 SV=1 - [G3IFB0_CRIGR]	33.88	0.0075	1	1	1	1	2791	303.7	11.96
G3I151	Transcobalamin-2 OS=Cricetulus griseus GN=I79_017097 PE=4 SV=1 - [G3I151_CRIGR]	29.75	0.046	1	1	1	1	391	43.5	6.98
G3GUB2	Cytoplasmic dynein 1 intermediate chain 2 (Fragment) OS=Cricetulus griseus GN=I79_001266 PE=4 SV=1 - [G3GUB2_CRIGR]	26.94	0.044	1	1	1	1	432	48.7	4.88
G3H951	Importin subunit alpha OS=Cricetulus griseus GN=I79_006913 PE=3 SV=1 - [G3H951_CRIGR]	37.57	0.0336	2	1	1	1	536	59.9	4.94
G3I5W2	TAR DNA-binding protein 43 OS=Cricetulus griseus GN=I79_018870 PE=4 SV=1 - [G3I5W2_CRIGR]	27.56	0.1206	1	1	1	1	199	22.6	7.24
G3IGP3	Heparan sulfate glucosamine 3-O-sulfotransferase 1 OS=Cricetulus griseus GN=I79_022963 PE=4 SV=1 - [G3IGP3_CRIGR]	24.93	0.0225	1	1	1	1	311	35.9	9.11
G3H7T9	E3 ubiquitin-protein ligase HUWE1 (Fragment) OS=Cricetulus griseus GN=I79_006430 PE=4 SV=1 - [G3H7T9_CRIGR]	0	0.0026	1	1	1	1	4178	460.4	5.2
G3II52	Oxysterol-binding protein (Fragment) OS=Cricetulus griseus GN=I79_023514 PE=3 SV=1 - [G3II52_CRIGR]	0	0.0122	1	1	1	1	736	84	7.02
G3HYU6	DNA-directed RNA polymerases I and III subunit RPAC1 OS=Cricetulus griseus GN=I79_016238 PE=4 SV=1 - [G3HYU6_CRIGR]	13.88	0.039	1	1	1	1	282	31.7	5.87
G3HYR4	NEDD4-binding protein 1 OS=Cricetulus griseus GN=I79_016205 PE=4 SV=1 - [G3HYR4_CRIGR]	29.77	0.0123	1	1	1	1	811	90.4	5.73
G3I2Z3	A-kinase anchor protein 9 (Fragment) OS=Cricetulus griseus GN=I79_017791 PE=4 SV=1 - [G3I2Z3_CRIGR]	0	0.0032	1	1	1	1	3428	395.1	5.05
P00366	Glutamate dehydrogenase 1, mitochondrial OS=Bos taurus GN=GLUD1 PE=1 SV=2 - [DHE3_BOVIN]	30.05	0.0143	1	1	1	1	558	61.5	7.59
G3HNU4	Chromodomain-helicase-DNA-binding protein 1 OS=Cricetulus griseus GN=I79_012438 PE=4 SV=1 - [G3HNU4_CRIGR]	0	0.0035	2	1	1	1	1710	196.4	7.28
Q2KJ53	Inositol monophosphatase 3 OS=Bos taurus GN=IMPAD1 PE=2 SV=1 - [IMPA3_BOVIN]	20.62	0.0166	1	1	1	1	362	38.9	6.8
G3IJW6	GRB2-associated-binding protein 2 (Fragment) OS=Cricetulus griseus GN=I79_024157 PE=4 SV=1 - [G3IJW6_CRIGR]	25.28	0.0435	2	1	1	1	161	18.1	5.31
G3H0N3	Envelope glycoprotein OS=Cricetulus griseus GN=I79_003697 PE=4 SV=1 - [G3H0N3_CRIGR]	27.58	0.0423	4	1	1	1	189	21.3	8.28
G3GXY1	Beta-catenin-like protein 1 OS=Cricetulus griseus GN=I79_002626 PE=4 SV=1 - [G3GXY1_CRIGR]	34.81	0.0142	2	1	1	1	563	65	5.05
G3I369	Golgi apparatus protein 1 OS=Cricetulus griseus GN=I79_017870 PE=4 SV=1 - [G3I369_CRIGR]	0	0.0227	1	1	1	1	308	35.1	8
G3H016	Putative uncharacterized protein OS=Cricetulus griseus GN=I79_003464 PE=4 SV=1 - [G3H016_CRIGR]	0	0.1061	1	1	1	1	66	7.2	8.98
G3H5P3	Cytoplasmic protein NCK2 OS=Cricetulus griseus GN=I79_005627 PE=4 SV=1 - [G3H5P3_CRIGR]	0	0.0211	2	1	1	1	380	42.8	6.95
G3HL12	Mps one binder kinase activator-like 3 OS=Cricetulus griseus GN=I79_011397 PE=4 SV=1 - [G3HL12_CRIGR]	31.4	0.0431	1	1	1	1	209	23.8	6.92
G3IGJ2	Collagen alpha-1(XVII) chain OS=Cricetulus griseus GN=I79_022909 PE=4 SV=1 - [G3IGJ2_CRIGR]	20.6	0.0608	1	1	1	1	181	18.1	9.36
G3GUK0	Putative fructose-2,6-bisphosphatase TIGAR OS=Cricetulus griseus GN=I79_001362 PE=4 SV=1 - [G3GUK0_CRIGR]	33.79	0.0414	1	1	1	1	266	29.2	6.67
A5PKH3	Fumarylacetoacetase OS=Bos taurus GN=FAH PE=2 SV=1 - [FAAA_BOVIN]	40.12	0.0286	1	1	1	1	419	46.1	6.98
G3I5Z8	Proteasome-associated protein ECM29-like OS=Cricetulus griseus GN=I79_018909 PE=4 SV=1 - [G3I5Z8_CRIGR]	33.9	0.0065	1	1	1	1	1839	203.7	7.31
G3HBE9	Leucine-rich repeat-containing protein 59 OS=Cricetulus griseus GN=I79_007777 PE=4 SV=1 - [G3HBE9_CRIGR]	24.91	0.0418	2	1	1	1	287	32.9	9.52
G3HH11	N-acylneuraminate cytidylyltransferase OS=Cricetulus griseus GN=I79_009906 PE=4 SV=1 - [G3HH11_CRIGR]	20.81	0.0436	1	1	1	1	275	31.3	6.96
G3IAN6	Protein fucU-like OS=Cricetulus griseus GN=I79_020662 PE=4 SV=1 - [G3IAN6_CRIGR]	63.71	0.0755	1	1	1	1	159	17	5.82
G3HXT4	Protein kinase C and casein kinase substrate in neurons protein 2 OS=Cricetulus griseus GN=I79_015848 PE=4 SV=1 - [G3HXT4_CRIGR]	42.52	0.057	1	1	1	1	193	22.2	7.88
G3I5T6	Serine/threonine-protein phosphatase 5 OS=Cricetulus griseus GN=I79_018843 PE=4 SV=1 - [G3I5T6_CRIGR]	35.5	0.0214	1	1	1	1	607	67.5	8.24
G3HCX7	Phenylalanyl-tRNA synthetase alpha chain OS=Cricetulus griseus GN=I79_008345 PE=3 SV=1 - [G3HCX7_CRIGR]	57.57	0.0276	1	1	1	1	508	57.7	7.93
G3GVS3	Glycylpeptide N-tetradecanoyltransferase OS=Cricetulus griseus GN=I79_001820 PE=3 SV=1 - [G3GVS3_CRIGR]	79.09	0.0848	5	1	1	1	165	19	5.72
G3HTK6	Tumor necrosis factor receptor superfamily member 27 OS=Cricetulus griseus GN=I79_014234 PE=4 SV=1 - [G3HTK6_CRIGR]	28.06	0.0471	1	1	1	1	297	32.8	5.16
G3I557	Toll-interacting protein OS=Cricetulus griseus GN=I79_018601 PE=4 SV=1 - [G3I557_CRIGR]	27.6	0.0511	1	1	1	1	274	30.3	5.3
G3I3G7	Epidermal growth factor receptor kinase substrate 8-like protein 2 (Fragment) OS=Cricetulus griseus GN=I79_017973 PE=4 SV=1 - [G3I3G7_CRIGR]	57.68	0.0235	1	1	1	1	680	76.7	7.93
G3GXY4	Regulation of nuclear pre-mRNA domain-containing protein 1B OS=Cricetulus griseus GN=I79_002629 PE=4 SV=1 - [G3GXY4_CRIGR]	39.26	0.046	1	1	1	1	326	36.9	5.97
G3HRY8	SWI/SNF-related matrix-associated actin-dependent regulator of chromatin subfamily A member 5 OS=Cricetulus griseus GN=I79_013613 PE=4 SV=1 - [G3HRY8_CRIGR]	31.21	0.0129	1	1	1	1	1166	134.1	6.74
G3HYW2	Malignant T cell amplified sequence 1 OS=Cricetulus griseus GN=I79_016254 PE=4 SV=1 - [G3HYW2_CRIGR]	26.66	0.1232	2	1	1	1	138	15.5	8.82
G3GUN6	COP9 signalosome complex subunit 7a OS=Cricetulus griseus GN=I79_001402 PE=4 SV=1 - [G3GUN6_CRIGR]	31.66	0.0582	1	1	1	1	275	30.3	8.22
G3IMZ0	Very low-density lipoprotein receptor OS=Cricetulus griseus GN=I79_025297 PE=4 SV=1 - [G3IMZ0_CRIGR]	32.25	0.0305	1	1	1	1	558	61.8	4.75
G3HND9	Putative RNA-binding protein 3 OS=Cricetulus griseus GN=I79_012278 PE=4 SV=1 - [G3HND9_CRIGR]	32.05	0.1065	1	1	1	1	169	18.1	9.07
G3HG78	Apolipoprotein A-I-binding protein OS=Cricetulus griseus GN=I79_009597 PE=4 SV=1 - [G3HG78_CRIGR]	20.17	0.078	1	1	1	1	205	22.4	7.33
G3HCX3	Deoxyribonuclease-2-alpha OS=Cricetulus griseus GN=I79_008341 PE=4 SV=1 - [G3HCX3_CRIGR]	31.72	0.0512	1	1	1	1	371	40.4	7.55
G3IAE3	UPF0568 protein C14orf166-like OS=Cricetulus griseus GN=I79_020563 PE=4 SV=1 - [G3IAE3_CRIGR]	27.17	0.1818	1	1	1	1	110	12.3	6.95
G3HMV3	Acyl-protein thioesterase 2 OS=Cricetulus griseus GN=I79_012070 PE=4 SV=1 - [G3HMV3_CRIGR]	55.64	0.4815	1	1	1	1	54	5.7	6.49
G3HVR3	PR domain zinc finger protein 1 OS=Cricetulus griseus GN=I79_015054 PE=4 SV=1 - [G3HVR3_CRIGR]	0	0.0097	1	1	1	1	825	91.8	8.44
G3H1S2	UDP-glucose:glycoprotein glucosyltransferase 1 OS=Cricetulus griseus GN=I79_004104 PE=4 SV=1 - [G3H1S2_CRIGR]	0	0.0113	1	1	1	1	1322	151.4	5.67
G3I2S9	G2/mitotic-specific cyclin-F OS=Cricetulus griseus GN=I79_017723 PE=3 SV=1 - [G3I2S9_CRIGR]	0	0.0057	1	1	1	1	1921	215.6	7.18

## Sheet: Sample 3
Accession	Description	Score	Coverage	# Proteins	# Unique Peptides	# Peptides	# PSMs	# AAs	MW [kDa]	calc. pI
P02769	Serum albumin OS=Bos taurus GN=ALB PE=1 SV=4 - [ALBU_BOVIN]	43142.6	0.8534	2	75	77	1872	607	69.2	6.18
Q29443	Serotransferrin OS=Bos taurus GN=TF PE=2 SV=1 - [TRFE_BOVIN]	16619.4	0.7869	5	60	64	688	704	77.7	7.08
P00760	Cationic trypsin OS=Bos taurus PE=1 SV=3 - [TRY1_BOVIN]	11798.5	0.7073	2	15	15	636	246	25.8	8.07
P12763	Alpha-2-HS-glycoprotein OS=Bos taurus GN=AHSG PE=1 SV=2 - [FETUA_BOVIN]	13962.7	0.546	1	18	18	578	359	38.4	5.5
Q7SIH1	Alpha-2-macroglobulin OS=Bos taurus GN=A2M PE=1 SV=2 - [A2MG_BOVIN]	10664.1	0.606	5	67	67	464	1510	167.5	6.02
P34955	Alpha-1-antiproteinase OS=Bos taurus GN=SERPINA1 PE=1 SV=1 - [A1AT_BOVIN]	9241.95	0.5	1	22	22	440	416	46.1	6.52
Q76LV1	Heat shock protein HSP 90-beta OS=Bos taurus GN=HSP90AB1 PE=2 SV=3 - [HS90B_BOVIN]	5832.7	0.5552	8	26	50	316	724	83.2	5.03
G3GVD0	Actin, cytoplasmic 1 OS=Cricetulus griseus GN=I79_001666 PE=3 SV=1 - [G3GVD0_CRIGR]	6016.59	0.72	4	1	24	272	375	41.7	5.48
P63258	Actin, cytoplasmic 2 OS=Bos taurus GN=ACTG1 PE=1 SV=1 - [ACTG_BOVIN]	5610.1	0.72	5	1	24	263	375	41.8	5.48
Q76LV2	Heat shock protein HSP 90-alpha OS=Bos taurus GN=HSP90AA1 PE=1 SV=3 - [HS90A_BOVIN]	4942.76	0.5512	8	20	47	261	733	84.7	5.01
P19120	Heat shock cognate 71 kDa protein OS=Bos taurus GN=HSPA8 PE=1 SV=2 - [HSP7C_BOVIN]	5868.12	0.4708	14	18	30	247	650	71.2	5.52
G3HSL4	Elongation factor 2 OS=Cricetulus griseus GN=I79_013848 PE=4 SV=1 - [G3HSL4_CRIGR]	5633.68	0.6422	2	5	44	237	872	96.6	6.83
Q9XSJ4	Alpha-enolase OS=Bos taurus GN=ENO1 PE=1 SV=4 - [ENOA_BOVIN]	6365.07	0.4793	9	7	22	225	434	47.3	6.8
Q3SYU2	Elongation factor 2 OS=Bos taurus GN=EEF2 PE=2 SV=3 - [EF2_BOVIN]	5214.32	0.5653	2	1	40	222	858	95.3	6.83
G3IBK2	Filamin-A OS=Cricetulus griseus GN=I79_021027 PE=4 SV=1 - [G3IBK2_CRIGR]	4047.89	0.3043	1	53	54	209	2488	263.5	5.82
G3I4H6	Fructose-bisphosphate aldolase OS=Cricetulus griseus GN=I79_018355 PE=3 SV=1 - [G3I4H6_CRIGR]	3614.94	0.6758	6	23	23	186	364	39.4	8.07
Q3SZR3	Alpha-1-acid glycoprotein OS=Bos taurus GN=ORM1 PE=2 SV=1 - [A1AG_BOVIN]	3847.11	0.5099	2	13	13	184	202	23.2	5.87
Q2UVX4	Complement C3 OS=Bos taurus GN=C3 PE=1 SV=2 - [CO3_BOVIN]	2926.01	0.3426	1	41	46	163	1661	187.1	6.84
G3H1K9	Alpha-actinin-1 OS=Cricetulus griseus GN=I79_004057 PE=4 SV=1 - [G3H1K9_CRIGR]	3586.44	0.4684	2	23	34	162	903	104.5	5.8
G3IAQ0	Alpha-enolase OS=Cricetulus griseus GN=I79_020676 PE=3 SV=1 - [G3IAQ0_CRIGR]	5198.01	0.4056	6	1	16	162	429	46.7	6.16
G3HFM4	Filamin-B OS=Cricetulus griseus GN=I79_009386 PE=4 SV=1 - [G3HFM4_CRIGR]	3351.55	0.2394	2	42	43	162	2602	277.7	5.73
A5D7D1	Alpha-actinin-4 OS=Bos taurus GN=ACTN4 PE=2 SV=1 - [ACTN4_BOVIN]	3186.79	0.4621	3	18	37	155	911	104.9	5.44
G3GSM5	Transferrin receptor protein 1 OS=Cricetulus griseus GN=I79_000642 PE=4 SV=1 - [G3GSM5_CRIGR]	3159.24	0.2827	1	22	22	152	757	85	6.77
G3IH98	Keratin, type II cytoskeletal 8 OS=Cricetulus griseus GN=I79_023186 PE=3 SV=1 - [G3IH98_CRIGR]	3400.89	0.4631	14	19	27	147	488	54.3	5.82
G3I8R9	78 kDa glucose-regulated protein OS=Cricetulus griseus GN=I79_019946 PE=1 SV=1 - [G3I8R9_CRIGR]	3157.8	0.4664	2	27	29	143	654	72.3	5.16
G3GY17	Cullin-associated NEDD8-dissociated protein 1 OS=Cricetulus griseus GN=I79_002670 PE=4 SV=1 - [G3GY17_CRIGR]	3045.8	0.3549	2	4	34	143	1206	133.5	5.74
A7MBJ5	Cullin-associated NEDD8-dissociated protein 1 OS=Bos taurus GN=CAND1 PE=2 SV=1 - [CAND1_BOVIN]	3060.75	0.3154	2	2	32	136	1230	136.3	5.78
G3H3Q1	Pyruvate kinase OS=Cricetulus griseus GN=I79_004880 PE=3 SV=1 - [G3H3Q1_CRIGR]	3274.39	0.4873	4	14	23	134	472	51.5	7.68
G3GR73	Rab GDP dissociation inhibitor beta OS=Cricetulus griseus GN=I79_000016 PE=4 SV=1 - [G3GR73_CRIGR]	2277.18	0.6315	1	13	27	134	445	50.5	6.25
P49951	Clathrin heavy chain 1 OS=Bos taurus GN=CLTC PE=1 SV=1 - [CLH1_BOVIN]	2802.66	0.3051	2	38	38	131	1675	191.5	5.69
G3HG95	Lamin-A/C OS=Cricetulus griseus GN=I79_009616 PE=3 SV=1 - [G3HG95_CRIGR]	3004.73	0.5204	1	32	32	130	563	64	8.02
Q3ZC09	Beta-enolase OS=Bos taurus GN=ENO3 PE=2 SV=1 - [ENOB_BOVIN]	4202.06	0.5253	3	11	19	128	434	47.1	7.72
P62261	14-3-3 protein epsilon OS=Bos taurus GN=YWHAE PE=2 SV=1 - [1433E_BOVIN]	2874.98	0.5608	3	13	16	127	255	29.2	4.74
G3GXD7	Fatty acid synthase OS=Cricetulus griseus GN=I79_002427 PE=4 SV=1 - [G3GXD7_CRIGR]	2239.17	0.129	2	29	29	123	2503	271.7	6.38
G3HGW6	Laminin subunit alpha-5 OS=Cricetulus griseus GN=I79_009858 PE=4 SV=1 - [G3HGW6_CRIGR]	2526.9	0.094	2	25	25	118	3735	405.6	6.9
G3HQP8	Tubulin beta-7 chain OS=Cricetulus griseus GN=I79_013153 PE=3 SV=1 - [G3HQP8_CRIGR]	3491.64	0.6396	2	3	21	117	444	49.6	4.89
P06868	Plasminogen OS=Bos taurus GN=PLG PE=1 SV=2 - [PLMN_BOVIN]	1863.25	0.447	1	28	28	117	812	91.2	7.5
G3IH63	Myosin-9 OS=Cricetulus griseus GN=I79_023145 PE=4 SV=1 - [G3IH63_CRIGR]	2202.17	0.2741	5	39	39	117	1948	225.7	5.58
G3IDL7	Heat shock cognate 71 kDa protein OS=Cricetulus griseus GN=I79_021800 PE=3 SV=1 - [G3IDL7_CRIGR]	2936.33	0.6316	6	1	13	114	209	22.7	5.44
Q3MHM5	Tubulin beta-4B chain OS=Bos taurus GN=TUBB4B PE=2 SV=1 - [TBB4B_BOVIN]	3621.58	0.6764	5	4	22	113	445	49.8	4.89
Q3MHN5	Vitamin D-binding protein OS=Bos taurus GN=GC PE=2 SV=1 - [VTDB_BOVIN]	2685	0.5781	2	24	24	113	474	53.3	5.52
G3GUU5	Transketolase OS=Cricetulus griseus GN=I79_001469 PE=3 SV=1 - [G3GUU5_CRIGR]	2348.73	0.4238	1	17	22	113	623	67.7	7.64
Q2HJ49	Moesin OS=Bos taurus GN=MSN PE=2 SV=3 - [MOES_BOVIN]	1679.85	0.3865	1	5	24	112	577	67.9	6.16
Q3ZBT1	Transitional endoplasmic reticulum ATPase OS=Bos taurus GN=VCP PE=2 SV=1 - [TERA_BOVIN]	2693	0.4727	3	27	27	112	806	89.3	5.26
Q2KJF1	Alpha-1B-glycoprotein OS=Bos taurus GN=A1BG PE=1 SV=1 - [A1BG_BOVIN]	2142.41	0.493	1	17	17	110	503	53.5	5.43
G3H0U6	Protein disulfide-isomerase A3 OS=Cricetulus griseus GN=I79_003765 PE=4 SV=1 - [G3H0U6_CRIGR]	2114.29	0.4392	1	18	21	110	444	50	5.71
Q5KR47-2	Isoform 2 of Tropomyosin alpha-3 chain OS=Bos taurus GN=TPM3 - [TPM3_BOVIN]	1640.88	0.5927	5	14	21	109	248	29	4.78
G3I255	L-lactate dehydrogenase OS=Cricetulus griseus GN=I79_017480 PE=3 SV=1 - [G3I255_CRIGR]	2466.09	0.4974	9	12	17	109	382	42.1	8.43
G3I9X8	Spectrin alpha chain, brain OS=Cricetulus griseus GN=I79_020389 PE=4 SV=1 - [G3I9X8_CRIGR]	2198.97	0.1975	1	33	33	109	2253	258.7	5.4
G3H5Q0	Actin, alpha cardiac muscle 1 OS=Cricetulus griseus GN=I79_005636 PE=3 SV=1 - [G3H5Q0_CRIGR]	1591.15	0.2759	8	2	13	107	377	42	5.39
G3H2N6	Programmed cell death 6-interacting protein OS=Cricetulus griseus GN=I79_004454 PE=4 SV=1 - [G3H2N6_CRIGR]	2152.19	0.3483	1	23	23	107	867	95.9	6.39
Q32L40	T-complex protein 1 subunit alpha OS=Bos taurus GN=TCP1 PE=1 SV=1 - [TCPA_BOVIN]	1939.67	0.4892	1	2	21	106	556	60.2	6.11
G3HNJ3	Clusterin OS=Cricetulus griseus GN=I79_012331 PE=3 SV=1 - [G3HNJ3_CRIGR]	1858.19	0.2237	1	13	13	103	447	51.7	5.74
G3HWC3	Ezrin OS=Cricetulus griseus GN=I79_015278 PE=4 SV=1 - [G3HWC3_CRIGR]	1675.15	0.4505	2	15	26	102	586	69.3	6.37
P15497	Apolipoprotein A-I OS=Bos taurus GN=APOA1 PE=1 SV=3 - [APOA1_BOVIN]	2037.41	0.6906	1	24	24	101	265	30.3	5.97
G3HGP6	T-complex protein 1 subunit alpha OS=Cricetulus griseus GN=I79_009786 PE=3 SV=1 - [G3HGP6_CRIGR]	1973.21	0.5378	1	3	22	101	556	60.3	5.99
G3HN02	Talin-1 OS=Cricetulus griseus GN=I79_012132 PE=3 SV=1 - [G3HN02_CRIGR]	1590.07	0.1314	1	11	21	101	1849	199	5.33
Q3SZ62	Phosphoglycerate mutase 1 OS=Bos taurus GN=PGAM1 PE=2 SV=3 - [PGAM1_BOVIN]	1721.56	0.5906	3	4	14	100	254	28.8	7.18
P81947	Tubulin alpha-1B chain OS=Bos taurus PE=1 SV=2 - [TBA1B_BOVIN]	2126.79	0.4701	11	0	17	99	451	50.1	5.06
G3I278	Laminin subunit beta-1 OS=Cricetulus griseus GN=I79_017505 PE=4 SV=1 - [G3I278_CRIGR]	1922.7	0.1676	2	23	24	99	1617	178	4.88
G3I8F7	Keratin, type I cytoskeletal 19 OS=Cricetulus griseus GN=I79_019825 PE=3 SV=1 - [G3I8F7_CRIGR]	1379.72	0.4566	10	16	23	99	403	44.4	5.25
G3I877	Stress-induced-phosphoprotein 1 OS=Cricetulus griseus GN=I79_019739 PE=4 SV=1 - [G3I877_CRIGR]	1327.59	0.4972	1	12	29	99	543	62.6	6.8
G3H4I2	Tropomyosin beta chain OS=Cricetulus griseus GN=I79_005183 PE=3 SV=1 - [G3H4I2_CRIGR]	1325.27	0.4151	1	4	16	98	265	30.7	4.82
G3HYB7	T-complex protein 1 subunit eta OS=Cricetulus griseus GN=I79_016041 PE=3 SV=1 - [G3HYB7_CRIGR]	1730.31	0.497	2	2	20	98	499	54.9	7.42
G3I6I6	Tubulin alpha-1A chain OS=Cricetulus griseus GN=I79_019110 PE=3 SV=1 - [G3I6I6_CRIGR]	2123.93	0.4701	12	0	17	98	451	50.1	5.06
G3HIQ1	Peptidyl-prolyl cis-trans isomerase OS=Cricetulus griseus GN=I79_010526 PE=3 SV=1 - [G3HIQ1_CRIGR]	1738.44	0.5976	11	4	10	97	164	17.9	8.28
G3GYP9	Peroxiredoxin-1 OS=Cricetulus griseus GN=I79_002954 PE=4 SV=1 - [G3GYP9_CRIGR]	1864.72	0.4874	1	6	13	96	199	22.2	7.72
G3GWP9	Urokinase-type plasminogen activator OS=Cricetulus griseus GN=I79_002178 PE=3 SV=1 - [G3GWP9_CRIGR]	1746.23	0.0932	1	3	3	93	397	44.3	8.06
G3HIM1	Basement membrane-specific heparan sulfate proteoglycan core protein OS=Cricetulus griseus GN=I79_010495 PE=4 SV=1 - [G3HIM1_CRIGR]	2136.37	0.1404	1	26	26	92	3140	333.9	6.87
G3H354	Heat shock protein HSP 90-alpha OS=Cricetulus griseus GN=I79_004665 PE=4 SV=1 - [G3H354_CRIGR]	2461.79	0.488	3	1	20	91	332	38.1	4.67
Q2HJ86	Tubulin alpha-1D chain OS=Bos taurus GN=TUBA1D PE=1 SV=1 - [TBA1D_BOVIN]	1933.41	0.4668	15	1	16	90	452	50.3	5.03
P02584	Profilin-1 OS=Bos taurus GN=PFN1 PE=1 SV=2 - [PROF1_BOVIN]	2627.78	0.45	4	4	7	90	140	15	8.28
G3HG25	Laminin subunit gamma-1 OS=Cricetulus griseus GN=I79_009544 PE=4 SV=1 - [G3HG25_CRIGR]	2271.67	0.2001	1	22	22	90	1559	172	5.07
P63243	Guanine nucleotide-binding protein subunit beta-2-like 1 OS=Bos taurus GN=GNB2L1 PE=2 SV=3 - [GBLP_BOVIN]	1758.33	0.6183	2	16	16	89	317	35.1	7.69
Q3SZV7	Hemopexin OS=Bos taurus GN=HPX PE=2 SV=1 - [HEMO_BOVIN]	1222.79	0.4967	1	19	19	88	459	52.2	7.8
G3HN88	Adenylyl cyclase-associated protein OS=Cricetulus griseus GN=I79_012224 PE=3 SV=1 - [G3HN88_CRIGR]	2014.94	0.4515	2	10	17	88	474	51.5	7.28
G3IBG3	Ubiquitin activating enzyme E1 OS=Cricetulus griseus GN=Uba1 PE=2 SV=1 - [G3IBG3_CRIGR]	2180.12	0.2807	1	9	24	87	1058	117.6	5.66
G3GZW8	Phosphoglycerate mutase 1 OS=Cricetulus griseus GN=I79_003415 PE=4 SV=1 - [G3GZW8_CRIGR]	1575.4	0.7978	3	3	13	87	178	20.2	8.12
Q3ZCI9	T-complex protein 1 subunit theta OS=Bos taurus GN=CCT8 PE=1 SV=3 - [TCPQ_BOVIN]	2156.89	0.3175	1	5	15	86	548	59.6	5.59
G3IEG6	Tubulin beta-2A chain OS=Cricetulus griseus GN=I79_022113 PE=3 SV=1 - [G3IEG6_CRIGR]	2479.58	0.4831	4	2	17	86	445	49.9	4.96
P81187	Complement factor B OS=Bos taurus GN=CFB PE=1 SV=2 - [CFAB_BOVIN]	1521.85	0.3745	2	20	20	85	761	85.3	7.68
G3IDM2	Cofilin-1 OS=Cricetulus griseus GN=I79_021805 PE=4 SV=1 - [G3IDM2_CRIGR]	2078.88	0.6928	2	11	14	84	166	18.5	8.09
G3HKZ1	14-3-3 protein zeta/delta OS=Cricetulus griseus GN=I79_011374 PE=3 SV=1 - [G3HKZ1_CRIGR]	2160.33	0.5388	3	9	13	84	245	27.7	4.79
G3HWE9	Tubulin alpha-4A chain OS=Cricetulus griseus GN=I79_015306 PE=3 SV=1 - [G3HWE9_CRIGR]	1606.4	0.4896	8	4	17	83	433	48.3	5.01
Q3T052	Inter-alpha-trypsin inhibitor heavy chain H4 OS=Bos taurus GN=ITIH4 PE=1 SV=1 - [ITIH4_BOVIN]	1970.5	0.3199	1	22	22	83	916	101.4	6.68
G3H5V0	Importin subunit beta-1 OS=Cricetulus griseus GN=I79_005692 PE=4 SV=1 - [G3H5V0_CRIGR]	1794.81	0.1795	1	26	26	83	1894	211.1	4.87
G3GYC6	Profilin-1 OS=Cricetulus griseus GN=I79_002801 PE=4 SV=1 - [G3GYC6_CRIGR]	2071.06	0.6364	1	1	4	83	55	6	9.88
Q2NKZ1	T-complex protein 1 subunit eta OS=Bos taurus GN=CCT7 PE=1 SV=1 - [TCPH_BOVIN]	1622.69	0.4751	2	2	20	82	543	59.4	7.2
Q5E956	Triosephosphate isomerase OS=Bos taurus GN=TPI1 PE=2 SV=3 - [TPIS_BOVIN]	2106.04	0.4819	2	9	12	82	249	26.7	6.92
G3IBL4	Glucose-6-phosphate 1-dehydrogenase OS=Cricetulus griseus GN=I79_021040 PE=3 SV=1 - [G3IBL4_CRIGR]	1382.49	0.3365	1	16	16	82	624	71.3	6.51
P61286	Polyadenylate-binding protein 1 OS=Bos taurus GN=PABPC1 PE=2 SV=1 - [PABP1_BOVIN]	1679.49	0.3208	6	10	18	81	636	70.6	9.5
G3H7K5	T-complex protein 1 subunit epsilon OS=Cricetulus griseus GN=I79_006338 PE=3 SV=1 - [G3H7K5_CRIGR]	999.86	0.4898	1	18	19	80	541	59.5	5.5
P10103	High mobility group protein B1 OS=Bos taurus GN=HMGB1 PE=1 SV=3 - [HMGB1_BOVIN]	868.73	0.4512	16	12	14	79	215	24.9	5.74
G3IF62	Ras GTPase-activating-like protein IQGAP1 OS=Cricetulus griseus GN=I79_022378 PE=4 SV=1 - [G3IF62_CRIGR]	1597.85	0.1952	3	24	24	79	1675	191.3	6.64
G3IH97	Keratin, type I cytoskeletal 18 OS=Cricetulus griseus GN=I79_023185 PE=3 SV=1 - [G3IH97_CRIGR]	1374.42	0.4691	9	19	21	79	437	49.1	5.33
Q6EWQ7	Eukaryotic translation initiation factor 5A-1 OS=Bos taurus GN=EIF5A PE=2 SV=3 - [IF5A1_BOVIN]	1116.8	0.6169	4	12	12	78	154	16.8	5.24
Q5E9F5	Transgelin-2 OS=Bos taurus GN=TAGLN2 PE=2 SV=3 - [TAGL2_BOVIN]	2261.8	0.593	1	5	12	78	199	22.4	8.24
Q9TTE1	Serpin A3-1 OS=Bos taurus GN=SERPINA3-1 PE=1 SV=3 - [SPA31_BOVIN]	1696.5	0.3796	2	6	16	78	411	46.2	5.99
G3IEY9	14-3-3 protein theta OS=Cricetulus griseus GN=I79_022299 PE=3 SV=1 - [G3IEY9_CRIGR]	1871.68	0.498	5	12	15	78	245	27.7	4.78
G3HCX8	Calreticulin OS=Cricetulus griseus GN=I79_008346 PE=3 SV=1 - [G3HCX8_CRIGR]	1005.56	0.5156	3	13	13	78	417	48.2	4.49
Q3MHL3	Histone-binding protein RBBP4 OS=Bos taurus GN=RBBP4 PE=1 SV=3 - [RBBP4_BOVIN]	1125.22	0.2612	6	6	10	77	425	47.6	4.89
G3HNY5	Phosphoglycerate kinase OS=Cricetulus griseus GN=I79_012486 PE=3 SV=1 - [G3HNY5_CRIGR]	1633.59	0.6901	2	4	12	77	242	25.5	5.78
G3HBD4	Nucleoside diphosphate kinase OS=Cricetulus griseus GN=I79_007762 PE=3 SV=1 - [G3HBD4_CRIGR]	1562.01	0.7632	3	9	11	77	152	17.2	6.33
G3GUV4	Stromelysin-2 OS=Cricetulus griseus GN=I79_001478 PE=4 SV=1 - [G3GUV4_CRIGR]	1167.26	0.1439	1	15	15	77	966	107.6	6.2
Q3SZ54	Eukaryotic initiation factor 4A-I OS=Bos taurus GN=EIF4A1 PE=2 SV=1 - [IF4A1_BOVIN]	1865.58	0.4384	3	15	16	76	406	46.1	5.48
G3HEY9	Catenin alpha-1 OS=Cricetulus griseus GN=I79_009138 PE=4 SV=1 - [G3HEY9_CRIGR]	2018.75	0.4183	4	24	24	75	906	100	6.29
Q3T0P6	Phosphoglycerate kinase 1 OS=Bos taurus GN=PGK1 PE=2 SV=3 - [PGK1_BOVIN]	1551.85	0.3957	3	1	16	74	417	44.5	8.27
P05307	Protein disulfide-isomerase OS=Bos taurus GN=P4HB PE=1 SV=1 - [PDIA1_BOVIN]	1258.06	0.3451	4	15	19	74	510	57.2	4.91
G3I437	Agrin OS=Cricetulus griseus GN=I79_018184 PE=4 SV=1 - [G3I437_CRIGR]	1632.13	0.1631	1	23	23	74	2036	217	5.8
G3HBI1	Peroxidasin-like OS=Cricetulus griseus GN=I79_007809 PE=4 SV=1 - [G3HBI1_CRIGR]	1295.27	0.1946	1	20	20	74	1475	165.3	7.05
G3H2M7	Laminin subunit beta-3 OS=Cricetulus griseus GN=I79_004442 PE=4 SV=1 - [G3H2M7_CRIGR]	1671.06	0.187	1	19	19	74	1166	127.9	7.24
P10096	Glyceraldehyde-3-phosphate dehydrogenase OS=Bos taurus GN=GAPDH PE=1 SV=4 - [G3P_BOVIN]	2080	0.3123	16	1	8	73	333	35.8	8.35
G3HZ55	Integrin beta OS=Cricetulus griseus GN=I79_016350 PE=3 SV=1 - [G3HZ55_CRIGR]	1369.71	0.1679	3	12	12	72	798	88.3	5.78
G3H7Z2	Transgelin-2 OS=Cricetulus griseus GN=I79_006488 PE=4 SV=1 - [G3H7Z2_CRIGR]	2093.57	0.598	1	4	11	72	199	22.4	8.57
P17690	Beta-2-glycoprotein 1 OS=Bos taurus GN=APOH PE=1 SV=4 - [APOH_BOVIN]	1246.91	0.5449	1	13	13	71	345	38.2	8.15
G3GTX5	Amyloid-like protein 2 OS=Cricetulus griseus GN=I79_001115 PE=4 SV=1 - [G3GTX5_CRIGR]	1420.65	0.2346	1	16	16	71	682	78.3	4.86
G3HZ42	T-complex protein 1 subunit beta OS=Cricetulus griseus GN=I79_016337 PE=3 SV=1 - [G3HZ42_CRIGR]	1787.18	0.5009	1	4	18	70	535	57.5	6.46
G3IHY5	6-phosphogluconate dehydrogenase, decarboxylating OS=Cricetulus griseus GN=I79_023445 PE=3 SV=1 - [G3IHY5_CRIGR]	1177.12	0.2008	1	10	10	70	483	53.3	6.61
P68252	14-3-3 protein gamma OS=Bos taurus GN=YWHAG PE=1 SV=2 - [1433G_BOVIN]	1530.72	0.6194	4	9	14	69	247	28.2	4.89
Q3T0K2	T-complex protein 1 subunit gamma OS=Bos taurus GN=CCT3 PE=1 SV=1 - [TCPG_BOVIN]	1043.44	0.4734	2	19	19	69	545	60.5	6.8
G3H2C4	Heat shock 70 kDa protein 4 (Fragment) OS=Cricetulus griseus GN=I79_004332 PE=4 SV=1 - [G3H2C4_CRIGR]	1116.06	0.3614	2	16	17	69	559	63	5.08
P68103	Elongation factor 1-alpha 1 OS=Bos taurus GN=EEF1A1 PE=2 SV=1 - [EF1A1_BOVIN]	1496.48	0.5216	4	3	13	68	462	50.1	9.01
Q32PF2	ATP-citrate synthase OS=Bos taurus GN=ACLY PE=2 SV=1 - [ACLY_BOVIN]	1657.68	0.2832	3	10	22	68	1091	119.7	7.24
G3IBK9	Rab GDP dissociation inhibitor alpha OS=Cricetulus griseus GN=I79_021035 PE=4 SV=1 - [G3IBK9_CRIGR]	927.83	0.2518	1	4	11	68	425	48.1	5.4
G3IBN9	Keratin, type II cytoskeletal 71 OS=Cricetulus griseus GN=I79_021070 PE=3 SV=1 - [G3IBN9_CRIGR]	1255.45	0.119	10	4	13	68	1202	133.3	6.55
G3HAN8	Adenosylhomocysteinase OS=Cricetulus griseus GN=I79_007494 PE=3 SV=1 - [G3HAN8_CRIGR]	1167.85	0.3426	5	13	13	68	432	47.6	6.54
P06394	Keratin, type I cytoskeletal 10 OS=Bos taurus GN=KRT10 PE=3 SV=1 - [K1C10_BOVIN]	1508.55	0.1635	9	5	12	67	526	54.8	5.11
A2I7N0	Serpin A3-4 OS=Bos taurus GN=SERPINA3-4 PE=3 SV=1 - [SPA34_BOVIN]	925.45	0.2798	4	1	12	67	411	46.3	6.32
G3HRK0	Proliferation-associated protein 2G4 OS=Cricetulus griseus GN=I79_013505 PE=4 SV=1 - [G3HRK0_CRIGR]	1086.02	0.4467	1	16	16	67	394	43.7	6.7
G3GZE6	Actin-related protein 3 OS=Cricetulus griseus GN=I79_003209 PE=3 SV=1 - [G3GZE6_CRIGR]	1319.43	0.4641	2	15	15	66	418	47.3	5.88
Q0P569	Nucleobindin-1 OS=Bos taurus GN=NUCB1 PE=2 SV=1 - [NUCB1_BOVIN]	1239.3	0.3671	1	13	17	66	474	54.9	5.21
A1A4K3	DNA damage-binding protein 1 OS=Bos taurus GN=DDB1 PE=2 SV=1 - [DDB1_BOVIN]	785.79	0.1825	2	15	15	66	1140	126.8	5.26
G3IKI6	Keratin, type II cytoskeletal 1b OS=Cricetulus griseus GN=I79_024389 PE=3 SV=1 - [G3IKI6_CRIGR]	1549.86	0.0994	4	3	8	66	835	93.4	5.45
G3HWJ3	Putative uncharacterized protein OS=Cricetulus griseus GN=I79_015376 PE=4 SV=1 - [G3HWJ3_CRIGR]	1134.97	0.1699	3	24	24	66	2072	231.1	5.55
G3HYJ9	Moesin OS=Cricetulus griseus GN=I79_016134 PE=4 SV=1 - [G3HYJ9_CRIGR]	1440.07	0.4608	1	2	12	65	293	34.5	5.66
Q3ZBH0	T-complex protein 1 subunit beta OS=Bos taurus GN=CCT2 PE=1 SV=3 - [TCPB_BOVIN]	1883.36	0.3776	1	1	15	64	535	57.4	6.64
G3I1S5	Glyceraldehyde-3-phosphate dehydrogenase OS=Cricetulus griseus GN=I79_017344 PE=3 SV=1 - [G3I1S5_CRIGR]	1683.18	0.3096	15	2	6	64	197	21.2	6.19
G3IDU7	Beta-glucuronidase OS=Cricetulus griseus GN=I79_021884 PE=4 SV=1 - [G3IDU7_CRIGR]	606.02	0.1559	1	10	10	64	648	74.8	6.76
G3HFP1	Radixin OS=Cricetulus griseus GN=I79_009404 PE=4 SV=1 - [G3HFP1_CRIGR]	1044.45	0.2024	2	1	14	64	583	68.5	6.27
Q5KR48	Tropomyosin beta chain OS=Bos taurus GN=TPM2 PE=2 SV=1 - [TPM2_BOVIN]	904.36	0.2641	2	1	11	63	284	32.8	4.7
P41361	Antithrombin-III OS=Bos taurus GN=SERPINC1 PE=1 SV=2 - [ANT3_BOVIN]	1032.8	0.3935	1	11	16	63	465	52.3	7.33
G3IKH9	Phosphoserine aminotransferase OS=Cricetulus griseus GN=I79_024382 PE=3 SV=1 - [G3IKH9_CRIGR]	1309.02	0.4013	1	12	12	63	309	33.9	7.97
G3HES3	Exportin-2 OS=Cricetulus griseus GN=I79_009067 PE=4 SV=1 - [G3HES3_CRIGR]	1071.76	0.1761	2	14	14	63	971	110.3	5.77
Q3ZBZ8	Stress-induced-phosphoprotein 1 OS=Bos taurus GN=STIP1 PE=2 SV=1 - [STIP1_BOVIN]	1042.92	0.3131	1	1	18	62	543	62.4	6.43
G3GZG6	Serotransferrin OS=Cricetulus griseus GN=I79_003225 PE=4 SV=1 - [G3GZG6_CRIGR]	1452.4	0.0962	1	11	14	62	1227	134.5	7.28
G3HL13	60 kDa heat shock protein, mitochondrial OS=Cricetulus griseus GN=I79_011398 PE=3 SV=1 - [G3HL13_CRIGR]	1271.8	0.365	6	16	16	61	526	56.5	7.31
Q58D62	Fetuin-B OS=Bos taurus GN=FETUB PE=2 SV=1 - [FETUB_BOVIN]	1019.09	0.4419	1	13	13	60	387	42.6	5.77
G3GZR1	Aspartyl-tRNA synthetase, cytoplasmic OS=Cricetulus griseus GN=I79_003356 PE=3 SV=1 - [G3GZR1_CRIGR]	1047.24	0.3278	2	4	15	60	479	54.4	6.38
G3GU60	Phosphatidylethanolamine-binding protein 1 OS=Cricetulus griseus GN=I79_001211 PE=4 SV=1 - [G3GU60_CRIGR]	1505.4	0.8075	2	11	11	60	187	20.9	7.11
P01044-2	Isoform LMW of Kininogen-1 OS=Bos taurus GN=KNG1 - [KNG1_BOVIN]	1058.76	0.3784	2	7	13	59	436	48.4	6.3
Q2T9X2	T-complex protein 1 subunit delta OS=Bos taurus GN=CCT4 PE=1 SV=3 - [TCPD_BOVIN]	1053.73	0.3173	1	7	13	59	542	58.2	7.33
G3GUM6	Glyceraldehyde-3-phosphate dehydrogenase OS=Cricetulus griseus GN=I79_001391 PE=3 SV=1 - [G3GUM6_CRIGR]	1469.76	0.4885	12	1	8	59	260	27.5	9
G3HH39	Elongation factor 1-alpha 1 OS=Cricetulus griseus GN=I79_009935 PE=4 SV=1 - [G3HH39_CRIGR]	1263.79	0.4394	2	2	12	59	503	55.1	9.33
G3GY22	Ras-related protein Rap-1b OS=Cricetulus griseus GN=I79_002677 PE=4 SV=1 - [G3GY22_CRIGR]	1511.85	0.6739	2	13	13	58	184	20.8	5.78
G3IAX3	Pyruvate kinase OS=Cricetulus griseus GN=I79_020755 PE=3 SV=1 - [G3IAX3_CRIGR]	1591.41	0.2646	3	1	10	58	461	50.4	7.81
G3HEH7	Semaphorin-7A OS=Cricetulus griseus GN=I79_008961 PE=4 SV=1 - [G3HEH7_CRIGR]	751.71	0.3321	1	14	14	58	560	63.8	7.01
G3I3Y6	Glutathione S-transferase P OS=Cricetulus griseus GN=I79_018157 PE=3 SV=1 - [G3I3Y6_CRIGR]	1136.58	0.3167	1	6	6	57	221	25	8.12
G3I4N3	Lysine--tRNA ligase OS=Cricetulus griseus GN=I79_018416 PE=3 SV=1 - [G3I4N3_CRIGR]	709.02	0.1613	1	13	13	57	626	71.4	6.62
G3HA23	Malate dehydrogenase (Fragment) OS=Cricetulus griseus GN=I79_007263 PE=4 SV=1 - [G3HA23_CRIGR]	1277.04	0.6642	2	13	13	57	271	28.7	8.81
G3H0L9	Cathepsin B OS=Cricetulus griseus GN=I79_003681 PE=3 SV=1 - [G3H0L9_CRIGR]	1198.16	0.2743	2	10	10	57	339	37.5	6.13
Q28085	Complement factor H OS=Bos taurus GN=CFH PE=1 SV=3 - [CFAH_BOVIN]	1409.55	0.1675	1	15	15	56	1236	140.3	6.81
G3IED5	Peptidyl-prolyl cis-trans isomerase A OS=Cricetulus griseus GN=I79_022082 PE=4 SV=1 - [G3IED5_CRIGR]	961.03	0.1945	9	1	7	56	401	44.9	9.54
G3I3F3	Ribonuclease inhibitor OS=Cricetulus griseus GN=I79_017958 PE=4 SV=1 - [G3I3F3_CRIGR]	1397.15	0.3399	1	10	10	56	456	50	4.84
Q3SYZ4	Aspartate--tRNA ligase, cytoplasmic OS=Bos taurus GN=DARS PE=2 SV=1 - [SYDC_BOVIN]	824.99	0.3114	1	3	14	56	501	57	6.84
G3H8V5	Lysosomal protective protein OS=Cricetulus griseus GN=I79_006816 PE=4 SV=1 - [G3H8V5_CRIGR]	1047.28	0.1705	1	9	9	56	475	54.2	6.11
P04272	Annexin A2 OS=Bos taurus GN=ANXA2 PE=1 SV=2 - [ANXA2_BOVIN]	1432.46	0.531	1	6	17	55	339	38.6	7.31
G3GUQ0	Gamma-enolase OS=Cricetulus griseus GN=I79_001417 PE=3 SV=1 - [G3GUQ0_CRIGR]	1572.34	0.1889	2	2	7	55	434	47.2	5.07
P62157	Calmodulin OS=Bos taurus GN=CALM PE=1 SV=2 - [CALM_BOVIN]	1088.54	0.557	5	7	7	54	149	16.8	4.22
Q3SWX8	Histone-binding protein RBBP7 OS=Bos taurus GN=RBBP7 PE=2 SV=1 - [RBBP7_BOVIN]	887.22	0.1459	4	2	6	54	425	47.8	5.05
G3I1V4	Bifunctional purine biosynthesis protein PURH OS=Cricetulus griseus GN=I79_017373 PE=4 SV=1 - [G3I1V4_CRIGR]	790.52	0.4172	2	20	20	54	592	64.6	6.98
G3HZF4	Chloride intracellular channel protein 1 OS=Cricetulus griseus GN=I79_016455 PE=4 SV=1 - [G3HZF4_CRIGR]	1216.87	0.5726	1	3	12	54	241	26.9	5.17
P05786	Keratin, type II cytoskeletal 8 OS=Bos taurus GN=KRT8 PE=2 SV=3 - [K2C8_BOVIN]	919.35	0.1527	6	2	10	53	478	53.6	5.69
G3I064	Neutral alpha-glucosidase AB OS=Cricetulus griseus GN=I79_016741 PE=4 SV=1 - [G3I064_CRIGR]	987.77	0.1716	1	14	14	53	944	106.9	6.02
G3I2B6	Serine/threonine-protein phosphatase 2A 65 kDa regulatory subunit A alpha isoform (Fragment) OS=Cricetulus griseus GN=I79_017545 PE=4 SV=1 - [G3I2B6_CRIGR]	980.36	0.382	1	13	15	53	534	59	5.14
A2I7N1	Serpin A3-5 OS=Bos taurus GN=SERPINA3-5 PE=3 SV=1 - [SPA35_BOVIN]	870.89	0.2336	2	1	11	52	411	46.4	6.96
Q3T0D0	Heterogeneous nuclear ribonucleoprotein K OS=Bos taurus GN=HNRNPK PE=2 SV=1 - [HNRPK_BOVIN]	1368.11	0.3793	1	3	13	52	464	51	5.26
G3H412	Proliferating cell nuclear antigen OS=Cricetulus griseus GN=I79_005005 PE=3 SV=1 - [G3H412_CRIGR]	871.37	0.4904	2	10	10	52	261	28.8	4.69
G3HE00	Follistatin (Fragment) OS=Cricetulus griseus GN=I79_008769 PE=4 SV=1 - [G3HE00_CRIGR]	1127.23	0.3861	1	5	10	52	316	34.8	5.8
Q3T054	GTP-binding nuclear protein Ran OS=Bos taurus GN=RAN PE=2 SV=3 - [RAN_BOVIN]	777.25	0.4861	5	11	11	51	216	24.4	7.49
Q3SYV4	Adenylyl cyclase-associated protein 1 OS=Bos taurus GN=CAP1 PE=2 SV=3 - [CAP1_BOVIN]	1007.88	0.2267	2	2	9	51	472	51.2	7.52
G3GWQ1	Vinculin OS=Cricetulus griseus GN=I79_002180 PE=4 SV=1 - [G3GWQ1_CRIGR]	926.6	0.2073	1	18	18	50	1143	124.8	5.58
G3H533	Peptidyl-prolyl cis-trans isomerase OS=Cricetulus griseus GN=I79_005402 PE=3 SV=1 - [G3H533_CRIGR]	804.18	0.5694	4	11	12	50	216	23.6	9.58
G3HNY4	Phosphoglycerate kinase OS=Cricetulus griseus GN=I79_012485 PE=3 SV=1 - [G3HNY4_CRIGR]	650.16	0.702	1	4	12	50	151	16.3	8.85
G3HLS2	14-3-3 protein beta/alpha OS=Cricetulus griseus GN=I79_011666 PE=3 SV=1 - [G3HLS2_CRIGR]	913.59	0.4754	3	1	11	49	244	27.8	4.83
P68250	14-3-3 protein beta/alpha OS=Bos taurus GN=YWHAB PE=1 SV=2 - [1433B_BOVIN]	970.86	0.4756	2	1	11	49	246	28.1	4.87
A3KMV5	Ubiquitin-like modifier-activating enzyme 1 OS=Bos taurus GN=UBA1 PE=2 SV=1 - [UBA1_BOVIN]	1050.19	0.1805	1	1	16	49	1058	117.8	5.77
Q3SYW6	Eukaryotic translation initiation factor 3 subunit C OS=Bos taurus GN=EIF3C PE=2 SV=1 - [EIF3C_BOVIN]	963.16	0.1535	3	12	12	49	912	105.3	5.81
G3HBI9	Leukotriene A-4 hydrolase OS=Cricetulus griseus GN=I79_007819 PE=4 SV=1 - [G3HBI9_CRIGR]	1559.89	0.3932	1	8	14	49	529	59.7	6.28
G3HSE4	Proteasome subunit alpha type OS=Cricetulus griseus GN=I79_013775 PE=3 SV=1 - [G3HSE4_CRIGR]	902.37	0.3764	2	9	9	49	263	29.5	6.46
G3ID81	Beta-actin-like protein 2 OS=Cricetulus griseus GN=I79_021654 PE=3 SV=1 - [G3ID81_CRIGR]	929.97	0.242	3	1	6	48	376	42.1	5.48
G3H0C2	Proteasome subunit alpha type OS=Cricetulus griseus GN=I79_003577 PE=3 SV=1 - [G3H0C2_CRIGR]	1110.6	0.705	2	13	13	48	261	29.5	7.72
G3GS70	Importin-5 OS=Cricetulus griseus GN=I79_000383 PE=4 SV=1 - [G3GS70_CRIGR]	1472.94	0.1923	1	11	11	48	801	89.7	4.97
G3II08	Keratin, type II cytoskeletal 7 OS=Cricetulus griseus GN=I79_023469 PE=4 SV=1 - [G3II08_CRIGR]	903.68	0.2463	5	6	10	48	341	38.6	5.34
G3I5L3	Annexin OS=Cricetulus griseus GN=I79_018766 PE=3 SV=1 - [G3I5L3_CRIGR]	980.49	0.3699	2	11	11	48	346	38.8	7.02
G3HBD3	Nucleoside diphosphate kinase OS=Cricetulus griseus GN=I79_007761 PE=3 SV=1 - [G3HBD3_CRIGR]	933.18	0.7368	1	6	8	48	152	17.3	7.99
G3HNV4	Triosephosphate isomerase OS=Cricetulus griseus GN=I79_012448 PE=3 SV=1 - [G3HNV4_CRIGR]	916.56	0.32	1	4	7	48	150	16.4	8.19
G3HIC5	RuvB-like 1 OS=Cricetulus griseus GN=I79_010385 PE=4 SV=1 - [G3HIC5_CRIGR]	600.75	0.3048	1	10	10	47	456	50.2	6.42
G3HWJ2	Plectin-1 OS=Cricetulus griseus GN=I79_015375 PE=4 SV=1 - [G3HWJ2_CRIGR]	539.97	0.2	1	12	12	47	720	83.4	8.54
G3H9I9	Hepatocyte growth factor receptor OS=Cricetulus griseus GN=I79_007063 PE=4 SV=1 - [G3H9I9_CRIGR]	1377.7	0.1522	2	14	14	47	1222	136.8	6.6
Q5E947	Peroxiredoxin-1 OS=Bos taurus GN=PRDX1 PE=2 SV=1 - [PRDX1_BOVIN]	990.12	0.3869	2	2	9	46	199	22.2	8.4
Q3MHL7	T-complex protein 1 subunit zeta OS=Bos taurus GN=CCT6A PE=1 SV=3 - [TCPZ_BOVIN]	1189.46	0.3145	2	2	13	46	531	57.9	6.76
G3IAS8	Kinesin-like protein KIF27 OS=Cricetulus griseus GN=I79_020709 PE=3 SV=1 - [G3IAS8_CRIGR]	1233.99	0.0795	1	1	11	46	1648	185.6	6.51
G3GXB0	Rho GDP-dissociation inhibitor 1 OS=Cricetulus griseus GN=I79_002400 PE=4 SV=1 - [G3GXB0_CRIGR]	978.61	0.6127	1	4	10	46	204	23.4	5.2
G3H2T7	Histone H3 OS=Cricetulus griseus GN=I79_004539 PE=3 SV=1 - [G3H2T7_CRIGR]	989.22	0.4607	12	2	9	46	267	29.6	11.11
G3HJB1	Alpha-actinin-4 OS=Cricetulus griseus GN=I79_010753 PE=4 SV=1 - [G3HJB1_CRIGR]	1104.5	0.5427	1	1	11	46	234	26.2	4.82
A7MB62	Actin-related protein 2 OS=Bos taurus GN=ACTR2 PE=1 SV=1 - [ARP2_BOVIN]	560.99	0.3604	19	12	12	45	394	44.7	6.74
P68509	14-3-3 protein eta OS=Bos taurus GN=YWHAH PE=1 SV=2 - [1433F_BOVIN]	1098.14	0.4146	3	7	10	45	246	28.2	4.89
G3H996	Catenin beta-1 OS=Cricetulus griseus GN=I79_006962 PE=4 SV=1 - [G3H996_CRIGR]	661.57	0.1793	2	8	12	45	781	85.4	5.86
G3I7D7	RNA-binding protein FUS OS=Cricetulus griseus GN=I79_019424 PE=4 SV=1 - [G3I7D7_CRIGR]	1004.88	0.3512	3	7	7	45	205	21.2	10.04
G3I7Z8	Importin-7 OS=Cricetulus griseus GN=I79_019653 PE=4 SV=1 - [G3I7Z8_CRIGR]	691.08	0.1744	2	15	15	45	1038	119.4	4.82
G3HXL1	Poly(RC)-binding protein 1 OS=Cricetulus griseus GN=I79_015737 PE=4 SV=1 - [G3HXL1_CRIGR]	1179.35	0.2978	2	5	7	44	356	37.5	7.09
P00735	Prothrombin OS=Bos taurus GN=F2 PE=1 SV=2 - [THRB_BOVIN]	647.93	0.3056	7	14	14	44	625	70.5	6.33
P26882	Peptidyl-prolyl cis-trans isomerase D OS=Bos taurus GN=PPID PE=1 SV=6 - [PPID_BOVIN]	564.38	0.2108	1	5	9	44	370	40.6	6.55
G3IG05	Annexin OS=Cricetulus griseus GN=I79_022682 PE=3 SV=1 - [G3IG05_CRIGR]	1283.01	0.6393	1	3	14	44	244	27	5.97
G3H638	Activator of 90 kDa heat shock protein ATPase-like 1 OS=Cricetulus griseus GN=I79_005789 PE=4 SV=1 - [G3H638_CRIGR]	500.61	0.4911	2	13	13	44	338	38.1	5.53
G3HJM2	Glycyl-tRNA synthetase OS=Cricetulus griseus GN=I79_010870 PE=4 SV=1 - [G3HJM2_CRIGR]	341.69	0.2303	1	12	12	44	634	71.6	5.45
Q95121	Pigment epithelium-derived factor OS=Bos taurus GN=SERPINF1 PE=1 SV=1 - [PEDF_BOVIN]	855.5	0.2476	2	8	8	43	416	46.2	7.05
O77834	Peroxiredoxin-6 OS=Bos taurus GN=PRDX6 PE=1 SV=3 - [PRDX6_BOVIN]	552.88	0.2277	1	7	7	43	224	25.1	6.38
G3H4Z5	C-1-tetrahydrofolate synthase, cytoplasmic OS=Cricetulus griseus GN=I79_005359 PE=3 SV=1 - [G3H4Z5_CRIGR]	634.83	0.1624	3	13	13	43	936	101.2	7.78
G3HYQ1	14-3-3 protein sigma OS=Cricetulus griseus GN=I79_016192 PE=3 SV=1 - [G3HYQ1_CRIGR]	1115.44	0.4839	4	6	9	43	248	27.7	4.78
G3I2M1	T-complex protein 1 subunit zeta OS=Cricetulus griseus GN=I79_017661 PE=3 SV=1 - [G3I2M1_CRIGR]	1016.34	0.2976	3	2	13	43	531	57.9	6.9
G3H2E2	Heterogeneous nuclear ribonucleoprotein A/B OS=Cricetulus griseus GN=I79_004352 PE=4 SV=1 - [G3H2E2_CRIGR]	786.73	0.4218	1	9	10	43	211	23.7	9.61
G3GUI3	FK506-binding protein 4 OS=Cricetulus griseus GN=I79_001345 PE=4 SV=1 - [G3GUI3_CRIGR]	606.95	0.2725	1	3	9	43	411	46.6	5.81
G3I4W4	Prothymosin alpha OS=Cricetulus griseus GN=I79_018503 PE=4 SV=1 - [G3I4W4_CRIGR]	1816.84	0.2295	3	1	1	43	61	6.6	3.9
P18203	Peptidyl-prolyl cis-trans isomerase FKBP1A OS=Bos taurus GN=FKBP1A PE=1 SV=2 - [FKB1A_BOVIN]	1222.66	0.4167	2	6	6	42	108	11.9	8.15
Q3T147	Spliceosome RNA helicase DDX39B OS=Bos taurus GN=DDX39B PE=2 SV=1 - [DX39B_BOVIN]	479.6	0.2897	4	4	12	42	428	48.9	5.67
Q5E9B7	Chloride intracellular channel protein 1 OS=Bos taurus GN=CLIC1 PE=2 SV=3 - [CLIC1_BOVIN]	1007.56	0.5394	1	1	10	42	241	27	5.27
O77656	Collagenase 3 OS=Bos taurus GN=MMP13 PE=2 SV=1 - [MMP13_BOVIN]	770.22	0.0934	1	4	5	42	471	53.9	5.68
G3HA54	Plasminogen activator inhibitor 1 OS=Cricetulus griseus GN=I79_007296 PE=3 SV=1 - [G3HA54_CRIGR]	699.91	0.2556	1	5	6	42	270	30.7	6.23
P01045-2	Isoform LMW of Kininogen-2 OS=Bos taurus GN=KNG2 - [KNG2_BOVIN]	784.54	0.2512	2	2	8	41	434	48.1	6.01
P26452	40S ribosomal protein SA OS=Bos taurus GN=RPSA PE=2 SV=4 - [RSSA_BOVIN]	859.22	0.3559	7	10	10	41	295	32.9	4.87
G3HD18	ATP-dependent RNA helicase DDX39 OS=Cricetulus griseus GN=I79_008391 PE=4 SV=1 - [G3HD18_CRIGR]	431.69	0.3042	3	5	13	41	424	48.7	5.78
G3H935	Tyrosyl-tRNA synthetase, cytoplasmic OS=Cricetulus griseus GN=I79_006897 PE=4 SV=1 - [G3H935_CRIGR]	656.17	0.3314	2	15	15	41	528	59.2	6.99
G3HMG4	Amyloid beta A4 protein OS=Cricetulus griseus GN=I79_011926 PE=4 SV=1 - [G3HMG4_CRIGR]	706.18	0.1594	1	6	6	41	433	49.1	6.05
G3IBP3	Keratin, type II cytoskeletal 2 epidermal OS=Cricetulus griseus GN=I79_021074 PE=3 SV=1 - [G3IBP3_CRIGR]	1148.34	0.1429	4	4	8	41	441	45.9	8.13
G3GW47	Arginyl-tRNA synthetase, cytoplasmic OS=Cricetulus griseus GN=I79_001963 PE=3 SV=1 - [G3GW47_CRIGR]	489.46	0.2232	1	10	13	41	542	62	6.62
G3ILI3	Seryl-tRNA synthetase, cytoplasmic OS=Cricetulus griseus GN=I79_024749 PE=3 SV=1 - [G3ILI3_CRIGR]	819.68	0.2637	2	10	10	41	512	58.6	6.19
Q3SZ57	Alpha-fetoprotein OS=Bos taurus GN=AFP PE=2 SV=1 - [FETA_BOVIN]	435.26	0.1607	1	7	9	40	610	68.5	6.29
P28800	Alpha-2-antiplasmin OS=Bos taurus GN=SERPINF2 PE=1 SV=2 - [A2AP_BOVIN]	1048.32	0.2907	1	9	9	40	492	54.7	5.72
P02081	Hemoglobin fetal subunit beta OS=Bos taurus PE=1 SV=1 - [HBBF_BOVIN]	1089.91	0.7655	3	10	10	40	145	15.8	7.03
P02253	Histone H1.2 OS=Bos taurus GN=HIST1H1C PE=1 SV=2 - [H12_BOVIN]	674.72	0.2394	6	4	7	40	213	21.3	11
Q2KJH4	WD repeat-containing protein 1 OS=Bos taurus GN=WDR1 PE=2 SV=3 - [WDR1_BOVIN]	651.55	0.264	1	3	10	40	606	66.2	6.73
G3I4W7	Cathepsin D OS=Cricetulus griseus GN=I79_018506 PE=3 SV=1 - [G3I4W7_CRIGR]	766.98	0.2157	1	6	7	40	408	44.1	6.98
G3HPV6	Histone H2A type 1 OS=Cricetulus griseus GN=I79_012827 PE=3 SV=1 - [G3HPV6_CRIGR]	792.51	0.3206	6	6	9	40	262	28.4	11.03
G3IKI7	Keratin, type II cytoskeletal 2 oral OS=Cricetulus griseus GN=I79_024390 PE=4 SV=1 - [G3IKI7_CRIGR]	710.72	0.0748	5	1	6	40	655	67.8	7.78
P35950	Low-density lipoprotein receptor OS=Cricetulus griseus GN=LDLR PE=3 SV=2 - [LDLR_CRIGR]	885.48	0.152	4	11	11	40	862	95.2	4.97
G3HYP6	Nuclear migration protein nudC OS=Cricetulus griseus GN=I79_016187 PE=4 SV=1 - [G3HYP6_CRIGR]	357.86	0.3156	2	4	9	40	282	32.8	5.99
G3I737	40S ribosomal protein S12 OS=Cricetulus griseus GN=I79_019322 PE=3 SV=1 - [G3I737_CRIGR]	547.68	0.5868	3	7	7	40	121	13.5	7.93
G3H0C9	L-lactate dehydrogenase A chain OS=Cricetulus griseus GN=I79_003584 PE=3 SV=1 - [G3H0C9_CRIGR]	729.49	0.4103	3	1	5	40	156	17.3	5.9
Q3SX14	Gelsolin OS=Bos taurus GN=GSN PE=2 SV=1 - [GELS_BOVIN]	740.02	0.1683	1	5	9	39	731	80.7	5.78
G3HIQ0	Threonyl-tRNA synthetase, cytoplasmic OS=Cricetulus griseus GN=I79_010525 PE=3 SV=1 - [G3HIQ0_CRIGR]	576.21	0.1704	3	11	12	39	722	83.4	7.02
G3IBF1	Nucleophosmin OS=Cricetulus griseus GN=I79_020971 PE=4 SV=1 - [G3IBF1_CRIGR]	969.72	0.325	1	3	7	39	280	31	4.67
G3I4Z7	Galectin OS=Cricetulus griseus GN=I79_018538 PE=4 SV=1 - [G3I4Z7_CRIGR]	790.32	0.4815	1	6	6	39	135	14.8	5.8
G3GUV3	Macrophage metalloelastase OS=Cricetulus griseus GN=I79_001477 PE=4 SV=1 - [G3GUV3_CRIGR]	475.51	0.1185	1	4	4	39	464	53.3	9.35
G3GUV2	Collagenase 3 OS=Cricetulus griseus GN=I79_001476 PE=4 SV=1 - [G3GUV2_CRIGR]	1079.69	0.25	1	7	8	39	300	33.8	5.2
P19803	Rho GDP-dissociation inhibitor 1 OS=Bos taurus GN=ARHGDIA PE=1 SV=3 - [GDIR1_BOVIN]	1011.11	0.4608	1	1	7	38	204	23.4	5.2
Q58DU5	Proteasome subunit alpha type-3 OS=Bos taurus GN=PSMA3 PE=1 SV=3 - [PSA3_BOVIN]	662.53	0.4196	1	1	9	38	255	28.4	5.33
A2VE99	Septin-11 OS=Bos taurus GN=SEPT11 PE=2 SV=1 - [SEP11_BOVIN]	742.79	0.2188	5	3	8	38	425	49	6.81
G3HX84	Gelsolin OS=Cricetulus griseus GN=I79_015603 PE=4 SV=1 - [G3HX84_CRIGR]	850.27	0.2067	1	5	9	38	658	72	6.32
G3GT05	T-complex protein 1 subunit theta OS=Cricetulus griseus GN=I79_000778 PE=3 SV=1 - [G3GT05_CRIGR]	1485.27	0.4488	1	1	7	38	205	22.2	4.91
G3GRE1	Bifunctional aminoacyl-tRNA synthetase (Fragment) OS=Cricetulus griseus GN=I79_000086 PE=3 SV=1 - [G3GRE1_CRIGR]	433.98	0.1212	3	15	15	38	1378	154.8	7.06
G3HLV6	ATP-citrate synthase OS=Cricetulus griseus GN=I79_011700 PE=4 SV=1 - [G3HLV6_CRIGR]	609.15	0.2453	3	2	14	38	697	77.1	6.46
G3GT06	T-complex protein 1 subunit theta OS=Cricetulus griseus GN=I79_000779 PE=4 SV=1 - [G3GT06_CRIGR]	712.47	0.4043	1	3	7	38	230	24.8	5.29
G3GTX3	Suppressor of tumorigenicity 14 protein homolog OS=Cricetulus griseus GN=I79_001113 PE=3 SV=1 - [G3GTX3_CRIGR]	985.89	0.1221	2	9	9	38	827	92	6.55
G3HH30	Aldose reductase OS=Cricetulus griseus GN=I79_009926 PE=4 SV=1 - [G3HH30_CRIGR]	569.21	0.3038	1	8	9	37	316	35.8	7.4
G3IF80	Nucleolin OS=Cricetulus griseus GN=I79_022400 PE=4 SV=1 - [G3IF80_CRIGR]	905.98	0.1482	2	9	9	37	479	52.4	4.5
G3I2T9	3-phosphoinositide-dependent protein kinase 1 OS=Cricetulus griseus GN=I79_017733 PE=4 SV=1 - [G3I2T9_CRIGR]	729.94	0.1427	1	9	9	37	799	89.5	6.07
G3IFK8	MAM domain-containing protein 2 OS=Cricetulus griseus GN=I79_022531 PE=4 SV=1 - [G3IFK8_CRIGR]	530.75	0.2196	1	10	10	37	469	53.3	5.68
G3HZY1	RuvB-like 2 OS=Cricetulus griseus GN=I79_016646 PE=4 SV=1 - [G3HZY1_CRIGR]	616.14	0.2722	2	10	12	37	518	57.2	6.42
G3GSK4	Serine/threonine-protein kinase PAK 2 OS=Cricetulus griseus GN=I79_000619 PE=4 SV=1 - [G3GSK4_CRIGR]	735.6	0.3073	3	10	10	37	524	57.9	5.77
G3HRQ4	Myosin light polypeptide 6 OS=Cricetulus griseus GN=I79_013501 PE=4 SV=1 - [G3HRQ4_CRIGR]	762.73	0.6623	8	8	8	36	151	16.9	4.65
Q2HJ60	Heterogeneous nuclear ribonucleoproteins A2/B1 OS=Bos taurus GN=HNRNPA2B1 PE=2 SV=1 - [ROA2_BOVIN]	665.12	0.346	2	11	12	36	341	36	8.65
P00978	Protein AMBP OS=Bos taurus GN=AMBP PE=1 SV=2 - [AMBP_BOVIN]	554.45	0.2585	1	8	8	36	352	39.2	7.62
G3HJQ8	Integrin alpha-3 OS=Cricetulus griseus GN=I79_010907 PE=3 SV=1 - [G3HJQ8_CRIGR]	664.28	0.137	1	7	11	36	1051	116.4	6.4
G3HQ45	Eukaryotic translation initiation factor 2 subunit 3 OS=Cricetulus griseus GN=I79_012939 PE=4 SV=1 - [G3HQ45_CRIGR]	922.93	0.2373	2	9	9	36	472	51.1	8.4
G3I2H0	Dipeptidyl-peptidase 3 OS=Cricetulus griseus GN=I79_017576 PE=4 SV=1 - [G3I2H0_CRIGR]	1051.11	0.2493	1	11	11	36	738	82.9	5.22
G3HFY9	Ubiquitin-conjugating enzyme E2 L3 OS=Cricetulus griseus GN=I79_009507 PE=3 SV=1 - [G3HFY9_CRIGR]	614.78	0.474	2	5	5	36	154	17.8	8.22
G3HN77	Polyadenylate-binding protein 4 OS=Cricetulus griseus GN=I79_012213 PE=4 SV=1 - [G3HN77_CRIGR]	903.78	0.1679	3	1	8	36	524	57.9	9.23
Q2YDE4	Proteasome subunit alpha type-6 OS=Bos taurus GN=PSMA6 PE=1 SV=1 - [PSA6_BOVIN]	713.36	0.3211	2	8	8	35	246	27.4	6.76
Q5E987	Proteasome subunit alpha type-5 OS=Bos taurus GN=PSMA5 PE=1 SV=1 - [PSA5_BOVIN]	778.37	0.4191	2	7	7	35	241	26.4	4.79
P09867	Heterogeneous nuclear ribonucleoprotein A1 OS=Bos taurus GN=HNRNPA1 PE=1 SV=2 - [ROA1_BOVIN]	747.57	0.4063	3	11	12	35	320	34.2	9.23
G3HQM6	Endoplasmin OS=Cricetulus griseus GN=I79_013131 PE=3 SV=1 - [G3HQM6_CRIGR]	690.12	0.1233	2	9	11	35	803	92.6	4.82
G3INC5	Cathepsin L1 OS=Cricetulus griseus GN=I79_025440 PE=3 SV=1 - [G3INC5_CRIGR]	787.65	0.2793	1	7	7	35	333	37.2	7.17
G3I0M2	Platelet-activating factor acetylhydrolase IB subunit gamma OS=Cricetulus griseus GN=I79_016910 PE=4 SV=1 - [G3I0M2_CRIGR]	715.59	0.2763	2	5	5	35	228	25.5	8.63
G3HC39	Farnesyl pyrophosphate synthetase OS=Cricetulus griseus GN=I79_007989 PE=3 SV=1 - [G3HC39_CRIGR]	692.87	0.1147	2	4	4	35	375	43.2	7.81
Q3T0K1	Calumenin OS=Bos taurus GN=CALU PE=2 SV=1 - [CALU_BOVIN]	626.65	0.3175	2	1	8	34	315	37.1	4.59
Q8SPJ1	Junction plakoglobin OS=Bos taurus GN=JUP PE=2 SV=1 - [PLAK_BOVIN]	586.94	0.2336	2	9	13	34	745	81.8	6.14
Q9TRY0	Peptidyl-prolyl cis-trans isomerase FKBP4 OS=Bos taurus GN=FKBP4 PE=1 SV=4 - [FKBP4_BOVIN]	525.23	0.1786	1	1	7	34	459	51.5	5.39
G3HX39	Phosphoglycerate kinase OS=Cricetulus griseus GN=I79_015556 PE=3 SV=1 - [G3HX39_CRIGR]	507.2	0.4	1	1	8	34	195	21	6.4
G3I9G7	Proteasome subunit alpha type OS=Cricetulus griseus GN=I79_020214 PE=3 SV=1 - [G3I9G7_CRIGR]	560.41	0.368	1	1	9	34	269	29.4	6.8
G3IPN2	Keratin, type I cytoskeletal 10 (Fragment) OS=Cricetulus griseus GN=I79_025951 PE=3 SV=1 - [G3IPN2_CRIGR]	975.09	0.2058	8	2	6	34	243	27.8	4.49
G3HDR3	T-complex protein 1 subunit delta OS=Cricetulus griseus GN=I79_008649 PE=4 SV=1 - [G3HDR3_CRIGR]	765.55	0.267	1	1	7	34	397	42.1	8.27
Q3T169	40S ribosomal protein S3 OS=Bos taurus GN=RPS3 PE=2 SV=1 - [RS3_BOVIN]	763.94	0.4444	1	4	8	33	243	26.7	9.66
G3GYR9	40S ribosomal protein S8 OS=Cricetulus griseus GN=I79_002981 PE=3 SV=1 - [G3GYR9_CRIGR]	892.09	0.399	2	7	7	33	208	24.2	10.32
Q2KJE5	Glyceraldehyde-3-phosphate dehydrogenase, testis-specific OS=Bos taurus GN=GAPDHS PE=2 SV=1 - [G3PT_BOVIN]	542.81	0.0962	3	1	3	33	395	43.3	8.12
G3I8F9	Keratin, type I cytoskeletal 14 OS=Cricetulus griseus GN=I79_019828 PE=3 SV=1 - [G3I8F9_CRIGR]	658.84	0.1366	10	3	9	33	483	52.6	5.16
G3I3G8	Transaldolase OS=Cricetulus griseus GN=I79_017974 PE=3 SV=1 - [G3I3G8_CRIGR]	662.22	0.3531	3	12	12	33	337	37.5	7.03
G3I7P0	Dipeptidyl-peptidase 1 OS=Cricetulus griseus GN=I79_019536 PE=3 SV=1 - [G3I7P0_CRIGR]	756.12	0.1718	1	8	8	33	483	54.8	7.8
P86435	Neurosecretory protein VGF OS=Bos taurus GN=VGF PE=1 SV=2 - [VGF_BOVIN]	376.15	0.1036	1	7	7	33	618	67.6	4.88
Q08DA1	Sodium/potassium-transporting ATPase subunit alpha-1 OS=Bos taurus GN=ATP1A1 PE=2 SV=1 - [AT1A1_BOVIN]	766.29	0.097	7	7	7	33	1021	112.6	5.53
P62326	Thymosin beta-4 OS=Bos taurus GN=TMSB4 PE=1 SV=2 - [TYB4_BOVIN]	387.41	0.8636	1	4	4	32	44	5	5.06
A6QLG5	40S ribosomal protein S9 OS=Bos taurus GN=RPS9 PE=2 SV=1 - [RS9_BOVIN]	218.46	0.2113	3	7	7	32	194	22.6	10.65
P56701	26S proteasome non-ATPase regulatory subunit 2 OS=Bos taurus GN=PSMD2 PE=1 SV=2 - [PSMD2_BOVIN]	371.43	0.1244	2	5	9	32	908	100.2	5.2
G3HPZ5	Macrophage-capping protein OS=Cricetulus griseus GN=I79_012882 PE=4 SV=1 - [G3HPZ5_CRIGR]	999.01	0.3148	2	6	6	32	305	33.3	5.82
G3H9H7	Heterogeneous nuclear ribonucleoprotein G OS=Cricetulus griseus GN=I79_007049 PE=4 SV=1 - [G3H9H7_CRIGR]	352.35	0.1443	1	1	5	32	388	42.1	9.99
G3HRJ7	Catenin delta-1 OS=Cricetulus griseus GN=I79_013441 PE=4 SV=1 - [G3HRJ7_CRIGR]	376.55	0.1084	1	9	9	32	932	104	6.95
G3HNK4	Dihydropyrimidinase-related protein 2 OS=Cricetulus griseus GN=I79_012342 PE=4 SV=1 - [G3HNK4_CRIGR]	1094.44	0.3566	3	12	12	32	572	62.2	6.38
G3GWE9	Solute carrier family 2, facilitated glucose transporter member 9 OS=Cricetulus griseus GN=I79_002071 PE=3 SV=1 - [G3GWE9_CRIGR]	419.15	0.1036	1	1	8	32	994	108.9	8.05
G3HR08	Cytosol aminopeptidase OS=Cricetulus griseus GN=I79_013268 PE=3 SV=1 - [G3HR08_CRIGR]	1002.69	0.355	3	11	11	32	462	50.2	6.87
G3I873	Ubiquitin thioesterase OTUB1 OS=Cricetulus griseus GN=I79_019736 PE=4 SV=1 - [G3I873_CRIGR]	907.34	0.2739	2	6	6	32	241	28	5.29
G3H1U2	Heterogeneous nuclear ribonucleoprotein A3 OS=Cricetulus griseus GN=I79_004125 PE=4 SV=1 - [G3H1U2_CRIGR]	645.86	0.3448	3	6	8	32	261	26.9	8.84
P40673	High mobility group protein B2 OS=Bos taurus GN=HMGB2 PE=1 SV=3 - [HMGB2_BOVIN]	380.57	0.3014	8	8	10	31	209	24	7.81
A0JN52	Splicing factor 3B subunit 3 OS=Bos taurus GN=SF3B3 PE=2 SV=1 - [SF3B3_BOVIN]	764.06	0.1002	2	9	9	31	1217	135.5	5.26
Q58DT1	60S ribosomal protein L7 OS=Bos taurus GN=RPL7 PE=2 SV=1 - [RL7_BOVIN]	269.55	0.3347	4	3	8	31	248	29.2	10.68
A7E3Q8	Plastin-3 OS=Bos taurus GN=PLS3 PE=2 SV=1 - [PLST_BOVIN]	268.96	0.2381	4	3	12	31	630	70.8	5.6
Q17QG2	Nuclear migration protein nudC OS=Bos taurus GN=NUDC PE=2 SV=1 - [NUDC_BOVIN]	207.2	0.2078	3	1	6	31	332	38.2	5.31
A1A4J1	ATP-dependent 6-phosphofructokinase, liver type OS=Bos taurus GN=PFKL PE=2 SV=1 - [PFKAL_BOVIN]	659.33	0.1192	3	1	7	31	780	85.2	7.36
G3HW36	Serine hydroxymethyltransferase OS=Cricetulus griseus GN=I79_015184 PE=1 SV=1 - [G3HW36_CRIGR]	545.42	0.1687	3	6	7	31	504	55.9	8.4
G3GY52	Phosphoribosylformylglycinamidine synthase OS=Cricetulus griseus GN=I79_002708 PE=4 SV=1 - [G3GY52_CRIGR]	496.57	0.0919	1	10	10	31	1338	144.6	5.63
G3HJS0	Spectrin beta chain, brain 1 OS=Cricetulus griseus GN=I79_010919 PE=4 SV=1 - [G3HJS0_CRIGR]	712.98	0.1304	1	14	14	31	1426	166.2	5.59
P50291	Follistatin OS=Bos taurus GN=FST PE=2 SV=2 - [FST_BOVIN]	741.25	0.1977	1	1	6	31	344	37.9	6.07
G3IC99	Septin-11 OS=Cricetulus griseus GN=I79_021290 PE=3 SV=1 - [G3IC99_CRIGR]	568.21	0.1625	5	1	6	31	437	50.3	7.36
G3I8W3	Ephrin type-B receptor 3 OS=Cricetulus griseus GN=I79_019995 PE=4 SV=1 - [G3I8W3_CRIGR]	260.6	0.1495	9	11	12	31	930	102.9	6.93
G3H1M4	Eukaryotic translation initiation factor 2 subunit 1 OS=Cricetulus griseus GN=I79_004073 PE=4 SV=1 - [G3H1M4_CRIGR]	573.22	0.3683	2	11	11	31	315	36.1	5.14
G3H3H9	Aminopeptidase B OS=Cricetulus griseus GN=I79_004826 PE=4 SV=1 - [G3H3H9_CRIGR]	336.22	0.1523	1	7	7	31	650	72.9	5.83
G3GZ90	Calumenin OS=Cricetulus griseus GN=I79_003123 PE=4 SV=1 - [G3GZ90_CRIGR]	497.83	0.1232	2	1	8	31	763	87.9	5.39
Q3SZV3	Elongation factor 1-gamma OS=Bos taurus GN=EEF1G PE=2 SV=1 - [EF1G_BOVIN]	560.16	0.1864	4	5	7	30	440	50.3	6.57
G3HBP8	40S ribosomal protein S2 OS=Cricetulus griseus GN=I79_007954 PE=3 SV=1 - [G3HBP8_CRIGR]	207.66	0.2457	17	6	6	30	293	31.2	10.24
G3I5V6	Mitotic checkpoint protein BUB3 OS=Cricetulus griseus GN=I79_018864 PE=4 SV=1 - [G3I5V6_CRIGR]	602.79	0.2006	3	6	6	30	324	36.7	6.84
G3HDS3	Histone H2A OS=Cricetulus griseus GN=I79_008689 PE=3 SV=1 - [G3HDS3_CRIGR]	496.14	0.3178	12	1	7	30	236	26.7	10.92
G3IBY4	Plastin-3 OS=Cricetulus griseus GN=I79_021170 PE=4 SV=1 - [G3IBY4_CRIGR]	339.32	0.2804	4	2	11	30	460	51.9	6.14
G3HP50	CUB domain-containing protein 1 OS=Cricetulus griseus GN=I79_012554 PE=4 SV=1 - [G3HP50_CRIGR]	205.64	0.0912	1	7	7	30	833	92.6	7.84
G3H8W5	6-phosphofructokinase OS=Cricetulus griseus GN=I79_006852 PE=3 SV=1 - [G3H8W5_CRIGR]	756.19	0.1718	1	3	9	30	745	81.5	7.42
Q3ZBA6	DnaJ homolog subfamily B member 11 OS=Bos taurus GN=DNAJB11 PE=2 SV=1 - [DJB11_BOVIN]	1124.43	0.1872	2	5	5	30	358	40.5	6.32
G3GVB5	Ras-related C3 botulinum toxin substrate 1 OS=Cricetulus griseus GN=I79_001650 PE=3 SV=1 - [G3GVB5_CRIGR]	396.78	0.4324	5	7	7	29	148	16.8	8.91
G3HV39	Poly(RC)-binding protein 2 OS=Cricetulus griseus GN=I79_014816 PE=4 SV=1 - [G3HV39_CRIGR]	957.25	0.2182	9	3	6	29	362	38.2	6.79
G3IG23	Alanyl-tRNA synthetase, cytoplasmic OS=Cricetulus griseus GN=I79_022700 PE=3 SV=1 - [G3IG23_CRIGR]	691.33	0.1095	1	7	7	29	968	106.8	5.62
G3GZL3	Roquin OS=Cricetulus griseus GN=I79_003298 PE=3 SV=1 - [G3GZL3_CRIGR]	359.81	0.0381	1	1	6	29	1418	158.5	7.47
G3I1H5	Legumain OS=Cricetulus griseus GN=I79_017232 PE=4 SV=1 - [G3I1H5_CRIGR]	408.78	0.2511	1	9	9	29	438	49.6	6.55
G3GR86	6-phosphofructokinase OS=Cricetulus griseus GN=I79_000029 PE=3 SV=1 - [G3GR86_CRIGR]	708.08	0.087	1	3	6	29	793	86.2	7.09
P11017	Guanine nucleotide-binding protein G(I)/G(S)/G(T) subunit beta-2 OS=Bos taurus GN=GNB2 PE=2 SV=3 - [GBB2_BOVIN]	569.89	0.2824	12	4	8	28	340	37.3	6
Q6B855	Transketolase OS=Bos taurus GN=TKT PE=2 SV=1 - [TKT_BOVIN]	658.5	0.1429	1	2	7	28	623	67.9	7.65
Q2HJ33	Obg-like ATPase 1 OS=Bos taurus GN=OLA1 PE=2 SV=1 - [OLA1_BOVIN]	291.27	0.25	2	8	8	28	396	44.7	7.81
G3GWF4	Heat shock protein 105 kDa (Fragment) OS=Cricetulus griseus GN=I79_002075 PE=3 SV=1 - [G3GWF4_CRIGR]	402.62	0.0771	2	2	5	28	778	87.9	5.85
G3IE21	Aldose reductase-related protein 2 OS=Cricetulus griseus GN=I79_021963 PE=4 SV=1 - [G3IE21_CRIGR]	574.57	0.3323	1	6	8	28	316	36.3	6.68
G3I310	26S proteasome non-ATPase regulatory subunit 2 OS=Cricetulus griseus GN=I79_017809 PE=4 SV=1 - [G3I310_CRIGR]	610.27	0.1689	1	5	9	28	657	72.9	4.87
G3GSP0	Uridine 5'-monophosphate synthase OS=Cricetulus griseus GN=I79_000657 PE=3 SV=1 - [G3GSP0_CRIGR]	334.47	0.2417	2	12	12	28	480	52.2	6.9
G3GRT0	Adenine phosphoribosyltransferase OS=Cricetulus griseus GN=I79_000224 PE=3 SV=1 - [G3GRT0_CRIGR]	738.47	0.4115	1	6	6	28	192	20.8	5.92
P62871	Guanine nucleotide-binding protein G(I)/G(S)/G(T) subunit beta-1 OS=Bos taurus GN=GNB1 PE=1 SV=3 - [GBB1_BOVIN]	600.8	0.2824	11	3	7	27	340	37.4	6
A2I7N3	Serpin A3-7 OS=Bos taurus GN=SERPINA3-7 PE=3 SV=1 - [SPA37_BOVIN]	343.04	0.2254	1	7	8	27	417	46.9	6.34
Q5E946	Protein DJ-1 OS=Bos taurus GN=PARK7 PE=2 SV=1 - [PARK7_BOVIN]	602.98	0.3069	1	3	5	27	189	20	7.33
A7MB16	Eukaryotic translation initiation factor 3 subunit B OS=Bos taurus GN=EIF3B PE=2 SV=1 - [EIF3B_BOVIN]	331.17	0.201	1	12	12	27	786	88.9	4.97
G3GZA9	Reticulocalbin-1 (Fragment) OS=Cricetulus griseus GN=I79_003169 PE=4 SV=1 - [G3GZA9_CRIGR]	423.76	0.2846	1	6	6	27	246	29.3	4.7
G3GUB8	Integrin alpha-6 OS=Cricetulus griseus GN=I79_001272 PE=3 SV=1 - [G3GUB8_CRIGR]	595.68	0.091	1	7	7	27	890	98.9	6.05
G3GRX4	Coactosin-like protein OS=Cricetulus griseus GN=I79_000269 PE=4 SV=1 - [G3GRX4_CRIGR]	391.52	0.507	2	5	6	27	142	15.9	5.4
G3HU51	Isocitrate dehydrogenase [NADP] OS=Cricetulus griseus GN=I79_014456 PE=3 SV=1 - [G3HU51_CRIGR]	254.84	0.1449	4	1	6	27	414	46.7	6.99
G3GTK5	Proprotein convertase subtilisin/kexin type 9 OS=Cricetulus griseus GN=I79_000990 PE=4 SV=1 - [G3GTK5_CRIGR]	567.87	0.1143	1	8	8	27	691	74.1	6.96
G3HGW7	40S ribosomal protein S21 OS=Cricetulus griseus GN=I79_009859 PE=3 SV=1 - [G3HGW7_CRIGR]	351.03	0.5904	4	4	4	27	83	9.1	8.32
G3HMM2	Peptidyl-prolyl cis-trans isomerase OS=Cricetulus griseus GN=I79_011990 PE=3 SV=1 - [G3HMM2_CRIGR]	480.71	0.3364	1	2	6	27	220	24	5.97
G3H2G5	Serine/threonine-protein phosphatase 2A 65 kDa regulatory subunit A beta isoform OS=Cricetulus griseus GN=I79_004378 PE=4 SV=1 - [G3H2G5_CRIGR]	929.96	0.1148	1	4	6	27	601	65.9	5.1
Q3T0R1	40S ribosomal protein S18 OS=Bos taurus GN=RPS18 PE=2 SV=3 - [RS18_BOVIN]	521.86	0.4145	5	6	6	26	152	17.7	10.99
P62992	Ubiquitin-40S ribosomal protein S27a OS=Bos taurus GN=RPS27A PE=1 SV=2 - [RS27A_BOVIN]	497.58	0.4615	6	6	6	26	156	18	9.64
G3IEK1	Actin-related protein 2/3 complex subunit 2 OS=Cricetulus griseus GN=I79_022148 PE=4 SV=1 - [G3IEK1_CRIGR]	288.96	0.2067	2	7	7	26	300	34.3	7.36
Q32PJ2	Apolipoprotein A-IV OS=Bos taurus GN=APOA4 PE=2 SV=1 - [APOA4_BOVIN]	318.75	0.3526	2	10	10	26	380	43	5.4
Q6Q137	Septin-7 OS=Bos taurus GN=SEPT7 PE=2 SV=2 - [SEPT7_BOVIN]	621.67	0.1487	1	2	5	26	437	50.6	8.63
Q5E9J1	Heterogeneous nuclear ribonucleoprotein F OS=Bos taurus GN=HNRNPF PE=2 SV=3 - [HNRPF_BOVIN]	477.05	0.215	1	3	6	26	414	45.7	5.49
Q3T160	Nucleophosmin OS=Bos taurus GN=NPM1 PE=2 SV=1 - [NPM_BOVIN]	616.6	0.2687	1	1	5	26	294	32.7	4.77
Q28141	ATP-dependent RNA helicase A OS=Bos taurus GN=DHX9 PE=2 SV=1 - [DHX9_BOVIN]	492.77	0.0824	1	9	9	26	1287	141.9	6.89
G3GZ85	Nuclease domain-containing protein 1 OS=Cricetulus griseus GN=I79_003116 PE=4 SV=1 - [G3GZ85_CRIGR]	790.01	0.0621	2	5	5	26	886	99.7	6.96
G3GTB7	Heterogeneous nuclear ribonucleoprotein Q OS=Cricetulus griseus GN=I79_000895 PE=4 SV=1 - [G3GTB7_CRIGR]	463.79	0.1762	2	9	9	26	562	62.6	7.56
G3IEU2	Protein DJ-1 OS=Cricetulus griseus GN=I79_022246 PE=4 SV=1 - [G3IEU2_CRIGR]	645.26	0.2804	1	3	5	26	189	19.9	6.79
G3I863	Ephrin type-A receptor 2 OS=Cricetulus griseus GN=I79_019726 PE=4 SV=1 - [G3I863_CRIGR]	356.25	0.1019	9	8	9	26	942	105.2	6.47
G3I5N6	Insulin-like growth factor-binding protein 4 OS=Cricetulus griseus GN=I79_018789 PE=4 SV=1 - [G3I5N6_CRIGR]	622.66	0.2165	2	5	5	26	254	27.7	7.14
G3H8Y8	Collagen alpha-1(XVIII) chain OS=Cricetulus griseus GN=I79_006837 PE=4 SV=1 - [G3H8Y8_CRIGR]	786.77	0.0883	1	7	7	26	883	95.5	6.33
G3IKS9	Glutaredoxin-3 OS=Cricetulus griseus GN=I79_024482 PE=4 SV=1 - [G3IKS9_CRIGR]	649.02	0.2199	2	7	7	26	332	37.6	5.39
G3H1D5	Retinoid-inducible serine carboxypeptidase OS=Cricetulus griseus GN=I79_003960 PE=4 SV=1 - [G3H1D5_CRIGR]	772.65	0.1802	1	6	6	26	455	51.2	5.5
G3GWR8	Proteasome subunit alpha type-7 (Fragment) OS=Cricetulus griseus GN=I79_002199 PE=4 SV=1 - [G3GWR8_CRIGR]	670.36	0.5425	1	1	8	26	212	23.8	8.48
G3I692	Cytosolic non-specific dipeptidase OS=Cricetulus griseus GN=I79_019004 PE=4 SV=1 - [G3I692_CRIGR]	507.81	0.2589	2	7	7	26	475	52.8	5.94
G3H559	Alpha-mannosidase 2 OS=Cricetulus griseus GN=I79_005430 PE=4 SV=1 - [G3H559_CRIGR]	535.9	0.1192	1	11	11	26	1099	125.3	7.55
G3ILV6	Rab GDP dissociation inhibitor beta OS=Cricetulus griseus GN=I79_024878 PE=4 SV=1 - [G3ILV6_CRIGR]	541.24	0.7727	1	1	8	26	110	12.6	4.73
G3HUM5	SUMO-activating enzyme subunit 2 OS=Cricetulus griseus GN=I79_014638 PE=3 SV=1 - [G3HUM5_CRIGR]	383.11	0.0752	1	3	4	26	824	91.8	5.54
Q3ZBX9	Histone H2A.J OS=Bos taurus GN=H2AFJ PE=2 SV=1 - [H2AJ_BOVIN]	511.16	0.6512	4	1	6	25	129	14	10.9
P56652	Inter-alpha-trypsin inhibitor heavy chain H3 OS=Bos taurus GN=ITIH3 PE=1 SV=2 - [ITIH3_BOVIN]	198.69	0.0898	1	7	7	25	891	99.5	5.9
Q3ZBG0	Proteasome subunit alpha type-7 OS=Bos taurus GN=PSMA7 PE=1 SV=1 - [PSA7_BOVIN]	473.28	0.496	1	1	8	25	248	27.9	8.46
Q1LZH9	N-acetylglucosamine-6-sulfatase OS=Bos taurus GN=GNS PE=2 SV=1 - [GNS_BOVIN]	610.44	0.1339	1	1	8	25	560	62.7	8.43
G3HDZ7	Integrin alpha-1 (Fragment) OS=Cricetulus griseus GN=I79_008766 PE=3 SV=1 - [G3HDZ7_CRIGR]	435.93	0.034	2	6	6	25	1854	204.1	5.58
G3I8P7	N-acetylglucosamine-6-sulfatase OS=Cricetulus griseus GN=I79_019923 PE=3 SV=1 - [G3I8P7_CRIGR]	555.17	0.2489	1	3	10	25	474	53.7	6.87
G3I6P1	Glyceraldehyde-3-phosphate dehydrogenase OS=Cricetulus griseus GN=I79_019168 PE=3 SV=1 - [G3I6P1_CRIGR]	640.87	0.1623	6	1	5	25	345	36.9	7.77
G3H4V1	Septin-2 OS=Cricetulus griseus GN=I79_005314 PE=3 SV=1 - [G3H4V1_CRIGR]	738.62	0.3832	2	8	8	25	321	37.1	6.18
G3IB71	Glutaminyl-tRNA synthetase OS=Cricetulus griseus GN=I79_020861 PE=3 SV=1 - [G3IB71_CRIGR]	403	0.1058	1	4	6	25	775	87.7	7.15
G3HTJ2	Septin-7 (Fragment) OS=Cricetulus griseus GN=I79_014218 PE=3 SV=1 - [G3HTJ2_CRIGR]	552.31	0.1582	1	1	4	25	354	41.2	8.6
G3IJD1	Putative ATP-dependent RNA helicase DDX17 OS=Cricetulus griseus GN=I79_023964 PE=3 SV=1 - [G3IJD1_CRIGR]	614.69	0.092	1	1	5	25	652	72.6	8.68
G3H576	Annexin OS=Cricetulus griseus GN=I79_005451 PE=3 SV=1 - [G3H576_CRIGR]	503.41	0.1065	1	3	6	25	676	76.4	5.59
G3H902	Prostaglandin F2 receptor negative regulator OS=Cricetulus griseus GN=I79_006863 PE=4 SV=1 - [G3H902_CRIGR]	445.5	0.1446	1	10	10	25	830	93.7	6.58
G3HLZ2	Proteasome activator complex subunit 3 OS=Cricetulus griseus GN=I79_011736 PE=4 SV=1 - [G3HLZ2_CRIGR]	594.62	0.2756	2	7	7	24	254	29.5	5.95
G3HCT4	Putative ATP-dependent RNA helicase DDX5 OS=Cricetulus griseus GN=I79_008300 PE=3 SV=1 - [G3HCT4_CRIGR]	391.63	0.0862	1	1	5	24	615	69.2	8.92
P01966	Hemoglobin subunit alpha OS=Bos taurus GN=HBA PE=1 SV=2 - [HBA_BOVIN]	326.51	0.3239	1	3	3	24	142	15.2	8.44
Q9XSG3	Isocitrate dehydrogenase [NADP] cytoplasmic OS=Bos taurus GN=IDH1 PE=2 SV=1 - [IDHC_BOVIN]	408.67	0.2029	2	2	7	24	414	46.8	6.55
G3HP24	Isoleucyl-tRNA synthetase, cytoplasmic OS=Cricetulus griseus GN=I79_012527 PE=3 SV=1 - [G3HP24_CRIGR]	155.96	0.0571	1	6	6	24	1262	144	6.47
G3HRD9	Proteasome subunit beta type OS=Cricetulus griseus GN=I79_013406 PE=3 SV=1 - [G3HRD9_CRIGR]	859.27	0.3156	2	7	7	24	263	28.7	7.02
G3HX34	60S ribosomal protein L7 OS=Cricetulus griseus GN=I79_015550 PE=4 SV=1 - [G3HX34_CRIGR]	295.04	0.3007	3	1	5	24	143	17	11.34
G3H3E6	Metalloproteinase inhibitor 2 OS=Cricetulus griseus GN=I79_004761 PE=4 SV=1 - [G3H3E6_CRIGR]	240.54	0.3246	2	5	5	24	191	21.5	7.52
G3GRM2	Disintegrin and metalloproteinase domain-containing protein 10 OS=Cricetulus griseus GN=I79_000174 PE=3 SV=1 - [G3GRM2_CRIGR]	538.51	0.2089	2	10	10	24	675	75.5	7.53
G3I2Y1	Aspartate aminotransferase OS=Cricetulus griseus GN=I79_017779 PE=3 SV=1 - [G3I2Y1_CRIGR]	523.81	0.1977	2	6	6	24	430	47.4	9
G3I7K9	Collagen alpha-1(IV) chain OS=Cricetulus griseus GN=I79_019500 PE=4 SV=1 - [G3I7K9_CRIGR]	230.95	0.0248	2	4	4	24	1614	160.8	7.68
G3I5A4	Annexin OS=Cricetulus griseus GN=I79_018648 PE=3 SV=1 - [G3I5A4_CRIGR]	407.41	0.2212	2	6	6	24	321	36	5.05
G3HIY9	Glutamate--cysteine ligase catalytic subunit OS=Cricetulus griseus GN=I79_010621 PE=4 SV=1 - [G3HIY9_CRIGR]	615.18	0.0788	1	4	4	24	584	66.4	5.52
G3GU76	60S acidic ribosomal protein P0 OS=Cricetulus griseus GN=I79_001228 PE=3 SV=1 - [G3GU76_CRIGR]	428.3	0.2904	5	6	6	24	272	29.9	8.51
G3H2T4	Histone H2B OS=Cricetulus griseus GN=I79_004536 PE=3 SV=1 - [G3H2T4_CRIGR]	507.99	0.3254	13	5	5	23	126	13.9	10.32
Q3T0E7	Serine/threonine-protein phosphatase PP1-alpha catalytic subunit OS=Bos taurus GN=PPP1CA PE=2 SV=1 - [PP1A_BOVIN]	442.08	0.3515	2	4	9	23	330	37.5	6.33
Q2KIS7	Tetranectin OS=Bos taurus GN=CLEC3B PE=2 SV=1 - [TETN_BOVIN]	525.34	0.3317	2	5	5	23	202	22.1	5.64
P38657	Protein disulfide-isomerase A3 OS=Bos taurus GN=PDIA3 PE=2 SV=1 - [PDIA3_BOVIN]	462.03	0.1267	1	3	6	23	505	56.9	6.65
P33097	Aspartate aminotransferase, cytoplasmic OS=Bos taurus GN=GOT1 PE=1 SV=3 - [AATC_BOVIN]	246.94	0.1477	1	3	6	23	413	46.4	7.49
Q2KJ25	26S proteasome non-ATPase regulatory subunit 12 OS=Bos taurus GN=PSMD12 PE=2 SV=3 - [PSD12_BOVIN]	271.25	0.0855	3	4	4	23	456	53	7.36
G3HAP7	Glutathione synthetase OS=Cricetulus griseus GN=I79_007504 PE=4 SV=1 - [G3HAP7_CRIGR]	545.41	0.1688	14	7	8	23	474	52.2	5.57
G3GRR8	60S ribosomal protein L13 OS=Cricetulus griseus GN=I79_000212 PE=3 SV=1 - [G3GRR8_CRIGR]	301.05	0.2268	2	5	5	23	194	22.4	11.78
G3HEQ3	Ran-specific GTPase-activating protein OS=Cricetulus griseus GN=I79_009045 PE=4 SV=1 - [G3HEQ3_CRIGR]	405.16	0.35	2	6	6	23	220	25.2	5.16
G3HKN1	Protein SET OS=Cricetulus griseus GN=I79_011260 PE=3 SV=1 - [G3HKN1_CRIGR]	470.63	0.1474	9	5	5	23	380	44.2	4.08
G3HTG9	Glyoxalase domain-containing protein 4 OS=Cricetulus griseus GN=I79_014194 PE=4 SV=1 - [G3HTG9_CRIGR]	250.73	0.2248	1	6	6	23	298	33.2	5.47
G3HI96	Coronin OS=Cricetulus griseus GN=I79_010363 PE=3 SV=1 - [G3HI96_CRIGR]	412	0.1097	1	5	5	23	474	53.1	7.09
G3I412	45 kDa calcium-binding protein OS=Cricetulus griseus GN=I79_018191 PE=4 SV=1 - [G3I412_CRIGR]	355.52	0.2817	2	6	6	23	355	41.2	4.89
G3H6S8	Inorganic pyrophosphatase OS=Cricetulus griseus GN=I79_006047 PE=4 SV=1 - [G3H6S8_CRIGR]	661.23	0.2857	1	2	6	23	329	37	5.34
G3GVT2	Far upstream element-binding protein 1 OS=Cricetulus griseus GN=I79_001831 PE=4 SV=1 - [G3GVT2_CRIGR]	280.65	0.1715	2	7	7	23	449	47.7	8.48
Q2KJI3	Protein FAM49B OS=Bos taurus GN=FAM49B PE=2 SV=1 - [FA49B_BOVIN]	678.23	0.2469	4	5	5	22	324	36.7	6.06
Q0VCX5	Eukaryotic peptide chain release factor subunit 1 OS=Bos taurus GN=ETF1 PE=2 SV=3 - [ERF1_BOVIN]	427.1	0.2197	2	7	7	22	437	49	5.71
G3HVB8	Platelet-activating factor acetylhydrolase IB subunit alpha OS=Cricetulus griseus GN=Pafah1b1 PE=3 SV=1 - [G3HVB8_CRIGR]	323.72	0.2122	2	6	7	22	410	46.6	7.37
P01030	Complement C4 (Fragments) OS=Bos taurus GN=C4 PE=1 SV=2 - [CO4_BOVIN]	304.57	0.1033	1	7	7	22	920	101.8	6.58
Q9TT36	Thyroxine-binding globulin OS=Bos taurus GN=SERPINA7 PE=2 SV=1 - [THBG_BOVIN]	553.13	0.2044	2	7	7	22	411	46	5.72
Q3SZH7	Leukotriene A-4 hydrolase OS=Bos taurus GN=LTA4H PE=2 SV=3 - [LKHA4_BOVIN]	554.65	0.1718	1	2	8	22	611	69.3	6.37
Q2KI42-2	Isoform 2 of 26S proteasome non-ATPase regulatory subunit 11 OS=Bos taurus GN=PSMD11 - [PSD11_BOVIN]	355.37	0.2202	3	7	7	22	377	42.4	6.89
Q2TBX6	Proteasome subunit beta type-1 OS=Bos taurus GN=PSMB1 PE=1 SV=1 - [PSB1_BOVIN]	509.61	0.4232	1	2	7	22	241	26.2	8.13
G3HUN1	Ubiquitin carboxyl-terminal hydrolase isozyme L5 OS=Cricetulus griseus GN=I79_014645 PE=4 SV=1 - [G3HUN1_CRIGR]	226.33	0.1824	2	6	6	22	329	37.6	5.41
G3IHT7	Semaphorin-4B OS=Cricetulus griseus GN=I79_023393 PE=4 SV=1 - [G3IHT7_CRIGR]	399.1	0.077	3	7	7	22	792	87.8	7.23
G3IFV3	Exportin-1 OS=Cricetulus griseus GN=I79_022627 PE=4 SV=1 - [G3IFV3_CRIGR]	279.9	0.1307	1	8	8	22	773	88.8	6.24
G3GZL7	Calcyclin-binding protein OS=Cricetulus griseus GN=I79_003304 PE=4 SV=1 - [G3GZL7_CRIGR]	289.73	0.1141	2	3	3	22	184	21.2	7.27
G3HPI0	40S ribosomal protein S4 OS=Cricetulus griseus GN=I79_012692 PE=3 SV=1 - [G3HPI0_CRIGR]	535.05	0.1489	5	4	4	22	262	29.2	10.27
G3HD42	Serpin B5 OS=Cricetulus griseus GN=I79_008416 PE=3 SV=1 - [G3HD42_CRIGR]	647.11	0.2453	1	7	7	22	375	42.1	6.1
G3IN86	Dipeptidyl-peptidase 2 OS=Cricetulus griseus GN=I79_025398 PE=4 SV=1 - [G3IN86_CRIGR]	329.96	0.081	1	4	4	22	506	56.4	6.54
G3I782	Heterogeneous nuclear ribonucleoprotein D0 OS=Cricetulus griseus GN=I79_019367 PE=4 SV=1 - [G3I782_CRIGR]	366.93	0.2529	3	5	6	22	257	29.3	9.31
G3GX55	Brain-specific angiogenesis inhibitor 1-associated protein 2 OS=Cricetulus griseus GN=I79_002368 PE=4 SV=1 - [G3GX55_CRIGR]	251.64	0.2486	2	10	10	22	555	61.2	8.84
G3HZX6	Nucleobindin-1 OS=Cricetulus griseus GN=I79_016639 PE=4 SV=1 - [G3HZX6_CRIGR]	375.59	0.3361	1	1	5	22	122	13.8	4.79
G3HNT9	Proteasome subunit beta type-1 OS=Cricetulus griseus GN=I79_012433 PE=4 SV=1 - [G3HNT9_CRIGR]	525.03	0.6	1	2	7	22	140	15.6	8.1
G3H5D5	Acyl-CoA-binding protein OS=Cricetulus griseus GN=I79_005522 PE=4 SV=1 - [G3H5D5_CRIGR]	300.37	0.2185	2	2	2	22	119	13.5	9.31
G3H697	Glucosidase 2 subunit beta OS=Cricetulus griseus GN=I79_005851 PE=4 SV=1 - [G3H697_CRIGR]	482.75	0.1313	2	6	6	22	556	62.3	4.48
G3H6C5	Hsp90 co-chaperone Cdc37 OS=Cricetulus griseus GN=I79_005880 PE=4 SV=1 - [G3H6C5_CRIGR]	349.4	0.2058	2	6	6	22	379	44.4	5.34
Q0P5D0	Peptidyl-prolyl cis-trans isomerase H OS=Bos taurus GN=PPIH PE=2 SV=1 - [PPIH_BOVIN]	368.48	0.1412	3	2	3	21	177	19.2	8.07
G3IDS4	Rho-related GTP-binding protein RhoC OS=Cricetulus griseus GN=I79_021857 PE=3 SV=1 - [G3IDS4_CRIGR]	467.89	0.3782	2	1	7	21	193	22	6.58
P67808	Nuclease-sensitive element-binding protein 1 OS=Bos taurus GN=YBX1 PE=2 SV=3 - [YBOX1_BOVIN]	807.48	0.2191	2	4	4	21	324	35.9	9.88
Q3SZ52	Ubiquitin-conjugating enzyme E2 variant 1 OS=Bos taurus GN=UBE2V1 PE=2 SV=1 - [UB2V1_BOVIN]	297.57	0.3469	2	3	5	21	147	16.5	7.93
G3H8F9	Transforming protein RhoA OS=Cricetulus griseus GN=I79_006659 PE=3 SV=1 - [G3H8F9_CRIGR]	468.15	0.4404	3	1	7	21	193	21.8	6.1
Q9TU03	Rho GDP-dissociation inhibitor 2 OS=Bos taurus GN=ARHGDIB PE=2 SV=3 - [GDIR2_BOVIN]	672.05	0.12	1	3	3	21	200	22.8	5.2
Q5E966	Eukaryotic translation initiation factor 3 subunit I OS=Bos taurus GN=EIF3I PE=2 SV=1 - [EIF3I_BOVIN]	331.63	0.2338	1	1	7	21	325	36.4	5.64
Q9XTA2	Prolyl endopeptidase OS=Bos taurus GN=PREP PE=2 SV=1 - [PPCE_BOVIN]	579.49	0.1085	1	4	6	21	710	80.6	5.9
G3HH37	CD109 antigen OS=Cricetulus griseus GN=I79_009933 PE=4 SV=1 - [G3HH37_CRIGR]	353.33	0.0388	1	6	6	21	1443	161.8	6.2
G3HGP4	Acetyl-CoA acetyltransferase, cytosolic OS=Cricetulus griseus GN=I79_009782 PE=3 SV=1 - [G3HGP4_CRIGR]	299.08	0.1033	1	3	3	21	397	41	7.27
G3HVQ0	FRAS1-related extracellular matrix protein 2 OS=Cricetulus griseus GN=I79_015040 PE=4 SV=1 - [G3HVQ0_CRIGR]	342.44	0.0416	1	11	11	21	3104	345.2	5.1
G3GU30	60S ribosomal protein L6 OS=Cricetulus griseus GN=I79_001178 PE=3 SV=1 - [G3GU30_CRIGR]	287.1	0.354	5	9	9	21	291	32.8	10.51
P12269	Inosine-5'-monophosphate dehydrogenase 2 OS=Cricetulus griseus GN=IMPDH2 PE=1 SV=1 - [IMDH2_CRIGR]	244.23	0.3463	2	10	10	21	514	55.9	7.27
G3HY08	Macrophage migration inhibitory factor OS=Cricetulus griseus GN=I79_015933 PE=4 SV=1 - [G3HY08_CRIGR]	529.72	0.2348	1	3	3	21	115	12.4	7.34
G3HAQ2	Eukaryotic translation initiation factor 6 OS=Cricetulus griseus GN=Eif6 PE=1 SV=1 - [G3HAQ2_CRIGR]	496.43	0.3673	2	5	5	21	245	26.6	4.74
G3IDU1	Zinc transporter ZIP10 OS=Cricetulus griseus GN=I79_021878 PE=4 SV=1 - [G3IDU1_CRIGR]	400.48	0.0278	1	2	2	21	791	89.2	6.7
G3GXA9	Protein disulfide-isomerase OS=Cricetulus griseus GN=I79_002399 PE=3 SV=1 - [G3GXA9_CRIGR]	211.15	0.3478	1	1	5	21	184	21.1	4.64
Q3T0X6	40S ribosomal protein S16 OS=Bos taurus GN=RPS16 PE=2 SV=3 - [RS16_BOVIN]	261.78	0.3767	3	7	7	20	146	16.4	10.21
Q3T148	Eukaryotic translation initiation factor 3 subunit M OS=Bos taurus GN=EIF3M PE=2 SV=2 - [EIF3M_BOVIN]	431.14	0.2547	2	6	6	20	373	42.4	5.63
O62768	Thioredoxin reductase 1, cytoplasmic OS=Bos taurus GN=TXNRD1 PE=2 SV=3 - [TRXR1_BOVIN]	744.02	0.1844	2	3	6	20	499	54.7	6.47
Q32LC7	Ras GTPase-activating protein-binding protein 1 OS=Bos taurus GN=G3BP PE=2 SV=1 - [G3BP1_BOVIN]	320.08	0.1763	4	5	6	20	465	52.1	5.52
G3I680	Tumor-associated calcium signal transducer 2 OS=Cricetulus griseus GN=I79_018992 PE=4 SV=1 - [G3I680_CRIGR]	421	0.1541	1	4	4	20	318	35.8	8.6
G3HCK9	Far upstream element-binding protein 2 OS=Cricetulus griseus GN=I79_008220 PE=4 SV=1 - [G3HCK9_CRIGR]	400.76	0.1366	1	6	6	20	593	62.2	7.72
G3HCL6	Complement C3 OS=Cricetulus griseus GN=I79_008227 PE=4 SV=1 - [G3HCL6_CRIGR]	254.82	0.0326	1	1	6	20	1626	182.1	6.73
G3IAG0	Xaa-Pro aminopeptidase 1 OS=Cricetulus griseus GN=I79_020582 PE=3 SV=1 - [G3IAG0_CRIGR]	522.2	0.1075	4	6	6	20	623	69.8	5.54
G3GVX2	Destrin OS=Cricetulus griseus GN=I79_001877 PE=4 SV=1 - [G3GVX2_CRIGR]	323.47	0.3273	2	5	5	20	165	18.6	7.69
G3H6K1	Heterogeneous nuclear ribonucleoprotein G OS=Cricetulus griseus GN=I79_005965 PE=4 SV=1 - [G3H6K1_CRIGR]	197.67	0.1458	1	1	5	20	384	41.7	9.2
G3HDS7	Histone H1.3 OS=Cricetulus griseus GN=I79_008693 PE=3 SV=1 - [G3HDS7_CRIGR]	372.02	0.1884	2	2	5	20	207	20.5	11.02
G3HP75	D-3-phosphoglycerate dehydrogenase OS=Cricetulus griseus GN=I79_012581 PE=3 SV=1 - [G3HP75_CRIGR]	494.6	0.1445	2	6	6	20	533	56.5	6.9
Q3MHH4	Glutamine--tRNA ligase OS=Bos taurus GN=QARS PE=2 SV=1 - [SYQ_BOVIN]	264.52	0.0723	1	3	5	20	775	87.6	6.89
G3HSH4	60S ribosomal protein L24 OS=Cricetulus griseus GN=I79_013806 PE=4 SV=1 - [G3HSH4_CRIGR]	271.3	0.1818	2	2	2	20	110	13	11.05
G3I8H3	Vacuolar protein sorting-associated protein 35 OS=Cricetulus griseus GN=I79_019847 PE=4 SV=1 - [G3I8H3_CRIGR]	442.35	0.0673	13	8	8	20	1427	159.5	5.24
G3HWP9	Heterogeneous nuclear ribonucleoproteins C1/C2 OS=Cricetulus griseus GN=I79_015427 PE=4 SV=1 - [G3HWP9_CRIGR]	783.71	0.1564	2	4	4	20	307	33.7	5.08
G3H5W5	LIM and SH3 domain protein 1 OS=Cricetulus griseus GN=I79_005710 PE=4 SV=1 - [G3H5W5_CRIGR]	572.02	0.2335	2	5	5	20	227	25.8	5.95
G3I366	Prolyl endopeptidase OS=Cricetulus griseus GN=I79_017867 PE=4 SV=1 - [G3I366_CRIGR]	250.77	0.1009	1	2	4	20	555	62.4	6.18
G3I004	40S ribosomal protein S11 OS=Cricetulus griseus GN=I79_016673 PE=3 SV=1 - [G3I004_CRIGR]	71.97	0.3418	3	5	5	19	158	18.4	10.3
Q32PD5	40S ribosomal protein S19 OS=Bos taurus GN=RPS19 PE=2 SV=3 - [RS19_BOVIN]	290.5	0.3517	2	7	7	19	145	16.1	10.32
G3I6J4	ADP-ribosylation factor 3 OS=Cricetulus griseus GN=I79_019118 PE=3 SV=1 - [G3I6J4_CRIGR]	436.72	0.3646	8	5	5	19	181	20.6	7.43
G3GX96	Actin-related protein 2/3 complex subunit 4 OS=Cricetulus griseus GN=I79_002331 PE=4 SV=1 - [G3GX96_CRIGR]	231.95	0.2321	1	4	4	19	168	19.7	8.43
G3I388	28 kDa heat-and acid-stable phosphoprotein OS=Cricetulus griseus GN=I79_017889 PE=4 SV=1 - [G3I388_CRIGR]	311.41	0.2265	1	4	4	19	181	20.6	7.39
G3HKG8	40S ribosomal protein S3a OS=Cricetulus griseus GN=Rps3a PE=3 SV=1 - [G3HKG8_CRIGR]	190.71	0.2386	4	7	7	19	264	29.9	9.73
Q148H7	Keratin, type II cytoskeletal 79 OS=Bos taurus GN=KRT79 PE=2 SV=1 - [K2C79_BOVIN]	312.76	0.0393	4	1	3	19	535	57.7	7.46
F1MMS9	Integrin alpha-3 OS=Bos taurus GN=ITGA3 PE=3 SV=1 - [ITA3_BOVIN]	326.76	0.0514	1	1	5	19	1050	116.3	6.6
Q3ZBD7	Glucose-6-phosphate isomerase OS=Bos taurus GN=GPI PE=2 SV=4 - [G6PI_BOVIN]	596.57	0.1113	1	3	4	19	557	62.8	7.71
P37980	Inorganic pyrophosphatase OS=Bos taurus GN=PPA1 PE=1 SV=2 - [IPYR_BOVIN]	346.32	0.2595	1	2	6	19	289	32.8	5.47
G3HUL2	Aldehyde oxidase OS=Cricetulus griseus GN=I79_014624 PE=4 SV=1 - [G3HUL2_CRIGR]	228.15	0.0068	1	2	3	19	3236	358.7	6.6
G3H945	Eukaryotic translation initiation factor 3 subunit I OS=Cricetulus griseus GN=Eif3i PE=3 SV=1 - [G3H945_CRIGR]	279.17	0.24	1	1	7	19	325	36.3	5.64
G3I5Z5	Prostaglandin reductase 1 OS=Cricetulus griseus GN=I79_018906 PE=4 SV=1 - [G3I5Z5_CRIGR]	530.03	0.1646	1	5	5	19	395	42.6	6.27
G3IJB6	Protein RCC2 OS=Cricetulus griseus GN=I79_023949 PE=4 SV=1 - [G3IJB6_CRIGR]	106.42	0.1918	1	5	5	19	292	31.9	7.05
G3H8F4	Dystroglycan OS=Cricetulus griseus GN=I79_006654 PE=4 SV=1 - [G3H8F4_CRIGR]	291.18	0.1041	2	8	8	19	893	96.8	8.54
G3HCW9	Peroxiredoxin-2 OS=Cricetulus griseus GN=I79_008337 PE=4 SV=1 - [G3HCW9_CRIGR]	416.56	0.4091	2	6	6	19	198	21.8	5.59
G3H303	Proteasome subunit beta type OS=Cricetulus griseus GN=I79_004608 PE=3 SV=1 - [G3H303_CRIGR]	384.01	0.3371	2	6	6	19	264	29.2	5.47
G3H0E4	Chondroitin sulfate proteoglycan 4 OS=Cricetulus griseus GN=I79_003599 PE=4 SV=1 - [G3H0E4_CRIGR]	355.42	0.0573	1	9	9	19	2323	251.9	5.68
G3HET8	Ubiquitin-conjugating enzyme E2 variant 1 OS=Cricetulus griseus GN=I79_009086 PE=4 SV=1 - [G3HET8_CRIGR]	319.35	0.4476	3	1	4	19	105	11.8	9.77
G3IJ98	Heterogeneous nuclear ribonucleoprotein A3 OS=Cricetulus griseus GN=I79_023931 PE=4 SV=1 - [G3IJ98_CRIGR]	465.94	0.2114	1	2	4	19	175	20	6.01
G3HSM3	Thimet oligopeptidase OS=Cricetulus griseus GN=I79_013857 PE=3 SV=1 - [G3HSM3_CRIGR]	339.93	0.0917	2	6	6	19	687	78.1	5.99
G3I766	Liver carboxylesterase OS=Cricetulus griseus GN=I79_019351 PE=4 SV=1 - [G3I766_CRIGR]	129.19	0.0642	2	1	3	19	561	62.4	5.97
G3GTE4	Growth factor receptor-bound protein 2 OS=Cricetulus griseus GN=I79_000924 PE=4 SV=1 - [G3GTE4_CRIGR]	52.37	0.1521	1	3	3	18	217	25.2	6.32
Q3SZC0	Enhancer of rudimentary homolog OS=Bos taurus GN=ERH PE=3 SV=1 - [ERH_BOVIN]	720.94	0.3269	2	3	3	18	104	12.3	5.92
Q2NL22	Eukaryotic initiation factor 4A-III OS=Bos taurus GN=EIF4A3 PE=2 SV=3 - [IF4A3_BOVIN]	326.29	0.1946	2	6	7	18	411	46.8	6.73
G3HC31	Protein S100-A6 OS=Cricetulus griseus GN=I79_008074 PE=4 SV=1 - [G3HC31_CRIGR]	359.61	0.573	1	4	4	18	89	10	5.48
Q9XSK7	Hepatoma-derived growth factor OS=Bos taurus GN=HDGF PE=2 SV=1 - [HDGF_BOVIN]	276.28	0.2636	2	5	5	18	239	26.6	4.73
Q2KIZ8	DNA replication licensing factor MCM6 OS=Bos taurus GN=MCM6 PE=2 SV=1 - [MCM6_BOVIN]	257.29	0.1108	1	1	7	18	821	92.9	5.36
P63009	AP-2 complex subunit beta OS=Bos taurus GN=AP2B1 PE=1 SV=2 - [AP2B1_BOVIN]	305.54	0.08	4	7	7	18	937	104.5	5.38
G3H2P3	Beta-galactosidase (Fragment) OS=Cricetulus griseus GN=I79_004461 PE=3 SV=1 - [G3H2P3_CRIGR]	675.28	0.0908	1	5	5	18	650	73.6	6.95
G3GZQ9	Lactase-phlorizin hydrolase OS=Cricetulus griseus GN=I79_003354 PE=3 SV=1 - [G3GZQ9_CRIGR]	305.27	0.0341	1	1	7	18	2669	301.1	6.11
G3H9V0	Proteasome subunit beta type OS=Cricetulus griseus GN=I79_007181 PE=3 SV=1 - [G3H9V0_CRIGR]	342.98	0.2388	2	5	5	18	201	22.8	7.88
G3I1Y9	Sulfated glycoprotein 1 OS=Cricetulus griseus GN=I79_017410 PE=4 SV=1 - [G3I1Y9_CRIGR]	183.97	0.1165	1	3	3	18	249	27.4	5.49
G3H3W4	Insulin-degrading enzyme OS=Cricetulus griseus GN=I79_004954 PE=3 SV=1 - [G3H3W4_CRIGR]	213.22	0.0818	2	7	7	18	978	113	6.27
G3GZZ0	Aspartate aminotransferase OS=Cricetulus griseus GN=I79_003438 PE=3 SV=1 - [G3GZZ0_CRIGR]	352.07	0.1138	12	2	5	18	413	46.2	7.21
G3HXA2	Basic leucine zipper and W2 domain-containing protein 2 OS=Cricetulus griseus GN=I79_015621 PE=4 SV=1 - [G3HXA2_CRIGR]	315.88	0.085	1	2	3	18	412	47.1	5.71
G3IAP3	Connective tissue growth factor OS=Cricetulus griseus GN=I79_020669 PE=4 SV=1 - [G3IAP3_CRIGR]	231.8	0.158	2	6	6	18	348	38.1	7.94
G3GYP7	Alcohol dehydrogenase [NADP+] OS=Cricetulus griseus GN=I79_002952 PE=4 SV=1 - [G3GYP7_CRIGR]	347.95	0.2623	2	6	7	18	324	36.5	7.12
Q08DM8	Translin OS=Bos taurus GN=TSN PE=2 SV=1 - [TSN_BOVIN]	239.13	0.2105	2	4	4	18	228	26.2	6.44
A3KN27	Keratin, type II cytoskeletal 74 OS=Bos taurus GN=KRT74 PE=2 SV=1 - [K2C74_BOVIN]	181.42	0.0273	4	1	3	17	550	59.9	7.93
A5PK61	Histone H3.3C OS=Bos taurus GN=H3F3C PE=2 SV=1 - [H3C_BOVIN]	281.95	0.3529	10	1	3	17	136	15.4	11.49
G3HE84	Microtubule-associated protein RP/EB family member 1 OS=Cricetulus griseus GN=I79_008861 PE=4 SV=1 - [G3HE84_CRIGR]	343.55	0.3843	4	9	9	17	268	30	5.22
G3HMJ8	60S ribosomal protein L7 OS=Cricetulus griseus GN=I79_011961 PE=4 SV=1 - [G3HMJ8_CRIGR]	241.2	0.1365	4	1	4	17	249	29.2	10.48
G3HP71	Heterogeneous nuclear ribonucleoprotein H (Fragment) OS=Cricetulus griseus GN=I79_012577 PE=4 SV=1 - [G3HP71_CRIGR]	316.78	0.1904	3	3	5	17	415	45.2	7.59
G3IKV6	UDP-GlcNAc:betaGal beta-1,3-N-acetylglucosaminyltransferase 7 OS=Cricetulus griseus GN=I79_024510 PE=4 SV=1 - [G3IKV6_CRIGR]	222.61	0.0784	1	2	2	17	408	46.6	8.6
G3I390	Actin-related protein 2/3 complex subunit 1B OS=Cricetulus griseus GN=I79_017891 PE=4 SV=1 - [G3I390_CRIGR]	217.71	0.2419	5	6	6	17	372	41	8.35
G3HPV5	Histone H1.5 OS=Cricetulus griseus GN=I79_012826 PE=3 SV=1 - [G3HPV5_CRIGR]	232.35	0.1532	2	3	5	17	222	22.4	10.92
G3IB32	Twinfilin-1 OS=Cricetulus griseus GN=I79_020820 PE=4 SV=1 - [G3IB32_CRIGR]	305.72	0.1041	1	3	4	17	413	46.2	8
G3GUL4	CD9 antigen OS=Cricetulus griseus GN=I79_001377 PE=4 SV=1 - [G3GUL4_CRIGR]	244.86	0.1384	1	4	4	17	159	17.7	6.73
G3HT77	Cytoplasmic FMR1-interacting protein 1 OS=Cricetulus griseus GN=I79_014098 PE=4 SV=1 - [G3HT77_CRIGR]	299.43	0.0726	2	8	8	17	1253	145.2	6.9
G3I073	Elongation factor 1-gamma OS=Cricetulus griseus GN=I79_016750 PE=4 SV=1 - [G3I073_CRIGR]	261.21	0.1453	1	1	3	17	234	27.1	6.05
G3HQL6	Thioredoxin reductase 1, cytoplasmic OS=Cricetulus griseus GN=I79_013121 PE=3 SV=1 - [G3HQL6_CRIGR]	411.57	0.1097	1	1	4	17	565	61.8	7.91
G3ICK1	Kunitz-type protease inhibitor 1 OS=Cricetulus griseus GN=I79_021399 PE=4 SV=1 - [G3ICK1_CRIGR]	283.26	0.1423	1	6	6	17	499	55.8	5.66
G3H9Z4	Serine-threonine kinase receptor-associated protein OS=Cricetulus griseus GN=I79_007227 PE=4 SV=1 - [G3H9Z4_CRIGR]	347.89	0.411	2	9	9	17	309	34.1	4.94
G3I1D2	Actin-like protein 6A OS=Cricetulus griseus GN=I79_017185 PE=3 SV=1 - [G3I1D2_CRIGR]	427.6	0.1282	1	4	4	17	429	47.4	5.6
G3IHC7	Protein arginine N-methyltransferase 1 OS=Cricetulus griseus GN=I79_023216 PE=4 SV=1 - [G3IHC7_CRIGR]	284.66	0.238	1	6	6	17	353	40.5	5.6
G3H5Q2	Epithelial cell adhesion molecule (Fragment) OS=Cricetulus griseus GN=I79_005638 PE=4 SV=1 - [G3H5Q2_CRIGR]	273.06	0.1833	1	3	3	17	240	26.5	6
Q5E9F9	26S protease regulatory subunit 7 OS=Bos taurus GN=PSMC2 PE=2 SV=3 - [PRS7_BOVIN]	434.82	0.2009	2	7	7	16	433	48.6	5.95
G3GTN1	Protein mago nashi-like OS=Cricetulus griseus GN=I79_001016 PE=4 SV=1 - [G3GTN1_CRIGR]	85.85	0.274	2	4	4	16	146	17.2	6.11
G3HSF3	Proteasome subunit alpha type OS=Cricetulus griseus GN=I79_013784 PE=3 SV=1 - [G3HSF3_CRIGR]	470.2	0.2949	1	4	4	16	234	25.9	7.43
Q148F1	Cofilin-2 OS=Bos taurus GN=CFL2 PE=2 SV=1 - [COF2_BOVIN]	455.65	0.241	1	1	4	16	166	18.7	7.88
Q3ZCL8	SH3 domain-binding glutamic acid-rich-like protein 3 OS=Bos taurus GN=SH3BGRL3 PE=3 SV=1 - [SH3L3_BOVIN]	170.97	0.5699	1	4	4	16	93	10.4	4.93
Q0IIM3	Heat shock protein 105 kDa OS=Bos taurus GN=HSPH1 PE=2 SV=1 - [HS105_BOVIN]	378.29	0.0547	2	1	4	16	859	96.7	5.35
Q3T102	Eukaryotic translation initiation factor 3 subunit E OS=Bos taurus GN=EIF3E PE=2 SV=1 - [EIF3E_BOVIN]	173.58	0.2494	2	2	8	16	445	52.2	6.04
P51122	Acidic leucine-rich nuclear phosphoprotein 32 family member A OS=Bos taurus GN=ANP32A PE=1 SV=2 - [AN32A_BOVIN]	301.89	0.1647	2	1	4	16	249	28.6	4.08
Q3T0L2	Endoplasmic reticulum resident protein 44 OS=Bos taurus GN=ERP44 PE=2 SV=1 - [ERP44_BOVIN]	448.09	0.1429	1	2	5	16	406	46.8	5.31
Q2KJ46	26S proteasome non-ATPase regulatory subunit 3 OS=Bos taurus GN=PSMD3 PE=2 SV=1 - [PSMD3_BOVIN]	320.59	0.118	2	5	6	16	534	60.9	8.6
Q2KIY5	Putative phospholipase B-like 2 OS=Bos taurus GN=PLBD2 PE=2 SV=1 - [PLBL2_BOVIN]	557.69	0.039	1	1	2	16	589	65.7	8.24
A3KN12	Adenylosuccinate lyase OS=Bos taurus GN=ADSL PE=2 SV=1 - [PUR8_BOVIN]	244.87	0.0857	2	4	4	16	490	55.4	6.89
G3H2D0	Serine/threonine-protein phosphatase OS=Cricetulus griseus GN=I79_004339 PE=3 SV=1 - [G3H2D0_CRIGR]	635.97	0.3443	6	6	6	16	244	28.1	5.96
G3GSW3	Coatomer subunit beta' OS=Cricetulus griseus GN=I79_000735 PE=4 SV=1 - [G3GSW3_CRIGR]	186.95	0.0556	2	4	4	16	791	89.4	5.5
G3IKH3	Collagen alpha-2(V) chain OS=Cricetulus griseus GN=I79_024376 PE=4 SV=1 - [G3IKH3_CRIGR]	254.43	0.1294	1	2	2	16	170	19	7.72
G3H0S7	Beta-2-microglobulin OS=Cricetulus griseus GN=I79_003745 PE=4 SV=1 - [G3H0S7_CRIGR]	277.16	0.3889	1	2	2	16	54	6.4	5.81
G3IBQ9	Phenylalanyl-tRNA synthetase beta chain OS=Cricetulus griseus GN=I79_021090 PE=4 SV=1 - [G3IBQ9_CRIGR]	275.61	0.0798	1	5	5	16	589	65.9	7.05
G3I936	Epididymal secretory protein E1 OS=Cricetulus griseus GN=I79_020069 PE=4 SV=1 - [G3I936_CRIGR]	205.28	0.2416	1	4	4	16	149	16.5	7.97
G3H832	Translationally-controlled tumor protein OS=Cricetulus griseus GN=I79_006528 PE=4 SV=1 - [G3H832_CRIGR]	124.53	0.6268	2	5	5	16	142	15.9	4.96
G3HKT3	Heterogeneous nuclear ribonucleoprotein F OS=Cricetulus griseus GN=I79_011313 PE=4 SV=1 - [G3HKT3_CRIGR]	174.98	0.3622	1	1	4	16	185	19.9	4.89
G3H609	Glutathione reductase, mitochondrial OS=Cricetulus griseus GN=I79_005762 PE=4 SV=1 - [G3H609_CRIGR]	331.28	0.1634	1	5	5	16	410	44.9	6.8
G3HFZ9	Crk-like protein OS=Cricetulus griseus GN=I79_009517 PE=4 SV=1 - [G3HFZ9_CRIGR]	369.95	0.1683	1	4	4	16	303	33.8	6.74
G3HDQ2	Malate dehydrogenase OS=Cricetulus griseus GN=I79_008638 PE=3 SV=1 - [G3HDQ2_CRIGR]	536.61	0.1856	1	2	4	16	334	36.4	6.58
G3HXU0	Tubulin--tyrosine ligase-like protein 12 OS=Cricetulus griseus GN=I79_015854 PE=4 SV=1 - [G3HXU0_CRIGR]	142.76	0.1878	1	9	9	16	655	75.6	5.92
G3HV18	60S ribosomal protein L12 OS=Cricetulus griseus GN=I79_014791 PE=3 SV=1 - [G3HV18_CRIGR]	406.53	0.3731	1	2	3	16	134	14.7	9.55
G3HMB9	Histone H2A OS=Cricetulus griseus GN=I79_011871 PE=3 SV=1 - [G3HMB9_CRIGR]	281.67	0.3516	6	1	3	15	128	13.5	10.58
P61287	Serine/threonine-protein phosphatase PP1-gamma catalytic subunit OS=Bos taurus GN=PPP1CC PE=2 SV=1 - [PP1G_BOVIN]	361.97	0.2415	2	1	6	15	323	37	6.54
Q28178	Thrombospondin-1 OS=Bos taurus GN=THBS1 PE=2 SV=2 - [TSP1_BOVIN]	332.19	0.0949	5	10	10	15	1170	129.5	4.97
Q3Y5Z3	Adiponectin OS=Bos taurus GN=ADIPOQ PE=1 SV=1 - [ADIPO_BOVIN]	262.59	0.1917	1	4	4	15	240	26.1	5.74
Q2T9P4	Nuclear autoantigenic sperm protein OS=Bos taurus GN=NASP PE=2 SV=2 - [NASP_BOVIN]	66.59	0.0785	1	5	5	15	777	83.6	4.34
P18341	Transforming growth factor beta-1 OS=Bos taurus GN=TGFB1 PE=1 SV=2 - [TGFB1_BOVIN]	254.01	0.0769	2	3	3	15	390	44.4	8.7
Q3B7M9	Glycogen phosphorylase, brain form OS=Bos taurus GN=PYGB PE=2 SV=3 - [PYGB_BOVIN]	193.89	0.0902	2	3	6	15	843	96.3	7.23
P46196	Mitogen-activated protein kinase 1 OS=Bos taurus GN=MAPK1 PE=2 SV=3 - [MK01_BOVIN]	86.06	0.1972	13	7	7	15	360	41.3	6.98
G3H2K2	Cytochrome c, somatic OS=Cricetulus griseus GN=I79_004417 PE=3 SV=1 - [G3H2K2_CRIGR]	283.7	0.4762	4	4	4	15	105	11.7	9.51
G3IMH4	Sphingomyelin phosphodiesterase OS=Cricetulus griseus GN=I79_025113 PE=4 SV=1 - [G3IMH4_CRIGR]	283.74	0.0725	2	4	4	15	593	66.2	7.05
A7YW45	Protein arginine N-methyltransferase 5 OS=Bos taurus GN=PRMT5 PE=2 SV=1 - [ANM5_BOVIN]	212.41	0.0675	2	4	4	15	637	72.6	6.29
G3HBJ9	Methionine aminopeptidase 2 OS=Cricetulus griseus GN=Metap2 PE=3 SV=1 - [G3HBJ9_CRIGR]	188.28	0.1381	2	5	5	15	478	52.9	5.82
G3HDE5	Proteasome activator complex subunit 1 OS=Cricetulus griseus GN=I79_008549 PE=4 SV=1 - [G3HDE5_CRIGR]	174.15	0.2326	3	4	4	15	215	24.5	5.44
G3HJW0	Glyceraldehyde-3-phosphate dehydrogenase OS=Cricetulus griseus GN=I79_010962 PE=4 SV=1 - [G3HJW0_CRIGR]	400.97	0.1478	1	1	2	15	115	12.9	5.06
G3H5W0	Proteasome subunit beta type OS=Cricetulus griseus GN=I79_005704 PE=3 SV=1 - [G3H5W0_CRIGR]	544.47	0.2835	4	4	4	15	194	21.9	6.55
G3GRB1	Calpain-2 catalytic subunit OS=Cricetulus griseus GN=I79_000054 PE=4 SV=1 - [G3GRB1_CRIGR]	108.21	0.0988	2	8	8	15	668	75.9	5.33
G3IIG1	Liver carboxylesterase OS=Cricetulus griseus GN=I79_023630 PE=4 SV=1 - [G3IIG1_CRIGR]	66	0.0499	2	1	3	15	561	62.1	5.85
G3HRJ1	FACT complex subunit SSRP1 OS=Cricetulus griseus GN=I79_013463 PE=4 SV=1 - [G3HRJ1_CRIGR]	186.39	0.0395	1	3	3	15	709	81	6.87
G3I9D3	Proteasome subunit beta type OS=Cricetulus griseus GN=I79_020170 PE=3 SV=1 - [G3I9D3_CRIGR]	208.58	0.0433	2	2	2	15	277	29.9	7.97
G3HBV0	Mesothelin OS=Cricetulus griseus GN=I79_007900 PE=4 SV=1 - [G3HBV0_CRIGR]	164.86	0.0687	1	2	2	15	335	38	5.55
G3HT18	Nucleosome assembly protein 1-like 1 OS=Cricetulus griseus GN=I79_014020 PE=3 SV=1 - [G3HT18_CRIGR]	170.08	0.1472	2	4	6	15	231	27.1	4.72
G3HQ02	Thymosin beta-10 OS=Cricetulus griseus GN=I79_012889 PE=4 SV=1 - [G3HQ02_CRIGR]	401.16	0.1818	1	2	2	15	88	10.1	9.33
Q3T035	Actin-related protein 2/3 complex subunit 3 OS=Bos taurus GN=ARPC3 PE=1 SV=3 - [ARPC3_BOVIN]	257.74	0.264	3	5	5	14	178	20.5	8.59
Q56K14	60S acidic ribosomal protein P1 OS=Bos taurus GN=RPLP1 PE=3 SV=1 - [RLA1_BOVIN]	306.78	0.9474	4	3	4	14	114	11.5	4.32
Q3ZBF7	Prostaglandin E synthase 3 OS=Bos taurus GN=PTGES3 PE=1 SV=1 - [TEBP_BOVIN]	117.21	0.2438	2	3	3	14	160	18.7	4.54
P61603	10 kDa heat shock protein, mitochondrial OS=Bos taurus GN=HSPE1 PE=3 SV=2 - [CH10_BOVIN]	159.2	0.2941	2	3	3	14	102	10.9	8.92
P79136-2	Isoform Beta-2 of F-actin-capping protein subunit beta OS=Bos taurus GN=CAPZB - [CAPZB_BOVIN]	146.52	0.3346	3	6	6	14	272	30.6	6
Q2KIT0	Protein HP-20 homolog OS=Bos taurus PE=2 SV=1 - [HP20_BOVIN]	306.23	0.2618	1	3	3	14	191	20.6	8.59
A6QPQ2	Serpin A3-8 OS=Bos taurus GN=SERPINA3-8 PE=2 SV=1 - [SPA38_BOVIN]	388.37	0.1148	1	2	4	14	418	46.9	6.13
Q58CQ9	Pantetheinase OS=Bos taurus GN=VNN1 PE=2 SV=1 - [VNN1_BOVIN]	154.41	0.1137	1	5	5	14	510	56.9	5.57
P79134	Annexin A6 OS=Bos taurus GN=ANXA6 PE=1 SV=2 - [ANXA6_BOVIN]	178.86	0.0565	1	1	4	14	673	75.9	5.9
A7YW98	Arginine--tRNA ligase, cytoplasmic OS=Bos taurus GN=RARS PE=2 SV=1 - [SYRC_BOVIN]	505.19	0.0652	1	1	4	14	660	75.5	6.87
Q2KIW9	UMP-CMP kinase OS=Bos taurus GN=CMPK1 PE=2 SV=2 - [KCY_BOVIN]	111.74	0.1939	1	3	3	14	196	22.3	5.83
Q29RL9	Transcription elongation factor A protein 1 OS=Bos taurus GN=TCEA1 PE=2 SV=1 - [TCEA1_BOVIN]	297.7	0.1495	3	4	4	14	301	33.9	8.38
G3HC47	Glucosylceramidase OS=Cricetulus griseus GN=I79_007997 PE=4 SV=1 - [G3HC47_CRIGR]	298.14	0.1029	2	5	5	14	515	57.4	8.13
G3HSX8	Biglycan OS=Cricetulus griseus GN=I79_013977 PE=4 SV=1 - [G3HSX8_CRIGR]	169.58	0.1491	2	6	6	14	369	41.6	7.31
G3HZE9	Valyl-tRNA synthetase OS=Cricetulus griseus GN=I79_016450 PE=3 SV=1 - [G3HZE9_CRIGR]	338.07	0.047	1	5	5	14	1488	165.4	7.99
G3IFX0	Programmed cell death protein 6 OS=Cricetulus griseus GN=I79_022645 PE=4 SV=1 - [G3IFX0_CRIGR]	141.93	0.2054	2	4	4	14	224	25.4	5.91
G3IE22	Aldo-keto reductase family 1 member B10 OS=Cricetulus griseus GN=I79_021964 PE=4 SV=1 - [G3IE22_CRIGR]	299.57	0.1264	1	2	4	14	277	31.5	9.1
G3IDD9	40S ribosomal protein S3 OS=Cricetulus griseus GN=I79_021716 PE=3 SV=1 - [G3IDD9_CRIGR]	134.48	0.6325	1	1	5	14	117	12.6	9.28
G3I581	Prefoldin subunit 1 OS=Cricetulus griseus GN=I79_018625 PE=4 SV=1 - [G3I581_CRIGR]	72.83	0.0986	2	1	1	14	71	8.5	6.09
G3H3P8	Beta-hexosaminidase OS=Cricetulus griseus GN=I79_004877 PE=3 SV=1 - [G3H3P8_CRIGR]	118.04	0.1269	2	5	6	14	528	60.6	6.48
A6QQ21	COP9 signalosome complex subunit 6 OS=Bos taurus GN=COPS6 PE=2 SV=1 - [CSN6_BOVIN]	55.94	0.1389	2	4	4	14	324	35.9	5.73
G3HAU1	Eukaryotic translation initiation factor 3 subunit E OS=Cricetulus griseus GN=I79_007550 PE=4 SV=1 - [G3HAU1_CRIGR]	144.45	0.3536	2	1	7	14	263	30.7	6.9
G3HRK1	Receptor tyrosine-protein kinase erbB-3 OS=Cricetulus griseus GN=I79_013507 PE=4 SV=1 - [G3HRK1_CRIGR]	102.4	0.0152	3	2	3	14	1902	209.5	6.93
G3H0S4	Sorbitol dehydrogenase OS=Cricetulus griseus GN=I79_003742 PE=3 SV=1 - [G3H0S4_CRIGR]	86.31	0.0672	1	2	2	14	357	38.3	7.66
G3I683	Plasminogen activator inhibitor 1 RNA-binding protein OS=Cricetulus griseus GN=I79_018995 PE=4 SV=1 - [G3I683_CRIGR]	59.45	0.0377	1	1	1	14	212	23.8	5.15
G3HTP6	Alpha-enolase OS=Cricetulus griseus GN=I79_014274 PE=4 SV=1 - [G3HTP6_CRIGR]	282.57	0.1626	1	1	2	14	123	13.9	4.94
G3H4N3	RuvB-like 2 OS=Cricetulus griseus GN=I79_005238 PE=4 SV=1 - [G3H4N3_CRIGR]	244.87	0.2176	1	1	3	14	193	20.9	9.04
G3I8T3	Wiskott-Aldrich syndrome protein family member 2 OS=Cricetulus griseus GN=I79_019962 PE=4 SV=1 - [G3I8T3_CRIGR]	231.43	0.1	3	3	3	14	360	39.5	8.56
G3H9J8	Exportin-T OS=Cricetulus griseus GN=I79_007072 PE=4 SV=1 - [G3H9J8_CRIGR]	292.98	0.0447	1	4	4	14	962	109.8	5.29
G3HRG8	Endoplasmic reticulum resident protein ERp44 (Fragment) OS=Cricetulus griseus GN=I79_013434 PE=4 SV=1 - [G3HRG8_CRIGR]	464.23	0.2597	1	2	4	14	258	29.7	5.33
G3HJM9	Neuromodulin OS=Cricetulus griseus GN=I79_010877 PE=4 SV=1 - [G3HJM9_CRIGR]	220.23	0.195	1	2	2	14	200	20.7	4.7
G3HKX2	Nuclear transport factor 2 OS=Cricetulus griseus GN=I79_011354 PE=4 SV=1 - [G3HKX2_CRIGR]	204.41	0.5669	3	5	5	13	127	14.5	5.38
G3HIM4	Cell division control protein 42-like OS=Cricetulus griseus GN=I79_010498 PE=3 SV=1 - [G3HIM4_CRIGR]	381	0.2094	2	3	3	13	191	21.2	6.55
P61285	Dynein light chain 1, cytoplasmic OS=Bos taurus GN=DYNLL1 PE=1 SV=1 - [DYL1_BOVIN]	411.84	0.382	2	2	2	13	89	10.4	7.4
P07589	Fibronectin OS=Bos taurus GN=FN1 PE=1 SV=4 - [FINC_BOVIN]	294.51	0.0359	2	7	7	13	2478	272	5.5
Q29423	CD44 antigen OS=Bos taurus GN=CD44 PE=2 SV=1 - [CD44_BOVIN]	217.79	0.0574	1	1	2	13	366	40	6.89
A7MB70	Semaphorin-3C OS=Bos taurus GN=SEMA3C PE=2 SV=1 - [SEM3C_BOVIN]	214.78	0.0399	1	1	3	13	751	85.2	8.62
Q3SYU7	Transportin-1 OS=Bos taurus GN=TNPO1 PE=1 SV=2 - [TNPO1_BOVIN]	366.2	0.088	3	6	6	13	898	102.3	4.98
G3HG23	Laminin subunit gamma-2 OS=Cricetulus griseus GN=I79_009542 PE=4 SV=1 - [G3HG23_CRIGR]	357.05	0.2398	1	4	4	13	221	24.4	4.75
G3H6M5	Fumarate hydratase, mitochondrial OS=Cricetulus griseus GN=I79_005991 PE=3 SV=1 - [G3H6M5_CRIGR]	478.74	0.1282	1	4	4	13	507	54.4	9.09
Q27966-3	Isoform 3 of Unconventional myosin-Ic OS=Bos taurus GN=MYO1C - [MYO1C_BOVIN]	111.42	0.0642	4	7	7	13	1044	119.8	9.31
G3I1J6	[Protein ADP-ribosylarginine] hydrolase OS=Cricetulus griseus GN=I79_017258 PE=4 SV=1 - [G3I1J6_CRIGR]	248.38	0.1514	1	3	5	13	350	38.8	6.28
G3I3J1	Asparagine synthetase OS=Cricetulus griseus GN=I79_017999 PE=4 SV=1 - [G3I3J1_CRIGR]	399.52	0.0606	2	3	3	13	561	64.3	6.58
G3I968	Histone H2A OS=Cricetulus griseus GN=I79_020102 PE=3 SV=1 - [G3I968_CRIGR]	227.71	0.3217	3	1	4	13	143	15.1	10.74
G3ID08	Putative pre-mRNA-splicing factor ATP-dependent RNA helicase DHX15 OS=Cricetulus griseus GN=I79_021569 PE=4 SV=1 - [G3ID08_CRIGR]	339.63	0.0852	1	6	6	13	728	82.8	7.12
G3HQ69	Src substrate cortactin OS=Cricetulus griseus GN=I79_012963 PE=4 SV=1 - [G3HQ69_CRIGR]	135.93	0.1636	1	6	6	13	550	61.4	5.4
G3H122	Ras-like GTP-binding protein YPT1 OS=Cricetulus griseus GN=I79_003844 PE=4 SV=1 - [G3H122_CRIGR]	166.6	0.2917	34	2	3	13	96	10.9	5.14
G3HLW5	Ras-related protein Rab-5C OS=Cricetulus griseus GN=I79_011709 PE=3 SV=1 - [G3HLW5_CRIGR]	382.36	0.2685	5	5	5	13	216	23.5	8.41
G3I3E3	Ubiquitin-conjugating enzyme E2 variant 2 OS=Cricetulus griseus GN=I79_017948 PE=4 SV=1 - [G3I3E3_CRIGR]	125.71	0.3846	4	1	3	13	65	7.2	9.38
G3II02	Serine/threonine-protein phosphatase 2A regulatory subunit B' (Fragment) OS=Cricetulus griseus GN=I79_023463 PE=4 SV=1 - [G3II02_CRIGR]	236.94	0.1278	2	2	2	13	180	20.4	6.52
G3H8F2	Acylamino-acid-releasing enzyme OS=Cricetulus griseus GN=I79_006652 PE=4 SV=1 - [G3H8F2_CRIGR]	181.89	0.071	2	5	5	13	732	81.5	5.34
G3GXT2	CAD protein OS=Cricetulus griseus GN=I79_002575 PE=3 SV=1 - [G3GXT2_CRIGR]	402.76	0.0391	1	6	6	13	2225	242.9	6.49
G3GRT8	Diphosphomevalonate decarboxylase OS=Cricetulus griseus GN=I79_000232 PE=4 SV=1 - [G3GRT8_CRIGR]	175.16	0.1721	1	5	5	13	401	43.8	6.39
G3IF40	Carbonyl reductase [NADPH] 1 OS=Cricetulus griseus GN=I79_022353 PE=3 SV=1 - [G3IF40_CRIGR]	258.45	0.1867	9	4	4	13	241	26.7	7.75
G3IIE3	Serpin B8 OS=Cricetulus griseus GN=I79_023611 PE=3 SV=1 - [G3IIE3_CRIGR]	257.48	0.1497	1	4	4	13	374	42.5	6.37
G3HHE4	Leucyl-tRNA synthetase, cytoplasmic OS=Cricetulus griseus GN=I79_010044 PE=4 SV=1 - [G3HHE4_CRIGR]	129.21	0.0776	1	3	3	13	438	49.8	7.15
G3HB04	Protein disulfide-isomerase A6 OS=Cricetulus griseus GN=I79_007616 PE=4 SV=1 - [G3HB04_CRIGR]	437.76	0.2124	1	4	4	13	259	28.4	4.91
G3IIB1	Sialate O-acetylesterase OS=Cricetulus griseus GN=I79_023579 PE=4 SV=1 - [G3IIB1_CRIGR]	324.7	0.0727	1	3	3	13	550	61.4	8.22
G3HNA5	Ubiquitin carboxyl-terminal hydrolase isozyme L3 (Fragment) OS=Cricetulus griseus GN=I79_012242 PE=4 SV=1 - [G3HNA5_CRIGR]	223.51	0.2704	1	3	4	13	196	22.4	5.05
G3I8H9	Cysteine and histidine-rich domain-containing protein 1 OS=Cricetulus griseus GN=I79_019852 PE=4 SV=1 - [G3I8H9_CRIGR]	342.1	0.1898	2	4	4	13	332	37.4	7.75
G3HL16	Splicing factor 3B subunit 1 OS=Cricetulus griseus GN=I79_011401 PE=4 SV=1 - [G3HL16_CRIGR]	204.2	0.0683	1	6	6	12	1304	145.7	7.09
Q3T0Q6	Cellular nucleic acid-binding protein OS=Bos taurus GN=CNBP PE=2 SV=1 - [CNBP_BOVIN]	696.13	0.2412	2	3	3	12	170	18.7	7.71
G3H1F4	Ribosomal protein L15 OS=Cricetulus griseus GN=I79_003979 PE=3 SV=1 - [G3H1F4_CRIGR]	192.51	0.2059	1	4	4	12	204	24.1	11.62
G3I0Q1	40S ribosomal protein S26 OS=Cricetulus griseus GN=I79_016940 PE=4 SV=1 - [G3I0Q1_CRIGR]	78.64	0.2087	4	1	2	12	115	13	11
Q56JU9-2	Isoform 2 of 40S ribosomal protein S24 OS=Bos taurus GN=RPS24 - [RS24_BOVIN]	301.77	0.1769	3	2	2	12	130	15.1	10.89
A4FUA8	F-actin-capping protein subunit alpha-1 OS=Bos taurus GN=CAPZA1 PE=2 SV=1 - [CAZA1_BOVIN]	278.67	0.2203	2	3	4	12	286	32.9	5.82
A5D7A0	EF-hand domain-containing protein D2 OS=Bos taurus GN=EFHD2 PE=2 SV=1 - [EFHD2_BOVIN]	204.38	0.2479	4	5	5	12	242	26.9	5.15
Q2TBG8	Ubiquitin carboxyl-terminal hydrolase isozyme L3 OS=Bos taurus GN=UCHL3 PE=2 SV=1 - [UCHL3_BOVIN]	183.19	0.1522	1	2	3	12	230	26.2	4.92
A5PK39	Tripeptidyl-peptidase 2 OS=Bos taurus GN=TPP2 PE=2 SV=1 - [TPP2_BOVIN]	120.44	0.0224	1	3	3	12	1249	138.3	6.29
G3I2F2	Splicing factor 3B subunit 2 OS=Cricetulus griseus GN=I79_017595 PE=4 SV=1 - [G3I2F2_CRIGR]	289.26	0.0674	1	4	4	12	935	103.8	5.96
G3HN89	Palmitoyl-protein thioesterase 1 OS=Cricetulus griseus GN=I79_012225 PE=4 SV=1 - [G3HN89_CRIGR]	237.14	0.1242	1	3	3	12	306	34.5	7.85
G3H510	Talin-2 OS=Cricetulus griseus GN=I79_005377 PE=4 SV=1 - [G3H510_CRIGR]	308.25	0.0134	1	1	3	12	2542	271.5	5.58
G3HJS1	Spectrin beta chain, brain 1 OS=Cricetulus griseus GN=I79_010920 PE=4 SV=1 - [G3HJS1_CRIGR]	139.22	0.072	1	5	5	12	820	94.5	5.95
G3HIX6	Tryptophanyl-tRNA synthetase, cytoplasmic OS=Cricetulus griseus GN=I79_010607 PE=3 SV=1 - [G3HIX6_CRIGR]	440.35	0.0842	2	3	3	12	475	53.5	6.42
G3H8Q4	Acidic leucine-rich nuclear phosphoprotein 32 family member A OS=Cricetulus griseus GN=I79_006764 PE=4 SV=1 - [G3H8Q4_CRIGR]	405.74	0.2945	2	1	4	12	146	16.5	4.69
G3I4I9	Major vault protein OS=Cricetulus griseus GN=I79_018369 PE=4 SV=1 - [G3I4I9_CRIGR]	184.19	0.0511	2	4	4	12	861	95.9	5.73
G3I8F5	Keratin, type I cytoskeletal 13 OS=Cricetulus griseus GN=I79_019822 PE=3 SV=1 - [G3I8F5_CRIGR]	307.7	0.1176	9	2	5	12	442	48.1	4.94
Q32KR8	[Protein ADP-ribosylarginine] hydrolase OS=Bos taurus GN=ADPRH PE=2 SV=1 - [ADPRH_BOVIN]	246.18	0.0822	1	1	3	12	353	39.1	6.47
G3IDT6	Protein disulfide-isomerase A4 OS=Cricetulus griseus GN=I79_021872 PE=3 SV=1 - [G3IDT6_CRIGR]	250.75	0.0685	1	3	3	12	642	72.5	5.17
G3HCT1	Importin subunit alpha OS=Cricetulus griseus GN=I79_008297 PE=3 SV=1 - [G3HCT1_CRIGR]	138.97	0.0775	1	3	3	12	529	57.8	5.34
G3HQZ8	Cytoplasmic aconitate hydratase OS=Cricetulus griseus GN=I79_013257 PE=4 SV=1 - [G3HQZ8_CRIGR]	218.09	0.0507	2	3	3	12	808	88.9	6.84
Q3ZCK1	Eukaryotic translation initiation factor 3 subunit L OS=Bos taurus GN=EIF3L PE=2 SV=1 - [EIF3L_BOVIN]	475.77	0.1277	2	6	6	12	564	66.7	6.34
G3HEJ4	Neogenin OS=Cricetulus griseus GN=I79_008978 PE=4 SV=1 - [G3HEJ4_CRIGR]	225.89	0.0149	1	2	2	12	1405	154.4	6.64
G3GZD2	Phosphoglucomutase-1 OS=Cricetulus griseus GN=I79_003195 PE=3 SV=1 - [G3GZD2_CRIGR]	267.05	0.1206	1	3	5	12	572	62.8	5.86
G3I539	Hsc70-interacting protein OS=Cricetulus griseus GN=I79_018582 PE=4 SV=1 - [G3I539_CRIGR]	200.2	0.3629	1	4	4	12	124	13.9	6.77
G3INU6	UDP-glucose 6-dehydrogenase OS=Cricetulus griseus GN=I79_025636 PE=3 SV=1 - [G3INU6_CRIGR]	347.78	0.1631	1	3	4	12	282	30.7	8.07
G3I3W4	S-formylglutathione hydrolase OS=Cricetulus griseus GN=I79_018133 PE=4 SV=1 - [G3I3W4_CRIGR]	154.22	0.1915	2	3	3	12	282	31.3	6.9
G3H7M8	Heterogeneous nuclear ribonucleoprotein U OS=Cricetulus griseus GN=I79_006363 PE=4 SV=1 - [G3H7M8_CRIGR]	219.61	0.2148	1	7	7	12	512	57.6	9.32
G3I620	Aspartyl aminopeptidase OS=Cricetulus griseus GN=I79_018931 PE=3 SV=1 - [G3I620_CRIGR]	236.7	0.2144	2	6	6	12	471	51.9	7.12
G3GW88	Serine/threonine-protein phosphatase OS=Cricetulus griseus GN=I79_002008 PE=3 SV=1 - [G3GW88_CRIGR]	361.97	0.2274	2	1	5	12	299	34.1	6.16
G3GT56	Trifunctional purine biosynthetic protein adenosine-3 OS=Cricetulus griseus GN=I79_000830 PE=3 SV=1 - [G3GT56_CRIGR]	288.66	0.0535	1	2	4	12	1010	107.5	6.81
G3H5G6	Thioredoxin-like protein 1 OS=Cricetulus griseus GN=I79_005547 PE=4 SV=1 - [G3H5G6_CRIGR]	315.07	0.2751	1	4	4	12	189	20.8	4.86
Q58D31	Sorbitol dehydrogenase OS=Bos taurus GN=SORD PE=2 SV=3 - [DHSO_BOVIN]	111.84	0.0478	1	1	1	12	356	38.1	7.46
G3I5Q9	Ras-related protein Rab-11B OS=Cricetulus griseus GN=I79_018814 PE=3 SV=1 - [G3I5Q9_CRIGR]	306.01	0.1972	3	4	4	11	218	24.5	5.94
F7J0L2	Splicing factor, arginine/serine-rich 1 (Fragment) OS=Cricetulus griseus GN=Srsf1 PE=2 SV=1 - [F7J0L2_CRIGR]	125.74	0.1169	1	4	4	11	248	27.7	10.36
Q5E9E6	60S ribosomal protein L10a OS=Bos taurus GN=RPL10A PE=2 SV=3 - [RL10A_BOVIN]	174.24	0.1336	2	2	2	11	217	24.8	9.94
G3HQ18	Tetraspanin-14 OS=Cricetulus griseus GN=I79_012907 PE=4 SV=1 - [G3HQ18_CRIGR]	195.67	0.0778	1	2	2	11	270	30.7	6.51
P50448	Factor XIIa inhibitor OS=Bos taurus PE=1 SV=1 - [F12AI_BOVIN]	299.3	0.1346	1	5	5	11	468	51.7	6.67
A4IF97	Myosin regulatory light chain 12B OS=Bos taurus GN=MYL12B PE=2 SV=1 - [ML12B_BOVIN]	397.24	0.345	4	4	4	11	171	19.7	4.84
P31404	V-type proton ATPase catalytic subunit A OS=Bos taurus GN=ATP6V1A PE=2 SV=2 - [VATA_BOVIN]	271.12	0.1053	2	4	4	11	617	68.3	5.58
G3I2I9	60S ribosomal protein L3 OS=Cricetulus griseus GN=I79_017622 PE=3 SV=1 - [G3I2I9_CRIGR]	233.54	0.067	2	3	3	11	403	46.1	10.21
G3H283	Putative uncharacterized protein OS=Cricetulus griseus GN=I79_004254 PE=4 SV=1 - [G3H283_CRIGR]	206.75	0.072	1	6	6	11	972	111.8	6.64
G3HDL6	Elongation factor 1-beta OS=Cricetulus griseus GN=I79_008601 PE=3 SV=1 - [G3HDL6_CRIGR]	467.35	0.2311	2	4	4	11	225	24.7	4.67
G3HKU8	Cadherin-1 OS=Cricetulus griseus GN=I79_011330 PE=3 SV=1 - [G3HKU8_CRIGR]	167.07	0.0672	2	3	4	11	744	82.3	4.51
G3ICE3	COP9 signalosome complex subunit 5 OS=Cricetulus griseus GN=I79_021338 PE=4 SV=1 - [G3ICE3_CRIGR]	106.8	0.0703	1	3	3	11	327	37	6.54
G3I3Z5	Coronin OS=Cricetulus griseus GN=I79_018166 PE=3 SV=1 - [G3I3Z5_CRIGR]	193.89	0.1136	1	6	6	11	484	53.8	5.78
G3I6T1	Putative phospholipase B-like 2 OS=Cricetulus griseus GN=I79_019209 PE=4 SV=1 - [G3I6T1_CRIGR]	147.72	0.0923	1	3	4	11	585	65.5	6.28
G3HMI3	Semaphorin-3C OS=Cricetulus griseus GN=I79_011946 PE=4 SV=1 - [G3HMI3_CRIGR]	139.62	0.0629	1	1	3	11	493	55.6	7.34
G3HCC0	60S ribosomal protein L27 OS=Cricetulus griseus GN=I79_008127 PE=4 SV=1 - [G3HCC0_CRIGR]	143.01	0.1545	6	2	2	11	110	12.1	10.13
G3HTF8	Proto-oncogene C-crk OS=Cricetulus griseus GN=I79_014183 PE=4 SV=1 - [G3HTF8_CRIGR]	257.58	0.1284	1	3	3	11	327	36.1	5.73
G3HMG1	40S ribosomal protein S13 OS=Cricetulus griseus GN=I79_011923 PE=4 SV=1 - [G3HMG1_CRIGR]	188.36	0.1515	3	2	2	11	132	15.2	10.32
G3GXX7	Proto-oncogene tyrosine-protein kinase Src OS=Cricetulus griseus GN=I79_002622 PE=4 SV=1 - [G3GXX7_CRIGR]	244.5	0.0504	1	3	3	11	536	59.9	7.42
G3HA51	Procollagen-lysine,2-oxoglutarate 5-dioxygenase 3 OS=Cricetulus griseus GN=I79_007293 PE=4 SV=1 - [G3HA51_CRIGR]	189.86	0.1429	1	4	4	11	322	37.6	6.33
G3H942	Histone deacetylase OS=Cricetulus griseus GN=I79_006904 PE=3 SV=1 - [G3H942_CRIGR]	42.96	0.0726	5	4	4	11	482	55.1	5.48
G3H485	Coatomer subunit epsilon OS=Cricetulus griseus GN=I79_005085 PE=4 SV=1 - [G3H485_CRIGR]	62.5	0.1494	2	3	3	11	308	34.5	5.12
G3I015	NAD(P)H dehydrogenase [quinone] 1 OS=Cricetulus griseus GN=I79_016687 PE=4 SV=1 - [G3I015_CRIGR]	156.13	0.1095	1	3	3	11	274	31	8.69
G3HUU6	Protein S100-A11 OS=Cricetulus griseus GN=I79_014714 PE=4 SV=1 - [G3HUU6_CRIGR]	259.53	0.29	1	3	3	11	100	11.2	7.08
G3HTU7	Integrin beta-4 OS=Cricetulus griseus GN=I79_014327 PE=4 SV=1 - [G3HTU7_CRIGR]	254.25	0.0462	1	3	3	11	650	71.1	5.96
G3H604	Alpha-galactosidase A OS=Cricetulus griseus GN=I79_005753 PE=4 SV=1 - [G3H604_CRIGR]	119.49	0.1056	1	3	3	11	341	38.5	5.05
G3H2Z7	26S proteasome non-ATPase regulatory subunit 4 OS=Cricetulus griseus GN=I79_004602 PE=4 SV=1 - [G3H2Z7_CRIGR]	117.89	0.1184	2	3	3	11	380	41.1	4.81
G3HPF1	Small nuclear ribonucleoprotein Sm D2 OS=Cricetulus griseus GN=I79_012663 PE=4 SV=1 - [G3HPF1_CRIGR]	175.36	0.1852	2	2	2	11	108	12.3	9.67
G3HEZ0	Stress-70 protein, mitochondrial OS=Cricetulus griseus GN=I79_009139 PE=3 SV=1 - [G3HEZ0_CRIGR]	266.7	0.0463	2	3	3	11	605	65.8	6.1
G3HY75	Serine/threonine-protein phosphatase 2A 55 kDa regulatory subunit B OS=Cricetulus griseus GN=I79_015996 PE=3 SV=1 - [G3HY75_CRIGR]	201.85	0.116	5	4	4	11	457	52.9	6.49
G3HIS0	26S proteasome non-ATPase regulatory subunit 6 OS=Cricetulus griseus GN=I79_010547 PE=4 SV=1 - [G3HIS0_CRIGR]	205.08	0.1671	2	5	5	11	389	45.5	5.6
G3I5H3	Elongation factor 1-delta OS=Cricetulus griseus GN=I79_018721 PE=3 SV=1 - [G3I5H3_CRIGR]	390.37	0.1747	1	4	4	11	332	36.6	5.62
G3H6Y6	NSFL1 cofactor p47 OS=Cricetulus griseus GN=I79_006110 PE=4 SV=1 - [G3H6Y6_CRIGR]	525.73	0.1263	2	3	3	11	372	41	5.2
Q0VFX8	Cysteine-rich protein 2 OS=Bos taurus GN=CRIP2 PE=2 SV=1 - [CRIP2_BOVIN]	350.01	0.0769	2	1	1	11	208	22.6	8.72
G3HXZ3	CD81 antigen OS=Cricetulus griseus GN=I79_015909 PE=4 SV=1 - [G3HXZ3_CRIGR]	322.65	0.1525	1	2	2	11	236	25.8	5.52
G3IBH0	Metalloproteinase inhibitor 1 OS=Cricetulus griseus GN=I79_020990 PE=4 SV=1 - [G3IBH0_CRIGR]	168.46	0.2167	1	4	4	11	203	22.4	8.47
Q0P5K3	Ubiquitin-conjugating enzyme E2 N OS=Bos taurus GN=UBE2N PE=2 SV=1 - [UBE2N_BOVIN]	271.31	0.1842	2	3	3	10	152	17.1	6.57
Q3MHR5	Serine/arginine-rich splicing factor 2 OS=Bos taurus GN=SRSF2 PE=2 SV=3 - [SRSF2_BOVIN]	369.08	0.1855	1	3	3	10	221	25.5	11.85
Q3ZBH8	40S ribosomal protein S20 OS=Bos taurus GN=RPS20 PE=3 SV=1 - [RS20_BOVIN]	75.16	0.2857	2	3	3	10	119	13.4	9.94
G3IBF7	Ubiquitin-conjugating enzyme E2 K OS=Cricetulus griseus GN=I79_020977 PE=3 SV=1 - [G3IBF7_CRIGR]	281.11	0.36	1	5	5	10	200	22.4	5.44
Q3T0W9	60S ribosomal protein L19 OS=Bos taurus GN=RPL19 PE=2 SV=1 - [RL19_BOVIN]	214.27	0.1735	1	3	3	10	196	23.5	11.47
G3I2F5	Barrier-to-autointegration factor OS=Cricetulus griseus GN=I79_017597 PE=4 SV=1 - [G3I2F5_CRIGR]	230.58	0.4831	1	3	3	10	89	10.1	6.09
G3I5R2	40S ribosomal protein S28 OS=Cricetulus griseus GN=I79_018817 PE=3 SV=1 - [G3I5R2_CRIGR]	226.03	0.3043	1	2	2	10	69	7.8	10.7
G3HMS8	60S ribosomal protein L17 OS=Cricetulus griseus GN=I79_012050 PE=3 SV=1 - [G3HMS8_CRIGR]	158.88	0.1141	3	2	2	10	184	21.4	10.18
G3I757	ADP-ribosylation factor-like protein 3 OS=Cricetulus griseus GN=I79_019342 PE=3 SV=1 - [G3I757_CRIGR]	114.19	0.1154	2	2	2	10	182	20.5	7.24
O97680	Thioredoxin OS=Bos taurus GN=TXN PE=3 SV=3 - [THIO_BOVIN]	143.48	0.3429	2	3	3	10	105	11.8	5.03
P80209	Cathepsin D OS=Bos taurus GN=CTSD PE=1 SV=2 - [CATD_BOVIN]	203.46	0.0667	1	1	2	10	390	42.5	7.05
Q5E9A1	Nascent polypeptide-associated complex subunit alpha OS=Bos taurus GN=NACA PE=1 SV=1 - [NACA_BOVIN]	588.88	0.1302	2	2	2	10	215	23.4	4.56
Q2KIU3	Protein HP-25 homolog 2 OS=Bos taurus PE=2 SV=1 - [HP252_BOVIN]	206.1	0.2093	1	3	3	10	215	22.9	5.33
Q3SYX9	Actin-related protein 2/3 complex subunit 5 OS=Bos taurus GN=ARPC5 PE=1 SV=3 - [ARPC5_BOVIN]	328.88	0.1656	1	2	2	10	151	16.2	6.18
Q5E997	F-actin-capping protein subunit alpha-2 OS=Bos taurus GN=CAPZA2 PE=1 SV=3 - [CAZA2_BOVIN]	282.15	0.1469	1	2	3	10	286	33	5.85
A4FUD3	116 kDa U5 small nuclear ribonucleoprotein component OS=Bos taurus GN=EFTUD2 PE=2 SV=1 - [U5S1_BOVIN]	125.41	0.0648	2	4	5	10	972	109.3	5
P11064	Low molecular weight phosphotyrosine protein phosphatase OS=Bos taurus GN=ACP1 PE=1 SV=3 - [PPAC_BOVIN]	195.79	0.2025	3	3	3	10	158	18	7.11
Q2TA40	Nucleosome assembly protein 1-like 4 OS=Bos taurus GN=NAP1L4 PE=2 SV=1 - [NP1L4_BOVIN]	76.49	0.1036	1	1	4	10	386	44	4.65
A6H7B5	COP9 signalosome complex subunit 3 OS=Bos taurus GN=COPS3 PE=2 SV=1 - [CSN3_BOVIN]	190.21	0.1466	2	5	5	10	423	47.8	6.65
Q56JV6	Twinfilin-1 OS=Bos taurus GN=TWF1 PE=2 SV=1 - [TWF1_BOVIN]	391.58	0.0629	1	1	2	10	350	40.2	6.96
G3HW34	Prolow-density lipoprotein receptor-related protein 1 OS=Cricetulus griseus GN=I79_015182 PE=4 SV=1 - [G3HW34_CRIGR]	147.69	0.0198	1	3	3	10	2217	245.8	5.31
G3H289	Aldehyde dehydrogenase, mitochondrial OS=Cricetulus griseus GN=I79_004260 PE=3 SV=1 - [G3H289_CRIGR]	196.66	0.1303	2	4	4	10	422	45.9	5.8
G3HKL1	Acid sphingomyelinase-like phosphodiesterase 3a (Fragment) OS=Cricetulus griseus GN=I79_011240 PE=4 SV=1 - [G3HKL1_CRIGR]	130.29	0.0361	1	2	2	10	416	47.2	6.3
G3HF36	Ubiquitin-conjugating enzyme E2 R1 (Fragment) OS=Cricetulus griseus GN=I79_009189 PE=3 SV=1 - [G3HF36_CRIGR]	145.63	0.0307	1	1	1	10	228	25.8	4.53
G3H453	Small nuclear ribonucleoprotein-associated protein OS=Cricetulus griseus GN=I79_005053 PE=3 SV=1 - [G3H453_CRIGR]	160.01	0.1031	4	3	3	10	223	22.8	10.86
G3H3E3	Soluble calcium-activated nucleotidase 1 OS=Cricetulus griseus GN=I79_004758 PE=4 SV=1 - [G3H3E3_CRIGR]	160.39	0.1575	1	5	5	10	400	45.2	6.64
G3H1W4	Tubulointerstitial nephritis antigen-like OS=Cricetulus griseus GN=I79_004150 PE=3 SV=1 - [G3H1W4_CRIGR]	319.06	0.1398	1	4	4	10	465	52.5	7.08
G3IJU1	MAM domain-containing protein 2 OS=Cricetulus griseus GN=I79_024128 PE=4 SV=1 - [G3IJU1_CRIGR]	361.43	0.2743	1	4	4	10	226	25.2	4.65
G3HAZ0	SLIT-ROBO Rho GTPase-activating protein 2 OS=Cricetulus griseus GN=I79_007602 PE=4 SV=1 - [G3HAZ0_CRIGR]	225.11	0.0723	1	6	6	10	858	98.2	5.96
G3IDN7	Protein FAM3C OS=Cricetulus griseus GN=I79_021820 PE=4 SV=1 - [G3IDN7_CRIGR]	316.12	0.1718	2	3	3	10	227	24.7	8.29
G3IA32	COP9 signalosome complex subunit 4 OS=Cricetulus griseus GN=I79_020448 PE=4 SV=1 - [G3IA32_CRIGR]	202.3	0.1429	2	4	4	10	406	46.3	5.83
G3IF52	Nucleobindin-2 OS=Cricetulus griseus GN=I79_022367 PE=4 SV=1 - [G3IF52_CRIGR]	273.52	0.0786	1	3	3	10	420	50.3	5.15
G3I1R2	Purine nucleoside phosphorylase (Fragment) OS=Cricetulus griseus GN=I79_017328 PE=4 SV=1 - [G3I1R2_CRIGR]	399	0.1025	2	2	2	10	283	31.4	6.73
G3GSH5	ATP-dependent RNA helicase DDX3X OS=Cricetulus griseus GN=I79_000589 PE=3 SV=1 - [G3GSH5_CRIGR]	332.02	0.0317	1	1	2	10	662	73.2	7.18
G3I4E6	Inositol monophosphatase OS=Cricetulus griseus GN=I79_018324 PE=4 SV=1 - [G3I4E6_CRIGR]	240.21	0.1356	2	3	3	10	236	25.6	6.77
G3IIT5	Nucleosome assembly protein 1-like 4 OS=Cricetulus griseus GN=I79_023761 PE=3 SV=1 - [G3IIT5_CRIGR]	178.17	0.1072	1	1	4	10	345	39.4	4.68
G3H9U3	Splicing factor, proline-and glutamine-rich OS=Cricetulus griseus GN=I79_007174 PE=4 SV=1 - [G3H9U3_CRIGR]	161.53	0.188	1	3	4	10	351	40.2	6.74
G3HPZ2	S-adenosylmethionine synthase OS=Cricetulus griseus GN=I79_012879 PE=3 SV=1 - [G3HPZ2_CRIGR]	377.05	0.0452	1	1	1	10	332	36.9	8.12
G3HTZ1	Myelin protein P0 OS=Cricetulus griseus GN=I79_014394 PE=4 SV=1 - [G3HTZ1_CRIGR]	363.43	0.032	2	2	2	10	437	48.8	9.51
G3I3H9	Chitinase domain-containing protein 1 OS=Cricetulus griseus GN=I79_017987 PE=3 SV=1 - [G3I3H9_CRIGR]	265.1	0.1094	1	3	3	10	393	44.9	7.97
G3H7K6	Carboxymethylenebutenolidase-like OS=Cricetulus griseus GN=I79_006339 PE=4 SV=1 - [G3H7K6_CRIGR]	150.52	0.2286	1	4	4	10	245	27.9	6.93
G3GY88	Phospholipid scramblase 3 OS=Cricetulus griseus GN=I79_002761 PE=4 SV=1 - [G3GY88_CRIGR]	302.68	0.1966	1	4	4	10	295	31.7	6.65
Q3ZCH5	Zinc-alpha-2-glycoprotein OS=Bos taurus GN=AZGP1 PE=2 SV=1 - [ZA2G_BOVIN]	64.47	0.1706	1	4	4	10	299	33.8	5.24
G3IGP3	Heparan sulfate glucosamine 3-O-sulfotransferase 1 OS=Cricetulus griseus GN=I79_022963 PE=4 SV=1 - [G3IGP3_CRIGR]	67.01	0.1415	1	4	4	10	311	35.9	9.11
G3HQV2	Serine/threonine-protein kinase OSR1 OS=Cricetulus griseus GN=I79_013208 PE=4 SV=1 - [G3HQV2_CRIGR]	84.1	0.054	1	2	2	10	426	47.5	9.06
G3I6E3	Lin-7-like C OS=Cricetulus griseus GN=I79_019060 PE=4 SV=1 - [G3I6E3_CRIGR]	151.92	0.1878	4	3	3	9	197	21.8	8.43
G3HXW9	Alpha-centractin OS=Cricetulus griseus GN=I79_015885 PE=3 SV=1 - [G3HXW9_CRIGR]	173.69	0.1463	3	4	4	9	376	42.6	6.64
G3IKE2	40S ribosomal protein S15a OS=Cricetulus griseus GN=I79_024343 PE=3 SV=1 - [G3IKE2_CRIGR]	120.53	0.1769	5	3	3	9	130	14.8	10.13
G3H6X4	Splicing factor 3B subunit 5 OS=Cricetulus griseus GN=I79_006094 PE=4 SV=1 - [G3H6X4_CRIGR]	407.13	0.1744	1	1	1	9	86	10.1	6.35
Q29RQ1	Complement component C7 OS=Bos taurus GN=C7 PE=2 SV=1 - [CO7_BOVIN]	307.72	0.0463	1	3	3	9	843	93	7.11
Q3ZBY2	Transgelin-3 OS=Bos taurus GN=TAGLN3 PE=2 SV=1 - [TAGL3_BOVIN]	273.51	0.1256	2	1	2	9	199	22.5	7.33
A6QNM8	Probable threonine--tRNA ligase 2, cytoplasmic OS=Bos taurus GN=TARSL2 PE=2 SV=1 - [SYTC2_BOVIN]	148.51	0.0221	2	1	2	9	724	83	6.15
Q9XSA7	Chloride intracellular channel protein 4 OS=Bos taurus GN=CLIC4 PE=2 SV=3 - [CLIC4_BOVIN]	276.27	0.0949	3	2	2	9	253	28.7	5.78
P05689	Cathepsin Z OS=Bos taurus GN=CTSZ PE=2 SV=2 - [CATZ_BOVIN]	194.63	0.1645	2	3	3	9	304	33.9	7.01
Q3T145	Malate dehydrogenase, cytoplasmic OS=Bos taurus GN=MDH1 PE=2 SV=3 - [MDHC_BOVIN]	360.54	0.1407	1	1	3	9	334	36.4	6.58
G3H577	Ganglioside GM2 activator OS=Cricetulus griseus GN=I79_005452 PE=4 SV=1 - [G3H577_CRIGR]	66.49	0.1309	4	2	2	9	191	20.8	6.73
G3HF46	Polypyrimidine tract-binding protein 1 OS=Cricetulus griseus GN=I79_009199 PE=4 SV=1 - [G3HF46_CRIGR]	130.77	0.1061	5	4	4	9	528	56.7	9.38
G3I2D8	Band 4.1-like protein 2 OS=Cricetulus griseus GN=I79_017569 PE=4 SV=1 - [G3I2D8_CRIGR]	34.68	0.0649	1	5	5	9	1032	115.5	5.36
G3IPB5	Pre-mRNA-processing-splicing factor 8 OS=Cricetulus griseus GN=I79_025821 PE=4 SV=1 - [G3IPB5_CRIGR]	78.61	0.0568	1	2	2	9	264	30.1	7.24
G3GU92	Lupus La protein-like OS=Cricetulus griseus GN=I79_001246 PE=4 SV=1 - [G3GU92_CRIGR]	257.31	0.086	2	3	3	9	407	46.8	9.69
G3HW57	Cell division protein kinase 4 OS=Cricetulus griseus GN=I79_015205 PE=4 SV=1 - [G3HW57_CRIGR]	91.93	0.0463	22	1	2	9	367	40.7	6.33
G3IKW4	GDP-L-fucose synthetase OS=Cricetulus griseus GN=I79_024518 PE=3 SV=1 - [G3IKW4_CRIGR]	262.25	0.0935	1	3	3	9	321	35.8	7.09
G3I1K4	Beta-1,4-galactosyltransferase 4 OS=Cricetulus griseus GN=I79_017266 PE=4 SV=1 - [G3I1K4_CRIGR]	168.54	0.0523	1	2	2	9	344	39.9	8.7
G3IIA1	Methylosome protein 50 (Fragment) OS=Cricetulus griseus GN=I79_023569 PE=4 SV=1 - [G3IIA1_CRIGR]	108.51	0.0247	2	1	1	9	283	29.8	4.82
G3I8W2	Beta-1,4-galactosyltransferase 1 OS=Cricetulus griseus GN=I79_019994 PE=4 SV=1 - [G3I8W2_CRIGR]	65.66	0.031	4	1	1	9	258	30.1	8.92
A5PK65	D-dopachrome decarboxylase OS=Bos taurus GN=DDT PE=3 SV=1 - [DOPD_BOVIN]	88.85	0.0593	2	1	1	9	118	12.9	7.2
G3HMY0	Hydroxymethylglutaryl-CoA synthase, cytoplasmic OS=Cricetulus griseus GN=I79_012110 PE=4 SV=1 - [G3HMY0_CRIGR]	101.5	0.0808	3	4	4	9	520	57.3	5.66
G3IMV1	40S ribosomal protein S6 OS=Cricetulus griseus GN=I79_025249 PE=4 SV=1 - [G3IMV1_CRIGR]	193.2	0.1901	5	2	2	9	121	13.6	9.95
G3H705	Cystatin-C OS=Cricetulus griseus GN=I79_006129 PE=4 SV=1 - [G3H705_CRIGR]	314.76	0.2059	1	3	3	9	102	11.1	9.41
G3HN65	Ras suppressor protein 1 OS=Cricetulus griseus GN=I79_012198 PE=4 SV=1 - [G3HN65_CRIGR]	179.13	0.1516	2	3	3	9	277	31.5	8.63
G3HP03	RNA-binding protein EWS OS=Cricetulus griseus GN=I79_012504 PE=4 SV=1 - [G3HP03_CRIGR]	146.21	0.0442	1	2	2	9	656	68.5	9.33
G3GYZ1	CD44 antigen OS=Cricetulus griseus GN=I79_003042 PE=4 SV=1 - [G3GYZ1_CRIGR]	57.24	0.071	1	1	2	9	493	54	4.86
G3IIT6	Cysteinyl-tRNA synthetase, cytoplasmic OS=Cricetulus griseus GN=I79_023763 PE=4 SV=1 - [G3IIT6_CRIGR]	298.37	0.0746	1	4	4	9	684	78.5	6.07
G3HW66	Multiple inositol polyphosphate phosphatase 1 OS=Cricetulus griseus GN=I79_015216 PE=4 SV=1 - [G3HW66_CRIGR]	105.88	0.1241	1	2	2	9	274	31.6	6.23
G3HR88	Integral membrane protein 2B OS=Cricetulus griseus GN=I79_013351 PE=4 SV=1 - [G3HR88_CRIGR]	255.42	0.0714	2	2	2	9	266	30.3	5.14
G3IH20	Alpha-1,6-mannosyl-glycoprotein 2-beta-N-acetylglucosaminyltransferase OS=Cricetulus griseus GN=I79_023098 PE=4 SV=1 - [G3IH20_CRIGR]	96.14	0.052	1	2	2	9	442	51.2	8.6
G3GTC7	Malic enzyme (Fragment) OS=Cricetulus griseus GN=I79_000906 PE=3 SV=1 - [G3GTC7_CRIGR]	208.98	0.1065	1	2	2	9	291	32.7	5.59
G3H2W6	Extracellular matrix protein 1 OS=Cricetulus griseus GN=I79_004569 PE=4 SV=1 - [G3H2W6_CRIGR]	416.38	0.0746	1	4	4	9	563	63.2	6.8
G3HRX0	Sorcin (Fragment) OS=Cricetulus griseus GN=I79_013594 PE=4 SV=1 - [G3HRX0_CRIGR]	128.68	0.094	1	1	1	9	117	13.4	8.48
G3HSA2	Myb-binding protein 1A OS=Cricetulus griseus GN=I79_013731 PE=4 SV=1 - [G3HSA2_CRIGR]	155.97	0.029	1	2	2	9	932	105.1	9.06
G3I3H2	60S acidic ribosomal protein P2 OS=Cricetulus griseus GN=I79_017979 PE=3 SV=1 - [G3I3H2_CRIGR]	263.02	0.4174	3	2	3	9	115	11.7	4.54
G3H0T1	Eukaryotic translation initiation factor 3 subunit J OS=Cricetulus griseus GN=I79_003749 PE=4 SV=1 - [G3H0T1_CRIGR]	384.33	0.2252	1	1	2	9	111	12.6	6.71
G3H229	GMP synthase [glutamine-hydrolyzing] OS=Cricetulus griseus GN=I79_004230 PE=4 SV=1 - [G3H229_CRIGR]	151.69	0.0569	1	4	4	9	1159	129.9	6.16
Q765N9	Claudin-3 OS=Bos taurus GN=CLDN3 PE=2 SV=1 - [CLD3_BOVIN]	61.79	0.1324	5	2	3	9	219	23.4	7.77
G3HWL5	Vacuolar protein sorting-associated protein 28-like OS=Cricetulus griseus GN=I79_015347 PE=4 SV=1 - [G3HWL5_CRIGR]	94.29	0.2851	2	4	4	9	221	25.5	5.54
G3I769	Liver carboxylesterase OS=Cricetulus griseus GN=I79_019354 PE=4 SV=1 - [G3I769_CRIGR]	23.65	0.0459	1	1	2	9	545	60.2	6.43
G3IEG2	Serpin B6 OS=Cricetulus griseus GN=I79_022109 PE=3 SV=1 - [G3IEG2_CRIGR]	130.25	0.1032	1	4	4	9	378	43.1	5.94
Q3T0F4	40S ribosomal protein S10 OS=Bos taurus GN=RPS10 PE=2 SV=1 - [RS10_BOVIN]	151.82	0.1515	2	2	2	8	165	18.9	10.15
A6H769	40S ribosomal protein S7 OS=Bos taurus GN=RPS7 PE=2 SV=1 - [RS7_BOVIN]	184.78	0.2784	2	4	4	8	194	22.1	10.1
G3HIY3	40S ribosomal protein S23 OS=Cricetulus griseus GN=I79_010614 PE=3 SV=1 - [G3HIY3_CRIGR]	242.04	0.1608	2	2	2	8	143	15.8	10.49
Q3T0D5	60S ribosomal protein L30 OS=Bos taurus GN=RPL30 PE=3 SV=3 - [RL30_BOVIN]	130.06	0.3739	7	3	3	8	115	12.8	9.63
G3HX83	Ras-related protein Rab-14 OS=Cricetulus griseus GN=I79_015602 PE=3 SV=1 - [G3HX83_CRIGR]	93.04	0.1721	23	2	3	8	215	23.9	6.21
G3HVL1	Cell division control protein 2-like OS=Cricetulus griseus GN=I79_015000 PE=4 SV=1 - [G3HVL1_CRIGR]	113.19	0.064	25	1	2	8	297	34.1	8.41
G3HP80	Vesicle-trafficking protein SEC22b OS=Cricetulus griseus GN=I79_012586 PE=4 SV=1 - [G3HP80_CRIGR]	193.09	0.0837	1	2	2	8	215	24.7	8.51
G3GV75	Ras-related protein Ral-A OS=Cricetulus griseus GN=I79_001606 PE=4 SV=1 - [G3GV75_CRIGR]	161.91	0.1117	2	3	3	8	206	23.5	7.11
P01250	Thymopoietin-2 OS=Bos taurus PE=1 SV=1 - [THP2_BOVIN]	329.27	0.5714	3	2	2	8	49	5.6	5.26
Q2TBX2	Prefoldin subunit 3 OS=Bos taurus GN=VBP1 PE=2 SV=1 - [PFD3_BOVIN]	131.65	0.1777	2	1	2	8	197	22.5	7.11
A5PK63	40S ribosomal protein S17 OS=Bos taurus GN=RPS17 PE=2 SV=1 - [RS17_BOVIN]	25.83	0.163	2	2	2	8	135	15.6	9.73
Q5E964	26S proteasome non-ATPase regulatory subunit 13 OS=Bos taurus GN=PSMD13 PE=2 SV=1 - [PSD13_BOVIN]	231.54	0.1064	1	1	3	8	376	42.8	5.69
A5D7I4	Exostosin-1 OS=Bos taurus GN=EXT1 PE=2 SV=1 - [EXT1_BOVIN]	133.53	0.0268	2	2	2	8	746	86.2	9.04
A7MBG0	Adenylosuccinate synthetase isozyme 2 OS=Bos taurus GN=ADSS PE=2 SV=2 - [PURA2_BOVIN]	338.38	0.0307	1	1	1	8	456	50.1	6.73
G3H953	KH domain-containing, RNA-binding, signal transduction-associated protein 1 OS=Cricetulus griseus GN=I79_006915 PE=4 SV=1 - [G3H953_CRIGR]	44.54	0.0767	3	3	3	8	443	48.3	8.66
G3HWW8	Syntaxin-binding protein 2 OS=Cricetulus griseus GN=I79_015481 PE=4 SV=1 - [G3HWW8_CRIGR]	121.1	0.0842	1	4	4	8	594	66.6	6.81
G3IE04	Pre-mRNA-processing factor 19 OS=Cricetulus griseus GN=I79_021945 PE=4 SV=1 - [G3IE04_CRIGR]	128.78	0.0616	1	1	3	8	487	53.4	6.61
G3HD57	Syntenin-1 OS=Cricetulus griseus GN=I79_008432 PE=4 SV=1 - [G3HD57_CRIGR]	57.18	0.1007	1	3	3	8	298	32.3	7.15
G3GR90	Isopentenyl-diphosphate Delta-isomerase 1 OS=Cricetulus griseus GN=I79_000033 PE=4 SV=1 - [G3GR90_CRIGR]	73.29	0.2386	3	5	5	8	285	32.7	7.52
Q3SZ90	60S ribosomal protein L13a OS=Bos taurus GN=RPL13A PE=2 SV=3 - [RL13A_BOVIN]	57.34	0.1724	3	2	4	8	203	23.5	11.11
G3H8C9	Semaphorin-3B OS=Cricetulus griseus GN=I79_006629 PE=4 SV=1 - [G3H8C9_CRIGR]	198.63	0.032	1	2	2	8	749	83	8.38
G3ILX2	26S proteasome non-ATPase regulatory subunit 13 OS=Cricetulus griseus GN=I79_024894 PE=4 SV=1 - [G3ILX2_CRIGR]	82.35	0.202	1	2	2	8	99	11.5	7.44
G3IMK2	Tight junction protein ZO-2 OS=Cricetulus griseus GN=I79_025142 PE=4 SV=1 - [G3IMK2_CRIGR]	137.01	0.0841	2	4	4	8	464	53	6.7
G3IDL3	Interferon-inducible protein OS=Cricetulus griseus GN=I79_021796 PE=4 SV=1 - [G3IDL3_CRIGR]	180.09	0.0584	2	1	1	8	137	15	8.31
G3HM03	Synaptic vesicle membrane protein VAT-1-like OS=Cricetulus griseus GN=I79_011747 PE=4 SV=1 - [G3HM03_CRIGR]	248.74	0.1042	1	3	3	8	259	28.5	7.59
G3HDV7	Leucine-rich repeat-containing protein 16A OS=Cricetulus griseus GN=I79_008723 PE=4 SV=1 - [G3HDV7_CRIGR]	77.02	0.0193	1	2	2	8	1449	160.2	8.05
G3HFG4	60S ribosomal protein L4 OS=Cricetulus griseus GN=I79_009303 PE=4 SV=1 - [G3HFG4_CRIGR]	62.04	0.1373	3	1	2	8	204	23.9	10.81
G3I979	40S ribosomal protein S25 (Fragment) OS=Cricetulus griseus GN=I79_020113 PE=4 SV=1 - [G3I979_CRIGR]	115.07	0.2439	6	3	3	8	123	13.5	10.11
G3HT06	L-lactate dehydrogenase A chain OS=Cricetulus griseus GN=I79_014006 PE=3 SV=1 - [G3HT06_CRIGR]	247.68	0.1548	1	1	2	8	84	9.2	5.06
G3H256	26S proteasome non-ATPase regulatory subunit 9 OS=Cricetulus griseus GN=I79_004301 PE=4 SV=1 - [G3H256_CRIGR]	109.24	0.1667	2	3	3	8	222	24.6	6.65
G3GUP7	Ubiquitin carboxyl-terminal hydrolase OS=Cricetulus griseus GN=I79_001414 PE=3 SV=1 - [G3GUP7_CRIGR]	110.86	0.0886	1	5	5	8	835	93.3	5.06
G3HV73	Poly [ADP-ribose] polymerase 1 OS=Cricetulus griseus GN=I79_014850 PE=4 SV=1 - [G3HV73_CRIGR]	49.69	0.0216	2	2	2	8	971	107.6	8.85
G3I4G8	BolA-like protein 2 OS=Cricetulus griseus GN=I79_018347 PE=3 SV=1 - [G3I4G8_CRIGR]	130.39	0.1047	1	1	1	8	86	10.1	6.15
G3HID3	Coatomer subunit gamma OS=Cricetulus griseus GN=I79_010394 PE=3 SV=1 - [G3HID3_CRIGR]	102.46	0.0618	1	3	4	8	874	97.5	5.39
G3GYK8	26S protease regulatory subunit 6A OS=Cricetulus griseus GN=I79_002888 PE=3 SV=1 - [G3GYK8_CRIGR]	141.62	0.1547	1	3	3	8	265	29.5	5.8
G3HLX3	Alpha-N-acetylglucosaminidase OS=Cricetulus griseus GN=I79_011717 PE=4 SV=1 - [G3HLX3_CRIGR]	336.31	0.0365	1	2	2	8	740	83.4	6.74
G3HCH0	UPF0556 protein C19orf10-like OS=Cricetulus griseus GN=I79_008180 PE=4 SV=1 - [G3HCH0_CRIGR]	178.86	0.0542	2	1	1	8	166	18	6.3
G3HHE3	Leucyl-tRNA synthetase, cytoplasmic OS=Cricetulus griseus GN=I79_010043 PE=3 SV=1 - [G3HHE3_CRIGR]	101.29	0.0536	1	4	4	8	727	83.4	7.42
G3I3B7	Ribonucleoside-diphosphate reductase OS=Cricetulus griseus GN=I79_017921 PE=3 SV=1 - [G3I3B7_CRIGR]	217.96	0.0518	1	3	3	8	792	90.2	6.83
G3HV83	Prefoldin subunit 3 OS=Cricetulus griseus GN=I79_014862 PE=4 SV=1 - [G3HV83_CRIGR]	139.75	0.0753	2	1	2	8	292	34.8	9
G3HIQ3	Activated RNA polymerase II transcriptional coactivator p15 OS=Cricetulus griseus GN=I79_010528 PE=4 SV=1 - [G3HIQ3_CRIGR]	179.98	0.2881	2	2	2	8	59	7	6.71
Q32KV6	Nucleotide exchange factor SIL1 OS=Bos taurus GN=SIL1 PE=2 SV=1 - [SIL1_BOVIN]	322.53	0.0714	1	1	3	8	462	52.5	5.74
G3IEK4	Angio-associated migratory cell protein OS=Cricetulus griseus GN=I79_022151 PE=4 SV=1 - [G3IEK4_CRIGR]	150.64	0.0334	2	1	1	8	389	42.1	4.6
G3IA91	Protein NDRG1 OS=Cricetulus griseus GN=I79_020508 PE=4 SV=1 - [G3IA91_CRIGR]	234.27	0.1179	3	2	2	8	263	28.9	5.53
G3I7T9	Guanine nucleotide-binding protein subunit gamma OS=Cricetulus griseus GN=I79_019587 PE=3 SV=1 - [G3I7T9_CRIGR]	65.24	0.4167	2	2	2	8	72	8	8.97
G3GWT7	Guanine nucleotide-binding protein G(S) subunit alpha isoforms XLas OS=Cricetulus griseus GN=I79_002218 PE=4 SV=1 - [G3GWT7_CRIGR]	206.49	0.0478	3	1	1	8	335	39	5.27
G3IBK8	V-type proton ATPase subunit S1 OS=Cricetulus griseus GN=I79_021034 PE=4 SV=1 - [G3IBK8_CRIGR]	281.69	0.0612	2	2	2	8	441	48.9	5.97
G3I519	Latexin OS=Cricetulus griseus GN=I79_018559 PE=4 SV=1 - [G3I519_CRIGR]	162.97	0.1622	1	2	2	8	222	25.4	6.09
G3H310	Arylsulfatase B OS=Cricetulus griseus GN=I79_004616 PE=4 SV=1 - [G3H310_CRIGR]	27.51	0.2111	1	1	1	8	90	10.6	6.24
G3H037	U5 small nuclear ribonucleoprotein 200 kDa helicase OS=Cricetulus griseus GN=I79_003485 PE=4 SV=1 - [G3H037_CRIGR]	163.08	0.0218	1	3	3	8	1377	158.1	5.97
G3ICW1	Osteoclast-stimulating factor 1 OS=Cricetulus griseus GN=I79_021516 PE=4 SV=1 - [G3ICW1_CRIGR]	164.47	0.1449	2	3	3	8	214	23.7	5.68
G3IMZ0	Very low-density lipoprotein receptor OS=Cricetulus griseus GN=I79_025297 PE=4 SV=1 - [G3IMZ0_CRIGR]	91.11	0.1004	1	4	4	8	558	61.8	4.75
G3I7M1	Ataxin-2-like protein OS=Cricetulus griseus GN=I79_019514 PE=4 SV=1 - [G3I7M1_CRIGR]	175.12	0.051	1	3	3	8	862	90.9	8.02
G3INN8	Microtubule-associated protein 6 OS=Cricetulus griseus GN=I79_025566 PE=4 SV=1 - [G3INN8_CRIGR]	30.57	0.1048	1	1	1	8	477	50.4	9.33
G3I179	26S proteasome non-ATPase regulatory subunit 14 OS=Cricetulus griseus GN=I79_017128 PE=4 SV=1 - [G3I179_CRIGR]	79.34	0.0839	1	3	3	7	310	34.6	6.52
Q2HJ58	Ribose-phosphate pyrophosphokinase 1 OS=Bos taurus GN=PRPS1 PE=2 SV=3 - [PRPS1_BOVIN]	53.95	0.1289	4	3	3	7	318	34.8	6.98
G3HDD4	NEDD8 OS=Cricetulus griseus GN=I79_008538 PE=4 SV=1 - [G3HDD4_CRIGR]	109.57	0.1728	2	1	1	7	81	9	7.25
Q2KIS1	N-acylglucosamine 2-epimerase OS=Bos taurus GN=RENBP PE=2 SV=2 - [RENBP_BOVIN]	111.17	0.0139	2	1	1	7	432	49.3	6.09
P35445	Cartilage oligomeric matrix protein OS=Bos taurus GN=COMP PE=1 SV=2 - [COMP_BOVIN]	112.98	0.0661	1	2	2	7	756	82.3	4.61
G3I6W5	Prefoldin subunit 6 OS=Cricetulus griseus GN=I79_019243 PE=4 SV=1 - [G3I6W5_CRIGR]	141.46	0.0945	2	1	1	7	127	14.4	8.88
Q58DW0	60S ribosomal protein L4 OS=Bos taurus GN=RPL4 PE=2 SV=3 - [RL4_BOVIN]	102.09	0.1185	3	2	3	7	422	47.4	10.96
Q32PA4	14 kDa phosphohistidine phosphatase OS=Bos taurus GN=PHPT1 PE=2 SV=1 - [PHP14_BOVIN]	259.17	0.12	1	1	1	7	125	13.9	5.82
Q59A32	Trifunctional purine biosynthetic protein adenosine-3 OS=Bos taurus GN=GART PE=2 SV=1 - [PUR2_BOVIN]	235.33	0.0376	1	1	3	7	1010	107.8	6.39
O77588	Procollagen-lysine,2-oxoglutarate 5-dioxygenase 1 OS=Bos taurus GN=PLOD1 PE=2 SV=2 - [PLOD1_BOVIN]	123.72	0.0647	2	4	4	7	726	83.4	6.62
Q7SIB3	Collagen alpha-2(IV) chain (Fragment) OS=Bos taurus GN=COL4A2 PE=1 SV=1 - [CO4A2_BOVIN]	98.54	0.1366	2	2	2	7	227	25	6.61
Q28084	Collagen alpha-3(IV) chain (Fragment) OS=Bos taurus GN=COL4A3 PE=1 SV=1 - [CO4A3_BOVIN]	78.27	0.0212	1	1	1	7	471	47.6	8.13
A7MBJ4	Receptor-type tyrosine-protein phosphatase F OS=Bos taurus GN=PTPRF PE=2 SV=1 - [PTPRF_BOVIN]	50.96	0.0121	3	2	2	7	1898	211.2	6.52
Q27954	Coatomer subunit alpha OS=Bos taurus GN=COPA PE=1 SV=1 - [COPA_BOVIN]	86.05	0.0441	2	4	4	7	1224	138.3	7.66
Q0VCU8	Eukaryotic translation initiation factor 3 subunit J OS=Bos taurus GN=EIF3J PE=2 SV=1 - [EIF3J_BOVIN]	225.64	0.0898	1	1	2	7	256	28.9	4.83
P12378	UDP-glucose 6-dehydrogenase OS=Bos taurus GN=UGDH PE=1 SV=2 - [UGDH_BOVIN]	115.32	0.0486	1	1	2	7	494	55.1	7.58
Q08E38	Pre-mRNA-processing factor 19 OS=Bos taurus GN=PRPF19 PE=2 SV=1 - [PRP19_BOVIN]	160.33	0.0913	1	1	3	7	504	55.2	6.61
A6H7I5	Dynamin-2 OS=Bos taurus GN=DNM2 PE=2 SV=1 - [DYN2_BOVIN]	46.22	0.0219	5	2	2	7	866	97.8	7.62
G3H8H3	Nck-associated protein 1 (Fragment) OS=Cricetulus griseus GN=I79_006673 PE=4 SV=1 - [G3H8H3_CRIGR]	44.17	0.0368	1	3	3	7	951	109	6.51
G3HZA8	Glyceraldehyde-3-phosphate dehydrogenase OS=Cricetulus griseus GN=I79_016405 PE=3 SV=1 - [G3HZA8_CRIGR]	279.18	0.0825	1	1	1	7	206	22.4	8.41
G3GYV4	Ribosome biogenesis protein WDR12 OS=Cricetulus griseus GN=Wdr12 PE=3 SV=1 - [G3GYV4_CRIGR]	44.55	0.0496	2	2	2	7	423	47.6	5.8
G3HZW3	60S ribosomal protein L18 OS=Cricetulus griseus GN=I79_016627 PE=4 SV=1 - [G3HZW3_CRIGR]	247.87	0.1912	2	2	2	7	136	15.2	11.81
G3HYK9	60S ribosomal protein L7a (Fragment) OS=Cricetulus griseus GN=I79_016147 PE=4 SV=1 - [G3HYK9_CRIGR]	112.85	0.3239	15	2	4	7	176	19.7	9.74
G3HRT6	Solute carrier family 12 member 1 OS=Cricetulus griseus GN=I79_013558 PE=4 SV=1 - [G3HRT6_CRIGR]	143.44	0.0118	1	1	1	7	1191	130.6	7.17
G3IE25	Clathrin light chain A OS=Cricetulus griseus GN=I79_021967 PE=4 SV=1 - [G3IE25_CRIGR]	117.53	0.2	5	2	2	7	140	16.3	4.98
G3H853	cAMP-dependent protein kinase type I-alpha regulatory subunit OS=Cricetulus griseus GN=I79_006551 PE=4 SV=1 - [G3H853_CRIGR]	91.95	0.1391	2	3	3	7	381	43.1	5.35
G3GVD4	Trinucleotide repeat-containing gene 18 protein OS=Cricetulus griseus GN=I79_001670 PE=4 SV=1 - [G3GVD4_CRIGR]	96.35	0.0075	1	1	1	7	1073	114	9.26
G3H5T7	Chromobox protein-like 1 OS=Cricetulus griseus GN=I79_005678 PE=4 SV=1 - [G3H5T7_CRIGR]	143.48	0.1211	1	2	3	7	289	32.4	5.19
G3H5C9	40S ribosomal protein S27 OS=Cricetulus griseus GN=I79_005510 PE=3 SV=1 - [G3H5C9_CRIGR]	122.22	0.25	6	2	2	7	84	9.6	9.6
G3H928	Adenylate kinase 2, mitochondrial OS=Cricetulus griseus GN=I79_006890 PE=3 SV=1 - [G3H928_CRIGR]	154.62	0.1549	3	2	2	7	142	15.4	7.85
G3H7V9	DNA replication licensing factor MCM2 OS=Cricetulus griseus GN=I79_006453 PE=3 SV=1 - [G3H7V9_CRIGR]	238.12	0.053	2	4	4	7	905	102.1	5.59
G3H319	Tubulin-specific chaperone A OS=Cricetulus griseus GN=I79_004625 PE=4 SV=1 - [G3H319_CRIGR]	110.15	0.25	2	2	2	7	84	9.9	4.65
G3HY23	Small nuclear ribonucleoprotein Sm D3 OS=Cricetulus griseus GN=I79_015922 PE=4 SV=1 - [G3HY23_CRIGR]	199.16	0.2262	1	2	2	7	84	9.3	11.94
G3H910	Mannosyl-oligosaccharide 1,2-alpha-mannosidase IB OS=Cricetulus griseus GN=I79_006871 PE=4 SV=1 - [G3H910_CRIGR]	176.54	0.039	1	2	2	7	641	72.9	8.12
G3HSG3	Tenascin OS=Cricetulus griseus GN=I79_013794 PE=4 SV=1 - [G3HSG3_CRIGR]	150.06	0.0209	1	4	4	7	2202	241.1	4.89
G3ILK7	Calsyntenin-1 OS=Cricetulus griseus GN=I79_024775 PE=4 SV=1 - [G3ILK7_CRIGR]	46.23	0.024	1	2	2	7	832	92.2	4.81
G3GXG0	Cullin-1 OS=Cricetulus griseus GN=I79_002450 PE=3 SV=1 - [G3GXG0_CRIGR]	124.58	0.0361	1	3	3	7	776	89.7	8
G3I431	von Willebrand factor A domain-containing protein 1 OS=Cricetulus griseus GN=I79_018210 PE=4 SV=1 - [G3I431_CRIGR]	157.02	0.1054	1	3	3	7	446	48.2	6.96
Q0IIF2	Translation initiation factor eIF-2B subunit alpha OS=Bos taurus GN=EIF2B1 PE=2 SV=1 - [EI2BA_BOVIN]	190.58	0.082	2	2	2	7	305	33.8	7.33
A6QLI0	Mammalian ependymin-related protein 1 OS=Bos taurus GN=EPDR1 PE=2 SV=1 - [EPDR1_BOVIN]	230.73	0.0847	2	2	2	7	236	26.5	7.8
G3HKV9	Group XV phospholipase A2 OS=Cricetulus griseus GN=I79_011341 PE=4 SV=1 - [G3HKV9_CRIGR]	57.3	0.0704	1	2	2	7	412	47.2	6.52
G3GYY2	Caprin-1 OS=Cricetulus griseus GN=I79_003032 PE=4 SV=1 - [G3GYY2_CRIGR]	159.72	0.0503	2	3	3	7	656	73.6	5.2
G3ILX1	Fibroblast growth factor-binding protein 1 OS=Cricetulus griseus GN=I79_024893 PE=4 SV=1 - [G3ILX1_CRIGR]	139.79	0.1452	1	2	2	7	248	27.9	9.17
G3HQK5	UDP-N-acetylhexosamine pyrophosphorylase OS=Cricetulus griseus GN=I79_013109 PE=4 SV=1 - [G3HQK5_CRIGR]	140.82	0.0709	2	3	3	7	522	58.7	6.49
G3HYD5	Protocadherin-1 OS=Cricetulus griseus GN=I79_016060 PE=4 SV=1 - [G3HYD5_CRIGR]	122.08	0.1005	1	5	5	7	756	82.1	5.38
G3GX38	Putative uncharacterized protein OS=Cricetulus griseus GN=I79_002350 PE=4 SV=1 - [G3GX38_CRIGR]	171.12	0.1236	1	1	1	7	89	10.5	8.19
G3HU10	Prefoldin subunit 2 OS=Cricetulus griseus GN=I79_014378 PE=4 SV=1 - [G3HU10_CRIGR]	299.43	0.0882	1	1	2	7	238	25.7	9.16
G3IKQ9	Osteopontin OS=Cricetulus griseus GN=I79_024462 PE=4 SV=1 - [G3IKQ9_CRIGR]	171.84	0.3248	1	2	2	7	117	13.2	5.66
G3HJJ1	Ribose-5-phosphate isomerase OS=Cricetulus griseus GN=I79_010838 PE=4 SV=1 - [G3HJJ1_CRIGR]	319.61	0.2123	1	3	3	7	179	19.8	7.28
G3H2J7	Chromobox protein-like 3 OS=Cricetulus griseus GN=I79_004410 PE=4 SV=1 - [G3H2J7_CRIGR]	239.01	0.1518	1	1	2	7	191	21.2	7.23
G3ILI6	26S proteasome non-ATPase regulatory subunit 3 OS=Cricetulus griseus GN=I79_024752 PE=4 SV=1 - [G3ILI6_CRIGR]	213.92	0.2269	1	1	2	7	119	13.9	9.5
G3IGT4	Latent-transforming growth factor beta-binding protein 3 OS=Cricetulus griseus GN=I79_023010 PE=4 SV=1 - [G3IGT4_CRIGR]	211.65	0.0593	1	2	2	7	624	68.1	5.07
G3HH63	Phospholipase A-2-activating protein OS=Cricetulus griseus GN=I79_009960 PE=4 SV=1 - [G3HH63_CRIGR]	156.88	0.0478	1	3	3	7	795	87.1	6.16
G3HP64	Sequestosome-1 OS=Cricetulus griseus GN=I79_012570 PE=4 SV=1 - [G3HP64_CRIGR]	213.09	0.0866	1	2	2	7	358	38.9	5.19
G3HD97	Thioredoxin domain-containing protein 5 OS=Cricetulus griseus GN=I79_008476 PE=3 SV=1 - [G3HD97_CRIGR]	301.17	0.1247	1	3	3	7	417	46.3	5.91
G3GTH2	Na(+)/H(+) exchange regulatory cofactor NHE-RF1 OS=Cricetulus griseus GN=I79_000956 PE=1 SV=1 - [G3GTH2_CRIGR]	325.42	0.0876	2	2	2	7	354	38.6	5.9
G3I5W9	DNA-binding protein A OS=Cricetulus griseus GN=I79_018880 PE=4 SV=1 - [G3I5W9_CRIGR]	222.03	0.1845	1	1	1	7	103	11.4	10.55
G3H436	Inosine triphosphate pyrophosphatase OS=Cricetulus griseus GN=Itpa PE=3 SV=1 - [G3H436_CRIGR]	97.76	0.0867	1	1	1	7	196	21.6	7.24
G3HZY0	Glycogen [starch] synthase, muscle OS=Cricetulus griseus GN=I79_016645 PE=4 SV=1 - [G3HZY0_CRIGR]	74.54	0.0162	2	1	1	7	495	56.3	7.23
G3I710	AP-2 complex subunit alpha-1 OS=Cricetulus griseus GN=I79_019291 PE=4 SV=1 - [G3I710_CRIGR]	180.72	0.0317	1	1	3	7	946	104.6	7.66
G3H4S3	Heat shock 70 kDa protein 13 OS=Cricetulus griseus GN=I79_005283 PE=3 SV=1 - [G3H4S3_CRIGR]	146.36	0.0591	2	2	2	7	389	42.5	6.11
G3GWB1	Hepatocyte growth factor activator OS=Cricetulus griseus GN=I79_002031 PE=3 SV=1 - [G3GWB1_CRIGR]	311.63	0.0243	1	1	1	7	658	70.9	7.4
G3GR82	Aldo-keto reductase family 1 member C21 (Fragment) OS=Cricetulus griseus GN=I79_000025 PE=4 SV=1 - [G3GR82_CRIGR]	131.23	0.0131	1	1	1	7	765	87.2	8.53
G3H6Z4	Phosphorylase OS=Cricetulus griseus GN=I79_006118 PE=3 SV=1 - [G3H6Z4_CRIGR]	21.49	0.0824	2	2	5	7	752	85.7	5.91
G3GRV4	Microtubule-associated proteins 1A/1B light chain 3B OS=Cricetulus griseus GN=I79_000248 PE=3 SV=1 - [G3GRV4_CRIGR]	31.1	0.168	4	1	2	7	125	14.6	8.4
G3HGP8	Poly(A)-specific ribonuclease PARN-like domain-containing protein 1 OS=Cricetulus griseus GN=I79_009788 PE=4 SV=1 - [G3HGP8_CRIGR]	86.75	0.0185	1	1	1	7	433	49.9	6.4
G3H9Z3	Putative deoxyribose-phosphate aldolase OS=Cricetulus griseus GN=I79_007226 PE=4 SV=1 - [G3H9Z3_CRIGR]	139.93	0.0645	3	2	2	7	341	37	7.62
G3GZS7	Interleukin-24 OS=Cricetulus griseus GN=I79_003374 PE=4 SV=1 - [G3GZS7_CRIGR]	27.17	0.05	1	1	1	7	160	18.5	9.23
G3ID93	WD repeat-containing protein 5 OS=Cricetulus griseus GN=I79_021666 PE=4 SV=1 - [G3ID93_CRIGR]	183.16	0.0808	2	2	2	6	334	36.6	8.27
Q5E988	40S ribosomal protein S5 OS=Bos taurus GN=RPS5 PE=2 SV=3 - [RS5_BOVIN]	337.82	0.0735	1	1	1	6	204	22.9	9.72
P62194	26S protease regulatory subunit 8 OS=Bos taurus GN=PSMC5 PE=2 SV=1 - [PRS8_BOVIN]	39.93	0.1133	2	3	3	6	406	45.6	7.55
P61284	60S ribosomal protein L12 OS=Bos taurus GN=RPL12 PE=2 SV=1 - [RL12_BOVIN]	323.72	0.1879	1	1	2	6	165	17.8	9.42
G3HQB7	Small nuclear ribonucleoprotein E OS=Cricetulus griseus GN=I79_013014 PE=4 SV=1 - [G3HQB7_CRIGR]	126.53	0.3913	2	2	2	6	92	10.8	9.44
G3HLY6	Vacuolar protein-sorting-associated protein 25 OS=Cricetulus griseus GN=I79_011730 PE=4 SV=1 - [G3HLY6_CRIGR]	32.68	0.108	2	2	2	6	176	20.7	6.34
Q28065	C4b-binding protein alpha chain OS=Bos taurus GN=C4BPA PE=2 SV=1 - [C4BPA_BOVIN]	84.44	0.0475	1	2	2	6	610	68.8	6.38
Q0V8B6	Tripeptidyl-peptidase 1 OS=Bos taurus GN=TPP1 PE=2 SV=1 - [TPP1_BOVIN]	66.46	0.0142	1	1	1	6	563	61.3	6.77
P26884	Peptidyl-prolyl cis-trans isomerase FKBP3 OS=Bos taurus GN=FKBP3 PE=1 SV=2 - [FKBP3_BOVIN]	29.76	0.1607	2	3	3	6	224	25.2	9.28
P45478	Palmitoyl-protein thioesterase 1 OS=Bos taurus GN=PPT1 PE=1 SV=1 - [PPT1_BOVIN]	136.41	0.0425	1	1	1	6	306	34.1	6.79
Q2KIW6	26S protease regulatory subunit 10B OS=Bos taurus GN=PSMC6 PE=2 SV=1 - [PRS10_BOVIN]	67.04	0.1131	2	3	3	6	389	44	7.2
Q5E9G3	Proteasome activator complex subunit 2 OS=Bos taurus GN=PSME2 PE=1 SV=3 - [PSME2_BOVIN]	137.94	0.0795	1	1	2	6	239	27.4	5.43
Q2KJG3	Asparagine--tRNA ligase, cytoplasmic OS=Bos taurus GN=NARS PE=2 SV=3 - [SYNC_BOVIN]	138.23	0.0394	1	1	2	6	559	64.4	6.74
P13135	Calpain small subunit 1 OS=Bos taurus GN=CAPNS1 PE=2 SV=1 - [CPNS1_BOVIN]	131	0.1065	2	3	3	6	263	27.9	5.2
G3H846	UPF0124 protein C13orf31-like OS=Cricetulus griseus GN=I79_006544 PE=4 SV=1 - [G3H846_CRIGR]	119.18	0.0398	12	1	2	6	427	47.5	6.79
G3IP93	Vitronectin OS=Cricetulus griseus GN=I79_025798 PE=4 SV=1 - [G3IP93_CRIGR]	181.64	0.0652	2	1	1	6	230	25.7	4.61
G3HVZ2	Protocadherin Fat 1 OS=Cricetulus griseus GN=I79_015138 PE=4 SV=1 - [G3HVZ2_CRIGR]	171.68	0.005	1	2	2	6	4589	506.4	4.97
G3I319	AP-2 complex subunit mu-1 OS=Cricetulus griseus GN=I79_017819 PE=4 SV=1 - [G3I319_CRIGR]	63.03	0.0739	2	3	3	6	433	49.3	9.54
G3HMV2	60S ribosomal protein L11 OS=Cricetulus griseus GN=I79_012069 PE=3 SV=1 - [G3HMV2_CRIGR]	187.41	0.1292	3	2	2	6	178	20.3	9.6
G3HFF0	Solute carrier family 2, facilitated glucose transporter member 1 (Fragment) OS=Cricetulus griseus GN=I79_009336 PE=3 SV=1 - [G3HFF0_CRIGR]	121.7	0.0494	4	3	3	6	486	53.3	8.73
G3HAP1	Microtubule-associated proteins 1A/1B light chain 3A OS=Cricetulus griseus GN=I79_007497 PE=3 SV=1 - [G3HAP1_CRIGR]	58.78	0.0683	4	1	2	6	278	31.5	7.4
G3HV50	Prefoldin subunit 5 OS=Cricetulus griseus GN=I79_014827 PE=3 SV=1 - [G3HV50_CRIGR]	231.79	0.3896	2	4	4	6	154	17.3	6.33
Q3T0I2	Pro-cathepsin H OS=Bos taurus GN=CTSH PE=2 SV=1 - [CATH_BOVIN]	69.48	0.0537	2	2	2	6	335	37.3	7.96
G3GTY5	60S ribosomal protein L23a OS=Cricetulus griseus GN=I79_001127 PE=4 SV=1 - [G3GTY5_CRIGR]	73.03	0.3134	15	2	2	6	67	7.6	8.43
G3GWM0	Eukaryotic peptide chain release factor GTP-binding subunit ERF3B OS=Cricetulus griseus GN=I79_002147 PE=4 SV=1 - [G3GWM0_CRIGR]	37.76	0.0599	2	3	3	6	584	65.3	6.3
G3IND2	26S proteasome non-ATPase regulatory subunit 13 OS=Cricetulus griseus GN=I79_025448 PE=4 SV=1 - [G3IND2_CRIGR]	73.88	0.1172	1	1	3	6	273	30.9	5.6
G3IGT5	Sjoegren syndrome/scleroderma autoantigen 1 OS=Cricetulus griseus GN=I79_023011 PE=4 SV=1 - [G3IGT5_CRIGR]	69.7	0.0402	1	1	1	6	199	21.4	5.24
G3H9Y7	NudC domain-containing protein 2 OS=Cricetulus griseus GN=I79_007220 PE=4 SV=1 - [G3H9Y7_CRIGR]	198.73	0.1847	1	2	2	6	157	17.7	5.07
G3H7F8	Acidic leucine-rich nuclear phosphoprotein 32 family member B (Fragment) OS=Cricetulus griseus GN=I79_006289 PE=4 SV=1 - [G3H7F8_CRIGR]	215.33	0.1127	1	2	2	6	213	24.2	3.81
G3HIT7	Microtubule-associated protein 1B OS=Cricetulus griseus GN=I79_010564 PE=4 SV=1 - [G3HIT7_CRIGR]	171.17	0.0257	2	4	4	6	2371	260.2	4.79
G3HW09	60S ribosomal protein L23 OS=Cricetulus griseus GN=I79_015156 PE=3 SV=1 - [G3HW09_CRIGR]	64.46	0.0988	2	1	1	6	81	9	9.76
G3HYI7	Splicing factor U2AF 65 kDa subunit OS=Cricetulus griseus GN=I79_016120 PE=4 SV=1 - [G3HYI7_CRIGR]	121.22	0.0616	1	2	2	6	422	45.7	4.93
G3HFJ1	Scavenger mRNA-decapping enzyme DcpS OS=Cricetulus griseus GN=I79_009349 PE=4 SV=1 - [G3HFJ1_CRIGR]	74.14	0.1091	2	3	3	6	339	38.7	6.24
G3H352	Cytoplasmic dynein 1 heavy chain 1 (Fragment) OS=Cricetulus griseus GN=I79_004663 PE=4 SV=1 - [G3H352_CRIGR]	209.18	0.0074	1	2	2	6	4592	526.5	6.54
G3HNR0	Flavin reductase OS=Cricetulus griseus GN=I79_012403 PE=4 SV=1 - [G3HNR0_CRIGR]	104.38	0.4722	1	2	2	6	72	8.1	8.25
G3HLR7	Adenosine deaminase OS=Cricetulus griseus GN=I79_011661 PE=3 SV=1 - [G3HLR7_CRIGR]	149.64	0.1267	2	3	3	6	363	40.9	5.92
G3HUU7	Protein S100-A10 OS=Cricetulus griseus GN=I79_014715 PE=4 SV=1 - [G3HUU7_CRIGR]	88.48	0.1031	1	1	1	6	97	11.2	6.77
G3H2I6	Neural cell adhesion molecule 1 OS=Cricetulus griseus GN=I79_004399 PE=4 SV=1 - [G3H2I6_CRIGR]	224.47	0.0205	2	2	2	6	1071	114.2	4.83
G3ILP4	60S ribosomal protein L9 OS=Cricetulus griseus GN=I79_024815 PE=4 SV=1 - [G3ILP4_CRIGR]	102.78	0.0573	3	2	2	6	192	21.9	9.95
G3H1B3	Lamin-L(I) OS=Cricetulus griseus GN=I79_003938 PE=3 SV=1 - [G3H1B3_CRIGR]	162.54	0.1242	1	4	4	6	483	54.9	4.94
G3HLI6	MAGUK p55 subfamily member 2 OS=Cricetulus griseus GN=I79_011575 PE=3 SV=1 - [G3HLI6_CRIGR]	78.05	0.0157	1	1	1	6	636	71.1	6.86
G3H4Q7	Ras-related protein Rab-21 OS=Cricetulus griseus GN=I79_005264 PE=4 SV=1 - [G3H4Q7_CRIGR]	162.21	0.0885	2	1	1	6	113	12.1	6.3
G3HLT7	WAP four-disulfide core domain protein 2 OS=Cricetulus griseus GN=I79_011680 PE=4 SV=1 - [G3HLT7_CRIGR]	168.75	0.0688	1	1	1	6	160	16.8	5.94
G3I306	Eukaryotic translation initiation factor 4 gamma 1 OS=Cricetulus griseus GN=I79_017805 PE=4 SV=1 - [G3I306_CRIGR]	104.73	0.0264	2	3	3	6	1590	175	5.35
P35604	Coatomer subunit zeta-1 OS=Bos taurus GN=COPZ1 PE=1 SV=2 - [COPZ1_BOVIN]	77.5	0.1412	2	2	2	6	177	20.2	4.81
G3GUB4	Histone acetyltransferase type B catalytic subunit OS=Cricetulus griseus GN=I79_001268 PE=4 SV=1 - [G3GUB4_CRIGR]	116.78	0.2291	1	3	3	6	179	21.4	8.79
G3HSE5	Coatomer subunit beta OS=Cricetulus griseus GN=I79_013776 PE=3 SV=1 - [G3HSE5_CRIGR]	186.7	0.0506	2	3	3	6	870	98.2	5.71
G3HB39	Retinoic acid-induced protein 3 OS=Cricetulus griseus GN=I79_007654 PE=4 SV=1 - [G3HB39_CRIGR]	263.69	0.0763	1	2	2	6	354	39.7	6.54
Q3SZN2	Protein transport protein Sec23B OS=Bos taurus GN=SEC23B PE=2 SV=1 - [SC23B_BOVIN]	134.73	0.0313	1	1	2	6	767	86.4	7.09
G3IJJ0	NHP2-like protein 1 OS=Cricetulus griseus GN=I79_024025 PE=4 SV=1 - [G3IJJ0_CRIGR]	196.97	0.1644	2	1	1	6	73	8	7.85
Q3HR12	Guanine nucleotide binding protein alpha inhibiting 3 OS=Cricetulus griseus GN=GNAI3 PE=2 SV=1 - [Q3HR12_CRIGR]	243.61	0.0847	1	2	2	6	354	40.5	5.69
G3GV42	Asparaginyl-tRNA synthetase, cytoplasmic OS=Cricetulus griseus GN=I79_001573 PE=3 SV=1 - [G3GV42_CRIGR]	144	0.1051	1	1	2	6	314	36.6	5.22
G3IAG1	Guanine nucleotide-binding protein G(Q) subunit alpha OS=Cricetulus griseus GN=I79_020584 PE=4 SV=1 - [G3IAG1_CRIGR]	45.47	0.1318	1	2	2	6	220	25.6	5.69
G3I473	Growth-regulated alpha protein OS=Cricetulus griseus GN=I79_018249 PE=3 SV=1 - [G3I473_CRIGR]	136.04	0.2871	1	2	2	6	101	10.9	9.91
G3HM98	Drebrin-like protein OS=Cricetulus griseus GN=I79_011849 PE=4 SV=1 - [G3HM98_CRIGR]	93.35	0.067	1	2	2	6	433	48.5	4.89
G3IHN6	4F2 cell-surface antigen heavy chain OS=Cricetulus griseus GN=I79_023340 PE=4 SV=1 - [G3IHN6_CRIGR]	149.16	0.084	1	3	3	6	524	57.8	5.33
G3I018	26S proteasome non-ATPase regulatory subunit 7 OS=Cricetulus griseus GN=I79_016691 PE=4 SV=1 - [G3I018_CRIGR]	92.34	0.1688	2	3	3	6	320	36.5	6.77
G3HV49	UPF0160 protein MYG1, mitochondrial OS=Cricetulus griseus GN=I79_014826 PE=4 SV=1 - [G3HV49_CRIGR]	83.01	0.0892	1	3	3	6	381	42.9	6.64
G3IPK9	Adenylate kinase 2, mitochondrial OS=Cricetulus griseus GN=I79_025923 PE=4 SV=1 - [G3IPK9_CRIGR]	65.23	0.5584	1	2	2	6	77	8.7	7.28
G3HNP6	26S protease regulatory subunit 6B (Fragment) OS=Cricetulus griseus GN=I79_012389 PE=3 SV=1 - [G3HNP6_CRIGR]	23.33	0.022	2	1	1	6	409	46.4	5.36
G3ICH7	Ephrin-B1 OS=Cricetulus griseus GN=I79_021375 PE=3 SV=1 - [G3ICH7_CRIGR]	26.42	0.1574	1	3	3	6	343	37.2	8.24
G3I303	DNA-directed RNA polymerases I, II, and III subunit RPABC3 OS=Cricetulus griseus GN=I79_017801 PE=4 SV=1 - [G3I303_CRIGR]	129.72	0.1533	1	2	2	5	150	17.1	4.68
Q3SZR8	Serine/arginine-rich splicing factor 3 OS=Bos taurus GN=SRSF3 PE=2 SV=1 - [SRSF3_BOVIN]	74.27	0.0549	1	1	1	5	164	19.3	11.65
Q3T003	60S ribosomal protein L18a OS=Bos taurus GN=RPL18A PE=2 SV=1 - [RL18A_BOVIN]	139.25	0.1307	2	2	2	5	176	20.7	10.71
Q17QC5	AP-2 complex subunit sigma OS=Bos taurus GN=AP2S1 PE=2 SV=1 - [AP2S1_BOVIN]	35.28	0.1056	2	2	2	5	142	17	6.18
G3HGH4	Small nuclear ribonucleoprotein Sm D1 OS=Cricetulus griseus GN=I79_009701 PE=4 SV=1 - [G3HGH4_CRIGR]	44.23	0.2605	1	2	2	5	119	13.3	11.56
Q3T0C7	Stathmin OS=Bos taurus GN=STMN1 PE=2 SV=3 - [STMN1_BOVIN]	54.53	0.0604	2	1	1	5	149	17.3	5.97
G3GX44	Protein SEC13-like OS=Cricetulus griseus GN=I79_002356 PE=4 SV=1 - [G3GX44_CRIGR]	26.12	0.0683	2	2	2	5	322	35.5	5.38
G3GRI8	cAMP-regulated phosphoprotein 19 OS=Cricetulus griseus GN=I79_000135 PE=4 SV=1 - [G3GRI8_CRIGR]	92.47	0.1146	7	1	1	5	96	10.6	9.7
Q2TBU0	Haptoglobin OS=Bos taurus GN=HP PE=2 SV=1 - [HPT_BOVIN]	22.91	0.0299	1	1	1	5	401	44.8	7.71
P52556	Flavin reductase (NADPH) OS=Bos taurus GN=BLVRB PE=1 SV=2 - [BLVRB_BOVIN]	88.67	0.0485	1	1	1	5	206	22.1	7.11
P81134	Renin receptor OS=Bos taurus GN=ATP6AP2 PE=1 SV=2 - [RENR_BOVIN]	28.47	0.0228	1	1	1	5	351	39.5	5.55
Q3T171	60S ribosomal protein L36 OS=Bos taurus GN=RPL36 PE=3 SV=3 - [RL36_BOVIN]	55.62	0.0952	1	1	1	5	105	12.2	11.59
Q08DP0	Phosphoglucomutase-1 OS=Bos taurus GN=PGM1 PE=2 SV=1 - [PGM1_BOVIN]	69.72	0.0587	1	1	3	5	562	61.6	6.81
A5PJM5	Mini-chromosome maintenance complex-binding protein OS=Bos taurus GN=MCMBP PE=2 SV=1 - [MCMBP_BOVIN]	85.42	0.0171	1	1	1	5	642	73	5.96
G3H2V3	Acidic leucine-rich nuclear phosphoprotein 32 family member E OS=Cricetulus griseus GN=I79_004556 PE=4 SV=1 - [G3H2V3_CRIGR]	140.81	0.0651	1	2	2	5	215	24.1	3.89
G3I3A8	Nuclear mitotic apparatus protein 1 OS=Cricetulus griseus GN=I79_017912 PE=4 SV=1 - [G3I3A8_CRIGR]	187.51	0.0096	1	2	2	5	3026	340	5.83
G3IFA9	Transcription elongation factor B polypeptide 2 OS=Cricetulus griseus GN=I79_022430 PE=4 SV=1 - [G3IFA9_CRIGR]	163.33	0.0936	1	1	1	5	267	30.3	9.58
G3H3E4	Galectin-3-binding protein OS=Cricetulus griseus GN=I79_004759 PE=4 SV=1 - [G3H3E4_CRIGR]	94.19	0.0279	1	2	2	5	574	63.8	5.19
G3GTC9	Phosphoacetylglucosamine mutase OS=Cricetulus griseus GN=I79_000908 PE=3 SV=1 - [G3GTC9_CRIGR]	129.19	0.0387	1	2	2	5	542	59.4	5.99
G3HXN7	Beta-hexosaminidase OS=Cricetulus griseus GN=I79_015800 PE=3 SV=1 - [G3HXN7_CRIGR]	46.16	0.0323	1	1	2	5	527	60.1	7.36
G3HXV5	Nucleolar phosphoprotein p130 OS=Cricetulus griseus GN=I79_015870 PE=4 SV=1 - [G3HXV5_CRIGR]	109.36	0.0372	1	2	2	5	699	73.4	9.45
G3HKU9	Cadherin-3 OS=Cricetulus griseus GN=I79_011331 PE=3 SV=1 - [G3HKU9_CRIGR]	106.53	0.024	1	1	2	5	792	87.2	4.7
G3I2V6	Plexin-B2 OS=Cricetulus griseus GN=I79_017750 PE=4 SV=1 - [G3I2V6_CRIGR]	91.87	0.0165	1	3	3	5	1753	195	5.68
G3IAZ4	Cysteine-rich protein 1 OS=Cricetulus griseus GN=I79_020780 PE=4 SV=1 - [G3IAZ4_CRIGR]	42.34	0.1429	2	2	2	5	70	7.8	8.38
G3GRE0	3'(2'),5'-bisphosphate nucleotidase 1 OS=Cricetulus griseus GN=I79_000085 PE=4 SV=1 - [G3GRE0_CRIGR]	28.05	0.1104	1	3	3	5	308	33.2	6.09
G3ICB6	Elongation factor 1-alpha 1 OS=Cricetulus griseus GN=I79_021309 PE=4 SV=1 - [G3ICB6_CRIGR]	88.36	0.4151	1	1	2	5	53	5.6	9.91
G3HJU9	40S ribosomal protein S29 OS=Cricetulus griseus GN=I79_010951 PE=4 SV=1 - [G3HJU9_CRIGR]	97.81	0.1429	4	1	1	5	56	6.8	10.1
Q3T0V3	Eukaryotic translation initiation factor 3 subunit K OS=Bos taurus GN=EIF3K PE=2 SV=1 - [EIF3K_BOVIN]	87	0.0321	1	1	1	5	218	25.1	4.93
G3I3I0	AP-2 complex subunit alpha-2 OS=Cricetulus griseus GN=I79_017988 PE=4 SV=1 - [G3I3I0_CRIGR]	86.82	0.0288	2	1	3	5	938	103.9	6.93
G3I6F9	EH domain-containing protein 1 OS=Cricetulus griseus GN=I79_019087 PE=4 SV=1 - [G3I6F9_CRIGR]	172.43	0.0578	2	2	2	5	398	45	6.57
G3H3I2	Importin-9 OS=Cricetulus griseus GN=I79_004830 PE=4 SV=1 - [G3H3I2_CRIGR]	56.29	0.0255	1	2	2	5	1178	130.6	4.87
G3HUV6	Cysteine-rich motor neuron 1 protein OS=Cricetulus griseus GN=I79_014724 PE=4 SV=1 - [G3HUV6_CRIGR]	115.4	0.0988	1	3	3	5	344	37.6	4.91
G3H8N3	60S ribosomal protein L4 OS=Cricetulus griseus GN=I79_006739 PE=4 SV=1 - [G3H8N3_CRIGR]	82.41	0.1119	2	1	2	5	286	32.2	10.4
G3I6K0	Putative ATP-dependent RNA helicase DDX23 OS=Cricetulus griseus GN=I79_019124 PE=3 SV=1 - [G3I6K0_CRIGR]	42.55	0.0147	1	1	1	5	819	95.4	9.57
G3HU05	Intelectin-1a OS=Cricetulus griseus GN=I79_014372 PE=4 SV=1 - [G3HU05_CRIGR]	166.13	0.0176	1	1	1	5	626	68.5	6.15
Q3T114	Ribonuclease UK114 OS=Bos taurus GN=HRSP12 PE=2 SV=3 - [UK114_BOVIN]	113.17	0.1606	1	2	2	5	137	14.3	6.65
G3HNJ6	60S ribosomal protein L5 OS=Cricetulus griseus GN=I79_012334 PE=3 SV=1 - [G3HNJ6_CRIGR]	96.85	0.1212	7	3	3	5	297	34.4	9.74
G3I1P5	SH3 domain-binding glutamic acid-rich-like protein OS=Cricetulus griseus GN=I79_017308 PE=3 SV=1 - [G3I1P5_CRIGR]	277.31	0.307	2	3	3	5	114	12.7	5.07
G3IEB1	Annexin OS=Cricetulus griseus GN=I79_022056 PE=3 SV=1 - [G3IEB1_CRIGR]	73.38	0.0313	1	1	1	5	319	35.9	5.64
G3HYY3	Urokinase plasminogen activator surface receptor OS=Cricetulus griseus GN=I79_016276 PE=4 SV=1 - [G3HYY3_CRIGR]	137.42	0.0538	1	1	1	5	186	20.3	5.12
G3IMK5	Claudin OS=Cricetulus griseus GN=I79_025145 PE=3 SV=1 - [G3IMK5_CRIGR]	138.74	0.1333	4	1	2	5	210	22.1	8.24
G3HBB1	Heterogeneous nuclear ribonucleoprotein F OS=Cricetulus griseus GN=I79_007736 PE=4 SV=1 - [G3HBB1_CRIGR]	105.67	0.194	2	1	1	5	67	7.6	6.51
G3I3C2	Protein TSSC1 OS=Cricetulus griseus GN=I79_017926 PE=4 SV=1 - [G3I3C2_CRIGR]	42.06	0.0337	1	1	1	5	386	43.1	5.15
A6QLN9	von Willebrand factor A domain-containing protein 1 OS=Bos taurus PE=2 SV=1 - [VWA1_BOVIN]	296.6	0.0339	1	1	1	5	413	43.7	8.68
Q3ZBN0	Costars family protein ABRACL OS=Bos taurus GN=ABRACL PE=3 SV=1 - [ABRAL_BOVIN]	206.67	0.1605	2	1	1	5	81	9	6.29
G3HAN1	Charged multivesicular body protein 4b OS=Cricetulus griseus GN=I79_007487 PE=4 SV=1 - [G3HAN1_CRIGR]	217.61	0.0737	1	1	1	5	190	21.4	4.72
G3HVG9	Matrin-3 OS=Cricetulus griseus GN=I79_014957 PE=4 SV=1 - [G3HVG9_CRIGR]	113.92	0.0153	1	1	1	5	847	94.6	6.25
G3HP56	Glucosamine--fructose-6-phosphate aminotransferase [isomerizing] 2 OS=Cricetulus griseus GN=I79_012560 PE=4 SV=1 - [G3HP56_CRIGR]	156.7	0.1355	2	2	2	5	273	30.3	8.37
G3HF38	Basigin OS=Cricetulus griseus GN=I79_009191 PE=4 SV=1 - [G3HF38_CRIGR]	123.5	0.0755	1	2	2	5	437	47.9	7.68
G3HSA7	Thioredoxin domain-containing protein 17 OS=Cricetulus griseus GN=I79_013736 PE=4 SV=1 - [G3HSA7_CRIGR]	114.7	0.1364	1	2	2	5	176	19.6	5.85
G3HZX7	Apoptosis regulator BAX OS=Cricetulus griseus GN=I79_016641 PE=4 SV=1 - [G3HZX7_CRIGR]	55.03	0.0518	2	2	2	5	521	58.4	6.35
G3GVW2	Putative hydrolase RBBP9 OS=Cricetulus griseus GN=I79_001864 PE=4 SV=1 - [G3GVW2_CRIGR]	27.44	0.086	1	1	1	5	186	21	6.28
Q0III3	Cytoplasmic dynein 1 intermediate chain 2 OS=Bos taurus GN=DYNC1I2 PE=1 SV=1 - [DC1I2_BOVIN]	199.77	0.0343	1	1	1	5	612	68.3	5.33
Q56JZ5	Eukaryotic translation initiation factor 3 subunit H OS=Bos taurus GN=EIF3H PE=2 SV=1 - [EIF3H_BOVIN]	22.07	0.0909	1	1	2	5	352	39.9	6.67
G3HSP7	Ester hydrolase C11orf54-like OS=Cricetulus griseus GN=I79_013881 PE=4 SV=1 - [G3HSP7_CRIGR]	87.57	0.1296	1	2	2	5	247	27.6	7.08
G3HN76	Polyadenylate-binding protein 4 OS=Cricetulus griseus GN=I79_012210 PE=4 SV=1 - [G3HN76_CRIGR]	129.95	0.4396	2	1	2	5	91	9.7	6.52
G3H381	Kinesin light chain 1 OS=Cricetulus griseus GN=I79_004696 PE=4 SV=1 - [G3H381_CRIGR]	57.14	0.0164	2	1	1	5	609	68.7	5.95
G3HEL2	Glucosamine-6-phosphate isomerase 1 (Fragment) OS=Cricetulus griseus GN=I79_008999 PE=4 SV=1 - [G3HEL2_CRIGR]	174.13	0.0486	2	1	1	5	247	27.7	6.52
G3HGV7	tRNA-splicing ligase RtcB homolog OS=Cricetulus griseus GN=Rtcb PE=3 SV=1 - [G3HGV7_CRIGR]	47.29	0.0841	2	3	3	5	440	47.8	7.08
G3HH11	N-acylneuraminate cytidylyltransferase OS=Cricetulus griseus GN=I79_009906 PE=4 SV=1 - [G3HH11_CRIGR]	60.64	0.0436	1	1	1	5	275	31.3	6.96
G3HAV4	Vacuolar protein sorting-associated protein VTA1-like OS=Cricetulus griseus GN=I79_007563 PE=4 SV=1 - [G3HAV4_CRIGR]	25.99	0.1111	2	3	3	5	306	33.8	6.13
G3HJB6	Ras and Rab interactor-like protein OS=Cricetulus griseus GN=I79_010758 PE=4 SV=1 - [G3HJB6_CRIGR]	44.29	0.1029	1	4	4	5	651	71.7	5.12
G3HVB6	Clustered mitochondria protein homolog OS=Cricetulus griseus GN=I79_014897 PE=3 SV=1 - [G3HVB6_CRIGR]	95.11	0.0181	1	2	2	5	1324	148.4	6.09
G3HEY8	Nucleotide exchange factor SIL1 OS=Cricetulus griseus GN=I79_009136 PE=4 SV=1 - [G3HEY8_CRIGR]	167.08	0.0799	1	1	3	5	388	44	4.89
G3HBG5	26S protease regulatory subunit 4 OS=Cricetulus griseus GN=I79_007793 PE=4 SV=1 - [G3HBG5_CRIGR]	57.89	0.044	1	2	2	5	477	53.3	5.82
G3IBX8	N-acetyl-D-glucosamine kinase OS=Cricetulus griseus GN=I79_021162 PE=4 SV=1 - [G3IBX8_CRIGR]	31.65	0.0301	2	1	1	5	299	32.3	6.23
G3GVW1	Protein transport protein Sec23B OS=Cricetulus griseus GN=I79_001865 PE=4 SV=1 - [G3GVW1_CRIGR]	89.79	0.0349	1	1	2	5	630	70.9	7.01
G3I638	Eukaryotic translation initiation factor 3 subunit F OS=Cricetulus griseus GN=Eif3f PE=3 SV=1 - [G3I638_CRIGR]	99.65	0.1192	1	2	2	5	260	28.9	5.17
G3GVP7	ADP-sugar pyrophosphatase OS=Cricetulus griseus GN=I79_001795 PE=3 SV=1 - [G3GVP7_CRIGR]	23.57	0.1667	1	3	3	5	216	24.2	5.34
G3IC08	Vacuolar protein sorting-associated protein 37B OS=Cricetulus griseus GN=I79_021196 PE=4 SV=1 - [G3IC08_CRIGR]	99.64	0.0669	1	1	1	5	239	26.1	9.28
Q32PB9	60S ribosomal protein L38 OS=Bos taurus GN=RPL38 PE=3 SV=4 - [RL38_BOVIN]	86.8	0.3571	1	2	2	4	70	8.2	10.1
G3H9C9	Transcription elongation factor B polypeptide 1 OS=Cricetulus griseus GN=I79_006997 PE=4 SV=1 - [G3H9C9_CRIGR]	93.76	0.2857	1	2	2	4	112	12.5	4.78
Q5E9D1	Small ubiquitin-related modifier 1 OS=Bos taurus GN=SUMO1 PE=3 SV=1 - [SUMO1_BOVIN]	100.55	0.2277	2	2	2	4	101	11.5	5.52
Q3T0F7	Myotrophin OS=Bos taurus GN=MTPN PE=1 SV=3 - [MTPN_BOVIN]	30.48	0.4153	1	2	2	4	118	12.9	5.52
P05785	Keratin, type I cytoskeletal 14 (Fragment) OS=Bos taurus GN=KRT14 PE=3 SV=1 - [K1C14_BOVIN]	75.14	0.3011	1	1	2	4	93	10.7	6.3
Q56JW4	Adenine phosphoribosyltransferase OS=Bos taurus GN=APRT PE=2 SV=1 - [APT_BOVIN]	131.5	0.0556	1	1	1	4	180	19.5	7.72
Q03763	Desmoglein-1 OS=Bos taurus GN=DSG1 PE=1 SV=1 - [DSG1_BOVIN]	103.85	0.0134	1	1	1	4	1043	112.2	5.08
G3IIH3	Eukaryotic translation initiation factor 4E OS=Cricetulus griseus GN=I79_023644 PE=3 SV=1 - [G3IIH3_CRIGR]	119.19	0.2137	3	2	2	4	117	13.4	8.29
P13909	Plasminogen activator inhibitor 1 OS=Bos taurus GN=SERPINE1 PE=1 SV=1 - [PAI1_BOVIN]	101.48	0.0373	1	1	2	4	402	45.3	6.38
Q3T0T5	Hematological and neurological expressed 1 protein OS=Bos taurus GN=HN1 PE=2 SV=3 - [HN1_BOVIN]	79.85	0.1169	2	1	1	4	154	16	5.6
Q2KIX7	Protein HP-25 homolog 1 OS=Bos taurus PE=1 SV=1 - [HP251_BOVIN]	57.55	0.1509	1	2	2	4	212	22.5	7.46
Q3T0U2	60S ribosomal protein L14 OS=Bos taurus GN=RPL14 PE=2 SV=3 - [RL14_BOVIN]	189.68	0.1121	1	2	2	4	214	23.4	10.78
Q8MJG1	PC4 and SFRS1-interacting protein OS=Bos taurus GN=PSIP1 PE=2 SV=2 - [PSIP1_BOVIN]	60.32	0.0151	1	1	1	4	530	60.1	9.13
Q3ZC42	Alcohol dehydrogenase class-3 OS=Bos taurus GN=ADH5 PE=2 SV=1 - [ADHX_BOVIN]	26.98	0.0428	1	2	2	4	374	39.7	7.5
P08814	Parathymosin OS=Bos taurus GN=PTMS PE=1 SV=2 - [PTMS_BOVIN]	137.14	0.1078	1	1	1	4	102	11.5	4.12
Q3MHN0	Proteasome subunit beta type-6 OS=Bos taurus GN=PSMB6 PE=1 SV=1 - [PSB6_BOVIN]	54.44	0.205	1	2	2	4	239	25.5	5.02
Q3SZ18	Hypoxanthine-guanine phosphoribosyltransferase OS=Bos taurus GN=HPRT1 PE=2 SV=3 - [HPRT_BOVIN]	91.97	0.1193	1	2	2	4	218	24.5	7.81
A1A4P5	Prefoldin subunit 2 OS=Bos taurus GN=PFDN2 PE=2 SV=1 - [PFD2_BOVIN]	76.95	0.1494	1	1	2	4	154	16.6	6.58
A2VE52	Oligoribonuclease, mitochondrial OS=Bos taurus GN=REXO2 PE=2 SV=1 - [ORN_BOVIN]	57.18	0.0422	2	1	1	4	237	26.9	7.46
G3HMV7	Tissue alpha-L-fucosidase OS=Cricetulus griseus GN=I79_012074 PE=4 SV=1 - [G3HMV7_CRIGR]	196.17	0.0238	1	1	1	4	462	53.3	6.48
G3H284	Endoplasmic reticulum resident protein 29 OS=Cricetulus griseus GN=I79_004255 PE=3 SV=1 - [G3H284_CRIGR]	136.63	0.0808	2	2	2	4	260	28.6	6.62
G3GV30	Echinoderm microtubule-associated protein-like 4 (Fragment) OS=Cricetulus griseus GN=I79_001560 PE=4 SV=1 - [G3GV30_CRIGR]	65.28	0.0214	1	2	2	4	983	109.3	6.6
G3GVX1	Ribosome-binding protein 1 OS=Cricetulus griseus GN=I79_001876 PE=4 SV=1 - [G3GVX1_CRIGR]	66.6	0.0154	1	2	2	4	2009	216.6	8.57
G3GVA8	Aminoacyl tRNA synthetase complex-interacting multifunctional protein 2 OS=Cricetulus griseus GN=I79_001643 PE=4 SV=1 - [G3GVA8_CRIGR]	35.04	0.0781	2	2	2	4	320	35.4	7.81
G3HNV7	Glyceraldehyde-3-phosphate dehydrogenase OS=Cricetulus griseus GN=I79_012452 PE=3 SV=1 - [G3HNV7_CRIGR]	120.89	0.051	1	1	1	4	294	31.8	7.15
G3HTV3	Tripartite motif-containing protein 47 OS=Cricetulus griseus GN=I79_014333 PE=4 SV=1 - [G3HTV3_CRIGR]	110.23	0.0833	1	2	2	4	336	37.2	4.94
G3H9A3	60S ribosomal protein L7a OS=Cricetulus griseus GN=I79_006969 PE=4 SV=1 - [G3H9A3_CRIGR]	43.88	0.1345	6	1	3	4	238	25.9	10.18
G3GXB5	Ethanolamine-phosphate cytidylyltransferase OS=Cricetulus griseus GN=I79_002405 PE=4 SV=1 - [G3GXB5_CRIGR]	37.88	0.1158	2	3	3	4	354	40.1	6.71
G3HT32	Cullin-2 OS=Cricetulus griseus GN=I79_014042 PE=3 SV=1 - [G3HT32_CRIGR]	87.36	0.0134	1	1	1	4	745	86.9	6.93
G3IHR6	Macrophage colony-stimulating factor 1 OS=Cricetulus griseus GN=I79_023371 PE=4 SV=1 - [G3IHR6_CRIGR]	32.36	0.0344	1	2	2	4	552	60.7	5.5
G3H7Q0	Shootin-1 OS=Cricetulus griseus GN=I79_006386 PE=4 SV=1 - [G3H7Q0_CRIGR]	64.78	0.0732	1	2	2	4	287	33.5	4.96
G3H3R6	Kinesin-like protein KIF23 OS=Cricetulus griseus GN=I79_004896 PE=3 SV=1 - [G3H3R6_CRIGR]	121.51	0.0124	1	1	1	4	967	110.3	8.5
G3GU75	Translational activator GCN1 OS=Cricetulus griseus GN=I79_001227 PE=4 SV=1 - [G3GU75_CRIGR]	88.42	0.0131	1	3	3	4	2738	300.6	7.23
G3HCL8	Cdc42-interacting protein 4 OS=Cricetulus griseus GN=I79_008229 PE=4 SV=1 - [G3HCL8_CRIGR]	39.28	0.0787	1	3	3	4	610	69.1	5.81
G3HGE2	Protein TANC2 (Fragment) OS=Cricetulus griseus GN=I79_009666 PE=4 SV=1 - [G3HGE2_CRIGR]	80.04	0.0041	1	1	1	4	1971	217.5	7.62
G3GTT2	C-C motif chemokine 2 OS=Cricetulus griseus GN=I79_001071 PE=4 SV=1 - [G3GTT2_CRIGR]	61.97	0.0559	1	1	1	4	143	15.8	9.16
G3H8Q6	Importin subunit alpha OS=Cricetulus griseus GN=I79_006766 PE=3 SV=1 - [G3H8Q6_CRIGR]	76.55	0.0181	1	1	1	4	497	55	4.83
G3H3C9	GTPase KRas OS=Cricetulus griseus GN=I79_004744 PE=4 SV=1 - [G3H3C9_CRIGR]	101.33	0.071	2	1	1	4	155	17.4	5.22
Q58CU2	Band 4.1-like protein 5 OS=Bos taurus GN=EPB41L5 PE=2 SV=1 - [E41L5_BOVIN]	65.64	0.0438	2	2	2	4	502	57.1	9.35
G3I136	Leukemia inhibitory factor OS=Cricetulus griseus GN=I79_017082 PE=4 SV=1 - [G3I136_CRIGR]	81.65	0.1203	2	2	2	4	158	17.4	8.88
G3HI29	Ceroid-lipofuscinosis neuronal protein 5 OS=Cricetulus griseus GN=I79_010294 PE=4 SV=1 - [G3HI29_CRIGR]	61.89	0.033	1	1	1	4	273	32	6.09
G3IJ29	Eukaryotic translation initiation factor 3 subunit D OS=Cricetulus griseus GN=Eif3d PE=3 SV=1 - [G3IJ29_CRIGR]	102.96	0.0791	2	3	3	4	493	56.9	5.22
G3HRL6	CD63 antigen OS=Cricetulus griseus GN=I79_013522 PE=4 SV=1 - [G3HRL6_CRIGR]	114.21	0.0431	1	1	1	4	232	25.5	7.61
Q8HXY9-2	Isoform 2 of Craniofacial development protein 1 OS=Bos taurus GN=CFDP1 - [CFDP1_BOVIN]	51.55	0.0465	3	1	1	4	215	23.8	4.54
G3H6Y3	Syntenin-2 OS=Cricetulus griseus GN=I79_006107 PE=4 SV=1 - [G3H6Y3_CRIGR]	107.31	0.1122	1	1	1	4	98	10.7	9.35
G3IMG4	DCN1-like protein OS=Cricetulus griseus GN=I79_025103 PE=4 SV=1 - [G3IMG4_CRIGR]	31.13	0.0343	1	1	1	4	204	23.6	5
G3HJ13	LIM and senescent cell antigen-like-containing domain protein 1 OS=Cricetulus griseus GN=I79_010647 PE=4 SV=1 - [G3HJ13_CRIGR]	175.18	0.0369	1	1	1	4	325	37.2	8.05
G3IEB7	Out at first protein-like OS=Cricetulus griseus GN=I79_022062 PE=4 SV=1 - [G3IEB7_CRIGR]	223.49	0.0789	1	1	1	4	152	17.7	8.06
G3I2K8	Ribonucleoside-diphosphate reductase subunit M2 OS=Cricetulus griseus GN=I79_017646 PE=4 SV=1 - [G3I2K8_CRIGR]	140.23	0.0282	1	1	1	4	390	45	5.45
G3GS69	FERM, RhoGEF and pleckstrin domain-containing protein 1 OS=Cricetulus griseus GN=I79_000382 PE=4 SV=1 - [G3GS69_CRIGR]	64.73	0.0114	1	1	1	4	1049	118.7	7.87
G3HC56	Ephrin-A1 OS=Cricetulus griseus GN=I79_008006 PE=3 SV=1 - [G3HC56_CRIGR]	70.4	0.1707	1	2	2	4	205	23.6	6.89
G3I000	Aldehyde dehydrogenase family 16 member A1 OS=Cricetulus griseus GN=I79_016665 PE=4 SV=1 - [G3I000_CRIGR]	193.42	0.0175	1	1	1	4	802	85.2	6.86
G3H2A5	Vacuolar protein sorting-associated protein 29 OS=Cricetulus griseus GN=I79_004275 PE=4 SV=1 - [G3H2A5_CRIGR]	71.23	0.1257	2	2	2	4	183	20.6	7.01
G3IA31	Placenta-specific gene 8 protein OS=Cricetulus griseus GN=I79_020447 PE=4 SV=1 - [G3IA31_CRIGR]	101.48	0.1339	1	1	1	4	112	12.3	7.58
G3HG54	Kin of IRRE-like protein 1 OS=Cricetulus griseus GN=I79_009573 PE=4 SV=1 - [G3HG54_CRIGR]	148.82	0.0368	1	2	2	4	789	87	5.97
G3HJV0	Protein canopy-like 2 OS=Cricetulus griseus GN=I79_010952 PE=4 SV=1 - [G3HJV0_CRIGR]	116.36	0.3196	2	2	2	4	97	11	4.82
G3HV92	H/ACA ribonucleoprotein complex subunit 4 OS=Cricetulus griseus GN=I79_014871 PE=4 SV=1 - [G3HV92_CRIGR]	281.49	0.0351	1	1	1	4	513	57.8	9.41
G3IKH4	Collagen alpha-2(V) chain OS=Cricetulus griseus GN=I79_024377 PE=4 SV=1 - [G3IKH4_CRIGR]	57.26	0.0299	1	2	2	4	935	87.1	6.2
G3I062	Putative uncharacterized protein OS=Cricetulus griseus GN=I79_016739 PE=4 SV=1 - [G3I062_CRIGR]	136.65	0.0678	1	1	1	4	236	26.8	10.92
G3I1R6	Epididymal secretory protein E3-beta OS=Cricetulus griseus GN=I79_017334 PE=3 SV=1 - [G3I1R6_CRIGR]	76.22	0.0409	1	1	1	4	342	38.9	8.63
G3H750	Calpastatin OS=Cricetulus griseus GN=I79_006176 PE=4 SV=1 - [G3H750_CRIGR]	82.02	0.0219	1	1	1	4	776	83.9	5.39
Q3T186	Ribose-5-phosphate isomerase (Fragment) OS=Bos taurus GN=RPIA PE=2 SV=2 - [RPIA_BOVIN]	26.05	0.1402	1	2	2	4	264	28.7	7.46
G3I151	Transcobalamin-2 OS=Cricetulus griseus GN=I79_017097 PE=4 SV=1 - [G3I151_CRIGR]	44.52	0.0844	1	2	2	4	391	43.5	6.98
G3IC54	60S ribosomal protein L10 OS=Cricetulus griseus GN=I79_021242 PE=4 SV=1 - [G3IC54_CRIGR]	290.26	0.1104	1	1	1	4	163	18.6	9.95
G3H7M3	Adenylosuccinate synthetase OS=Cricetulus griseus GN=I79_006358 PE=3 SV=1 - [G3H7M3_CRIGR]	167.02	0.0704	1	2	2	4	355	39.5	6.87
Q5E9X4	Leucine-rich repeat-containing protein 59 OS=Bos taurus GN=LRRC59 PE=2 SV=1 - [LRC59_BOVIN]	45.33	0.0817	2	2	2	4	306	34.9	9.52
G3HYW2	Malignant T cell amplified sequence 1 OS=Cricetulus griseus GN=I79_016254 PE=4 SV=1 - [G3HYW2_CRIGR]	153.93	0.1377	2	1	1	4	138	15.5	8.82
G3GY31	Cleavage and polyadenylation specificity factor subunit 6 OS=Cricetulus griseus GN=I79_002686 PE=4 SV=1 - [G3GY31_CRIGR]	51.34	0.082	2	2	2	4	500	53.6	9.74
G3IH96	Eukaryotic translation initiation factor 4B OS=Cricetulus griseus GN=I79_023184 PE=4 SV=1 - [G3IH96_CRIGR]	59.81	0.026	1	2	2	4	616	69.5	5.81
G3H9S0	Protein Niban OS=Cricetulus griseus GN=I79_007150 PE=4 SV=1 - [G3H9S0_CRIGR]	114.17	0.0226	1	2	2	4	930	102.9	4.73
Q3ZBV1	IST1 homolog OS=Bos taurus GN=IST1 PE=2 SV=1 - [IST1_BOVIN]	19.1	0.044	1	2	2	4	364	39.8	5.35
G3H6E0	DNA (Cytosine-5)-methyltransferase 1 OS=Cricetulus griseus GN=I79_005895 PE=3 SV=1 - [G3H6E0_CRIGR]	28.29	0.0941	1	1	1	4	85	9.5	9.5
G3I196	60S ribosomal protein L14 OS=Cricetulus griseus GN=I79_017147 PE=4 SV=1 - [G3I196_CRIGR]	304.2	0.0854	1	1	1	4	164	17.7	11.06
G3HZG6	Large proline-rich protein BAT3 OS=Cricetulus griseus GN=I79_016467 PE=4 SV=1 - [G3HZG6_CRIGR]	56.13	0.0241	1	2	2	4	953	101.9	6.42
G3H0B9	WD repeat-containing protein 61 OS=Cricetulus griseus GN=I79_003574 PE=4 SV=1 - [G3H0B9_CRIGR]	33.14	0.0361	2	1	1	4	305	33.6	5.57
G3GWX0	Exocyst complex component 2 OS=Cricetulus griseus GN=I79_002255 PE=4 SV=1 - [G3GWX0_CRIGR]	35.91	0.0281	1	2	2	4	924	103.8	7.17
G3GUQ5	Tyrosine-protein phosphatase non-receptor type 6 (Fragment) OS=Cricetulus griseus GN=I79_001423 PE=4 SV=1 - [G3GUQ5_CRIGR]	17.68	0.0203	1	1	1	4	592	67.3	7.78
G3HDA0	Eukaryotic translation elongation factor 1 epsilon-1 OS=Cricetulus griseus GN=I79_008479 PE=4 SV=1 - [G3HDA0_CRIGR]	104.71	0.102	1	1	1	4	98	10.6	8.47
G3HX69	LIM domain and actin-binding protein 1 OS=Cricetulus griseus GN=I79_015588 PE=4 SV=1 - [G3HX69_CRIGR]	52.41	0.0158	1	1	1	4	759	84.5	7.42
G3HBW5	SUMO-conjugating enzyme UBC9 (Fragment) OS=Cricetulus griseus GN=I79_007916 PE=3 SV=1 - [G3HBW5_CRIGR]	23.59	0.0765	1	1	1	4	170	19.1	6.25
G3HWS3	Ras-related protein Rab-2B OS=Cricetulus griseus GN=I79_015421 PE=3 SV=1 - [G3HWS3_CRIGR]	153.73	0.0602	1	1	1	4	216	24.2	7.01
G3HXL9	AP2-associated protein kinase 1 OS=Cricetulus griseus GN=I79_015746 PE=4 SV=1 - [G3HXL9_CRIGR]	38.67	0.0124	1	1	1	4	1206	129.1	6.02
G3I784	Enolase-phosphatase E1 OS=Cricetulus griseus GN=I79_019369 PE=3 SV=1 - [G3I784_CRIGR]	27.08	0.1154	1	2	2	4	260	28.8	4.87
G3H873	ELKS/RAB6-interacting/CAST family member 1 OS=Cricetulus griseus GN=I79_006571 PE=4 SV=1 - [G3H873_CRIGR]	27.2	0.0108	1	1	1	4	1116	127.9	5.87
G3HRF0	Polyadenylate-binding protein 2 OS=Cricetulus griseus GN=I79_013417 PE=4 SV=1 - [G3HRF0_CRIGR]	74.96	0.0861	2	2	2	4	244	28.1	9.57
Q0IIJ0	N-alpha-acetyltransferase 50 OS=Bos taurus GN=NAA50 PE=2 SV=1 - [NAA50_BOVIN]	29.45	0.071	2	1	1	3	169	19.4	8.81
G3H2C9	S-phase kinase-associated protein 1 OS=Cricetulus griseus GN=I79_004338 PE=4 SV=1 - [G3H2C9_CRIGR]	38.41	0.0491	1	1	1	3	163	18.6	4.54
Q0VCF9	Protein LSM12 homolog OS=Bos taurus GN=LSM12 PE=2 SV=2 - [LSM12_BOVIN]	79.41	0.0667	1	1	1	3	195	21.7	7.74
G3HKD0	Peptidyl-prolyl cis-trans isomerase OS=Cricetulus griseus GN=I79_011150 PE=3 SV=1 - [G3HKD0_CRIGR]	29.56	0.1627	2	2	2	3	166	18.2	7.99
G3H2U6	Splicing factor 3B subunit 4 OS=Cricetulus griseus GN=I79_004549 PE=4 SV=1 - [G3H2U6_CRIGR]	168.26	0.033	1	1	1	3	424	44.3	8.56
P15467	Ribonuclease 4 OS=Bos taurus GN=RNASE4 PE=1 SV=4 - [RNAS4_BOVIN]	99.07	0.0924	1	1	1	3	119	13.7	8.51
Q0VCA3	LETM1 and EF-hand domain-containing protein 1, mitochondrial OS=Bos taurus GN=LETM1 PE=2 SV=1 - [LETM1_BOVIN]	52.36	0.0082	2	1	1	3	732	81.8	6.73
G3I5S7	Coatomer subunit delta OS=Cricetulus griseus GN=I79_018833 PE=4 SV=1 - [G3I5S7_CRIGR]	35.23	0.0705	2	3	3	3	511	57.2	6.21
Q29RK4	UV excision repair protein RAD23 homolog B OS=Bos taurus GN=RAD23B PE=2 SV=1 - [RD23B_BOVIN]	62.9	0.0466	1	1	1	3	408	43.1	4.84
Q0VCM5	Inter-alpha-trypsin inhibitor heavy chain H1 OS=Bos taurus GN=ITIH1 PE=2 SV=1 - [ITIH1_BOVIN]	102.2	0.0397	1	2	2	3	906	101.2	7.4
P12082	Complement C5a anaphylatoxin OS=Bos taurus GN=C5 PE=1 SV=1 - [CO5_BOVIN]	91.82	0.1351	1	1	1	3	74	8.5	8.27
P81644	Apolipoprotein A-II OS=Bos taurus GN=APOA2 PE=1 SV=2 - [APOA2_BOVIN]	218.39	0.16	1	1	1	3	100	11.2	8.1
Q2T9L8	Methionine--tRNA ligase, cytoplasmic OS=Bos taurus GN=MARS PE=2 SV=1 - [SYMC_BOVIN]	30.29	0.0178	2	2	2	3	898	100.6	6.42
Q5BIN5	Peptidyl-prolyl cis-trans isomerase NIMA-interacting 1 OS=Bos taurus GN=PIN1 PE=2 SV=1 - [PIN1_BOVIN]	41.79	0.2147	2	2	2	3	163	18.3	8.82
P53620	Coatomer subunit gamma-1 OS=Bos taurus GN=COPG1 PE=1 SV=1 - [COPG1_BOVIN]	83.13	0.0332	1	1	2	3	874	97.3	5.45
Q5E936	Thioredoxin domain-containing protein 12 OS=Bos taurus GN=TXNDC12 PE=2 SV=1 - [TXD12_BOVIN]	34.26	0.0523	1	1	1	3	172	19.2	5.27
Q3MHF7	S-methyl-5'-thioadenosine phosphorylase OS=Bos taurus GN=MTAP PE=1 SV=1 - [MTAP_BOVIN]	163.93	0.0636	2	1	1	3	283	31.2	7.43
Q2TBW7	Sorting nexin-2 OS=Bos taurus GN=SNX2 PE=2 SV=1 - [SNX2_BOVIN]	99.14	0.0462	2	2	2	3	519	58.4	5.12
Q0VBZ9	MARCKS-related protein OS=Bos taurus GN=MARCKSL1 PE=2 SV=1 - [MRP_BOVIN]	137.52	0.0758	1	1	1	3	198	19.8	4.69
Q2TBP7	C-Myc-binding protein OS=Bos taurus GN=MYCBP PE=3 SV=3 - [MYCBP_BOVIN]	78.67	0.1068	1	1	1	3	103	12	5.91
Q05589	Urokinase-type plasminogen activator OS=Bos taurus GN=PLAU PE=2 SV=1 - [UROK_BOVIN]	23.01	0.0277	1	1	1	3	433	48.7	8.03
G3HRS6	SECIS-binding protein 2-like OS=Cricetulus griseus GN=I79_013548 PE=4 SV=1 - [G3HRS6_CRIGR]	48.12	0.0155	1	2	2	3	1291	144.1	5.67
G3GTV0	Schlafen family member 5 OS=Cricetulus griseus GN=I79_001089 PE=4 SV=1 - [G3GTV0_CRIGR]	45.08	0.0075	2	1	1	3	805	91.6	6.9
G3H8P6	Dual specificity mitogen-activated protein kinase kinase 5 OS=Cricetulus griseus GN=I79_006754 PE=3 SV=1 - [G3H8P6_CRIGR]	50.44	0.0097	1	1	1	3	719	78.4	5.05
G3HLD0	Lactoylglutathione lyase OS=Cricetulus griseus GN=I79_011518 PE=4 SV=1 - [G3HLD0_CRIGR]	36.61	0.0455	1	1	1	3	154	17.6	5.1
G3HAU7	NudC domain-containing protein 1 OS=Cricetulus griseus GN=I79_007556 PE=4 SV=1 - [G3HAU7_CRIGR]	32.7	0.0365	1	1	1	3	438	49.8	5.4
G3HUI7	Protein ERGIC-53 OS=Cricetulus griseus GN=I79_014598 PE=4 SV=1 - [G3HUI7_CRIGR]	118.89	0.0281	1	1	1	3	391	44.4	6.25
G3HPM5	Methyltransferase-like protein 11B OS=Cricetulus griseus GN=I79_012740 PE=4 SV=1 - [G3HPM5_CRIGR]	36.13	0.0212	1	1	1	3	283	32.3	6.24
G3H4X1	Ribulose-phosphate 3-epimerase OS=Cricetulus griseus GN=I79_005334 PE=3 SV=1 - [G3H4X1_CRIGR]	26.71	0.0307	1	1	1	3	228	24.9	5.41
G3GVI3	Serine hydroxymethyltransferase OS=Cricetulus griseus GN=I79_001722 PE=1 SV=1 - [G3GVI3_CRIGR]	101.59	0.0558	2	1	2	3	412	45.8	5.72
G3H4V0	Vigilin OS=Cricetulus griseus GN=I79_005313 PE=4 SV=1 - [G3H4V0_CRIGR]	138.18	0.0118	1	1	1	3	1268	141.6	6.87
G3HC29	Protein S100-A4 OS=Cricetulus griseus GN=I79_008072 PE=4 SV=1 - [G3HC29_CRIGR]	103.87	0.0891	1	1	1	3	101	11.8	5.31
G3HMP0	Protein TFG OS=Cricetulus griseus GN=I79_012009 PE=4 SV=1 - [G3HMP0_CRIGR]	46.88	0.1111	1	1	1	3	72	8.4	7.25
G3HJA4	26S proteasome non-ATPase regulatory subunit 8 OS=Cricetulus griseus GN=I79_010746 PE=4 SV=1 - [G3HJA4_CRIGR]	25.97	0.1311	2	2	2	3	183	21.3	5.94
G3IFQ5	Protein XRP2 OS=Cricetulus griseus GN=I79_022578 PE=4 SV=1 - [G3IFQ5_CRIGR]	33.48	0.0229	1	1	1	3	349	39.4	5.52
G3I0F7	Alpha-N-acetylgalactosaminidase OS=Cricetulus griseus GN=I79_016839 PE=4 SV=1 - [G3I0F7_CRIGR]	53.62	0.0193	1	1	1	3	415	47.2	7.84
G3HF50	Complement factor D (Fragment) OS=Cricetulus griseus GN=I79_009203 PE=3 SV=1 - [G3HF50_CRIGR]	40.09	0.0383	1	1	1	3	235	25.6	7.71
G3I3N5	V-type proton ATPase subunit C 1 OS=Cricetulus griseus GN=I79_018045 PE=4 SV=1 - [G3I3N5_CRIGR]	20.64	0.0497	2	2	2	3	382	43.9	7.46
G3HJD9	Transcription elongation factor SPT5 OS=Cricetulus griseus GN=I79_010783 PE=4 SV=1 - [G3HJD9_CRIGR]	27.49	0.0286	1	2	2	3	944	104.2	7.06
G3HYL0	Eukaryotic translation initiation factor 4 gamma 2 OS=Cricetulus griseus GN=I79_016148 PE=4 SV=1 - [G3HYL0_CRIGR]	65.18	0.0255	2	2	2	3	783	88.4	5.9
G3GX46	Transporter OS=Cricetulus griseus GN=I79_002358 PE=3 SV=1 - [G3GX46_CRIGR]	27.24	0.016	3	1	1	3	561	62.9	6.86
G3HUC0	Anionic trypsin-2 (Fragment) OS=Cricetulus griseus GN=I79_014528 PE=3 SV=1 - [G3HUC0_CRIGR]	43.84	0.0461	2	1	1	3	217	23.2	5.27
G3HRR5	ELAV-like protein 1 OS=Cricetulus griseus GN=I79_013537 PE=4 SV=1 - [G3HRR5_CRIGR]	143.83	0.0328	1	1	1	3	335	37.1	9.19
G3I2I1	DNA replication licensing factor MCM4 OS=Cricetulus griseus GN=I79_017612 PE=3 SV=1 - [G3I2I1_CRIGR]	21.14	0.0104	1	1	1	3	862	96.5	7.09
G3IA10	Heterogeneous nuclear ribonucleoprotein U-like protein 1 OS=Cricetulus griseus GN=I79_020426 PE=4 SV=1 - [G3IA10_CRIGR]	106.16	0.007	1	1	1	3	1566	176.4	7.2
G3HFG7	Putative hydroxypyruvate isomerase OS=Cricetulus griseus GN=I79_009307 PE=4 SV=1 - [G3HFG7_CRIGR]	42.19	0.0647	1	1	1	3	170	19	4.91
G3IH36	Small ubiquitin-related modifier 2 OS=Cricetulus griseus GN=I79_023115 PE=4 SV=1 - [G3IH36_CRIGR]	79.07	0.1263	4	1	1	3	95	10.8	5.5
O02659	Mannose-binding protein C OS=Bos taurus GN=MBL PE=2 SV=1 - [MBL2_BOVIN]	22.26	0.0884	1	2	2	3	249	26.5	5.2
G3GVV3	Putative uncharacterized protein OS=Cricetulus griseus GN=I79_001856 PE=4 SV=1 - [G3GVV3_CRIGR]	47.29	0.088	1	1	1	3	125	14.2	5.55
G3I4A6	Mps one binder kinase activator-like 1B OS=Cricetulus griseus GN=I79_018283 PE=4 SV=1 - [G3I4A6_CRIGR]	77.75	0.1528	1	1	1	3	72	8.7	8.57
G3GWT9	Putative aminopeptidase NPEPL1 OS=Cricetulus griseus GN=I79_002222 PE=4 SV=1 - [G3GWT9_CRIGR]	114.9	0.0282	1	1	1	3	425	45.1	5.94
Q95JC7	Neutral amino acid transporter B(0) OS=Bos taurus GN=SLC1A5 PE=2 SV=1 - [AAAT_BOVIN]	146.46	0.0204	1	1	1	3	539	56.4	5.76
G3H125	Neutral amino acid transporter A OS=Cricetulus griseus GN=I79_003849 PE=4 SV=1 - [G3H125_CRIGR]	137.1	0.0207	1	1	1	3	532	56.3	5.6
G3ING0	Tight junction protein ZO-2 OS=Cricetulus griseus GN=I79_025481 PE=4 SV=1 - [G3ING0_CRIGR]	156.63	0.0374	1	1	1	3	294	32.5	5.07
G3I0H0	Peptidyl-prolyl cis-trans isomerase NIMA-interacting 4 OS=Cricetulus griseus GN=I79_016855 PE=4 SV=1 - [G3I0H0_CRIGR]	39.78	0.1429	2	1	1	3	77	8.6	9.13
G3I9F1	Ras GTPase-activating protein-binding protein 2 OS=Cricetulus griseus GN=I79_020192 PE=4 SV=1 - [G3I9F1_CRIGR]	39.81	0.0456	1	1	2	3	482	54	5.49
G3IKQ6	Cystatin-B OS=Cricetulus griseus GN=I79_024459 PE=4 SV=1 - [G3IKQ6_CRIGR]	113.75	0.1224	1	1	1	3	98	11.2	7.43
G3HHA9	Annexin OS=Cricetulus griseus GN=I79_010006 PE=3 SV=1 - [G3HHA9_CRIGR]	72.39	0.0855	3	3	3	3	503	54.1	7.65
G3HSE8	Ras-related protein R-Ras2 (Fragment) OS=Cricetulus griseus GN=I79_013779 PE=4 SV=1 - [G3HSE8_CRIGR]	104.76	0.0779	1	1	1	3	154	18.1	5.02
G3HUD4	Proteasome activator complex subunit 1 OS=Cricetulus griseus GN=I79_014542 PE=4 SV=1 - [G3HUD4_CRIGR]	174.93	0.1412	2	1	1	3	85	10	6.14
G3I7W3	Dynactin subunit 1 OS=Cricetulus griseus GN=I79_019612 PE=4 SV=1 - [G3I7W3_CRIGR]	116.63	0.0215	1	1	1	3	559	63.9	4.97
G3HGQ1	Cation-independent mannose-6-phosphate receptor OS=Cricetulus griseus GN=I79_009791 PE=4 SV=1 - [G3HGQ1_CRIGR]	61.59	0.0135	2	2	2	3	1700	186.5	5.41
G3HH26	Exocyst complex component 4 OS=Cricetulus griseus GN=I79_009921 PE=4 SV=1 - [G3HH26_CRIGR]	179.76	0.0315	1	1	1	3	445	50.6	5.87
G3HU08	Poliovirus receptor-related protein 4 OS=Cricetulus griseus GN=I79_014376 PE=4 SV=1 - [G3HU08_CRIGR]	126.62	0.0298	1	1	1	3	436	48	5.29
G3GVV9	D-tyrosyl-tRNA(Tyr) deacylase OS=Cricetulus griseus GN=I79_001862 PE=3 SV=1 - [G3GVV9_CRIGR]	140.17	0.0766	2	1	1	3	209	23.3	7.87
G3H5A7	Tight junction protein ZO-1 OS=Cricetulus griseus GN=I79_005485 PE=4 SV=1 - [G3H5A7_CRIGR]	0	0.0289	1	2	2	3	762	86	6.54
G3H584	SPARC OS=Cricetulus griseus GN=I79_005459 PE=4 SV=1 - [G3H584_CRIGR]	0	0.0562	2	1	1	3	249	28.2	4.88
G3H2U4	BolA-like protein 1 OS=Cricetulus griseus GN=I79_004546 PE=3 SV=1 - [G3H2U4_CRIGR]	99.63	0.136	1	1	1	3	125	13	8.59
G3HEW0	Protein dpy-30-like OS=Cricetulus griseus GN=I79_009107 PE=4 SV=1 - [G3HEW0_CRIGR]	73.93	0.1616	2	1	1	3	99	11.2	4.88
G3H3J2	Ladinin-1 (Fragment) OS=Cricetulus griseus GN=I79_004840 PE=4 SV=1 - [G3H3J2_CRIGR]	55.79	0.0343	1	1	1	3	554	61.3	9.7
G3I2Q7	Transcription intermediary factor 1-beta OS=Cricetulus griseus GN=I79_017700 PE=4 SV=1 - [G3I2Q7_CRIGR]	97.37	0.0374	1	1	1	3	535	58	6.29
G3IJV7	Cytosolic acyl coenzyme A thioester hydrolase OS=Cricetulus griseus GN=I79_024146 PE=4 SV=1 - [G3IJV7_CRIGR]	85.27	0.0935	1	2	2	3	321	35.6	7.53
G3IAC8	Receptor-type tyrosine-protein phosphatase kappa OS=Cricetulus griseus GN=I79_020548 PE=4 SV=1 - [G3IAC8_CRIGR]	22.71	0.0396	1	2	2	3	858	96.2	6.83
G3H938	Protein archease OS=Cricetulus griseus GN=I79_006899 PE=4 SV=1 - [G3H938_CRIGR]	68.63	0.1737	3	2	2	3	167	19.6	4.51
G3HCI9	Scaffold attachment factor B1 OS=Cricetulus griseus GN=I79_008200 PE=4 SV=1 - [G3HCI9_CRIGR]	30.12	0.0226	1	1	1	3	929	102.8	5.21
G3H2S5	RNA-binding protein 8A OS=Cricetulus griseus GN=I79_004496 PE=4 SV=1 - [G3H2S5_CRIGR]	86.81	0.1111	3	1	1	3	171	19.5	5.72
G3GWV9	Nucleoprotein TPR OS=Cricetulus griseus GN=I79_002244 PE=4 SV=1 - [G3GWV9_CRIGR]	50.44	0.0132	1	2	2	3	2122	238.6	4.98
G3H571	Histidine triad nucleotide-binding protein 1 OS=Cricetulus griseus GN=I79_005446 PE=4 SV=1 - [G3H571_CRIGR]	30.41	0.2474	1	1	1	3	97	10.6	6.62
G3GXB1	THO complex subunit 4 OS=Cricetulus griseus GN=I79_002401 PE=4 SV=1 - [G3GXB1_CRIGR]	22.61	0.0588	2	1	1	3	187	20	9.92
G3IBF6	Sister chromatid cohesion protein PDS5-like A OS=Cricetulus griseus GN=I79_020976 PE=4 SV=1 - [G3IBF6_CRIGR]	44.05	0.0158	1	1	1	3	1138	128	8.12
G3I003	60S ribosomal protein L13a OS=Cricetulus griseus GN=I79_016670 PE=4 SV=1 - [G3I003_CRIGR]	37.49	0.2479	3	1	3	3	117	13.6	10.61
G3I7Q5	Zinc finger protein ZPR1 OS=Cricetulus griseus GN=I79_019552 PE=4 SV=1 - [G3I7Q5_CRIGR]	50.24	0.0696	2	3	3	3	503	55.4	4.75
G3H8D0	Guanine nucleotide-binding protein G(I), alpha-2 subunit OS=Cricetulus griseus GN=I79_006630 PE=4 SV=1 - [G3H8D0_CRIGR]	41.87	0.0385	1	1	1	3	338	38.7	5.43
G3H307	Cingulin OS=Cricetulus griseus GN=I79_004612 PE=4 SV=1 - [G3H307_CRIGR]	0	0.0274	1	1	1	3	328	38.2	5.19
G3HL12	Mps one binder kinase activator-like 3 OS=Cricetulus griseus GN=I79_011397 PE=4 SV=1 - [G3HL12_CRIGR]	23.54	0.0431	1	1	1	3	209	23.8	6.92
G3IKF5	Espin OS=Cricetulus griseus GN=I79_024357 PE=4 SV=1 - [G3IKF5_CRIGR]	0	0.009	1	1	1	3	1225	133.6	5.85
G3H277	Tyrosine-protein phosphatase non-receptor type 11 OS=Cricetulus griseus GN=I79_004244 PE=4 SV=1 - [G3H277_CRIGR]	34.37	0.0549	1	3	3	3	583	66.5	7.42
G3I5T6	Serine/threonine-protein phosphatase 5 OS=Cricetulus griseus GN=I79_018843 PE=4 SV=1 - [G3I5T6_CRIGR]	170.64	0.0214	1	1	1	3	607	67.5	8.24
G3HCX7	Phenylalanyl-tRNA synthetase alpha chain OS=Cricetulus griseus GN=I79_008345 PE=3 SV=1 - [G3HCX7_CRIGR]	31.22	0.0433	1	2	2	3	508	57.7	7.93
G3GVS3	Glycylpeptide N-tetradecanoyltransferase OS=Cricetulus griseus GN=I79_001820 PE=3 SV=1 - [G3GVS3_CRIGR]	231.62	0.0848	5	1	1	3	165	19	5.72
G3HRY8	SWI/SNF-related matrix-associated actin-dependent regulator of chromatin subfamily A member 5 OS=Cricetulus griseus GN=I79_013613 PE=4 SV=1 - [G3HRY8_CRIGR]	69.63	0.0129	1	1	1	3	1166	134.1	6.74
G3HR69	Serine/threonine-protein phosphatase 2A 56 kDa regulatory subunit delta isoform OS=Cricetulus griseus GN=I79_013332 PE=4 SV=1 - [G3HR69_CRIGR]	44.46	0.0372	2	2	2	3	592	68.9	8.18
G3GUX9	Bone morphogenetic protein 1 OS=Cricetulus griseus GN=I79_001504 PE=3 SV=1 - [G3GUX9_CRIGR]	29.12	0.0147	2	2	2	3	1019	114.3	6.83
Q2HJH7	Protein MEMO1 OS=Bos taurus GN=MEMO1 PE=2 SV=1 - [MEMO1_BOVIN]	131.36	0.0456	1	1	1	3	285	32.5	7.81
G3HTU6	Integrin beta-4 OS=Cricetulus griseus GN=I79_014326 PE=4 SV=1 - [G3HTU6_CRIGR]	27.51	0.051	1	1	1	3	157	17.3	6.55
G3HFB8	U6 snRNA-associated Sm-like protein LSm7 OS=Cricetulus griseus GN=I79_009274 PE=4 SV=1 - [G3HFB8_CRIGR]	33.4	0.0769	1	1	1	3	104	11.7	5.27
G3IH72	Ribosome maturation protein SBDS OS=Cricetulus griseus GN=I79_023156 PE=4 SV=1 - [G3IH72_CRIGR]	35.59	0.0497	2	1	1	3	181	21.1	9.17
G3H936	Uncharacterized protein KIAA1522 OS=Cricetulus griseus GN=I79_006898 PE=4 SV=1 - [G3H936_CRIGR]	23.9	0.0107	1	1	1	3	1029	106.2	9.6
G3HYU7	Exportin-5 OS=Cricetulus griseus GN=I79_016239 PE=4 SV=1 - [G3HYU7_CRIGR]	89.95	0.0083	1	1	1	3	1204	136.6	5.94
Q2KJ92	Beta-1,3-N-acetylglucosaminyltransferase lunatic fringe OS=Bos taurus GN=LFNG PE=2 SV=1 - [LFNG_BOVIN]	97.25	0.0289	1	1	1	3	380	41.8	8.72
G3HC18	Interleukin enhancer-binding factor 2 OS=Cricetulus griseus GN=I79_008061 PE=4 SV=1 - [G3HC18_CRIGR]	35.62	0.0973	1	1	1	3	113	12.8	9.25
G3HC25	Protein S100-A13 OS=Cricetulus griseus GN=I79_008068 PE=4 SV=1 - [G3HC25_CRIGR]	68.08	0.1122	2	1	1	3	98	11.2	5.31
G3GUJ2	Tetraspanin-9 OS=Cricetulus griseus GN=I79_001354 PE=4 SV=1 - [G3GUJ2_CRIGR]	105.23	0.1381	1	2	2	3	239	26.7	7.42
G3HHJ4	Vacuolar protein-sorting-associated protein 36 (Fragment) OS=Cricetulus griseus GN=I79_010081 PE=4 SV=1 - [G3HHJ4_CRIGR]	54.5	0.1073	2	3	3	3	354	39.9	7.78
G3GZH0	Nephrocystin-3 OS=Cricetulus griseus GN=I79_003230 PE=4 SV=1 - [G3GZH0_CRIGR]	23.34	0.0295	1	1	1	3	542	62.4	8.54
G3IME9	Olfactomedin-like protein 2A OS=Cricetulus griseus GN=I79_025088 PE=4 SV=1 - [G3IME9_CRIGR]	38.38	0.023	1	1	1	3	651	73.6	7.68
G3GXL9	NEDD9-interacting protein with calponin-likey and LIM domains OS=Cricetulus griseus GN=I79_002511 PE=4 SV=1 - [G3GXL9_CRIGR]	85.44	0.0464	1	1	1	3	345	37.8	9.32
G3GT78	Interleukin-1 receptor accessory protein OS=Cricetulus griseus GN=I79_000853 PE=4 SV=1 - [G3GT78_CRIGR]	29.61	0.0444	1	1	1	3	360	41.7	6.52
G3I142	Splicing factor 3 subunit 1 OS=Cricetulus griseus GN=I79_017088 PE=4 SV=1 - [G3I142_CRIGR]	109.58	0.0202	1	1	1	3	793	88.7	5.22
G3I9B1	Multiple coagulation factor deficiency protein 2-like OS=Cricetulus griseus GN=I79_020147 PE=4 SV=1 - [G3I9B1_CRIGR]	56.38	0.1172	1	1	1	3	145	16.2	4.72
G3II46	PHD finger-like domain-containing protein 5A OS=Cricetulus griseus GN=I79_023508 PE=4 SV=1 - [G3II46_CRIGR]	89.38	0.1222	1	2	2	3	180	19.4	7.46
G3H0T9	Huntingtin-interacting protein K OS=Cricetulus griseus GN=I79_003758 PE=4 SV=1 - [G3H0T9_CRIGR]	82.47	0.3306	1	2	2	3	121	13.6	4.82
G3H6B5	Interleukin enhancer-binding factor 3 OS=Cricetulus griseus GN=I79_005870 PE=4 SV=1 - [G3H6B5_CRIGR]	72.13	0.0297	1	2	2	3	909	97.5	8.95
G3ILH7	26S proteasome non-ATPase regulatory subunit 1 OS=Cricetulus griseus GN=I79_024743 PE=4 SV=1 - [G3ILH7_CRIGR]	27.76	0.0615	1	1	1	3	309	34.6	5.43
G3HKQ0	Coiled-coil domain-containing protein 72 OS=Cricetulus griseus GN=I79_011279 PE=4 SV=1 - [G3HKQ0_CRIGR]	22.13	0.1563	2	1	1	2	64	7.1	9.99
G3I4H5	Serine/threonine-protein phosphatase OS=Cricetulus griseus GN=I79_018354 PE=3 SV=1 - [G3I4H5_CRIGR]	29.87	0.0619	1	1	1	2	307	35.1	5.06
Q32PA0	U1 small nuclear ribonucleoprotein C OS=Bos taurus GN=SNRPC PE=2 SV=2 - [RU1C_BOVIN]	30.77	0.1132	1	1	1	2	159	17.4	9.67
G3HL97	Ras-related protein Rap-2b OS=Cricetulus griseus GN=I79_011483 PE=4 SV=1 - [G3HL97_CRIGR]	75.16	0.0874	1	1	1	2	183	20.5	4.81
Q29RI6	Calcium-binding protein 39 OS=Bos taurus GN=CAB39 PE=2 SV=1 - [CAB39_BOVIN]	83.53	0.0323	1	1	1	2	341	39.8	6.89
P68399	Casein kinase II subunit alpha OS=Bos taurus GN=CSNK2A1 PE=1 SV=1 - [CSK21_BOVIN]	32.21	0.0179	2	1	1	2	391	45.1	7.74
G3HNV5	U6 snRNA-associated Sm-like protein LSm8 OS=Cricetulus griseus GN=I79_012449 PE=4 SV=1 - [G3HNV5_CRIGR]	31.19	0.2133	2	1	1	2	75	8.1	4.35
P60984	Glia maturation factor beta OS=Bos taurus GN=GMFB PE=1 SV=2 - [GMFB_BOVIN]	114.23	0.1127	1	1	1	2	142	16.7	5.29
G3HE04	Splicing factor 3A subunit 3 OS=Cricetulus griseus GN=I79_008773 PE=4 SV=1 - [G3HE04_CRIGR]	33.13	0.018	1	1	1	2	501	58.8	5.34
P26779	Prosaposin OS=Bos taurus GN=PSAP PE=1 SV=3 - [SAP_BOVIN]	0	0.0152	1	1	1	2	525	58	5.2
P18902	Retinol-binding protein 4 OS=Bos taurus GN=RBP4 PE=1 SV=1 - [RET4_BOVIN]	26.35	0.1093	1	2	2	2	183	21.1	5.68
P33433	Histidine-rich glycoprotein (Fragments) OS=Bos taurus GN=HRG PE=1 SV=1 - [HRG_BOVIN]	112.09	0.0404	1	1	1	2	396	44.4	7.46
E1BF81	Corticosteroid-binding globulin OS=Bos taurus GN=SERPINA6 PE=3 SV=1 - [CBG_BOVIN]	44.69	0.0569	1	2	2	2	404	45.1	5.88
Q3ZBI6	Four and a half LIM domains protein 3 OS=Bos taurus GN=FHL3 PE=2 SV=1 - [FHL3_BOVIN]	44.99	0.0357	2	1	1	2	280	31.2	6.05
Q2TBW8	60S ribosomal protein L10-like OS=Bos taurus GN=RPL10L PE=2 SV=1 - [RL10L_BOVIN]	33.46	0.028	3	1	1	2	214	24.6	10.18
Q2TBQ8	6-phosphogluconolactonase OS=Bos taurus GN=PGLS PE=2 SV=1 - [6PGL_BOVIN]	31.33	0.0349	1	1	1	2	258	27.5	5.85
Q3T0L7	60S ribosomal protein L28 OS=Bos taurus GN=RPL28 PE=2 SV=3 - [RL28_BOVIN]	26.02	0.1095	3	2	2	2	137	15.7	11.97
P21758-2	Isoform II of Macrophage scavenger receptor types I and II OS=Bos taurus GN=MSR1 - [MSRE_BOVIN]	25.08	0.0287	2	1	1	2	349	38.4	5.4
G3IF79	Thyroid receptor-interacting protein 11 OS=Cricetulus griseus GN=I79_022396 PE=4 SV=1 - [G3IF79_CRIGR]	35.73	0.0076	2	1	2	2	1977	227	5.26
G3GXD5	COP9 signalosome complex subunit 1 OS=Cricetulus griseus GN=I79_002425 PE=4 SV=1 - [G3GXD5_CRIGR]	0	0.0232	1	1	1	2	475	53.9	7.02
G3HBR9	Putative RNA-binding protein Luc7-like 1 OS=Cricetulus griseus GN=I79_007868 PE=4 SV=1 - [G3HBR9_CRIGR]	45.91	0.0377	2	1	1	2	318	37.9	10.11
G3H761	Tetratricopeptide repeat protein 37 OS=Cricetulus griseus GN=I79_006187 PE=4 SV=1 - [G3H761_CRIGR]	30.57	0.0064	1	1	1	2	1563	174.2	6.8
G3IKN5	Glutathione S-transferase omega-1 OS=Cricetulus griseus GN=I79_024438 PE=3 SV=1 - [G3IKN5_CRIGR]	26.12	0.0692	1	2	2	2	318	36.5	6.9
G3HDM0	Neuropilin-2 OS=Cricetulus griseus GN=I79_008606 PE=4 SV=1 - [G3HDM0_CRIGR]	135.78	0.0165	1	1	1	2	909	102.2	5.53
G3IB69	Laminin subunit beta-2 OS=Cricetulus griseus GN=I79_020859 PE=4 SV=1 - [G3IB69_CRIGR]	42.7	0.0083	2	1	2	2	1800	195.9	6.64
G3H0Y9	EH domain-containing protein 4 OS=Cricetulus griseus GN=I79_003809 PE=4 SV=1 - [G3H0Y9_CRIGR]	41.37	0.0318	1	2	2	2	628	71.7	5.71
G3HG15	Ral guanine nucleotide dissociation stimulator-like 1 OS=Cricetulus griseus GN=I79_009534 PE=4 SV=1 - [G3HG15_CRIGR]	31.45	0.0079	1	1	1	2	760	85.4	6
G3H7G7	Polypeptide N-acetylgalactosaminyltransferase 12 (Fragment) OS=Cricetulus griseus GN=I79_006298 PE=3 SV=1 - [G3H7G7_CRIGR]	21.54	0.0153	1	1	1	2	457	53.3	6.23
G3IP80	Acyl-protein thioesterase 2 OS=Cricetulus griseus GN=I79_025784 PE=4 SV=1 - [G3IP80_CRIGR]	32.03	0.1585	1	2	2	2	164	17.7	7.42
G3HD94	Desmoplakin OS=Cricetulus griseus GN=I79_008473 PE=4 SV=1 - [G3HD94_CRIGR]	28.63	0.006	1	2	2	2	2836	328.2	6.92
Q32P66	UPF0587 protein C1orf123 homolog OS=Bos taurus PE=2 SV=1 - [CA123_BOVIN]	36.07	0.125	2	2	2	2	160	18.1	5.02
G3I5Z1	Arrestin domain-containing protein 1 OS=Cricetulus griseus GN=I79_018902 PE=4 SV=1 - [G3I5Z1_CRIGR]	0	0.0153	1	1	1	2	459	48.8	7.64
G3HK43	Ribonucleases P/MRP protein subunit POP1 OS=Cricetulus griseus GN=I79_011059 PE=4 SV=1 - [G3HK43_CRIGR]	23.27	0.0184	1	1	1	2	381	41.7	8.76
G3GVY7	Nardilysin OS=Cricetulus griseus GN=I79_001893 PE=3 SV=1 - [G3GVY7_CRIGR]	61.62	0.015	1	1	1	2	869	98.4	5.08
G3H983	Kelch repeat and BTB domain-containing protein 5 OS=Cricetulus griseus GN=I79_006949 PE=4 SV=1 - [G3H983_CRIGR]	35.87	0.0145	1	1	1	2	621	69.3	5.14
G3H756	Glutaredoxin-1 OS=Cricetulus griseus GN=I79_006182 PE=4 SV=1 - [G3H756_CRIGR]	35.02	0.0755	1	1	1	2	106	11.9	8.62
G3H6X6	Utrophin OS=Cricetulus griseus GN=I79_006097 PE=4 SV=1 - [G3H6X6_CRIGR]	20.9	0.0064	1	2	2	2	3291	376.5	5.3
G3HZE3	Sialidase-1 OS=Cricetulus griseus GN=I79_016442 PE=4 SV=1 - [G3HZE3_CRIGR]	98.51	0.0281	2	1	1	2	356	39	5.53
G3HID1	Ras-related protein Rab-7a OS=Cricetulus griseus GN=I79_010391 PE=3 SV=1 - [G3HID1_CRIGR]	29.9	0.0483	2	1	1	2	207	23.5	6.7
Q58D08	Pyrroline-5-carboxylate reductase 3 OS=Bos taurus GN=PYCRL PE=2 SV=1 - [P5CR3_BOVIN]	69.27	0.0357	1	1	1	2	308	32	7.24
G3I054	Proteasome assembly chaperone 1 OS=Cricetulus griseus GN=I79_016730 PE=4 SV=1 - [G3I054_CRIGR]	60.92	0.0346	1	1	1	2	289	32.9	6.52
G3IL48	Protein transport protein Sec31A OS=Cricetulus griseus GN=I79_024610 PE=4 SV=1 - [G3IL48_CRIGR]	55.02	0.0078	1	1	1	2	1160	126.1	7.03
G3H8A8	Mesencephalic astrocyte-derived neurotrophic factor OS=Cricetulus griseus GN=I79_006608 PE=4 SV=1 - [G3H8A8_CRIGR]	52.99	0.1106	1	2	2	2	217	24.6	8.47
G3I9X6	Spectrin alpha chain, brain OS=Cricetulus griseus GN=I79_020387 PE=4 SV=1 - [G3I9X6_CRIGR]	56.76	0.1302	1	2	2	2	215	24.9	4.87
G3IP86	Replication protein A 70 kDa DNA-binding subunit OS=Cricetulus griseus GN=I79_025790 PE=4 SV=1 - [G3IP86_CRIGR]	37.7	0.11	1	2	2	2	209	23.2	6.58
G3GWX6	Leukocyte elastase inhibitor A OS=Cricetulus griseus GN=I79_002261 PE=3 SV=1 - [G3GWX6_CRIGR]	30.95	0.0528	4	2	2	2	379	42.9	6.16
G3IFL2	Multifunctional protein ADE2 OS=Cricetulus griseus GN=I79_022535 PE=4 SV=1 - [G3IFL2_CRIGR]	94.72	0.1264	1	1	1	2	87	9.5	7.87
Q3SZC1	GrpE protein homolog 1, mitochondrial OS=Bos taurus GN=GRPEL1 PE=1 SV=1 - [GRPE1_BOVIN]	60.67	0.0507	2	1	1	2	217	24.3	8.13
G3HSQ5	mRNA cap guanine-N7 methyltransferase OS=Cricetulus griseus GN=I79_013899 PE=3 SV=1 - [G3HSQ5_CRIGR]	32.34	0.0269	1	1	1	2	446	51.4	6.48
G3I5E0	Methylosome subunit pICln OS=Cricetulus griseus GN=I79_018685 PE=4 SV=1 - [G3I5E0_CRIGR]	79.99	0.0551	1	1	1	2	236	26.1	4.13
G3I2N4	Lamina-associated polypeptide 2, isoforms alpha/zeta OS=Cricetulus griseus GN=I79_017678 PE=4 SV=1 - [G3I2N4_CRIGR]	50.1	0.0408	1	1	1	2	319	34.9	5.94
Q2T9Y6	Glutamate--cysteine ligase regulatory subunit OS=Bos taurus GN=GCLM PE=2 SV=1 - [GSH0_BOVIN]	54.13	0.1058	1	2	2	2	274	30.5	6.3
G3IDL5	Plakophilin-3 OS=Cricetulus griseus GN=I79_021798 PE=4 SV=1 - [G3IDL5_CRIGR]	0	0.0253	1	2	2	2	711	77.9	9.42
G3HWQ0	60S ribosomal protein L27a OS=Cricetulus griseus GN=I79_015428 PE=3 SV=1 - [G3HWQ0_CRIGR]	43.54	0.0876	2	1	1	2	137	16.1	11
G3I7J6	Non-POU domain-containing octamer-binding protein OS=Cricetulus griseus GN=I79_019488 PE=4 SV=1 - [G3I7J6_CRIGR]	43.4	0.031	1	1	2	2	613	69.6	5.2
G3HJN4	Vacuolar-sorting protein SNF8 OS=Cricetulus griseus GN=I79_010882 PE=4 SV=1 - [G3HJN4_CRIGR]	52.33	0.0543	1	1	1	2	258	28.9	6.65
G3HHX0	Interleukin-6 receptor subunit beta OS=Cricetulus griseus GN=I79_010231 PE=4 SV=1 - [G3HHX0_CRIGR]	41.55	0.0131	1	1	1	2	914	102.5	5.47
G3IMX6	PEST proteolytic signal-containing nuclear protein OS=Cricetulus griseus GN=I79_025281 PE=4 SV=1 - [G3IMX6_CRIGR]	38.48	0.0813	4	1	1	2	160	17.1	6.96
P79132	Caveolin-1 OS=Bos taurus GN=CAV1 PE=2 SV=1 - [CAV1_BOVIN]	28.18	0.0787	1	1	1	2	178	20.6	6.02
G3IHB4	Endothelial differentiation-related factor 1 OS=Cricetulus griseus GN=I79_023202 PE=4 SV=1 - [G3IHB4_CRIGR]	26.46	0.1415	2	1	1	2	106	11.7	9.99
Q29RK1	Citrate synthase, mitochondrial OS=Bos taurus GN=CS PE=1 SV=1 - [CISY_BOVIN]	88.82	0.0579	1	2	2	2	466	51.7	8.12
G3IGW8	AN1-type zinc finger protein 5 OS=Cricetulus griseus GN=I79_023045 PE=4 SV=1 - [G3IGW8_CRIGR]	114.32	0.0845	1	1	1	2	213	23.1	8.51
G3HDE3	Proteasome activator complex subunit 2 OS=Cricetulus griseus GN=I79_008547 PE=4 SV=1 - [G3HDE3_CRIGR]	57.44	0.1172	1	1	2	2	239	27.2	5.76
G3HWY2	Exostosin-2 OS=Cricetulus griseus GN=I79_015497 PE=4 SV=1 - [G3HWY2_CRIGR]	68.73	0.0456	1	2	2	2	701	80.1	6.55
Q3SWZ3	Syntaxin-4 OS=Bos taurus GN=STX4 PE=2 SV=1 - [STX4_BOVIN]	58.17	0.1178	2	2	2	2	297	34.4	6.58
G3II52	Oxysterol-binding protein (Fragment) OS=Cricetulus griseus GN=I79_023514 PE=3 SV=1 - [G3II52_CRIGR]	27.82	0.0272	1	2	2	2	736	84	7.02
G3HYU6	DNA-directed RNA polymerases I and III subunit RPAC1 OS=Cricetulus griseus GN=I79_016238 PE=4 SV=1 - [G3HYU6_CRIGR]	37.86	0.039	1	1	1	2	282	31.7	5.87
G3IIU8	Acyl carrier protein OS=Cricetulus griseus GN=I79_023776 PE=3 SV=1 - [G3IIU8_CRIGR]	34.83	0.0962	2	1	1	2	156	17.5	5.39
G3H0N3	Envelope glycoprotein OS=Cricetulus griseus GN=I79_003697 PE=4 SV=1 - [G3H0N3_CRIGR]	70.56	0.0423	4	1	1	2	189	21.3	8.28
G3GXY1	Beta-catenin-like protein 1 OS=Cricetulus griseus GN=I79_002626 PE=4 SV=1 - [G3GXY1_CRIGR]	58.32	0.0142	2	1	1	2	563	65	5.05
G3IEE6	Spermidine synthase OS=Cricetulus griseus GN=I79_022093 PE=3 SV=1 - [G3IEE6_CRIGR]	0	0.0512	1	1	1	2	254	28.7	5.48
G3IAN6	Protein fucU-like OS=Cricetulus griseus GN=I79_020662 PE=4 SV=1 - [G3IAN6_CRIGR]	64.02	0.0755	1	1	1	2	159	17	5.82
G3I4B3	High mobility group protein B3 OS=Cricetulus griseus GN=I79_018290 PE=4 SV=1 - [G3I4B3_CRIGR]	55.52	0.125	2	1	2	2	200	23	8.37
G3H8K2	Mannosyl-oligosaccharide 1,2-alpha-mannosidase IA OS=Cricetulus griseus GN=I79_006704 PE=4 SV=1 - [G3H8K2_CRIGR]	136.17	0.0346	1	1	1	2	492	56	6.49
G3IM40	26S proteasome non-ATPase regulatory subunit 1 OS=Cricetulus griseus GN=I79_024971 PE=4 SV=1 - [G3IM40_CRIGR]	29.83	0.039	1	2	2	2	539	59.6	5.22
G3I059	UBX domain-containing protein 1 OS=Cricetulus griseus GN=I79_016735 PE=4 SV=1 - [G3I059_CRIGR]	76.42	0.0751	1	1	1	2	213	23.2	4.59
G3H1S2	UDP-glucose:glycoprotein glucosyltransferase 1 OS=Cricetulus griseus GN=I79_004104 PE=4 SV=1 - [G3H1S2_CRIGR]	70.81	0.0113	1	1	1	2	1322	151.4	5.67
G3HDG6	Paraspeckle component 1 OS=Cricetulus griseus GN=I79_008512 PE=4 SV=1 - [G3HDG6_CRIGR]	21.84	0.0326	1	1	1	2	522	58.6	6.67
G3IH34	Apoptosis inhibitor 5 OS=Cricetulus griseus GN=I79_023113 PE=4 SV=1 - [G3IH34_CRIGR]	22.31	0.0156	1	1	1	2	513	57.7	5.92
G3I887	Peroxiredoxin-5, mitochondrial OS=Cricetulus griseus GN=I79_019750 PE=4 SV=1 - [G3I887_CRIGR]	38.97	0.1033	3	2	2	2	213	22.5	9.26
G3GSU7	WD repeat-containing protein 92 OS=Cricetulus griseus GN=I79_000718 PE=4 SV=1 - [G3GSU7_CRIGR]	22.72	0.0723	3	1	1	2	166	19.1	7.12
G3HQD5	Peptidyl-glycine alpha-amidating monooxygenase B OS=Cricetulus griseus GN=I79_013032 PE=4 SV=1 - [G3HQD5_CRIGR]	46.88	0.0411	1	2	2	2	851	94.7	6.54
G3GYD0	Kinesin-like protein KIF1C OS=Cricetulus griseus GN=I79_002804 PE=3 SV=1 - [G3GYD0_CRIGR]	43.13	0.006	1	1	1	2	1158	128.7	5.2
G3HYW3	Cullin-4B (Fragment) OS=Cricetulus griseus GN=I79_016255 PE=3 SV=1 - [G3HYW3_CRIGR]	55.51	0.0132	1	1	1	2	834	96.5	7.93
G3H1G2	Eukaryotic translation initiation factor 4E-binding protein 1 OS=Cricetulus griseus GN=I79_003987 PE=4 SV=1 - [G3H1G2_CRIGR]	33.03	0.0513	2	1	1	2	117	12.4	5.9
G3GXZ2	Lipopolysaccharide-binding protein OS=Cricetulus griseus GN=I79_002637 PE=4 SV=1 - [G3GXZ2_CRIGR]	30.49	0.0087	1	1	1	2	916	101.5	9.13
G3HAG8	AP-1 complex subunit gamma-1 OS=Cricetulus griseus GN=I79_007420 PE=4 SV=1 - [G3HAG8_CRIGR]	69.7	0.0109	1	1	1	2	822	91.4	6.8
G3H892	Aminoacylase-1A OS=Cricetulus griseus GN=I79_006592 PE=4 SV=1 - [G3H892_CRIGR]	0	0.0281	1	1	1	2	392	43.7	6.16
G3IBY2	Syntaxin-7 OS=Cricetulus griseus GN=I79_021166 PE=3 SV=1 - [G3IBY2_CRIGR]	45.96	0.0383	1	1	1	2	261	29.7	5.58
G3I2J0	Platelet-derived growth factor subunit B OS=Cricetulus griseus GN=I79_017626 PE=3 SV=1 - [G3I2J0_CRIGR]	22.33	0.0585	1	1	1	2	205	22.8	8.27
G3HEV3	Latent-transforming growth factor beta-binding protein 1 OS=Cricetulus griseus GN=I79_009100 PE=4 SV=1 - [G3HEV3_CRIGR]	117.66	0.0101	1	1	1	2	1194	130	5.11
G3HG40	Eukaryotic translation initiation factor 2A OS=Cricetulus griseus GN=I79_009559 PE=4 SV=1 - [G3HG40_CRIGR]	27.68	0.055	1	2	2	2	582	64.6	8.91
G3HXM0	NFU1 iron-sulfur cluster scaffold-like, mitochondrial OS=Cricetulus griseus GN=I79_015748 PE=4 SV=1 - [G3HXM0_CRIGR]	131.04	0.0457	1	1	1	2	328	37.1	8.16
A4FUI1	Coiled-coil domain-containing protein 58 OS=Bos taurus GN=CCDC58 PE=2 SV=1 - [CCD58_BOVIN]	51.35	0.2569	2	2	2	2	144	16.7	7.3
G3H0A7	Eukaryotic translation initiation factor 3 subunit H (Fragment) OS=Cricetulus griseus GN=I79_003561 PE=3 SV=1 - [G3H0A7_CRIGR]	32.3	0.1122	1	1	2	2	294	34.2	5.87
G3HHD4	Putative adenylate kinase 7 OS=Cricetulus griseus GN=I79_010033 PE=4 SV=1 - [G3HHD4_CRIGR]	0	0.0262	1	1	1	2	648	73.9	4.82
G3HWH8	Transcription factor BTF3 OS=Cricetulus griseus GN=I79_015361 PE=4 SV=1 - [G3HWH8_CRIGR]	20.65	0.1173	2	1	1	2	162	17.7	6.95
Q8SPP7	Peptidoglycan recognition protein 1 OS=Bos taurus GN=PGLYRP1 PE=1 SV=1 - [PGRP1_BOVIN]	41.22	0.1053	1	1	1	2	190	21	9.5
Q1JQ98	AP-1 complex subunit sigma-1A OS=Bos taurus GN=AP1S1 PE=2 SV=1 - [AP1S1_BOVIN]	65.1	0.1465	1	2	2	2	157	18.6	5.73
G3I7Q1	Apolipoprotein A-I OS=Cricetulus griseus GN=I79_019548 PE=3 SV=1 - [G3I7Q1_CRIGR]	27.81	0.0341	1	1	1	2	264	30.5	6.02
G3HAT2	NMDA receptor-regulated protein 1 OS=Cricetulus griseus GN=I79_007540 PE=4 SV=1 - [G3HAT2_CRIGR]	21.82	0.0335	1	2	2	2	656	76.7	6.16
G3IP18	Tight junction protein ZO-2 OS=Cricetulus griseus GN=I79_025719 PE=4 SV=1 - [G3IP18_CRIGR]	25.68	0.0684	1	1	1	2	190	21.6	10.04
G3GXU1	Protein phosphatase 1G OS=Cricetulus griseus GN=I79_002584 PE=3 SV=1 - [G3GXU1_CRIGR]	23.19	0.0685	2	2	2	2	496	54	4.3
G3H6T8	Vacuolar protein sorting-associated protein 26A OS=Cricetulus griseus GN=I79_006057 PE=4 SV=1 - [G3H6T8_CRIGR]	23.69	0.052	2	1	1	2	327	38.1	6.57
G3ILF3	Glutathione S-transferase Mu 7 OS=Cricetulus griseus GN=I79_024718 PE=3 SV=1 - [G3ILF3_CRIGR]	72.96	0.078	3	1	1	2	218	25.9	7.37
A5PJI5	ATPase ASNA1 OS=Bos taurus GN=ASNA1 PE=2 SV=1 - [ASNA_BOVIN]	22.15	0.0287	2	1	1	1	348	38.8	4.91
G3I4N5	Gamma-aminobutyric acid receptor-associated protein-like 2 OS=Cricetulus griseus GN=I79_018418 PE=3 SV=1 - [G3I4N5_CRIGR]	26.85	0.0684	1	1	1	1	117	13.7	8.1
G3IJ85	Ubiquitin-conjugating enzyme E2 D3 OS=Cricetulus griseus GN=I79_023918 PE=3 SV=1 - [G3IJ85_CRIGR]	0	0.1633	1	1	1	1	147	16.7	7.8
Q2NL29	Inositol-3-phosphate synthase 1 OS=Bos taurus GN=ISYNA1 PE=2 SV=1 - [INO1_BOVIN]	44.94	0.0233	1	1	1	1	557	60.7	6
Q29RZ2	Peptidylprolyl isomerase domain and WD repeat-containing protein 1 OS=Bos taurus GN=PPWD1 PE=2 SV=1 - [PPWD1_BOVIN]	22.66	0.0217	2	1	1	1	644	73.2	7.39
Q5EAB6	Protein O-linked-mannose beta-1,2-N-acetylglucosaminyltransferase 1 OS=Bos taurus GN=POMGNT1 PE=2 SV=1 - [PMGT1_BOVIN]	0	0.0106	1	1	1	1	660	75	6.71
Q3SYW2	Complement C2 OS=Bos taurus GN=C2 PE=2 SV=1 - [CO2_BOVIN]	31.95	0.0133	2	1	1	1	750	82.9	8.34
P23132	Lithostathine OS=Bos taurus GN=PTP PE=1 SV=1 - [LITH_BOVIN]	35.12	0.0629	1	1	1	1	175	19.3	6.15
P04815	Spleen trypsin inhibitor I OS=Bos taurus PE=1 SV=2 - [BPT2_BOVIN]	39.57	0.13	1	1	1	1	100	10.8	8.66
Q9N2I2	Plasma serine protease inhibitor OS=Bos taurus GN=SERPINA5 PE=1 SV=1 - [IPSP_BOVIN]	39.18	0.0198	1	1	1	1	404	45.3	9.36
Q56JY1	60S ribosomal protein L35a OS=Bos taurus GN=RPL35A PE=3 SV=1 - [RL35A_BOVIN]	27.57	0.0727	1	1	1	1	110	12.5	11.06
Q0P5A6	26S proteasome non-ATPase regulatory subunit 5 OS=Bos taurus GN=PSMD5 PE=2 SV=1 - [PSMD5_BOVIN]	27.01	0.0199	1	1	1	1	503	56	5.27
Q5E963	Actin-related protein 2/3 complex subunit 5-like protein OS=Bos taurus GN=ARPC5L PE=2 SV=1 - [ARP5L_BOVIN]	45.58	0.0784	1	1	1	1	153	16.9	6.6
Q5E954	DnaJ homolog subfamily A member 1 OS=Bos taurus GN=DNAJA1 PE=2 SV=2 - [DNJA1_BOVIN]	0	0.0151	1	1	1	1	397	44.9	7.08
G3IIG7	Centromere-associated protein E OS=Cricetulus griseus GN=I79_023638 PE=3 SV=1 - [G3IIG7_CRIGR]	0	0.0063	1	1	1	1	2379	275	5.3
G3H233	Phosphoinositide phospholipase C OS=Cricetulus griseus GN=I79_004234 PE=4 SV=1 - [G3H233_CRIGR]	0	0.0043	1	1	1	1	1610	178.8	7.34
G3HK27	Afadin OS=Cricetulus griseus GN=I79_011045 PE=4 SV=1 - [G3HK27_CRIGR]	0	0.0125	1	1	1	1	1605	181.9	5.83
G3HII3	Centrosomal protein of 290 kDa OS=Cricetulus griseus GN=I79_010454 PE=4 SV=1 - [G3HII3_CRIGR]	21.07	0.0055	1	1	1	1	2172	253.7	6.42
G3HHX7	Superkiller viralicidic activity 2-like 2 OS=Cricetulus griseus GN=I79_010238 PE=4 SV=1 - [G3HHX7_CRIGR]	27.93	0.0118	1	1	1	1	851	96.1	6.1
G3ID84	Liprin-beta-2 OS=Cricetulus griseus GN=I79_021657 PE=4 SV=1 - [G3ID84_CRIGR]	0	0.0135	1	1	1	1	891	99.2	6.44
G3IFL3	Signal recognition particle 72 kDa protein OS=Cricetulus griseus GN=I79_022536 PE=4 SV=1 - [G3IFL3_CRIGR]	50.54	0.0357	1	1	1	1	476	52.9	9.64
G3ICC2	BAG family molecular chaperone regulator 3 OS=Cricetulus griseus GN=I79_021315 PE=4 SV=1 - [G3ICC2_CRIGR]	15.41	0.0175	1	1	1	1	571	61.1	6.96
G3H2E4	Collagen alpha-1(XXIII) chain OS=Cricetulus griseus GN=I79_004354 PE=4 SV=1 - [G3H2E4_CRIGR]	32.73	0.05	2	1	1	1	120	11.6	5.48
G3HZ57	Neuropilin-1 OS=Cricetulus griseus GN=I79_016352 PE=4 SV=1 - [G3HZ57_CRIGR]	23.62	0.0152	1	1	1	1	923	103	5.94
G3IAI5	DNA replication licensing factor MCM5 OS=Cricetulus griseus GN=I79_020608 PE=3 SV=1 - [G3IAI5_CRIGR]	22.9	0.0177	2	1	1	1	734	82.3	8.44
G3GZF9	WD repeat-containing protein 82 OS=Cricetulus griseus GN=I79_003259 PE=4 SV=1 - [G3GZF9_CRIGR]	55.31	0.0707	1	1	1	1	283	31.7	8.32
G3I6H5	Fermitin family-like 2 OS=Cricetulus griseus GN=I79_019099 PE=4 SV=1 - [G3I6H5_CRIGR]	35.67	0.033	1	1	1	1	575	65.6	6.3
G3ICS3	Cullin-3 OS=Cricetulus griseus GN=I79_021472 PE=3 SV=1 - [G3ICS3_CRIGR]	38.54	0.0174	1	1	1	1	746	86.4	7.99
G3I5U3	Striatin-4 OS=Cricetulus griseus GN=I79_018851 PE=4 SV=1 - [G3I5U3_CRIGR]	18.26	0.019	2	1	1	1	526	57.1	5.39
G3HUW2	Striatin OS=Cricetulus griseus GN=I79_014730 PE=4 SV=1 - [G3HUW2_CRIGR]	0	0.0192	1	1	1	1	677	75.1	5.16
G3I449	Tubulin-specific chaperone D OS=Cricetulus griseus GN=I79_018226 PE=4 SV=1 - [G3I449_CRIGR]	16.4	0.0079	1	1	1	1	1134	126.4	6.84
G3HSG5	Protein TFG (Fragment) OS=Cricetulus griseus GN=I79_013796 PE=4 SV=1 - [G3HSG5_CRIGR]	0	0.0504	1	1	1	1	337	36.1	5.01
G3I885	Steroid hormone receptor ERR1 (Fragment) OS=Cricetulus griseus GN=I79_019748 PE=3 SV=1 - [G3I885_CRIGR]	0	0.0109	1	1	1	1	548	59.9	6.34
G3GTB3	5-formyltetrahydrofolate cyclo-ligase OS=Cricetulus griseus GN=I79_000890 PE=4 SV=1 - [G3GTB3_CRIGR]	26.77	0.0296	1	1	1	1	203	23.2	7.09
G3GSZ3	U2-associated protein SR140 OS=Cricetulus griseus GN=I79_000765 PE=4 SV=1 - [G3GSZ3_CRIGR]	0	0.0123	1	1	1	1	649	73.9	9.33
O18756	D-glucuronyl C5-epimerase OS=Bos taurus GN=GLCE PE=1 SV=2 - [GLCE_BOVIN]	37.94	0.0162	2	1	1	1	617	69.9	8.91
G3IHG7	Coiled-coil domain-containing protein 15 OS=Cricetulus griseus GN=I79_023257 PE=4 SV=1 - [G3IHG7_CRIGR]	34.53	0.009	1	1	1	1	775	89.4	7.33
G3I0Q4	Platelet-activating factor acetylhydrolase IB subunit beta OS=Cricetulus griseus GN=I79_016943 PE=4 SV=1 - [G3I0Q4_CRIGR]	47.19	0.0652	2	1	1	1	138	15.1	7.46
G3H3H6	ADP-ribosylation factor-like protein 8A OS=Cricetulus griseus GN=I79_004823 PE=4 SV=1 - [G3H3H6_CRIGR]	36.46	0.0652	3	1	1	1	138	15.8	8.44
G3HPJ3	Alpha-amylase OS=Cricetulus griseus GN=I79_012707 PE=3 SV=1 - [G3HPJ3_CRIGR]	35.35	0.0239	1	1	1	1	418	46.9	8
G3H9B2	Myoferlin OS=Cricetulus griseus GN=I79_006979 PE=4 SV=1 - [G3H9B2_CRIGR]	30.12	0.011	1	1	1	1	1449	163.5	6.24
G3HH35	60S ribosomal protein L36a OS=Cricetulus griseus GN=I79_009931 PE=4 SV=1 - [G3HH35_CRIGR]	21.21	0.0865	4	1	1	1	104	12.1	10.76
A1L5A6	Proteasomal ubiquitin receptor ADRM1 OS=Bos taurus GN=ADRM1 PE=2 SV=1 - [ADRM1_BOVIN]	41.37	0.0221	2	1	1	1	407	41.9	4.91
G3HSR4	Transporter OS=Cricetulus griseus GN=I79_013908 PE=3 SV=1 - [G3HSR4_CRIGR]	21.25	0.0165	1	1	1	1	729	81.5	5.33
Q0II64	SUN domain-containing protein 3 OS=Bos taurus GN=SUN3 PE=2 SV=2 - [SUN3_BOVIN]	0	0.0278	1	1	1	1	360	40.6	7.56
G3IN68	CD2 antigen cytoplasmic tail-binding protein 2 OS=Cricetulus griseus GN=I79_025380 PE=4 SV=1 - [G3IN68_CRIGR]	34.5	0.0411	1	1	1	1	341	37.5	4.61
G3HKF3	Ankycorbin OS=Cricetulus griseus GN=I79_011173 PE=4 SV=1 - [G3HKF3_CRIGR]	22.65	0.0105	1	1	1	1	949	105.8	5.88
G3I8V8	DnaJ-like subfamily A member 1 OS=Cricetulus griseus GN=I79_019990 PE=4 SV=1 - [G3I8V8_CRIGR]	65.01	0.0793	2	1	1	1	164	18.1	9.14
Q6E6J6	Chromobox protein-like 5 OS=Cricetulus griseus GN=HP1 alpha PE=2 SV=1 - [Q6E6J6_CRIGR]	56.98	0.0628	1	1	1	1	191	22.2	5.86
G3HPR6	Tubulin-folding cofactor B OS=Cricetulus griseus GN=I79_012784 PE=4 SV=1 - [G3HPR6_CRIGR]	60.52	0.0829	1	1	1	1	193	21.7	4.88
G3I6H3	Splicing factor 1 OS=Cricetulus griseus GN=I79_019082 PE=4 SV=1 - [G3I6H3_CRIGR]	29.7	0.0479	1	1	1	1	522	56.7	9.23
G3GX68	Nuclear protein localization protein 4-like OS=Cricetulus griseus GN=I79_002383 PE=4 SV=1 - [G3GX68_CRIGR]	31.24	0.0645	1	1	1	1	217	24.3	4.73
A2VDL4	Neutral amino acid transporter A OS=Bos taurus GN=SLC1A4 PE=2 SV=1 - [SATT_BOVIN]	35.29	0.0283	1	1	1	1	530	56	6.25
G3IG96	Glutamate--cysteine ligase regulatory subunit OS=Cricetulus griseus GN=I79_022778 PE=4 SV=1 - [G3IG96_CRIGR]	50.67	0.0667	1	1	1	1	225	25.5	5.12
G3IFB0	Serine/arginine repetitive matrix protein 2 OS=Cricetulus griseus GN=I79_022432 PE=4 SV=1 - [G3IFB0_CRIGR]	58.2	0.0075	1	1	1	1	2791	303.7	11.96
G3H7T9	E3 ubiquitin-protein ligase HUWE1 (Fragment) OS=Cricetulus griseus GN=I79_006430 PE=4 SV=1 - [G3H7T9_CRIGR]	0	0.0026	1	1	1	1	4178	460.4	5.2
G3H487	Regulator of nonsense transcripts 1 OS=Cricetulus griseus GN=I79_005087 PE=4 SV=1 - [G3H487_CRIGR]	25.56	0.013	1	1	1	1	771	85	8.79
G3GZY4	Lysyl oxidase-like 4 OS=Cricetulus griseus GN=I79_003432 PE=4 SV=1 - [G3GZY4_CRIGR]	0	0.0185	1	1	1	1	757	84.7	7.97
G3HBN4	C-jun-amino-terminal kinase-interacting protein 3 OS=Cricetulus griseus GN=I79_007938 PE=4 SV=1 - [G3HBN4_CRIGR]	0	0.0084	2	1	1	1	1073	116.9	5.95
G3HMB1	Putative ATP-dependent RNA helicase DDX56 OS=Cricetulus griseus GN=I79_011862 PE=4 SV=1 - [G3HMB1_CRIGR]	0	0.011	2	1	1	1	545	61.2	9
G3HLK3	Granulins OS=Cricetulus griseus GN=I79_011593 PE=4 SV=1 - [G3HLK3_CRIGR]	20.96	0.022	1	1	1	1	592	63.9	6.43
G3I0S8	Hepatocyte nuclear factor 4-alpha OS=Cricetulus griseus GN=I79_016967 PE=3 SV=1 - [G3I0S8_CRIGR]	0	0.0216	1	1	1	1	464	51.5	7.08
P00366	Glutamate dehydrogenase 1, mitochondrial OS=Bos taurus GN=GLUD1 PE=1 SV=2 - [DHE3_BOVIN]	25.66	0.0197	1	1	1	1	558	61.5	7.59
A9Q1J7	Developmental pluripotency-associated protein 3 OS=Bos taurus GN=DPPA3 PE=2 SV=1 - [DPPA3_BOVIN]	0	0.0368	5	1	1	1	163	19.1	8.25
G3HNU4	Chromodomain-helicase-DNA-binding protein 1 OS=Cricetulus griseus GN=I79_012438 PE=4 SV=1 - [G3HNU4_CRIGR]	23.52	0.0035	2	1	1	1	1710	196.4	7.28
G3GT75	Coiled-coil domain-containing protein 50 OS=Cricetulus griseus GN=I79_000849 PE=4 SV=1 - [G3GT75_CRIGR]	25.75	0.0238	1	1	1	1	505	58.2	8.65
G3GZF3	Alpha-1,6-mannosylglycoprotein 6-beta-N-acetylglucosaminyltransferase A OS=Cricetulus griseus GN=I79_003217 PE=4 SV=1 - [G3GZF3_CRIGR]	25.37	0.0095	1	1	1	1	740	84.5	8.25
G3I408	Ankyrin repeat domain-containing protein 13D OS=Cricetulus griseus GN=I79_018179 PE=4 SV=1 - [G3I408_CRIGR]	26.89	0.0114	1	1	1	1	616	69	5.38
G3I369	Golgi apparatus protein 1 OS=Cricetulus griseus GN=I79_017870 PE=4 SV=1 - [G3I369_CRIGR]	0	0.0584	1	1	1	1	308	35.1	8
G3GUK0	Putative fructose-2,6-bisphosphatase TIGAR OS=Cricetulus griseus GN=I79_001362 PE=4 SV=1 - [G3GUK0_CRIGR]	31.42	0.0414	1	1	1	1	266	29.2	6.67
A5PKH3	Fumarylacetoacetase OS=Bos taurus GN=FAH PE=2 SV=1 - [FAAA_BOVIN]	38.05	0.0286	1	1	1	1	419	46.1	6.98
G3HXY1	PDZ and LIM domain protein 1 OS=Cricetulus griseus GN=I79_015897 PE=4 SV=1 - [G3HXY1_CRIGR]	22.25	0.0942	1	1	1	1	329	35.9	7.06
G3I3G7	Epidermal growth factor receptor kinase substrate 8-like protein 2 (Fragment) OS=Cricetulus griseus GN=I79_017973 PE=4 SV=1 - [G3I3G7_CRIGR]	62.85	0.0235	1	1	1	1	680	76.7	7.93
G3GXY4	Regulation of nuclear pre-mRNA domain-containing protein 1B OS=Cricetulus griseus GN=I79_002629 PE=4 SV=1 - [G3GXY4_CRIGR]	27.07	0.046	1	1	1	1	326	36.9	5.97
G3HP69	Calnexin OS=Cricetulus griseus GN=I79_012575 PE=3 SV=1 - [G3HP69_CRIGR]	55.09	0.0271	1	1	1	1	591	67.2	4.63
G3IAE3	UPF0568 protein C14orf166-like OS=Cricetulus griseus GN=I79_020563 PE=4 SV=1 - [G3IAE3_CRIGR]	39.47	0.1455	1	1	1	1	110	12.3	6.95
G3HF77	40S ribosomal protein S15 OS=Cricetulus griseus GN=I79_009233 PE=3 SV=1 - [G3HF77_CRIGR]	33.82	0.1696	2	1	1	1	112	13	10.89
G3GVL1	Transient receptor potential cation channel subfamily V member 2 OS=Cricetulus griseus GN=I79_001750 PE=4 SV=1 - [G3GVL1_CRIGR]	0	0.0093	1	1	1	1	756	86	6.62
A4IF63	Tripartite motif-containing protein 2 OS=Bos taurus GN=TRIM2 PE=2 SV=1 - [TRIM2_BOVIN]	31.2	0.0081	2	1	1	1	744	81.4	6.87
G3HGI4	Hypoxanthine-guanine phosphoribosyltransferase OS=Cricetulus griseus GN=I79_009717 PE=4 SV=1 - [G3HGI4_CRIGR]	23.87	0.0921	1	1	1	1	76	8.8	9.61
G3HNN8	Long-chain-fatty-acid--CoA ligase 4 OS=Cricetulus griseus GN=I79_012377 PE=4 SV=1 - [G3HNN8_CRIGR]	24.44	0.0219	2	1	1	1	274	30.5	5.97
G3HA55	Plasminogen activator inhibitor 1 OS=Cricetulus griseus GN=I79_007297 PE=4 SV=1 - [G3HA55_CRIGR]	37.81	0.0648	1	1	1	1	108	11.7	9.2
G3INR8	[Pyruvate dehydrogenase [acetyl-transferring]]-phosphatase 2, mitochondrial OS=Cricetulus griseus GN=I79_025601 PE=4 SV=1 - [G3INR8_CRIGR]	0	0.0289	2	1	1	1	242	26.9	6.79
G3HLE7	Putative uncharacterized protein OS=Cricetulus griseus GN=I79_011535 PE=4 SV=1 - [G3HLE7_CRIGR]	22.73	0.1538	1	1	1	1	52	5.3	8.13
G3IFJ6	Glutathione S-transferase A6 OS=Cricetulus griseus GN=I79_022519 PE=4 SV=1 - [G3IFJ6_CRIGR]	23.93	0.0372	1	1	1	1	242	27.6	5.91
G3H2M8	Plexin-A2 OS=Cricetulus griseus GN=I79_004445 PE=4 SV=1 - [G3H2M8_CRIGR]	28.82	0.0214	1	1	1	1	467	51.7	6.7
G3I4I4	Transmembrane protein 219 OS=Cricetulus griseus GN=I79_018363 PE=4 SV=1 - [G3I4I4_CRIGR]	0	0.0331	1	1	1	1	272	29	7.58
G3IGH6	Transcription elongation factor SPT6 OS=Cricetulus griseus GN=I79_022891 PE=4 SV=1 - [G3IGH6_CRIGR]	38.88	0.0058	1	1	1	1	1725	198.8	4.92
G3IC14	Exocyst complex component 5 OS=Cricetulus griseus GN=I79_021201 PE=4 SV=1 - [G3IC14_CRIGR]	24.75	0.0138	1	1	1	1	651	75.2	6.71
G3H748	Endoplasmic reticulum aminopeptidase 1 OS=Cricetulus griseus GN=I79_006174 PE=4 SV=1 - [G3H748_CRIGR]	38.18	0.0106	1	1	1	1	941	107.4	6.15
G3IG25	ATP-dependent RNA helicase DDX19A OS=Cricetulus griseus GN=I79_022702 PE=4 SV=1 - [G3IG25_CRIGR]	36.56	0.0314	3	1	1	1	478	53.9	6.67
G3H194	Clathrin light chain B (Fragment) OS=Cricetulus griseus GN=I79_003918 PE=4 SV=1 - [G3H194_CRIGR]	28.53	0.0662	3	1	1	1	151	17.4	5.53
G3I6H6	Glucosamine 6-phosphate N-acetyltransferase OS=Cricetulus griseus GN=I79_019100 PE=4 SV=1 - [G3I6H6_CRIGR]	35.84	0.0598	1	1	1	1	184	20.7	7.15
G3HD20	PDZ domain-containing protein GIPC1 OS=Cricetulus griseus GN=I79_008393 PE=4 SV=1 - [G3HD20_CRIGR]	37.82	0.039	1	1	1	1	333	36	5.76
Q32LK2	Cysteine-rich and transmembrane domain-containing protein 1 OS=Bos taurus GN=CYSTM1 PE=3 SV=1 - [CYTM1_BOVIN]	41.23	0.0971	1	1	1	1	103	11.1	4.44
G3HRQ3	SWI/SNF complex subunit SMARCC2 OS=Cricetulus griseus GN=I79_013500 PE=4 SV=1 - [G3HRQ3_CRIGR]	23.47	0.0098	1	1	1	1	1122	121.9	5.35
G3H3P5	Kinesin-1 heavy chain OS=Cricetulus griseus GN=I79_004874 PE=3 SV=1 - [G3H3P5_CRIGR]	36.18	0.0141	3	1	1	1	778	87.8	6.34
G3HPH9	CMP-N-acetylneuraminate-beta-galactosamide-alpha-2, 3-sialyltransferase OS=Cricetulus griseus GN=I79_012691 PE=4 SV=1 - [G3HPH9_CRIGR]	29.82	0.0625	2	1	1	1	208	23.9	9.63
G3IMV0	Protein phosphatase methylesterase 1 OS=Cricetulus griseus GN=I79_025248 PE=4 SV=1 - [G3IMV0_CRIGR]	28.15	0.0732	2	1	1	1	164	17.8	7.27
G3GW35	von Willebrand factor D and EGF domain-containing protein (Fragment) OS=Cricetulus griseus GN=I79_001946 PE=4 SV=1 - [G3GW35_CRIGR]	29.65	0.0137	1	1	1	1	804	91.9	6.25
G3HUQ0	UPF0363 protein C7orf20-like OS=Cricetulus griseus GN=I79_014664 PE=4 SV=1 - [G3HUQ0_CRIGR]	33.25	0.0438	1	1	1	1	274	30.6	4.98
G3GZW7	RRP12-like protein OS=Cricetulus griseus GN=I79_003416 PE=4 SV=1 - [G3GZW7_CRIGR]	36.71	0.0101	1	1	1	1	1390	153.1	8.31
G3GVN0	Phosphomannomutase OS=Cricetulus griseus GN=I79_001774 PE=3 SV=1 - [G3GVN0_CRIGR]	32.89	0.0537	1	1	1	1	242	27.7	6.68
G3HHM7	Guanylate kinase OS=Cricetulus griseus GN=I79_010131 PE=4 SV=1 - [G3HHM7_CRIGR]	43.99	0.0762	1	1	1	1	210	23	8.28
G3H8K1	Acyl-protein thioesterase 1 OS=Cricetulus griseus GN=I79_006703 PE=4 SV=1 - [G3H8K1_CRIGR]	29.68	0.1	2	1	1	1	140	15.2	7.34
G3HJF9	Centrin-2 OS=Cricetulus griseus GN=I79_010804 PE=4 SV=1 - [G3HJF9_CRIGR]	37.72	0.0798	3	1	1	1	163	18.6	4.86
G3HZD3	Tenascin-X OS=Cricetulus griseus GN=I79_016432 PE=4 SV=1 - [G3HZD3_CRIGR]	39.48	0.0116	1	1	1	1	1297	142	5.16
G3HTU4	SAP30-binding protein OS=Cricetulus griseus GN=I79_014324 PE=4 SV=1 - [G3HTU4_CRIGR]	48.8	0.0487	1	1	1	1	308	33.7	4.84
G3GX54	Charged multivesicular body protein 6 OS=Cricetulus griseus GN=I79_002367 PE=4 SV=1 - [G3GX54_CRIGR]	26.94	0.0795	1	1	1	1	176	20.4	5.14
G3HM82	Sister chromatid cohesion protein PDS5-like B OS=Cricetulus griseus GN=I79_011831 PE=4 SV=1 - [G3HM82_CRIGR]	42.7	0.0127	1	1	1	1	1418	161.1	8.51
G3HPP2	4-trimethylaminobutyraldehyde dehydrogenase OS=Cricetulus griseus GN=I79_012757 PE=3 SV=1 - [G3HPP2_CRIGR]	34.66	0.0322	1	1	1	1	497	54.1	6.44
G3HHY9	V-type proton ATPase subunit G 1 OS=Cricetulus griseus GN=I79_010250 PE=4 SV=1 - [G3HHY9_CRIGR]	58.58	0.1356	3	1	1	1	118	13.7	7.99
G3HLV2	Cytosolic 5'-nucleotidase III-like protein OS=Cricetulus griseus GN=I79_011696 PE=4 SV=1 - [G3HLV2_CRIGR]	33.42	0.0567	1	1	1	1	300	34.4	5.92
G3HR10	Dihydropteridine reductase OS=Cricetulus griseus GN=I79_013270 PE=4 SV=1 - [G3HR10_CRIGR]	89.54	0.0747	2	1	1	1	241	25.6	7.81
G3GRY7	Heat shock factor-binding protein 1 OS=Cricetulus griseus GN=I79_000282 PE=4 SV=1 - [G3GRY7_CRIGR]	29.02	0.1484	1	1	1	1	128	14.4	5.16
G3HDQ9	UDP-GlcNAc:betaGal beta-1,3-N-acetylglucosaminyltransferase 2 OS=Cricetulus griseus GN=I79_008645 PE=4 SV=1 - [G3HDQ9_CRIGR]	0	0.0202	1	1	1	1	397	46.2	9.2
G3HUK9	Peptidyl-prolyl cis-trans isomerase (Fragment) OS=Cricetulus griseus GN=I79_014621 PE=3 SV=1 - [G3HUK9_CRIGR]	0	0.1188	1	1	1	1	160	18	6.79
G3H817	Olfactory receptor OS=Cricetulus griseus GN=I79_006513 PE=3 SV=1 - [G3H817_CRIGR]	28.69	0.0252	1	1	1	1	318	35.5	7.83
G3ILW1	Calpain-1 catalytic subunit OS=Cricetulus griseus GN=I79_024883 PE=4 SV=1 - [G3ILW1_CRIGR]	25.18	0.0108	1	1	1	1	740	84.3	5.95
G3I4J5	Nicotinate-nucleotide pyrophosphorylase [carboxylating] OS=Cricetulus griseus GN=I79_018375 PE=4 SV=1 - [G3I4J5_CRIGR]	21.75	0.0546	1	1	1	1	183	19	7.11
G3HTV2	WW domain-binding protein 2 OS=Cricetulus griseus GN=I79_014332 PE=4 SV=1 - [G3HTV2_CRIGR]	31.33	0.0383	1	1	1	1	261	28	6.33
G3I4Z0	Signal transducing adapter molecule 2 OS=Cricetulus griseus GN=I79_018531 PE=4 SV=1 - [G3I4Z0_CRIGR]	0	0.0172	1	1	1	1	523	57.5	5.15
Q3T0L5	Epithelial cell adhesion molecule OS=Bos taurus GN=EPCAM PE=2 SV=1 - [EPCAM_BOVIN]	37.18	0.0287	1	1	1	1	314	34.8	6.18
G3GRV0	Kelch domain-containing protein 4 OS=Cricetulus griseus GN=I79_000244 PE=4 SV=1 - [G3GRV0_CRIGR]	20.43	0.017	1	1	1	1	589	65.6	5.48
G3H297	Coiled-coil domain-containing protein 63 OS=Cricetulus griseus GN=I79_004268 PE=4 SV=1 - [G3H297_CRIGR]	0	0.0187	1	1	1	1	481	55.7	6.7
G3GZ50	Zinc phosphodiesterase ELAC protein 2 OS=Cricetulus griseus GN=I79_003102 PE=4 SV=1 - [G3GZ50_CRIGR]	24.18	0.0894	1	1	1	1	123	14	5.3
Q2T9W6	Leucine-rich repeat flightless-interacting protein 2 OS=Bos taurus GN=LRRFIP2 PE=2 SV=1 - [LRRF2_BOVIN]	42.01	0.03	3	1	1	1	400	45.5	5.39
G3IPB8	SWI/SNF-related matrix-associated actin-dependent regulator chromatin subfamily E member 1 (Fragment) OS=Cricetulus griseus GN=I79_025824 PE=4 SV=1 - [G3IPB8_CRIGR]	25.26	0.0833	1	1	1	1	144	16.5	5.43
G3HVZ6	Small nuclear ribonucleoprotein G OS=Cricetulus griseus GN=I79_015143 PE=4 SV=1 - [G3HVZ6_CRIGR]	37.7	0.1711	3	1	1	1	76	8.5	8.21
G3HGM6	N(4)-(Beta-N-acetylglucosaminyl)-L-asparaginase OS=Cricetulus griseus GN=I79_009764 PE=4 SV=1 - [G3HGM6_CRIGR]	43.89	0.0347	1	1	1	1	346	37.2	7.46
G3HKQ7	Microtubule-associated protein OS=Cricetulus griseus GN=I79_011286 PE=3 SV=1 - [G3HKQ7_CRIGR]	0	0.0123	1	1	1	1	1300	138.1	5.1
G3H7J9	60S ribosomal protein L31 OS=Cricetulus griseus GN=I79_006331 PE=4 SV=1 - [G3H7J9_CRIGR]	43.66	0.112	4	1	1	1	125	14.3	9.99
P68265	Glycolipid transfer protein OS=Bos taurus GN=GLTP PE=1 SV=2 - [GLTP_BOVIN]	22.51	0.0718	1	1	1	1	209	23.9	7.85
G3HYB2	Sepiapterin reductase OS=Cricetulus griseus GN=I79_016036 PE=4 SV=1 - [G3HYB2_CRIGR]	22.78	0.0687	1	1	1	1	262	28.1	6.06
G3GX02	Translin-associated protein X OS=Cricetulus griseus GN=I79_002289 PE=4 SV=1 - [G3GX02_CRIGR]	49.01	0.0667	1	1	1	1	285	31.9	5.44
Q9Z2J2	Apurinic/apyrimidinic endonuclease OS=Cricetulus griseus GN=APE PE=4 SV=1 - [Q9Z2J2_CRIGR]	26.28	0.0631	1	1	1	1	317	35.5	8.37
G3H170	Drebrin OS=Cricetulus griseus GN=I79_003894 PE=4 SV=1 - [G3H170_CRIGR]	23.51	0.0352	1	1	1	1	597	65.3	4.48
G3HW54	Protein OS-9 OS=Cricetulus griseus GN=I79_015202 PE=4 SV=1 - [G3HW54_CRIGR]	28.68	0.0329	1	1	1	1	669	75.9	4.84
G3HAN5	Eukaryotic translation initiation factor 2 subunit 2 OS=Cricetulus griseus GN=I79_007491 PE=4 SV=1 - [G3HAN5_CRIGR]	47.3	0.0661	2	1	1	1	333	38.2	5.8
