# Supplementary material for: Identification of dissociation factors in pancreatic Cancer using a mass spectrometry-based proteomic approach
Source: Springer Nature journal article supplement (doi:10.1186/s12885-020-6522-3), 2020-01-20
Supplement: MOESM3 [file 12885_2020_6522_MOESM3_ESM.xls]

## Sheet: Sheet1
Organism	UniProtKB	Gene
sp	P83337	OFUT1
sp	Q9ES44	S20A2
sp	Q9WV24	B2MG
sp	Q8K3H7	CALR
sp	P20944	CD44
sp	Q60438	CREL2
sp	Q2QDE6	DNSL1
sp	O55058	FBLN4
sp	Q924L9	FOLC
sp	P09340	GROA
sp	Q9Z1E9	GSLG1
sp	Q60432	HYOU1
sp	P49129	LAMP1
sp	P49130	LAMP2
sp	P35950	LDLR
sp	P58755	LY96
sp	Q9Z2A8	MBTP1
sp	Q6DQX6	NDUBB
sp	Q9Z302	OXDA
sp	Q8R4U2	PDIA1
sp	A2V7M9	PGAP3
sp	Q8CHJ0	PIGU
sp	Q60506	PRIO
sp	Q8HDG8	RARR2
sp	O08595	SC22B
sp	P47951	SDC1
sp	Q64690	SIA8D
sp	Q9R1F8	TLR2
sp	Q9WV82	TLR4
sp	P49020	TMED2
sp	Q7TQN2	TX101
tr	G3HVT4	G3HVT4
tr	G3I024	G3I024
tr	G3I5A7	G3I5A7
tr	G3HQS3	G3HQS3
tr	G3ILI8	G3ILI8
tr	Q27PQ5	Q27PQ5
tr	G3IC73	G3IC73
tr	G3ICR6	G3ICR6
tr	G3I7D1	G3I7D1
tr	G3HN27	G3HN27
tr	G3I0A8	G3I0A8
tr	G3HI52	G3HI52
tr	G3H177	G3H177
tr	G3GV63	G3GV63
tr	G3I680	G3I680
tr	G3IFP1	G3IFP1
tr	G3I2U2	G3I2U2
tr	G3H2S3	G3H2S3
tr	G3ILT5	G3ILT5
tr	G3IJU1	G3IJU1
tr	G3I107	G3I107
tr	G3HCX3	G3HCX3
tr	G3GR70	G3GR70
tr	G3HVA1	G3HVA1
tr	G3HW62	G3HW62
tr	G3I7Y3	G3I7Y3
tr	G3GS65	G3GS65
tr	G3H190	G3H190
tr	G3HZA5	G3HZA5
tr	G3INL3	G3INL3
tr	G3H2W6	G3H2W6
tr	Q2L4T9	Q2L4T9
tr	G3HXX7	G3HXX7
tr	Q9EPP7	Q9EPP7
tr	G3HDH8	G3HDH8
tr	G3IDN6	G3IDN6
tr	G3I4J3	G3I4J3
tr	G3H3P8	G3H3P8
tr	G3HW54	G3HW54
tr	A4URF0	A4URF0
tr	G3HBA8	G3HBA8
tr	G3HU31	G3HU31
tr	Q2L4U0	Q2L4U0
tr	G3HRZ2	G3HRZ2
tr	G3HDN7	G3HDN7
tr	G3GZ52	G3GZ52
tr	G3H3N7	G3H3N7
tr	G3H2V2	G3H2V2
tr	G3H991	G3H991
tr	G3HPX7	G3HPX7
tr	G3IAD5	G3IAD5
tr	G3HI98	G3HI98
tr	G3H284	G3H284
tr	G3HNC5	G3HNC5
tr	G3GZU8	G3GZU8
tr	G3GUV3	G3GUV3
tr	G3HH90	G3HH90
tr	G3GRY4	G3GRY4
tr	G3HQY3	G3HQY3
tr	G3HU98	G3HU98
tr	G3HPJ2	G3HPJ2
tr	G3HYG6	G3HYG6
tr	G3HUA1	G3HUA1
tr	G3HZG0	G3HZG0
tr	G3HCA7	G3HCA7
tr	G3IBH0	G3IBH0
tr	G3HF75	G3HF75
tr	G3H976	G3H976
tr	G3IKD7	G3IKD7
tr	G3I664	G3I664
tr	G3IJ28	G3IJ28
tr	G3II38	G3II38
tr	G3I5U7	G3I5U7
tr	Q60426	Q60426
tr	G3HVN9	G3HVN9
tr	G3GZS7	G3GZS7
tr	G3HF74	G3HF74
tr	G3IHR6	G3IHR6
tr	G3GTA9	G3GTA9
tr	G3H5J8	G3H5J8
tr	Q9ERF7	Q9ERF7
tr	G3HQN7	G3HQN7
tr	G3GTC0	G3GTC0
tr	G3I4W7	G3I4W7
tr	G3HJG3	G3HJG3
tr	G3HYL8	G3HYL8
tr	G3H2I4	G3H2I4
tr	G3HTY7	G3HTY7
tr	G3ID97	G3ID97
tr	G3HIA8	G3HIA8
tr	G3I3G1	G3I3G1
tr	G3I1R8	G3I1R8
tr	G3HXI8	G3HXI8
tr	G3HD07	G3HD07
tr	G3I028	G3I028
tr	G3I1L3	G3I1L3
tr	G3I4M9	G3I4M9
tr	G3HCV4	G3HCV4
tr	G3GYG7	G3GYG7
tr	G3H6G0	G3H6G0
tr	G3HB91	G3HB91
tr	G3HTL8	G3HTL8
tr	G3HY37	G3HY37
tr	G3H4C7	G3H4C7
tr	G3HP49	G3HP49
tr	G3HYU2	G3HYU2
tr	G3IAP3	G3IAP3
tr	G3HNK8	G3HNK8
tr	G3HUN9	G3HUN9
tr	G3HUR5	G3HUR5
tr	G3HUW1	G3HUW1
tr	G3HUS8	G3HUS8
tr	G3IDW1	G3IDW1
tr	G3IDW3	G3IDW3
tr	G3I7M9	G3I7M9
tr	G3I7F0	G3I7F0
tr	G3IE67	G3IE67
tr	G3I7H3	G3I7H3
tr	G3IKB7	G3IKB7
tr	G3HP39	G3HP39
tr	G3IE82	G3IE82
tr	G3HP27	G3HP27
tr	G3I1H5	G3I1H5
tr	G3I1N0	G3I1N0
tr	G3IEM1	G3IEM1
tr	G3HPC3	G3HPC3
tr	G3I8L1	G3I8L1
tr	G3HPM2	G3HPM2
tr	G3HPT9	G3HPT9
tr	G3HW16	G3HW16
tr	G3HW40	G3HW40
tr	G3I8N7	G3I8N7
tr	G3IL94	G3IL94
tr	G3IFB9	G3IFB9
tr	G3HQ84	G3HQ84
tr	G3ILB1	G3ILB1
tr	G3HQD5	G3HQD5
tr	G3HWR1	G3HWR1
tr	G3HWE1	G3HWE1
tr	G3I2M0	G3I2M0
tr	G3I2T2	G3I2T2
tr	G3I917	G3I917
tr	G3I973	G3I973
tr	G3I953	G3I953
tr	G3IFU9	G3IFU9
tr	G3HQK4	G3HQK4
tr	G3HXA6	G3HXA6
tr	G3I3B2	G3I3B2
tr	G3I3K5	G3I3K5
tr	G3I9N2	G3I9N2
tr	G3I3B1	G3I3B1
tr	G3IFY6	G3IFY6
tr	G3IA78	G3IA78
tr	G3IG77	G3IG77
tr	G3IMI5	G3IMI5
tr	G3IMN1	G3IMN1
tr	G3I3T0	G3I3T0
tr	G3I3X8	G3I3X8
tr	G3IAK4	G3IAK4
tr	G3IAL8	G3IAL8
tr	G3IGH5	G3IGH5
tr	G3I401	G3I401
tr	G3IGP3	G3IGP3
tr	G3IH29	G3IH29
tr	G3IN71	G3IN71
tr	G3GUR2	G3GUR2
tr	G3GUM0	G3GUM0
tr	G3HIP8	G3HIP8
tr	G3GWZ1	G3GWZ1
tr	G3HAD5	G3HAD5
tr	G3HAC9	G3HAC9
tr	G3H0R8	G3H0R8
tr	G3GZR5	G3GZR5
tr	G3HB61	G3HB61
tr	G3GU11	G3GU11
tr	G3H2M5	G3H2M5
tr	G3H2L2	G3H2L2
tr	G3H4S3	G3H4S3
tr	G3HB74	G3HB74
tr	G3HBC6	G3HBC6
tr	G3HBB0	G3HBB0
tr	G3GU40	G3GU40
tr	G3GY04	G3GY04
tr	G3GXV0	G3GXV0
tr	G3GY26	G3GY26
tr	G3H584	G3H584
tr	G3H100	G3H100
tr	G3H1W4	G3H1W4
tr	G3H2G3	G3H2G3
tr	G3H499	G3H499
tr	G3H3F3	G3H3F3
tr	G3H697	G3H697
tr	G3H6C3	G3H6C3
tr	G3H6J4	G3H6J4
tr	G3H6S0	G3H6S0
tr	G3H6G2	G3H6G2
tr	G3H7W9	G3H7W9
tr	G3HHZ1	G3HHZ1
tr	G3H7X2	G3H7X2
tr	A0A061I843	A0A061I843
tr	A0A061IDH6	A0A061IDH6
tr	A0A061I512	A0A061I512
tr	A0A061IIT7	A0A061IIT7
tr	A0A061IHG3	A0A061IHG3
tr	A0A061IIW7	A0A061IIW7
tr	A0A061IGP1	A0A061IGP1
tr	A0A061IHY9	A0A061IHY9
tr	A0A061IKF0	A0A061IKF0
tr	A0A061I528	A0A061I528
tr	A0A061IIC8	A0A061IIC8
tr	A0A061I7N8	A0A061I7N8
tr	A0A061I890	A0A061I890
tr	A0A061IQT2	A0A061IQT2
tr	A0A061IPZ6	A0A061IPZ6
tr	A0A061IAA7	A0A061IAA7
tr	A0A061IRD0	A0A061IRD0
tr	A0A061IBP2	A0A061IBP2
tr	A0A061ICJ6	A0A061ICJ6
tr	A0A061IQL5	A0A061IQL5
tr	A0A061IDK8	A0A061IDK8
tr	A0A061ICE0	A0A061ICE0
tr	A0A061IFE6	A0A061IFE6
tr	A0A061IFP5	A0A061IFP5
tr	A0A061IGF7	A0A061IGF7
tr	A0A061IHA8	A0A061IHA8
tr	A0A061IGI6	A0A061IGI6
tr	A0A061IHA1	A0A061IHA1
tr	A0A061IHX0	A0A061IHX0
tr	A0A061IJ91	A0A061IJ91
tr	A0A061IIS6	A0A061IIS6
tr	A0A061IKQ4	A0A061IKQ4
tr	A0A061HUJ7	A0A061HUJ7
tr	A0A061HUU2	A0A061HUU2
tr	A0A061HV26	A0A061HV26
tr	A0A061IM82	A0A061IM82
tr	A0A061IKG5	A0A061IKG5
tr	A0A061IMB6	A0A061IMB6
tr	A0A061IP47	A0A061IP47
tr	A0A061IMI0	A0A061IMI0
tr	A0A061IPM9	A0A061IPM9
tr	A0A061HZA0	A0A061HZA0
tr	A0A061HYS4	A0A061HYS4
tr	A0A061I0P8	A0A061I0P8
tr	A0A061HZV9	A0A061HZV9
tr	A0A061I0Q9	A0A061I0Q9
tr	A0A061I0W0	A0A061I0W0
tr	A0A061ILH6	A0A061ILH6
tr	A0A061I0Z7	A0A061I0Z7
tr	A0A061I141	A0A061I141
tr	A0A061I357	A0A061I357
tr	A0A061IMB0	A0A061IMB0
tr	A0A061IMJ0	A0A061IMJ0
tr	A0A061I6Q8	A0A061I6Q8
tr	A0A061I7P0	A0A061I7P0
tr	A0A061IBM7	A0A061IBM7
tr	A0A061IBM9	A0A061IBM9
tr	A0A061ICY3	A0A061ICY3
tr	A0A061IEQ3	A0A061IEQ3
tr	A0A061HTB3	A0A061HTB3
tr	A0A061IFB1	A0A061IFB1
tr	A0A061IGB1	A0A061IGB1
tr	A0A061IHH5	A0A061IHH5
tr	A0A061HXN5	A0A061HXN5
tr	A0A061I3K8	A0A061I3K8
tr	A0A061IHJ2	A0A061IHJ2
tr	A0A061I734	A0A061I734
tr	A0A061I899	A0A061I899
tr	A0A061IQ72	A0A061IQ72
tr	A0A061HTH6	A0A061HTH6
tr	A0A061IKB2	A0A061IKB2
tr	A0A061IKH9	A0A061IKH9
tr	A0A061ILP0	A0A061ILP0
tr	A0A061IN68	A0A061IN68
tr	A0A061INB5	A0A061INB5
tr	A0A061INZ6	A0A061INZ6
tr	A0A061IPB4	A0A061IPB4
tr	A0A061IPI0	A0A061IPI0
tr	A0A061IPE5	A0A061IPE5
tr	A0A061IPN3	A0A061IPN3
tr	A0A061I1H5	A0A061I1H5
tr	A0A061I2S4	A0A061I2S4
tr	A0A061I4N9	A0A061I4N9
tr	A0A061I5Z7	A0A061I5Z7
tr	A0A061IK56	A0A061IK56
tr	A0A061IMQ7	A0A061IMQ7
tr	A0A061I8D5	A0A061I8D5
tr	A0A061INF2	A0A061INF2
tr	A0A061I994	A0A061I994
tr	A0A061I4V4	A0A061I4V4
tr	A0A061ILW4	A0A061ILW4
tr	A0A061IDX2	A0A061IDX2
tr	A0A061IRE8	A0A061IRE8
tr	A0A061I7R2	A0A061I7R2
tr	A0A061IJB2	A0A061IJB2
tr	A0A061IDK6	A0A061IDK6
tr	C9VZQ5	C9VZQ5
tr	G3HMV7	G3HMV7
tr	G3HL82	G3HL82
tr	G3HRK9	G3HRK9
tr	G3I279	G3I279
tr	G3I0N3	G3I0N3
tr	G3IEC9	G3IEC9
tr	G3ID16	G3ID16
tr	G3IID2	G3IID2
tr	G3IQ48	G3IQ48
tr	G3IKB4	G3IKB4
tr	G3I984	G3I984
tr	A0A061IL49	A0A061IL49
tr	A0A061I8V8	A0A061I8V8
tr	A0A061IHD1	A0A061IHD1
tr	A0A061IHB7	A0A061IHB7
tr	A0A061HX41	A0A061HX41
tr	A0A061IP97	A0A061IP97
tr	A0A061IQP1	A0A061IQP1
tr	A0A061HUZ1	A0A061HUZ1
tr	G3HRP8	G3HRP8
tr	G3I4F3	G3I4F3
tr	G3GZF0	G3GZF0
tr	G3HLA1	G3HLA1
tr	A0A061HWQ6	A0A061HWQ6
tr	G3I6J2	G3I6J2
tr	A0A061IQG1	A0A061IQG1
tr	G3HP98	G3HP98
tr	G3I299	G3I299
tr	G3GXW2	G3GXW2
tr	G3IKG8	G3IKG8
tr	G3GZY2	G3GZY2
tr	G3GX58	G3GX58
tr	G3H8Z5	G3H8Z5
tr	G3HIL5	G3HIL5
tr	G3I3R5	G3I3R5
tr	G3IH54	G3IH54
tr	G3HLS8	G3HLS8
tr	G3HVW0	G3HVW0
tr	G3HWM3	G3HWM3
tr	G3I0H8	G3I0H8
tr	G3ICX9	G3ICX9
tr	G3ILR2	G3ILR2
tr	G3HI38	G3HI38
tr	G3H0G9	G3H0G9
tr	G3GTH6	G3GTH6
tr	G3GSQ2	G3GSQ2
tr	G3GWU1	G3GWU1
tr	G3HFL2	G3HFL2
tr	G3H2E8	G3H2E8
tr	G3H7X3	G3H7X3
tr	G3H7Z9	G3H7Z9
tr	G3I0H7	G3I0H7
tr	G3I8D1	G3I8D1
tr	G3IE70	G3IE70
tr	G3HBN6	G3HBN6
tr	G3IJF6	G3IJF6
tr	G3IK96	G3IK96
tr	G3HQ75	G3HQ75
tr	G3ILR5	G3ILR5
tr	G3HPZ7	G3HPZ7
tr	G3HBE7	G3HBE7
tr	G3HB75	G3HB75
tr	G3H992	G3H992
tr	G3HPC9	G3HPC9
tr	G3IGU6	G3IGU6
tr	G3HUV4	G3HUV4
tr	G3I0U6	G3I0U6
tr	G3HZ28	G3HZ28
tr	G3I1S8	G3I1S8
tr	G3I641	G3I641
tr	G3HS65	G3HS65
tr	G3GYC0	G3GYC0
tr	G3GX90	G3GX90
tr	G3H5Y0	G3H5Y0
tr	G3H6D2	G3H6D2
tr	G3I9Z6	G3I9Z6
tr	G3IHT1	G3IHT1
tr	G3GZY4	G3GZY4
tr	G3GWB3	G3GWB3
tr	G3HJM0	G3HJM0
tr	G3HTA9	G3HTA9
tr	G3H9T1	G3H9T1
tr	G3H9W4	G3H9W4
tr	G3HX44	G3HX44
tr	G3IF90	G3IF90
tr	G3IF62	G3IF62
tr	G3GXI2	G3GXI2
tr	G3IJ89	G3IJ89
tr	G3HBC1	G3HBC1
tr	G3HCB9	G3HCB9
tr	G3HKV9	G3HKV9
tr	G3I0F7	G3I0F7
tr	G3I2P2	G3I2P2
tr	G3HZD1	G3HZD1
tr	G3I8P3	G3I8P3
tr	G3IA20	G3IA20
tr	G3I0I1	G3I0I1
tr	G3IIX3	G3IIX3
tr	G3ILN2	G3ILN2
tr	G3HA04	G3HA04
tr	G3HDC0	G3HDC0
tr	G3HGI5	G3HGI5
tr	G3HGV8	G3HGV8
tr	G3HGY7	G3HGY7
tr	G3HHV9	G3HHV9
tr	G3H652	G3H652
tr	A0A061HUZ6	A0A061HUZ6
tr	G3H1Q4	G3H1Q4
tr	G3H1W0	G3H1W0
tr	A0A061IEJ2	A0A061IEJ2
tr	A0A061ID77	A0A061ID77
tr	A0A061HV21	A0A061HV21
tr	A0A061I738	A0A061I738
tr	A0A061I9G9	A0A061I9G9
tr	A0A061IDI1	A0A061IDI1
tr	A0A061ICR7	A0A061ICR7
tr	A0A061ILY4	A0A061ILY4
tr	A0A061I7V2	A0A061I7V2
tr	A0A061IKK6	A0A061IKK6
tr	A0A061IFS3	A0A061IFS3
tr	A0A061IMW5	A0A061IMW5
tr	Q8K3H8	Q8K3H8
tr	Q6W3F6	Q6W3F6
tr	G3HK39	G3HK39
tr	G3IIB1	G3IIB1
tr	G3HV36	G3HV36
tr	G3I6X9	G3I6X9
tr	G3IEF9	G3IEF9
tr	A0A061HYU9	A0A061HYU9
tr	A0A061I4Q2	A0A061I4Q2
tr	A0A061II69	A0A061II69
tr	A0A061IJZ2	A0A061IJZ2
tr	A0A061HTV1	A0A061HTV1
tr	A0A061INM6	A0A061INM6
tr	A0A061HY36	A0A061HY36
tr	A0A061IFY7	A0A061IFY7
tr	A0A061HZH1	A0A061HZH1
tr	A0A061I123	A0A061I123
tr	A0A061ID98	A0A061ID98
tr	A0A061IMT3	A0A061IMT3
tr	A0A061IC58	A0A061IC58
tr	A0A061IMC6	A0A061IMC6
tr	Q6R4A6	Q6R4A6
tr	A0A061I7D6	A0A061I7D6
tr	A0A061IF92	A0A061IF92
tr	A0A061INB9	A0A061INB9
tr	A0A061IPV1	A0A061IPV1
tr	A0A061IKS4	A0A061IKS4
tr	G3IHG4	G3IHG4
tr	G3H0S3	G3H0S3
tr	G3HCH0	G3HCH0
tr	G3HP65	G3HP65
tr	G3H0T2	G3H0T2
tr	G3HJL6	G3HJL6
tr	G3ID07	G3ID07
tr	G3IIS0	G3IIS0
tr	G3GW25	G3GW25
tr	G3HJB9	G3HJB9
tr	A0A061I151	A0A061I151
tr	A0A061IIP5	A0A061IIP5
tr	A0A061IL27	A0A061IL27
tr	A0A061IR56	A0A061IR56
tr	A0A061I8W9	A0A061I8W9
tr	A0A061HZS5	A0A061HZS5
tr	A0A061I971	A0A061I971
tr	A0A061I9Y8	A0A061I9Y8
tr	G3HMC9	G3HMC9
tr	G3HS37	G3HS37
tr	G3HKG5	G3HKG5
tr	G3I0M8	G3I0M8
tr	G3IIU2	G3IIU2
tr	G3IHQ3	G3IHQ3
tr	G3GYN8	G3GYN8
tr	G3H0P8	G3H0P8
tr	G3HID4	G3HID4
tr	G3IGX5	G3IGX5
tr	G3HF34	G3HF34
tr	G3I9B4	G3I9B4
tr	A0A061IB46	A0A061IB46
tr	A0A061IA74	A0A061IA74
tr	A0A061I8H7	A0A061I8H7
tr	A0A061IJV7	A0A061IJV7
tr	A0A061HY22	A0A061HY22
tr	A0A061IF25	A0A061IF25
tr	A0A061IQ53	A0A061IQ53
tr	A0A061IPS6	A0A061IPS6
tr	A0A061I7E3	A0A061I7E3
tr	A0A061IBM5	A0A061IBM5
tr	A0A061I9X9	A0A061I9X9
tr	A0A061IPQ3	A0A061IPQ3
tr	A0A061IK35	A0A061IK35
tr	A0A061IG87	A0A061IG87
tr	G3IBL1	G3IBL1
tr	G3HKS1	G3HKS1
tr	G3GYH5	G3GYH5
tr	G3IC78	G3IC78
tr	G3HN04	G3HN04
tr	G3HPL4	G3HPL4
tr	G3HV07	G3HV07
tr	G3I1R3	G3I1R3
tr	G3I955	G3I955
tr	G3I8W1	G3I8W1
tr	G3ID79	G3ID79
tr	G3IIX7	G3IIX7
tr	G3HHZ4	G3HHZ4
tr	G3H3Y5	G3H3Y5
tr	G3IQ61	G3IQ61
tr	G3IN98	G3IN98
tr	G3H7E8	G3H7E8
tr	G3IF16	G3IF16
tr	G3HFS5	G3HFS5
tr	G3HFG6	G3HFG6
tr	A0A061IN46	A0A061IN46
tr	A0A061HZ09	A0A061HZ09
tr	A0A061IPH2	A0A061IPH2
tr	A0A061IAS1	A0A061IAS1
tr	A0A061IAM3	A0A061IAM3
tr	A0A061IQX0	A0A061IQX0
tr	A0A061I9T1	A0A061I9T1
tr	A0A061IEG0	A0A061IEG0
tr	A0A061IDU9	A0A061IDU9
tr	A0A061IE68	A0A061IE68
tr	A0A061IL26	A0A061IL26
tr	A0A061I3Q7	A0A061I3Q7
tr	A0A061IES0	A0A061IES0
tr	A0A061IMJ8	A0A061IMJ8
tr	G3HWG4	G3HWG4
tr	G3I3X0	G3I3X0
tr	G3IHI6	G3IHI6
tr	G3GT45	G3GT45
tr	G3GX32	G3GX32
tr	G3H028	G3H028
tr	G3H9D4	G3H9D4
tr	G3HBB8	G3HBB8
tr	G3HCG5	G3HCG5
tr	G3HD34	G3HD34
tr	G3H217	G3H217
tr	G3HLK5	G3HLK5
tr	G3I4S5	G3I4S5
tr	G3IIT4	G3IIT4
tr	G3HQ29	G3HQ29
tr	G3HNR4	G3HNR4
tr	G3I439	G3I439
tr	G3IEL1	G3IEL1
tr	G3HTH5	G3HTH5
tr	G3HX58	G3HX58
tr	G3I857	G3I857
tr	G3H3E2	G3H3E2
tr	G3H4Q3	G3H4Q3
tr	G3HB01	G3HB01
tr	G3HPK8	G3HPK8
tr	G3HQN8	G3HQN8
tr	G3HWV5	G3HWV5
tr	G3I192	G3I192
tr	A0A061IQR2	A0A061IQR2
tr	A0A061IDQ4	A0A061IDQ4
tr	A0A061IH65	A0A061IH65
tr	A0A061I819	A0A061I819
tr	A0A061IPE0	A0A061IPE0
tr	A0A061IJG2	A0A061IJG2
tr	A0A061IFN1	A0A061IFN1
tr	G3HK90	G3HK90
tr	A0A061IPW8	A0A061IPW8
tr	A0A061I905	A0A061I905
tr	A0A061IN70	A0A061IN70
tr	G3I4F2	G3I4F2
tr	G3GVF0	G3GVF0
tr	G3GUN2	G3GUN2
tr	G3H2M8	G3H2M8
tr	G3HC50	G3HC50
tr	G3HCJ0	G3HCJ0
tr	G3HQ55	G3HQ55
tr	G3HGT0	G3HGT0
tr	G3HVL2	G3HVL2
tr	G3IM12	G3IM12
tr	G3IAJ9	G3IAJ9
tr	A0A061HWW8	A0A061HWW8
tr	A0A061ICC0	A0A061ICC0
tr	G3HEI9	G3HEI9
tr	A0A061IEG6	A0A061IEG6
tr	A0A061IF52	A0A061IF52
tr	A0A061HYA5	A0A061HYA5
tr	A0A061II85	A0A061II85
tr	A0A061IJ75	A0A061IJ75
tr	A0A061HWF8	A0A061HWF8
tr	A0A061III4	A0A061III4
tr	A0A061HXK3	A0A061HXK3
tr	A0A061I523	A0A061I523
tr	A0A061IHR7	A0A061IHR7
tr	A0A061IH93	A0A061IH93
tr	A0A061IHN2	A0A061IHN2
tr	Q60449	Q60449
tr	A0A061I8A1	A0A061I8A1
tr	A0A061IH84	A0A061IH84
tr	A0A061IQC2	A0A061IQC2
tr	G3HQH7	G3HQH7
tr	G3HS85	G3HS85
tr	G3HVX3	G3HVX3
tr	G3I7X7	G3I7X7
tr	G3I3P4	G3I3P4
tr	G3IDE3	G3IDE3
tr	G3IIG6	G3IIG6
tr	G3IML4	G3IML4
tr	G3IHD6	G3IHD6
tr	G3H759	G3H759
tr	G3IMJ3	G3IMJ3
tr	G3HIQ4	G3HIQ4
tr	Q99PG1	Q99PG1
tr	A0A061I2K0	A0A061I2K0
tr	A0A061HZZ5	A0A061HZZ5
tr	G3HG91	G3HG91
tr	A0A061IQU1	A0A061IQU1
tr	A0A061HWZ2	A0A061HWZ2
tr	A0A061I0T8	A0A061I0T8
tr	G3HXT7	G3HXT7
tr	G3I5R4	G3I5R4
tr	G3HH60	G3HH60
tr	G3HBI1	G3HBI1
tr	G3HQS2	G3HQS2
tr	G3IKR7	G3IKR7
tr	G3I0H6	G3I0H6
tr	G3H2G8	G3H2G8
tr	G3H3E4	G3H3E4
tr	G3HF89	G3HF89
tr	G3HHQ2	G3HHQ2
tr	A0A061I635	A0A061I635
tr	A0A061IBH0	A0A061IBH0
tr	A0A061IAR2	A0A061IAR2
tr	A0A061IJH2	A0A061IJH2
tr	G3HRF8	G3HRF8
tr	G3IH84	G3IH84
tr	G3IBP7	G3IBP7
tr	G3HRP0	G3HRP0
tr	G3H796	G3H796
tr	G3HMI4	G3HMI4
tr	G3HJL5	G3HJL5
tr	G3GSF1	G3GSF1
tr	Q7TSW9	Q7TSW9
tr	G3INE1	G3INE1
tr	G3H172	G3H172
tr	G3IQ85	G3IQ85
tr	G3GTV3	G3GTV3
tr	G3H4L3	G3H4L3
tr	G3HLP9	G3HLP9
tr	G3H416	G3H416
tr	G3I560	G3I560
tr	G3GVI1	G3GVI1
tr	G3H887	G3H887
tr	G3HBX0	G3HBX0
tr	G3HQN1	G3HQN1
tr	G3I6S2	G3I6S2
tr	G3IEC4	G3IEC4
tr	G3IJ81	G3IJ81
tr	G3IL44	G3IL44
tr	G3GS88	G3GS88
tr	A0A061IIJ7	A0A061IIJ7
tr	A0A061IKI2	A0A061IKI2
tr	A0A061IQN7	A0A061IQN7
tr	A0A061I0K7	A0A061I0K7
tr	A0A061IFQ6	A0A061IFQ6
tr	A0A061HXX5	A0A061HXX5
tr	A0A061HTA7	A0A061HTA7
tr	A0A061IJG5	A0A061IJG5
tr	A0A061I2W7	A0A061I2W7
tr	G3HK52	G3HK52
tr	G3HRR3	G3HRR3
tr	G3HS92	G3HS92
tr	G3I555	G3I555
tr	G3IHZ0	G3IHZ0
tr	G3II04	G3II04
tr	G3GW90	G3GW90
tr	G3HI25	G3HI25
tr	G3GRX1	G3GRX1
tr	G3HJD0	G3HJD0
tr	G3I3P1	G3I3P1
tr	G3H0E9	G3H0E9
tr	G3H5X9	G3H5X9
tr	G3IEX9	G3IEX9
tr	G3HY84	G3HY84
tr	A0A061IJC9	A0A061IJC9
tr	A0A061I5B5	A0A061I5B5
tr	A0A061I7V7	A0A061I7V7
tr	A0A061HU01	A0A061HU01
tr	A0A061HX15	A0A061HX15
tr	A0A061I2U6	A0A061I2U6
tr	A0A061ILW6	A0A061ILW6
tr	A0A061INU8	A0A061INU8
tr	A0A061IMM8	A0A061IMM8
tr	A0A061IFU5	A0A061IFU5
tr	A0A061IR16	A0A061IR16
tr	A0A061HV08	A0A061HV08
tr	A0A061IGW5	A0A061IGW5
tr	A0A061IKA1	A0A061IKA1
tr	A0A061HWT7	A0A061HWT7
tr	A0A061IKU1	A0A061IKU1
tr	A0A061I2M2	A0A061I2M2
tr	A0A061IFS5	A0A061IFS5
tr	G3H0Q3	G3H0Q3
tr	G3GUX8	G3GUX8
tr	G3HH52	G3HH52
tr	G3HQ12	G3HQ12
tr	G3I443	G3I443
tr	G3I7D4	G3I7D4
tr	G3I7P8	G3I7P8
tr	A0A061HU13	A0A061HU13
tr	A0A061HUM6	A0A061HUM6
tr	A0A061I979	A0A061I979
tr	G3HMB0	G3HMB0
tr	A0A061IQU3	A0A061IQU3
tr	A0A061I4F7	A0A061I4F7
tr	A0A061II46	A0A061II46
tr	A0A061IJJ7	A0A061IJJ7
tr	G3I4S0	G3I4S0
tr	G3I6J3	G3I6J3
tr	A0A061I0I7	A0A061I0I7
tr	G3IKK1	G3IKK1
tr	A0A061IKA6	A0A061IKA6
tr	G3HS84	G3HS84
tr	G3GZ31	G3GZ31
tr	G3IFA6	G3IFA6
tr	G3GTW8	G3GTW8
tr	G3HBN0	G3HBN0
tr	G3HHR6	G3HHR6
tr	G3HC49	G3HC49
tr	G3HGU9	G3HGU9
tr	G3H8Z6	G3H8Z6
tr	G3H705	G3H705
tr	A0A061I0N4	A0A061I0N4
tr	A0A061HV42	A0A061HV42
tr	A0A061HXE3	A0A061HXE3
tr	A0A061IIJ1	A0A061IIJ1
tr	G3II93	G3II93
tr	A0A061I2I4	A0A061I2I4
tr	A0A061I287	A0A061I287
tr	A0A061HWM4	A0A061HWM4
tr	A0A061ICP6	A0A061ICP6
tr	G3I5N6	G3I5N6
tr	G3IAS3	G3IAS3
tr	A0A061IG34	A0A061IG34
tr	A0A061I785	A0A061I785
tr	G3GV47	G3GV47
tr	G3INL2	G3INL2
tr	G3IPH1	G3IPH1
tr	G3HE80	G3HE80
tr	G3HT85	G3HT85
tr	G3IGR4	G3IGR4
tr	G3H1F9	G3H1F9
tr	G3GXS2	G3GXS2
tr	G3GTS9	G3GTS9
tr	G3IG84	G3IG84
tr	G3H508	G3H508
tr	G3IGX2	G3IGX2
tr	G3GUL7	G3GUL7
tr	G3HCU4	G3HCU4
tr	G3HU96	G3HU96
tr	G3HRR0	G3HRR0
tr	G3HCN6	G3HCN6
tr	G3I127	G3I127
tr	G3HRM3	G3HRM3
tr	G3I273	G3I273
tr	G3I3B0	G3I3B0
tr	G3H6I3	G3H6I3
tr	G3H676	G3H676
tr	G3H8P5	G3H8P5
tr	A0A061I9A3	A0A061I9A3
tr	G3IFX8	G3IFX8
tr	A0A061HTU9	A0A061HTU9
tr	A0A061I842	A0A061I842
tr	A0A061I7A6	A0A061I7A6
tr	A0A061IE36	A0A061IE36
tr	A0A061IBV4	A0A061IBV4
tr	A0A061I462	A0A061I462
tr	A0A061ILT6	A0A061ILT6
tr	A0A061IG06	A0A061IG06
tr	A0A061IMG1	A0A061IMG1
tr	A0A061IQB0	A0A061IQB0
tr	A0A061IC86	A0A061IC86
tr	A0A061IK07	A0A061IK07
tr	A0A061IJK0	A0A061IJK0
tr	A0A061IIW0	A0A061IIW0
tr	Q9R0C7	Q9R0C7
tr	A0A061INU3	A0A061INU3
tr	G3HSV7	G3HSV7
tr	G3HLZ3	G3HLZ3
tr	G3GSB5	G3GSB5
tr	G3H9Q6	G3H9Q6
tr	G3HDM5	G3HDM5
tr	G3HBL2	G3HBL2
tr	G3HGR0	G3HGR0
tr	G3HJP3	G3HJP3
tr	G3HIT5	G3HIT5
tr	G3HQJ4	G3HQJ4
tr	G3HH66	G3HH66
tr	G3H6T3	G3H6T3
tr	G3HXA9	G3HXA9
tr	G3HLB1	G3HLB1
tr	G3IG43	G3IG43
tr	G3GTE6	G3GTE6
tr	A0A061HYT7	A0A061HYT7
tr	G3IN14	G3IN14
tr	G3IIL6	G3IIL6
tr	G3HKG7	G3HKG7
tr	G3IDA8	G3IDA8
tr	A0A061IF41	A0A061IF41
tr	A0A061HZ86	A0A061HZ86
tr	A0A061IHQ3	A0A061IHQ3
tr	A0A061II68	A0A061II68
tr	A0A061I3A4	A0A061I3A4
tr	A0A061IHQ7	A0A061IHQ7
tr	A0A061II73	A0A061II73
tr	G3HMQ0	G3HMQ0
tr	G3I0I4	G3I0I4
tr	G3HZI9	G3HZI9
tr	G3HZC3	G3HZC3
tr	G3IBZ9	G3IBZ9
tr	G3H007	G3H007
tr	G3HFV5	G3HFV5
tr	G3HCA3	G3HCA3
tr	G3I208	G3I208
tr	G3HJN5	G3HJN5
tr	G3I7Q2	G3I7Q2
tr	G3I9K8	G3I9K8
tr	G3HWQ9	G3HWQ9
tr	G3HG81	G3HG81
tr	G3GVQ3	G3GVQ3
tr	G3I284	G3I284
tr	G3IMH4	G3IMH4
tr	G3I5C1	G3I5C1
tr	G3I5N8	G3I5N8
tr	G3GWB1	G3GWB1
tr	G3I913	G3I913
tr	G3H366	G3H366
tr	G3GXR3	G3GXR3
tr	G3HBC5	G3HBC5
tr	G3HGA2	G3HGA2
tr	G3HQP0	G3HQP0
tr	G3HJE1	G3HJE1
tr	G3IME7	G3IME7
tr	G3HJG6	G3HJG6
tr	G3HYH1	G3HYH1
tr	G3GVV5	G3GVV5
tr	G3I4D4	G3I4D4
tr	G3HCJ5	G3HCJ5
tr	G3HPT8	G3HPT8
tr	G3HTF0	G3HTF0
tr	G3HZZ6	G3HZZ6
tr	G3HWN2	G3HWN2
tr	G3HW24	G3HW24
tr	G3I1T0	G3I1T0
tr	G3GST4	G3GST4
tr	G3I9L7	G3I9L7
tr	G3H2I0	G3H2I0
tr	G3H0L9	G3H0L9
tr	G3HWK7	G3HWK7
tr	G3I760	G3I760
tr	G3IML1	G3IML1
tr	G3H471	G3H471
tr	G3I4T6	G3I4T6
tr	G3IC25	G3IC25
tr	G3HQR6	G3HQR6
tr	A0A061HV30	A0A061HV30
tr	G3I1H3	G3I1H3
tr	A0A061IPG3	A0A061IPG3
tr	A0A061I7Y2	A0A061I7Y2
tr	A0A061HUT6	A0A061HUT6
tr	A0A061I1C4	A0A061I1C4
tr	A0A061IIK1	A0A061IIK1
tr	A0A061I1Q5	A0A061I1Q5
tr	A0A061IP02	A0A061IP02
tr	A0A061IKS6	A0A061IKS6
tr	G3HMW9	G3HMW9
tr	G3HP50	G3HP50
tr	G3I6T1	G3I6T1
tr	A0A061IG37	A0A061IG37
tr	G3IHL9	G3IHL9
tr	G3IIB0	G3IIB0
tr	G3IP02	G3IP02
tr	G3H5U2	G3H5U2
tr	G3HG38	G3HG38
tr	G3HPY4	G3HPY4
tr	G3HVZ2	G3HVZ2
tr	G3ILH6	G3ILH6
tr	A0A061I8U9	A0A061I8U9
tr	A0A061I1S6	A0A061I1S6
tr	A0A061HWQ4	A0A061HWQ4
tr	A0A061IAT4	A0A061IAT4
tr	A0A061I947	A0A061I947
tr	G3HT64	G3HT64
tr	A0A061INK5	A0A061INK5
tr	A0A061ILL9	A0A061ILL9
tr	Q6W3F7	Q6W3F7
tr	A0A061I035	A0A061I035
tr	A0A061ICC1	A0A061ICC1
tr	A0A061I0M0	A0A061I0M0
tr	A0A061IIR7	A0A061IIR7
tr	A0A061IFB5	A0A061IFB5
tr	Q8MHC3	Q8MHC3
tr	A0A061IIR3	A0A061IIR3
tr	A0A061IAT5	A0A061IAT5
tr	A0A061INX6	A0A061INX6
tr	G3HNY3	G3HNY3
tr	G3HLU7	G3HLU7
tr	G3HLT0	G3HLT0
tr	G3HWL2	G3HWL2
tr	G3I681	G3I681
tr	G3GSU6	G3GSU6
tr	G3H4E7	G3H4E7
tr	G3GZX1	G3GZX1
tr	G3ILB8	G3ILB8
tr	G3H502	G3H502
tr	G3HB51	G3HB51
tr	G3HE26	G3HE26
tr	A0A061IL85	A0A061IL85
tr	G3I2G4	G3I2G4
tr	A0A061I7A1	A0A061I7A1
tr	A0A061IE87	A0A061IE87
tr	A0A061ILR1	A0A061ILR1
tr	A0A061I6M9	A0A061I6M9
tr	A0A061IJW5	A0A061IJW5
tr	G3HNY0	G3HNY0
tr	G3HQS7	G3HQS7
tr	G3I064	G3I064
tr	G3HQC4	G3HQC4
tr	G3I058	G3I058
tr	G3HJP7	G3HJP7
tr	G3GUK1	G3GUK1
tr	G3GZB2	G3GZB2
tr	G3HBW7	G3HBW7
tr	G3HPB9	G3HPB9
tr	G3HC02	G3HC02
tr	G3IM10	G3IM10
tr	G3HV62	G3HV62
tr	A0A061IRF7	A0A061IRF7
tr	A0A061IIX3	A0A061IIX3
tr	A0A061I3P9	A0A061I3P9
tr	G3HK37	G3HK37
tr	G3HLF7	G3HLF7
tr	Q9Z1W7	Q9Z1W7
tr	G3HSW4	G3HSW4
tr	G3HZ57	G3HZ57
tr	G3IAV7	G3IAV7
tr	G3GT76	G3GT76
tr	G3H002	G3H002
tr	G3GZL9	G3GZL9
tr	G3H476	G3H476
tr	G3H6X8	G3H6X8
tr	G3HG32	G3HG32
tr	G3HJQ4	G3HJQ4
tr	G3HM06	G3HM06
tr	G3IJ34	G3IJ34
tr	G3H3Z3	G3H3Z3
tr	G3H5G1	G3H5G1
tr	G3HB86	G3HB86
tr	G3HZE1	G3HZE1
tr	G3HV89	G3HV89
tr	G3ICK1	G3ICK1
tr	A0A061ILY5	A0A061ILY5
tr	A0A061I332	A0A061I332
tr	A0A061IQQ1	A0A061IQQ1
tr	A0A061ICQ0	A0A061ICQ0
tr	A0A061I2Z4	A0A061I2Z4
tr	A0A061IM95	A0A061IM95
tr	A0A061IR21	A0A061IR21
tr	A0A061IEI6	A0A061IEI6
tr	A0A061IBE7	A0A061IBE7
tr	A0A061IJ06	A0A061IJ06
tr	A0A061IN63	A0A061IN63
tr	A0A061IKZ7	A0A061IKZ7
tr	A0A061I382	A0A061I382
tr	A0A061HZR9	A0A061HZR9
tr	A0A061HW35	A0A061HW35
tr	A0A061IH22	A0A061IH22
tr	A0A061IR19	A0A061IR19
tr	A0A061ID78	A0A061ID78
tr	A0A061IBK1	A0A061IBK1
tr	A0A061IHB1	A0A061IHB1
tr	B8Y440	B8Y440
tr	A0A061IEX4	A0A061IEX4
tr	G3HK74	G3HK74
tr	A0A061IKD5	A0A061IKD5
tr	G3HSR8	G3HSR8
tr	G3HZC0	G3HZC0
tr	G3HYN0	G3HYN0
tr	G3HSD1	G3HSD1
tr	G3IHM7	G3IHM7
tr	G3GSJ9	G3GSJ9
tr	G3GTP7	G3GTP7
tr	G3GYW3	G3GYW3
tr	G3H226	G3H226
tr	G3H3Z2	G3H3Z2
tr	G3H0M0	G3H0M0
tr	G3HGY1	G3HGY1
tr	G3I2W2	G3I2W2
tr	G3HWG3	G3HWG3
tr	G3HVU0	G3HVU0
tr	G3IG36	G3IG36
tr	G3HPE6	G3HPE6
tr	Q8MHC2	Q8MHC2
tr	A0A061IEN3	A0A061IEN3
tr	A0A061HWV0	A0A061HWV0
tr	A0A061HTE7	A0A061HTE7
tr	A0A061I630	A0A061I630
tr	A0A061I326	A0A061I326
tr	A0A061IEN2	A0A061IEN2
tr	A0A061IC13	A0A061IC13
tr	A0A061HXN7	A0A061HXN7
tr	A0A061I5V1	A0A061I5V1
tr	G3HBE8	G3HBE8
tr	G3HPU8	G3HPU8
tr	G3HTR0	G3HTR0
tr	G3HXD7	G3HXD7
tr	G3I476	G3I476
tr	G3IF55	G3IF55
tr	G3II05	G3II05
tr	G3GTN5	G3GTN5
tr	G3HEY2	G3HEY2
tr	A0A061I5Q5	A0A061I5Q5
tr	A0A061IA08	A0A061IA08
tr	A0A061IDW8	A0A061IDW8
tr	A0A061IHP7	A0A061IHP7
tr	A0A061IKG7	A0A061IKG7
tr	A0A061ILJ6	A0A061ILJ6
tr	A0A061I0T7	A0A061I0T7
tr	A0A061IPK1	A0A061IPK1
tr	A0A061IFM1	A0A061IFM1
tr	G3HQC6	G3HQC6
tr	G3HMZ7	G3HMZ7
tr	A0A061I4I7	A0A061I4I7
tr	G3GR63	G3GR63
tr	G3IP05	G3IP05
tr	G3HE10	G3HE10
tr	G3IAF0	G3IAF0
tr	G3HKD2	G3HKD2
tr	A0A061I2T5	A0A061I2T5
tr	A0A061IKA7	A0A061IKA7
tr	A0A061HVR8	A0A061HVR8
tr	A0A061II09	A0A061II09
tr	A0A061IP46	A0A061IP46
tr	A0A061I726	A0A061I726
tr	G3HIJ6	G3HIJ6
tr	G3HW41	G3HW41
tr	Q99P57	Q99P57
tr	Q4LDX8	Q4LDX8
tr	G3HZG5	G3HZG5
tr	G3H6T7	G3H6T7
tr	G3IJS7	G3IJS7
tr	G3HGA1	G3HGA1
tr	G3I0I3	G3I0I3
tr	G3HEJ5	G3HEJ5
tr	G3HWE4	G3HWE4
tr	G3GT95	G3GT95
tr	G3HRI7	G3HRI7
tr	G3HGW6	G3HGW6
tr	G3HGT2	G3HGT2
tr	G3HBQ8	G3HBQ8
tr	G3HC93	G3HC93
tr	G3I012	G3I012
tr	G3I7N2	G3I7N2
tr	G3HV54	G3HV54
tr	G3I6Y5	G3I6Y5
tr	G3IM39	G3IM39
tr	G3I9E4	G3I9E4
tr	G3GY11	G3GY11
tr	G3H9I9	G3H9I9
tr	G3HN68	G3HN68
tr	G3ILU3	G3ILU3
tr	G3IP93	G3IP93
tr	A0A061I8K0	A0A061I8K0
tr	A0A061I3X6	A0A061I3X6
tr	A0A061IKV4	A0A061IKV4
tr	A0A061IHY1	A0A061IHY1
tr	A0A061ING0	A0A061ING0
tr	A0A061HVF1	A0A061HVF1
tr	A0A061HUG9	A0A061HUG9
tr	A0A061I824	A0A061I824
tr	A0A061IA12	A0A061IA12
tr	A0A061IAK6	A0A061IAK6
tr	A0A061I260	A0A061I260
tr	A0A061IM12	A0A061IM12
tr	A0A061IAS2	A0A061IAS2
tr	G3H469	G3H469
tr	G3I0I0	G3I0I0
tr	G3I5F9	G3I5F9
tr	G3I3E6	G3I3E6
tr	G3ILT2	G3ILT2
tr	G3IKI9	G3IKI9
tr	G3IAF8	G3IAF8
tr	G3IDC7	G3IDC7
tr	A0A061I7B9	A0A061I7B9
tr	A0A061I0J2	A0A061I0J2
tr	A0A061HTR4	A0A061HTR4
tr	A0A061IKP2	A0A061IKP2
tr	A0A061ILW0	A0A061ILW0
tr	A0A061IM14	A0A061IM14
tr	Q9WVT2	Q9WVT2
tr	A0A061IBD3	A0A061IBD3
tr	A0A061IJJ6	A0A061IJJ6
tr	A0A061IIZ6	A0A061IIZ6
tr	Q9JKJ6	Q9JKJ6
tr	A0A061IJI6	A0A061IJI6
tr	A0A061HVA6	A0A061HVA6
tr	A0A061I7F7	A0A061I7F7
tr	A0A061IN49	A0A061IN49
tr	A0A061IDV8	A0A061IDV8
tr	Q6R4A7	Q6R4A7
tr	A0A061I815	A0A061I815
tr	A0A061HUA4	A0A061HUA4
tr	A0A061HW80	A0A061HW80
tr	A0A061I412	A0A061I412
tr	A0A061I7C3	A0A061I7C3
tr	A0A061IIP2	A0A061IIP2
tr	A0A061IIY8	A0A061IIY8
tr	A0A061ILG8	A0A061ILG8
tr	A0A061HXQ1	A0A061HXQ1
tr	A0A061IPW4	A0A061IPW4
tr	A0A061I2U2	A0A061I2U2
tr	A0A061IG28	A0A061IG28
tr	A0A061I4U2	A0A061I4U2
tr	A0A061I2W9	A0A061I2W9
tr	G3IJ20	G3IJ20
tr	G3IJ25	G3IJ25
tr	G3GWV6	G3GWV6
tr	G3HC39	G3HC39
tr	G3GX77	G3GX77
tr	G3I130	G3I130
tr	G3I6I8	G3I6I8
tr	G3I8E6	G3I8E6
tr	G3IQ69	G3IQ69
tr	G3GTK5	G3GTK5
tr	A0A061INE4	A0A061INE4
tr	G3H8U4	G3H8U4
tr	A0A061IHZ4	A0A061IHZ4
tr	A0A061IBG0	A0A061IBG0
tr	A0A061IM86	A0A061IM86
tr	A0A061I7X9	A0A061I7X9
tr	A0A061IMX4	A0A061IMX4
tr	G3HRD0	G3HRD0
tr	G3I4I7	G3I4I7
tr	G3I7Q1	G3I7Q1
tr	G3ID51	G3ID51
tr	G3H754	G3H754
tr	G3IJ84	G3IJ84
tr	G3GUV4	G3GUV4
tr	G3HI97	G3HI97
tr	G3HWE7	G3HWE7
tr	G3I3J2	G3I3J2
tr	G3HG66	G3HG66
tr	G3I2U1	G3I2U1
tr	Q6QX46	Q6QX46
tr	G3ILJ7	G3ILJ7
tr	G3GSK8	G3GSK8
tr	G3H232	G3H232
tr	G3H281	G3H281
tr	A0A061I657	A0A061I657
tr	A0A061HU62	A0A061HU62
tr	A0A061HYL5	A0A061HYL5
tr	A0A061HXZ8	A0A061HXZ8
tr	A0A061IHH3	A0A061IHH3
tr	A0A061IG04	A0A061IG04
tr	G3HVY0	G3HVY0
tr	G3HJG5	G3HJG5
tr	G3HVG4	G3HVG4
tr	G3I076	G3I076
tr	G3I2X5	G3I2X5
tr	G3I0U2	G3I0U2
tr	G3IGH1	G3IGH1
tr	G3GXS4	G3GXS4
tr	G3H1K2	G3H1K2
tr	G3H332	G3H332
tr	G3GS78	G3GS78
tr	G3GZF7	G3GZF7
tr	G3GZ71	G3GZ71
tr	G3H6B1	G3H6B1
tr	G3HCU5	G3HCU5
tr	G3GYK2	G3GYK2
tr	G3HDY9	G3HDY9
tr	G3HLL2	G3HLL2
tr	G3IIT0	G3IIT0
tr	G3IPN6	G3IPN6
tr	G3H0U3	G3H0U3
tr	G3HQC5	G3HQC5
tr	G3I252	G3I252
tr	G3I3H9	G3I3H9
tr	G3I9E1	G3I9E1
tr	G3IEN2	G3IEN2
tr	G3IJ80	G3IJ80
tr	G3IJW9	G3IJW9
tr	G3IG78	G3IG78
tr	G3H0E4	G3H0E4
tr	G3GUC0	G3GUC0
tr	G3HCL9	G3HCL9
tr	G3HIJ4	G3HIJ4
tr	A0A061I0R6	A0A061I0R6
tr	A0A061HYJ4	A0A061HYJ4
tr	G3HFH4	G3HFH4
tr	A0A061IDS1	A0A061IDS1
tr	A0A061I0Z1	A0A061I0Z1
tr	A0A061I9Z9	A0A061I9Z9
tr	A0A061I3C1	A0A061I3C1
tr	A0A061HWY2	A0A061HWY2
tr	A0A061HZS7	A0A061HZS7
tr	A0A061IQ55	A0A061IQ55
tr	A0A061IQM1	A0A061IQM1
tr	A0A061IBM4	A0A061IBM4
tr	A0A061I1L9	A0A061I1L9
tr	A0A061HUY5	A0A061HUY5
tr	A0A061I1M2	A0A061I1M2
tr	A0A061IGN5	A0A061IGN5
tr	A0A061I5C0	A0A061I5C0
tr	A0A061IQP2	A0A061IQP2
tr	A0A061ILG1	A0A061ILG1
tr	A0A061IBQ1	A0A061IBQ1
tr	A0A061IIT5	A0A061IIT5
tr	G3HYG0	G3HYG0
tr	G3I8Z8	G3I8Z8
tr	G3I4R6	G3I4R6
tr	G3I6F4	G3I6F4
tr	G3HYJ3	G3HYJ3
tr	G3IKB8	G3IKB8
tr	G3HZF8	G3HZF8
tr	G3IK89	G3IK89
tr	G3GVM1	G3GVM1
tr	G3GXE2	G3GXE2
tr	G3H7A0	G3H7A0
tr	G3HDX8	G3HDX8
tr	G3IQC7	G3IQC7
tr	G3HI90	G3HI90
tr	G3HIL1	G3HIL1
tr	G3HCX1	G3HCX1
tr	G3I3P0	G3I3P0
tr	G3IF72	G3IF72
tr	G3IMJ1	G3IMJ1
tr	G3IG31	G3IG31
tr	G3IMY8	G3IMY8
tr	G3H1L5	G3H1L5
tr	A0A061IK17	A0A061IK17
tr	G3H3N0	G3H3N0
tr	A0A061I5X9	A0A061I5X9
tr	A0A061IPR7	A0A061IPR7
tr	A0A061IHZ1	A0A061IHZ1
tr	A0A061IM78	A0A061IM78
tr	G3HKR4	G3HKR4
tr	G3I8I4	G3I8I4
tr	G3GUR0	G3GUR0
tr	G3IKZ9	G3IKZ9
tr	G3HCG1	G3HCG1
tr	G3H6M6	G3H6M6
tr	G3HF49	G3HF49
tr	G3HJR0	G3HJR0
tr	G3I920	G3I920
tr	G3HDD7	G3HDD7
tr	G3IG76	G3IG76
tr	G3HSP0	G3HSP0
tr	G3HK34	G3HK34
tr	G3HZU0	G3HZU0
tr	G3I5B5	G3I5B5
tr	G3HE73	G3HE73
tr	G3HQM3	G3HQM3
tr	G3I1H2	G3I1H2
tr	G3IET7	G3IET7
tr	G3IME9	G3IME9
tr	G3GU78	G3GU78
tr	G3HSF4	G3HSF4
tr	G3HS35	G3HS35
tr	G3HY33	G3HY33
tr	G3HL18	G3HL18
tr	G3I570	G3I570
tr	G3HAX0	G3HAX0
tr	G3HT92	G3HT92
tr	G3HQX2	G3HQX2
tr	G3IIJ8	G3IIJ8
tr	G3GXV1	G3GXV1
tr	G3H7S9	G3H7S9
tr	G3HG65	G3HG65
tr	G3HE82	G3HE82
tr	G3HIK8	G3HIK8
tr	G3H5I7	G3H5I7
tr	A0A061IBF9	A0A061IBF9
tr	A0A061ILQ7	A0A061ILQ7
tr	G3H1T3	G3H1T3
tr	A0A061IGH2	A0A061IGH2
tr	A0A061IF33	A0A061IF33
tr	A0A061HTX8	A0A061HTX8
tr	G3IAV0	G3IAV0
tr	G3I5J9	G3I5J9
tr	G3HA63	G3HA63
tr	G3I251	G3I251
tr	G3I9Z1	G3I9Z1
tr	G3H1N8	G3H1N8
tr	G3GW28	G3GW28
tr	G3H2W8	G3H2W8
tr	G3H1X4	G3H1X4
tr	A0A061I3F5	A0A061I3F5
tr	A0A061I7U8	A0A061I7U8
tr	A0A061IIR5	A0A061IIR5
tr	A0A061IQD7	A0A061IQD7
tr	G3HSG3	G3HSG3
tr	G3HXY5	G3HXY5
tr	G3GRE8	G3GRE8
tr	G3GUZ9	G3GUZ9
tr	G3HXH4	G3HXH4
tr	G3HQT3	G3HQT3
tr	G3I8R9	G3I8R9
tr	G3IN86	G3IN86
tr	A0A061HV51	A0A061HV51
tr	A0A061HZM5	A0A061HZM5
tr	A0A061I739	A0A061I739
tr	A0A061IMT7	A0A061IMT7
tr	A0A061I3C7	A0A061I3C7
tr	Q6PY37	Q6PY37
tr	A0A061ID47	A0A061ID47
tr	A0A061IQT5	A0A061IQT5
tr	A0A061IJ21	A0A061IJ21
tr	A0A061I1S2	A0A061I1S2
tr	A0A061IM22	A0A061IM22
tr	G3H5B8	G3H5B8
tr	A0A061IGS2	A0A061IGS2
tr	A0A061IPZ4	A0A061IPZ4
tr	A0A061IIX7	A0A061IIX7
tr	G3H577	G3H577
tr	A0A061HZS2	A0A061HZS2
tr	A0A061I6G3	A0A061I6G3
tr	A0A061ID38	A0A061ID38
tr	A0A061IDB0	A0A061IDB0
tr	G3I4R7	G3I4R7
tr	G3HLW6	G3HLW6
tr	G3II78	G3II78
tr	G3HXG1	G3HXG1
tr	G3I0I2	G3I0I2
tr	G3IEB8	G3IEB8
tr	G3IKE8	G3IKE8
tr	G3IMS2	G3IMS2
tr	G3GZ30	G3GZ30
tr	G3HCK6	G3HCK6
tr	G3H6X9	G3H6X9
tr	A0A061IK19	A0A061IK19
tr	G3HRT4	G3HRT4
tr	G3I5A9	G3I5A9
tr	G3I4N7	G3I4N7
tr	A0A061I3F8	A0A061I3F8
tr	G3IAU4	G3IAU4
tr	G3II15	G3II15
tr	A0A061IMP9	A0A061IMP9
tr	Q9JKJ5	Q9JKJ5
tr	A0A061IDA7	A0A061IDA7
tr	Q8MHC1	Q8MHC1
tr	G3HVH3	G3HVH3
tr	G3I8B4	G3I8B4
tr	G3IDR6	G3IDR6
tr	G3INI7	G3INI7
tr	G3IG72	G3IG72
tr	G3GZA2	G3GZA2
tr	G3IMD4	G3IMD4
tr	G3H444	G3H444
tr	G3GXU7	G3GXU7
tr	G3H3F9	G3H3F9
tr	G3HJF1	G3HJF1
tr	G3HSP4	G3HSP4
tr	G3I7A5	G3I7A5
tr	G3HPQ5	G3HPQ5
tr	G3GTT2	G3GTT2
tr	G3H1D4	G3H1D4
tr	G3HAW8	G3HAW8
tr	G3HBZ6	G3HBZ6
tr	G3HAP9	G3HAP9
tr	G3HCI8	G3HCI8
tr	G3HGQ6	G3HGQ6
tr	A0A061HWC9	A0A061HWC9
tr	A0A061IJU2	A0A061IJU2
tr	G3HBC2	G3HBC2
tr	A0A061IJP4	A0A061IJP4
tr	A0A061IPV2	A0A061IPV2
tr	A0A061IDS6	A0A061IDS6
tr	A0A061IGR9	A0A061IGR9
tr	A0A061I1B7	A0A061I1B7
tr	A0A061IHM8	A0A061IHM8
tr	A0A061HVD7	A0A061HVD7
tr	A0A061HUL8	A0A061HUL8
tr	A0A061IAA1	A0A061IAA1
tr	A0A061HZY8	A0A061HZY8
tr	A0A061IR44	A0A061IR44
tr	A0A061I6S9	A0A061I6S9
tr	A0A061IN36	A0A061IN36
tr	G3I881	G3I881
tr	G3I9B1	G3I9B1
tr	G3IF78	G3IF78
tr	G3IIM8	G3IIM8
tr	G3ILV5	G3ILV5
tr	G3I119	G3I119
tr	G3IK23	G3IK23
tr	G3GUD7	G3GUD7
tr	G3GXT5	G3GXT5
tr	G3GXE1	G3GXE1
tr	G3H668	G3H668
tr	G3H3R7	G3H3R7
tr	G3HC56	G3HC56
tr	G3H8K7	G3H8K7
tr	G3HI76	G3HI76
tr	G3HQY6	G3HQY6
tr	U3GSH1	U3GSH1
tr	G3IA26	G3IA26
tr	A0A061IC46	A0A061IC46
tr	A0A061IAA3	A0A061IAA3
tr	A0A061I451	A0A061I451
tr	A0A061IJH7	A0A061IJH7
tr	A0A061IKD1	A0A061IKD1
tr	A0A061I988	A0A061I988
tr	A0A061IR93	A0A061IR93
tr	G3HSJ5	G3HSJ5
tr	G3I0H3	G3I0H3
tr	G3HYD5	G3HYD5
tr	G3GVB7	G3GVB7
tr	G3GUB8	G3GUB8
tr	G3H565	G3H565
tr	G3HDH4	G3HDH4
tr	G3ILZ7	G3ILZ7
tr	G3IGX3	G3IGX3
tr	G3H205	G3H205
tr	G3HFY6	G3HFY6
tr	G3H4H3	G3H4H3
tr	G3H1Y3	G3H1Y3
tr	G3I471	G3I471
tr	G3I6J6	G3I6J6
tr	G3HYI7	G3HYI7
tr	G3HAY9	G3HAY9
tr	G3HYG7	G3HYG7
tr	G3GVL3	G3GVL3
tr	G3I9P1	G3I9P1
tr	G3GYI5	G3GYI5
tr	G3HF39	G3HF39
tr	G3HXY4	G3HXY4
tr	G3HHB6	G3HHB6
tr	G3HU06	G3HU06
tr	G3HV66	G3HV66
tr	G3HR36	G3HR36
tr	G3HX09	G3HX09
tr	G3ID98	G3ID98
tr	G3IEV1	G3IEV1
tr	G3IQ99	G3IQ99
tr	G3H3I5	G3H3I5
tr	A0A061HXZ1	A0A061HXZ1
tr	A0A061IAF0	A0A061IAF0
tr	A0A061I5L2	A0A061I5L2
tr	A0A061IET6	A0A061IET6
tr	A0A061IGF3	A0A061IGF3
tr	A0A061IPL6	A0A061IPL6
tr	A0A061ILZ9	A0A061ILZ9
tr	A0A061ICS0	A0A061ICS0
tr	A0A061ICH4	A0A061ICH4
tr	A0A061INZ7	A0A061INZ7
tr	G3HNR9	G3HNR9
tr	G3HSN9	G3HSN9
tr	G3HTL7	G3HTL7
tr	Q9R0D3	Q9R0D3
tr	G3IEV5	G3IEV5
tr	G3GTW9	G3GTW9
tr	G3H6I8	G3H6I8
tr	G3H8A3	G3H8A3
tr	A0A061I309	A0A061I309
tr	A0A061IIV9	A0A061IIV9
tr	A0A061I452	A0A061I452
tr	A0A061I1Y4	A0A061I1Y4
tr	A0A061IK01	A0A061IK01
tr	A0A061I9M2	A0A061I9M2
tr	A0A061I9Z6	A0A061I9Z6
tr	A0A061IJ09	A0A061IJ09
tr	A0A061IPX7	A0A061IPX7
tr	G3HSC3	G3HSC3
tr	G3HN19	G3HN19
tr	A0A061IIQ3	A0A061IIQ3
tr	G3HM44	G3HM44
tr	G3IPC4	G3IPC4
tr	G3IM41	G3IM41
tr	A0A061IK33	A0A061IK33
tr	A0A061IL07	A0A061IL07
tr	A0A061I533	A0A061I533
tr	A0A061IB58	A0A061IB58
tr	A0A061IDH0	A0A061IDH0
tr	A0A061IML4	A0A061IML4
tr	A0A061HZC0	A0A061HZC0
tr	A0A061I1P7	A0A061I1P7
tr	A0A061HXF5	A0A061HXF5
tr	A0A061I8I4	A0A061I8I4
tr	A0A061IEN5	A0A061IEN5
tr	A0A061I6L1	A0A061I6L1
tr	A0A061IJ36	A0A061IJ36
tr	G3H0Z5	G3H0Z5
tr	G3GZH7	G3GZH7
tr	G3H336	G3H336
tr	G3H0C5	G3H0C5
tr	G3H426	G3H426
tr	G3HE16	G3HE16
tr	G3H7C4	G3H7C4
tr	G3HHH4	G3HHH4
tr	A0A061I5Z4	A0A061I5Z4
tr	A0A061IDJ6	A0A061IDJ6
tr	G3HJP8	G3HJP8
tr	A0A061I4J7	A0A061I4J7
tr	G3HED4	G3HED4
tr	A0A061IL05	A0A061IL05
tr	A0A061IQQ0	A0A061IQQ0
tr	Q7TSX1	Q7TSX1
tr	A0A061I603	A0A061I603
tr	G3HMT7	G3HMT7
tr	G3GUU1	G3GUU1
tr	G3HM32	G3HM32
tr	G3I1H1	G3I1H1
tr	G3I2L2	G3I2L2
tr	G3I7H7	G3I7H7
tr	G3I7K3	G3I7K3
tr	G3I911	G3I911
tr	G3I9S7	G3I9S7
tr	G3HV52	G3HV52
tr	G3I960	G3I960
tr	G3IHL6	G3IHL6
tr	G3IDA0	G3IDA0
tr	G3IMZ2	G3IMZ2
tr	G3GTB9	G3GTB9
tr	G3H0F4	G3H0F4
tr	G3H1I7	G3H1I7
tr	G3H0D2	G3H0D2
tr	G3HE53	G3HE53
tr	G3H8R6	G3H8R6
tr	A0A061I5D1	A0A061I5D1
tr	A0A061IJT9	A0A061IJT9
tr	A0A061I4E6	A0A061I4E6
tr	A0A061ICA6	A0A061ICA6
tr	A0A061IIQ0	A0A061IIQ0
tr	A0A061ILT3	A0A061ILT3
tr	G3HS82	G3HS82
tr	G3HUC4	G3HUC4
tr	G3HZS4	G3HZS4
tr	G3H442	G3H442
tr	G3HQJ3	G3HQJ3
tr	G3HV30	G3HV30
tr	G3I3R1	G3I3R1
tr	G3IK84	G3IK84
tr	G3I9U8	G3I9U8
tr	G3INC5	G3INC5
tr	G3H4A1	G3H4A1
tr	G3HLE3	G3HLE3
tr	G3HZF9	G3HZF9
tr	G3HLY2	G3HLY2
tr	G3I6D8	G3I6D8
tr	G3GY33	G3GY33
tr	G3HIL3	G3HIL3
tr	G3HUX9	G3HUX9
tr	G3I3T7	G3I3T7
tr	G3HAC4	G3HAC4
tr	G3H7Z7	G3H7Z7
tr	A0A061I2U3	A0A061I2U3
tr	A0A061IKD3	A0A061IKD3
tr	A0A061IAY0	A0A061IAY0
tr	A0A061HYU3	A0A061HYU3
tr	A0A061I387	A0A061I387
tr	A0A061HYX4	A0A061HYX4
tr	A0A061HYA2	A0A061HYA2
tr	A0A061IH67	A0A061IH67
tr	A0A061IFU6	A0A061IFU6
tr	A0A061IIR8	A0A061IIR8
tr	Q6W3F5	Q6W3F5
tr	A0A061HYH3	A0A061HYH3
tr	A0A061IML1	A0A061IML1
tr	A0A061HXK1	A0A061HXK1
tr	A0A061IK82	A0A061IK82
tr	A0A061IHE4	A0A061IHE4
tr	G3HNT7	G3HNT7
tr	A0A061ILM9	A0A061ILM9
tr	G3HS33	G3HS33
tr	G3I6N3	G3I6N3
tr	G3GRR5	G3GRR5
tr	G3HIM3	G3HIM3
tr	G3HI85	G3HI85
tr	G3I918	G3I918
tr	G3IFC9	G3IFC9
tr	G3GU49	G3GU49
tr	G3H6E3	G3H6E3
tr	G3H5V6	G3H5V6
tr	Q9JKJ8	Q9JKJ8
tr	G3H691	G3H691
tr	A0A061I5X0	A0A061I5X0
tr	A0A061IQM4	A0A061IQM4
tr	A0A061HUM1	A0A061HUM1
tr	A0A061IPH4	A0A061IPH4
tr	G3I5I7	G3I5I7
tr	G3I6A6	G3I6A6
tr	G3IKS2	G3IKS2
tr	G3IEE2	G3IEE2
tr	G3GSQ0	G3GSQ0
tr	G3GST7	G3GST7
tr	G3H0M4	G3H0M4
tr	G3H311	G3H311
tr	G3HRM6	G3HRM6
tr	G3I777	G3I777
tr	G3HV64	G3HV64
tr	G3I7T3	G3I7T3
tr	G3I7I7	G3I7I7
tr	G3IEM2	G3IEM2
tr	G3HQX5	G3HQX5
tr	G3I936	G3I936
tr	G3GX55	G3GX55
tr	G3H339	G3H339
tr	G3H0N1	G3H0N1
tr	G3H9M8	G3H9M8
tr	G3HCC4	G3HCC4
tr	G3HA91	G3HA91
tr	G3HTN1	G3HTN1
tr	G3IJC0	G3IJC0
tr	G3GUL2	G3GUL2
tr	G3GVE5	G3GVE5
tr	G3H5J1	G3H5J1
tr	G3H386	G3H386
tr	G3HAP2	G3HAP2
tr	G3HDS3	G3HDS3
tr	G3HBQ6	G3HBQ6
tr	G3H9X4	G3H9X4
tr	G3INB3	G3INB3
tr	G3HID0	G3HID0
tr	A0A061I580	A0A061I580
tr	A0A061I7E6	A0A061I7E6
tr	A0A061IKQ9	A0A061IKQ9
tr	A0A061INA6	A0A061INA6
tr	A0A061IKL2	A0A061IKL2
tr	A0A061IQK1	A0A061IQK1
tr	A0A061IH05	A0A061IH05
tr	A0A061INV8	A0A061INV8
tr	G3HKF2	G3HKF2
tr	G3HKU9	G3HKU9
tr	G3I1C3	G3I1C3
tr	G3I001	G3I001
tr	A0A061IK80	A0A061IK80
tr	G3I5R0	G3I5R0
tr	G3IDM1	G3IDM1
tr	G3IQ83	G3IQ83
tr	G3GUL9	G3GUL9
tr	G3H0N9	G3H0N9
tr	G3IA55	G3IA55
tr	G3HMA1	G3HMA1
tr	G3ILN5	G3ILN5
tr	G3IM86	G3IM86
tr	A0A061I4Z3	A0A061I4Z3
tr	A0A061I2P0	A0A061I2P0
tr	A0A061ICH9	A0A061ICH9
tr	A0A061IEP0	A0A061IEP0
tr	A0A061HUH2	A0A061HUH2
tr	A0A061ICH0	A0A061ICH0
tr	A0A061I1Z2	A0A061I1Z2
tr	A0A061HZB8	A0A061HZB8
tr	A0A061IBM0	A0A061IBM0
tr	A0A061HWI2	A0A061HWI2
tr	A0A061IMU6	A0A061IMU6
tr	G3HNH0	G3HNH0
tr	G3HSR1	G3HSR1
tr	G3HZF7	G3HZF7
tr	G3ICN2	G3ICN2
tr	G3IDY1	G3IDY1
tr	G3IKN8	G3IKN8
tr	G3GSW8	G3GSW8
tr	G3H038	G3H038
tr	G3H619	G3H619
tr	G3H748	G3H748
tr	G3HFZ7	G3HFZ7
tr	G3HJ33	G3HJ33
tr	G3I1R9	G3I1R9
tr	G3IME1	G3IME1
tr	A0A061HV58	A0A061HV58
tr	A0A061IDS2	A0A061IDS2
tr	A0A061IJ72	A0A061IJ72
tr	A0A061HXJ4	A0A061HXJ4
tr	A0A061IL00	A0A061IL00
tr	A0A061I236	A0A061I236
tr	A0A061IGU3	A0A061IGU3
tr	A0A061HZP9	A0A061HZP9
tr	A0A061IKE7	A0A061IKE7
tr	A0A061I901	A0A061I901
tr	A0A061I8W0	A0A061I8W0
tr	A0A061I2R4	A0A061I2R4
tr	A0A061IDL8	A0A061IDL8
tr	A0A061IPE8	A0A061IPE8
tr	A0A061HVG7	A0A061HVG7
tr	A0A061IND8	A0A061IND8
tr	A0A061I0D7	A0A061I0D7
tr	A0A061IJN5	A0A061IJN5
tr	A0A061I656	A0A061I656
tr	A0A061IQS1	A0A061IQS1
tr	A0A061IQ01	A0A061IQ01
tr	A0A061ILY7	A0A061ILY7
tr	A0A061IPZ7	A0A061IPZ7
tr	G3HS71	G3HS71
tr	G3I5X2	G3I5X2
tr	G3I5U8	G3I5U8
tr	G3I7D0	G3I7D0
tr	G3GV11	G3GV11
tr	G3H4W5	G3H4W5
tr	G3GWB5	G3GWB5
tr	G3H8D4	G3H8D4
tr	G3HE39	G3HE39
tr	G3HE12	G3HE12
tr	G3H8H5	G3H8H5
tr	G3HNW2	G3HNW2
tr	A0A061HXU4	A0A061HXU4
tr	A0A061I3X3	A0A061I3X3
tr	A0A061I4T3	A0A061I4T3
tr	A0A061HV60	A0A061HV60
tr	A0A061HX39	A0A061HX39
tr	A0A061IQ23	A0A061IQ23
tr	A0A061IIU8	A0A061IIU8
tr	A0A061IIU3	A0A061IIU3
tr	A0A061IQQ2	A0A061IQQ2
tr	A0A061IIN3	A0A061IIN3
tr	Q8MHC4	Q8MHC4
tr	G3HQX8	G3HQX8
tr	G3HXN7	G3HXN7
tr	G3HZW1	G3HZW1
tr	G3GT93	G3GT93
tr	G3I437	G3I437
tr	G3I3Z6	G3I3Z6
tr	G3I5T2	G3I5T2
tr	G3I3T4	G3I3T4
tr	G3IFR5	G3IFR5
tr	G3IPK0	G3IPK0
tr	G3GSV4	G3GSV4
tr	G3HBV1	G3HBV1
tr	G3HIB9	G3HIB9
tr	G3I0V4	G3I0V4
tr	I1SNZ3	I1SNZ3
tr	G3HY58	G3HY58
tr	G3IPX3	G3IPX3
tr	G3HIN3	G3HIN3
tr	G3HN31	G3HN31
tr	G3HWR0	G3HWR0
tr	G3ICD4	G3ICD4
tr	G3I467	G3I467
tr	G3IFS4	G3IFS4
tr	G3IEE5	G3IEE5
tr	G3I0B5	G3I0B5
tr	G3GS31	G3GS31
tr	G3ILC9	G3ILC9
tr	G3GVR5	G3GVR5
tr	G3H4P4	G3H4P4
tr	G3IJR1	G3IJR1
tr	G3H8T0	G3H8T0
tr	G3IG75	G3IG75
tr	G3HDY6	G3HDY6
tr	Q2L4U1	Q2L4U1
tr	Q60424	Q60424
tr	A0A061HYX3	A0A061HYX3
tr	A0A061IKY2	A0A061IKY2
tr	A0A061IGL6	A0A061IGL6
tr	A0A061HTZ9	A0A061HTZ9
tr	G3IF34	G3IF34
tr	A0A061I684	A0A061I684
tr	A0A061I173	A0A061I173
tr	A0A061IKQ5	A0A061IKQ5
tr	A0A061I6U6	A0A061I6U6
tr	A0A061I812	A0A061I812
tr	A0A061ICL6	A0A061ICL6
tr	G3HKR6	G3HKR6
tr	G3HT55	G3HT55
tr	G3I295	G3I295
tr	G3IEC5	G3IEC5
tr	A0A061IEY5	A0A061IEY5
tr	G3GTR2	G3GTR2
tr	G3IDD4	G3IDD4
tr	G3GUZ7	G3GUZ7
tr	G3GZZ4	G3GZZ4
tr	G3IHR7	G3IHR7
tr	G3GW03	G3GW03
tr	G3HEE8	G3HEE8
tr	G3IEE9	G3IEE9
tr	G3HV40	G3HV40
tr	G3H9G2	G3H9G2
tr	G3HFP8	G3HFP8
tr	G3HHU2	G3HHU2
tr	G3IHU2	G3IHU2
tr	A0A061IKN9	A0A061IKN9
tr	A0A061IEF7	A0A061IEF7
tr	A0A061I888	A0A061I888
tr	A0A061I575	A0A061I575
tr	A0A061IBQ0	A0A061IBQ0
tr	A0A061INF0	A0A061INF0
tr	A0A061IK24	A0A061IK24
tr	G3GZ86	G3GZ86
tr	G3HYE7	G3HYE7
tr	G3IAN5	G3IAN5
tr	G3H704	G3H704
tr	G3HGM6	G3HGM6
tr	A0A061I3X9	A0A061I3X9
tr	G3H8D2	G3H8D2
tr	G3H419	G3H419
tr	G3HJT4	G3HJT4
tr	G3HI16	G3HI16
tr	G3HUA7	G3HUA7
tr	G3HWZ8	G3HWZ8
tr	G3I0X5	G3I0X5
tr	G3I7Q4	G3I7Q4
tr	G3I6N7	G3I6N7
tr	G3IL53	G3IL53
tr	G3IIA9	G3IIA9
tr	G3H841	G3H841
tr	A0A061I2T3	A0A061I2T3
tr	A0A061IL76	A0A061IL76
tr	A0A061IID2	A0A061IID2
tr	G3HQN2	G3HQN2
tr	G3IK14	G3IK14
tr	G3HLI0	G3HLI0
tr	A0A061HTG9	A0A061HTG9
tr	G3I7G9	G3I7G9
tr	G3HSR9	G3HSR9
tr	G3HZX2	G3HZX2
tr	G3I4B4	G3I4B4
tr	G3I473	G3I473
tr	G3IIC7	G3IIC7
tr	G3H8V1	G3H8V1
tr	G3H1M9	G3H1M9
tr	G3HBX4	G3HBX4
tr	G3IDK3	G3IDK3
tr	G3HZT0	G3HZT0
tr	G3HLE0	G3HLE0
tr	G3HLT3	G3HLT3
tr	G3IAQ6	G3IAQ6
tr	G3IJB4	G3IJB4
tr	G3GUY2	G3GUY2
tr	G3IIX4	G3IIX4
tr	G3HBL1	G3HBL1
tr	G3HPP1	G3HPP1
tr	G3HBW4	G3HBW4
tr	G3HW13	G3HW13
tr	G3IKX1	G3IKX1
tr	G3I9Q0	G3I9Q0
tr	G3IL04	G3IL04
tr	G3GUB0	G3GUB0
tr	G3GXZ5	G3GXZ5
tr	G3ILD1	G3ILD1
tr	G3I7K0	G3I7K0
tr	G3GZF5	G3GZF5
tr	G3H474	G3H474
tr	G3HI33	G3HI33
tr	A0A061I9V2	A0A061I9V2
tr	A0A061I2Z8	A0A061I2Z8
tr	G3IEW4	G3IEW4
tr	A0A061I069	A0A061I069
tr	A0A061HVE1	A0A061HVE1
tr	A0A061IP03	A0A061IP03
tr	A0A061IEJ8	A0A061IEJ8
tr	A0A061HVU0	A0A061HVU0
tr	A0A061HZ10	A0A061HZ10
tr	A0A061I598	A0A061I598
tr	Q60425	Q60425
tr	A0A061I1E6	A0A061I1E6
tr	A0A061IIX0	A0A061IIX0
tr	A0A061HY81	A0A061HY81
tr	A0A061HYF8	A0A061HYF8
tr	A0A061IFM6	A0A061IFM6
tr	A0A061IBG4	A0A061IBG4
tr	A0A061I6N8	A0A061I6N8
tr	A0A061II06	A0A061II06
tr	A0A061HZ66	A0A061HZ66
tr	A0A061I5G2	A0A061I5G2
tr	A0A061IRB7	A0A061IRB7
tr	A0A061I5F5	A0A061I5F5
tr	A0A061I4M4	A0A061I4M4
tr	A0A061IH91	A0A061IH91
tr	A0A061I8A2	A0A061I8A2
tr	A0A061HZU2	A0A061HZU2
tr	A0A061ILA8	A0A061ILA8
tr	A0A061IN31	A0A061IN31
tr	A0A061HWC2	A0A061HWC2
tr	A0A061HZ56	A0A061HZ56
tr	A0A061II08	A0A061II08
tr	A0A061IFD2	A0A061IFD2
tr	G3HK19	G3HK19
tr	G3HAJ7	G3HAJ7
tr	G3HA18	G3HA18
tr	G3HU81	G3HU81
tr	G3HQR5	G3HQR5
tr	G3HPD1	G3HPD1
tr	G3HTC7	G3HTC7
tr	G3HVJ3	G3HVJ3
tr	G3I8D2	G3I8D2
tr	G3I023	G3I023
tr	G3I412	G3I412
tr	G3I5I6	G3I5I6
tr	G3I6S0	G3I6S0
tr	G3I5Q7	G3I5Q7
tr	G3IAV6	G3IAV6
tr	G3I7U8	G3I7U8
tr	G3IHY3	G3IHY3
tr	G3IHL7	G3IHL7
tr	G3HYM2	G3HYM2
tr	G3GZP9	G3GZP9
tr	G3GYZ1	G3GYZ1
tr	G3HKW9	G3HKW9
tr	G3HHI8	G3HHI8
tr	G3IE06	G3IE06
tr	G3IJE7	G3IJE7
tr	G3HX84	G3HX84
tr	G3IBQ1	G3IBQ1
tr	G3HRP9	G3HRP9
tr	G3HT67	G3HT67
tr	G3IDA2	G3IDA2
tr	G3GX73	G3GX73
tr	G3I4J7	G3I4J7
tr	A0A061IL48	A0A061IL48
tr	A0A061IP77	A0A061IP77
tr	G3GX85	G3GX85
tr	A0A061I8D9	A0A061I8D9
tr	G3H9V7	G3H9V7
tr	G3HIF8	G3HIF8
tr	A0A061I3X0	A0A061I3X0
tr	G3HVC4	G3HVC4
tr	G3I464	G3I464
tr	G3GXX5	G3GXX5
tr	G3H6B2	G3H6B2
tr	G3I1L1	G3I1L1
tr	G3I4T7	G3I4T7
tr	G3GW30	G3GW30
tr	G3HCV1	G3HCV1
tr	G3IFL9	G3IFL9
tr	G3IFZ1	G3IFZ1
tr	G3IMB3	G3IMB3
tr	G3IPY2	G3IPY2
tr	G3H9N6	G3H9N6
tr	G3HBZ0	G3HBZ0
tr	G3HRD1	G3HRD1
tr	G3HQM6	G3HQM6
tr	G3IPU2	G3IPU2
tr	G3IJ18	G3IJ18
tr	G3ICZ1	G3ICZ1
tr	G3IAR8	G3IAR8
tr	G3HAQ0	G3HAQ0
tr	G3GTT6	G3GTT6
tr	G3HSP1	G3HSP1
tr	G3HQL0	G3HQL0
tr	G3I910	G3I910
tr	G3I7X6	G3I7X6
tr	A0A061HVN1	A0A061HVN1
tr	A0A061IBX0	A0A061IBX0
tr	A0A061IN84	A0A061IN84
tr	A0A061IQR5	A0A061IQR5
tr	A0A061HYC9	A0A061HYC9
tr	A0A061IM60	A0A061IM60
tr	A0A061HX13	A0A061HX13
tr	A0A061HXH1	A0A061HXH1
tr	A0A061HZ82	A0A061HZ82
tr	A0A061IAP0	A0A061IAP0
tr	A0A061HZV1	A0A061HZV1
tr	A0A061HX59	A0A061HX59
tr	A0A061ICE2	A0A061ICE2
tr	A0A061ILE4	A0A061ILE4
tr	A0A061INL1	A0A061INL1
tr	A0A061I005	A0A061I005
tr	A0A061INF6	A0A061INF6
tr	A0A061I960	A0A061I960
tr	A0A061I701	A0A061I701
tr	A0A061IPV7	A0A061IPV7
tr	A0A061IK86	A0A061IK86
tr	A0A061IQ74	A0A061IQ74
tr	A0A061I2Y9	A0A061I2Y9
tr	A0A061HYV4	A0A061HYV4
tr	A0A061IPX1	A0A061IPX1
tr	A0A061IR99	A0A061IR99
tr	A0A061IDE5	A0A061IDE5
tr	A0A061IL78	A0A061IL78
tr	A0A061ILZ6	A0A061ILZ6
tr	A0A061HUZ3	A0A061HUZ3
tr	A0A061IJ15	A0A061IJ15
tr	Q401Z9	Q401Z9
tr	A0A061I179	A0A061I179
tr	A0A061I1U3	A0A061I1U3
tr	A0A061HVH8	A0A061HVH8
tr	A0A061HYU6	A0A061HYU6
[truncated: 783 more rows]
